# Supplementary material for: Dual Targeting of the Akt/mTOR Signaling Pathway Inhibits Castration-Resistant Prostate Cancer in a Genetically Engineered Mouse Model
Source: Oxford University Press journal article supplement (doi:10.1158/0008-5472.can-12-0283), 2012-07-20
Supplement: 00085472can120283-sup-tab4.xlsx [file 00085472can120283-sup-tab4.xlsx]

## Sheet: p < 0.001
Supp. Table 4: Summary of differentially expressed genes for intact Nkx3.1CE2/+; Ptenf/f mice versus Nkx3.1CE2/+ mice
Row	Rank	Upregulated in	Feature	Description	Score	Feature P	FDR(BH)	Q Value	Bonferroni	Fold Change	Nkx3.1CE2/+-veh Mean	Nkx3.1CE2/+-veh Std	Nkx3.1CE2/+; Ptenf/f intact-veh Mean	Nkx3.1CE2/+; Ptenf/f intact-veh Std
1	1	Nkx3.1CE2/+; Ptenf/f intact-veh	LTF	Mus musculus lactotransferrin (Ltf), mRNA.	1205.95	6.8761e-07	0.000181676	NaN	0.00254347	117.467	170.261	28.4806	20000	0
2	2	Nkx3.1CE2/+; Ptenf/f intact-veh	LOC100048733	PREDICTED: Mus musculus similar to WAP four-disulfide core domain 2 (LOC100048733), mRNA.	490.974	4.1484e-06	0.000333586	NaN	0.0153449	106.303	188.142	69.892	20000	0
3	3	Nkx3.1CE2/+; Ptenf/f intact-veh	NUPR1	Mus musculus nuclear protein 1 (Nupr1), mRNA.	426.367	5.50084e-06	0.00035181	NaN	0.0203476	40.6746	491.708	79.2495	20000	0
4	7	Nkx3.1CE2/+; Ptenf/f intact-veh	ANXA3	Mus musculus annexin A3 (Anxa3), mRNA.	118.006	7.18036e-05	0.000900747	NaN	0.265601	12.3558	1618.67	269.795	20000	0
5	8	Nkx3.1CE2/+; Ptenf/f intact-veh	MFGE8	NULL	92.4605	1.50171e-11	5.55482e-08	NaN	5.55482e-08	4.74327	4184.11	123.605	19846.4	376.311
6	9	Nkx3.1CE2/+; Ptenf/f intact-veh	WFDC2	Mus musculus WAP four-disulfide core domain 2 (Wfdc2), mRNA.	92.2965	0.000117369	0.00116706	NaN	0.434148	34.0369	587.598	364.296	20000	0
7	10	Nkx3.1CE2/+; Ptenf/f intact-veh	ATP1A1	Mus musculus ATPase, Na+/K+ transporting, alpha 1 polypeptide (Atp1a1), mRNA.	89.5907	0.000124564	0.00118778	NaN	0.460763	2.97629	6719.78	256.745	20000	0
8	11	Nkx3.1CE2/+; Ptenf/f intact-veh	KRT15	Mus musculus keratin 15 (Krt15), mRNA.	88.5721	0.000127445	0.0011965	NaN	0.471419	12.1547	1645.46	358.928	20000	0
9	12	Nkx3.1CE2/+; Ptenf/f intact-veh	PGLYRP1	NULL	77.9886	0.000164373	0.00133699	NaN	0.608016	30.5181	655.348	429.626	20000	0
10	13	Nkx3.1CE2/+; Ptenf/f intact-veh	LCN2	Mus musculus lipocalin 2 (Lcn2), mRNA.	74.7611	0.000178868	0.00138279	NaN	0.661632	22.0257	908.03	442.319	20000	0
11	14	Nkx3.1CE2/+; Ptenf/f intact-veh	IFITM1	Mus musculus interferon induced transmembrane protein 1 (Ifitm1), mRNA.	69.5879	0.000206442	0.0014657	NaN	0.76363	4.89019	4089.82	396.006	20000	0
12	16	Nkx3.1CE2/+; Ptenf/f intact-veh	SLC12A2	Mus musculus solute carrier family 12, member 2 (Slc12a2), mRNA.	61.4438	0.000264771	0.00164603	NaN	0.979389	18.3462	1090.15	533.053	20000	0
13	17	Nkx3.1CE2/+; Ptenf/f intact-veh	CBR2	Mus musculus carbonyl reductase 2 (Cbr2), mRNA.	59.9919	0.000277737	0.00168267	NaN	1	16.5493	1208.51	542.537	20000	0
14	18	Nkx3.1CE2/+; Ptenf/f intact-veh	CYP2F2	Mus musculus cytochrome P450, family 2, subfamily f, polypeptide 2 (Cyp2f2), mRNA.	50.3127	0.000394809	0.00196479	NaN	1	20.142	992.952	654.331	20000	0
15	19	Nkx3.1CE2/+; Ptenf/f intact-veh	IFITM3	Mus musculus interferon induced transmembrane protein 3 (Ifitm3), mRNA.	50.0595	0.000398811	0.00196745	NaN	1	3.97561	5030.68	517.936	20000	0
16	20	Nkx3.1CE2/+; Ptenf/f intact-veh	CTSB	Mus musculus cathepsin B (Ctsb), mRNA.	49.3644	6.02321e-08	2.47554e-05	NaN	0.000222799	3.87833	4956.16	25.1667	19221.6	706.964
17	21	Nkx3.1CE2/+; Ptenf/f intact-veh	LGALS3BP	Mus musculus lectin, galactoside-binding, soluble, 3 binding protein (Lgals3bp), mRNA.	44.8507	5.23817e-08	2.43848e-05	NaN	0.00019376	28.7848	680.364	118.881	19584.1	1018.64
18	22	Nkx3.1CE2/+; Ptenf/f intact-veh	ZFP36L1	Mus musculus zinc finger protein 36, C3H type-like 1 (Zfp36l1), mRNA.	40.3779	0.000612793	0.0025729	NaN	1	3.31936	6025.26	599.461	20000	0
19	23	Nkx3.1CE2/+; Ptenf/f intact-veh	FXYD3	Mus musculus FXYD domain-containing ion transport regulator 3 (Fxyd3), mRNA.	34.4401	3.19655e-08	1.97067e-05	NaN	0.00011824	9.5117	2030.62	291.163	19314.6	1158.28
20	25	Nkx3.1CE2/+; Ptenf/f intact-veh	GSTO1	Mus musculus glutathione S-transferase omega 1 (Gsto1), mRNA.	32.0613	0.000971415	0.00343343	NaN	1	5.35178	3737.08	878.574	20000	0
23	29	Nkx3.1CE2/+; Ptenf/f intact-veh	LY6D	Mus musculus lymphocyte antigen 6 complex, locus D (Ly6d), mRNA.	28.3445	1.02345e-06	0.000222692	NaN	0.00378576	100.266	184.303	3.95626	18479.5	1581.03
25	32	Nkx3.1CE2/+; Ptenf/f intact-veh	LGALS3	Mus musculus lectin, galactose binding, soluble 3 (Lgals3), mRNA.	25.8359	1.53709e-06	0.000256474	NaN	0.00568571	25.1734	752.315	62.7826	18938.3	1721.92
26	33	Nkx3.1CE2/+; Ptenf/f intact-veh	BCL6	Mus musculus B-cell leukemia/lymphoma 6 (Bcl6), mRNA.	25.3723	5.27381e-08	2.43848e-05	NaN	0.000195078	3.81432	955.828	110.096	3645.83	207.849
30	38	Nkx3.1CE2/+; Ptenf/f intact-veh	SUSD4	Mus musculus sushi domain containing 4 (Susd4), mRNA.	22.5577	2.63577e-06	0.000292426	NaN	0.0097497	3.00852	141.225	2.16367	424.877	30.6488
31	39	Nkx3.1CE2/+; Ptenf/f intact-veh	TM4SF4	Mus musculus transmembrane 4 superfamily member 4 (Tm4sf4), mRNA.	21.8819	3.57277e-06	0.000315658	NaN	0.0132157	8.08656	140.458	3.39934	1135.82	111.319
32	41	Nkx3.1CE2/+; Ptenf/f intact-veh	ELF3	Mus musculus E74-like factor 3 (Elf3), mRNA.	21.4944	2.73874e-06	0.000292426	NaN	0.0101306	21.2972	398.085	94.2468	8478.1	911.094
33	42	Nkx3.1CE2/+; Ptenf/f intact-veh	MAN2B2	Mus musculus mannosidase 2, alpha B2 (Man2b2), mRNA.	20.6279	1.66558e-06	0.000256707	NaN	0.00616097	4.91853	187.091	15.1765	920.211	84.368
35	44	Nkx3.1CE2/+; Ptenf/f intact-veh	H2-T23	Mus musculus histocompatibility 2, T region locus 23 (H2-T23), mRNA.	20.1968	4.3254e-06	0.000340418	NaN	0.0159997	7.72706	2429.24	162.071	18770.9	1968.63
36	45	Nkx3.1CE2/+; Ptenf/f intact-veh	FOSL2	Mus musculus fos-like antigen 2 (Fosl2), mRNA.	19.8309	1.8228e-06	0.000259328	NaN	0.00674254	12.3274	514.719	133.139	6345.15	695.12
37	46	Nkx3.1CE2/+; Ptenf/f intact-veh	LOC100045864	PREDICTED: Mus musculus similar to HLA-G protein (LOC100045864), misc RNA.	19.5103	0.00018946	0.00141009	NaN	0.700813	2.72715	7222.68	975.5	19697.3	741.42
38	47	Nkx3.1CE2/+; Ptenf/f intact-veh	2510049J12RIK	PREDICTED: Mus musculus RIKEN cDNA 2510049J12 gene, transcript variant 1 (2510049J12Rik), mRNA.	19.3672	5.42832e-06	0.00035181	NaN	0.0200794	6.43133	129.157	7.03296	830.652	88.1633
39	50	Nkx3.1CE2/+; Ptenf/f intact-veh	SAMD9L	PREDICTED: Mus musculus sterile alpha motif domain containing 9-like, transcript variant 1 (Samd9l), mRNA.	19.2701	5.80431e-06	0.00035197	NaN	0.0214702	15.8404	464.729	62.5973	7361.47	872.189
40	52	Nkx3.1CE2/+; Ptenf/f intact-veh	TBC1D1	Mus musculus TBC1 domain family, member 1 (Tbc1d1), mRNA.	19.2097	3.72594e-07	0.000125293	NaN	0.00137822	2.89985	268.911	28.0035	779.802	51.7255
41	53	Nkx3.1CE2/+; Ptenf/f intact-veh	SLC39A4	Mus musculus solute carrier family 39 (zinc transporter), member 4 (Slc39a4), mRNA.	19.1806	5.70658e-06	0.00035181	NaN	0.0211086	10.5547	1738.45	167.786	18348.9	2107.96
42	54	Nkx3.1CE2/+; Ptenf/f intact-veh	LMO4	Mus musculus LIM domain only 4 (Lmo4), mRNA.	19.1778	5.19938e-05	0.000778644	NaN	0.192325	2.74824	7071.29	925.927	19433.6	882.323
43	55	Nkx3.1CE2/+; Ptenf/f intact-veh	SLC4A2	Mus musculus solute carrier family 4 (anion exchanger), member 2 (Slc4a2), mRNA.	18.7416	6.59617e-06	0.000369686	NaN	0.0243992	3.56147	743.868	18.3927	2649.26	247.669
44	57	Nkx3.1CE2/+; Ptenf/f intact-veh	CXCL16	Mus musculus chemokine (C-X-C motif) ligand 16 (Cxcl16), mRNA.	18.2634	5.08966e-06	0.00035181	NaN	0.0188267	12.3389	374.712	74.2793	4623.52	560.084
45	59	Nkx3.1CE2/+; Ptenf/f intact-veh	RNASET2	Mus musculus ribonuclease T2 (Rnaset2), transcript variant 2, mRNA.	17.8987	2.76694e-06	0.000292426	NaN	0.0102349	4.84248	1878.54	490.477	9096.77	703.339
46	60	Nkx3.1CE2/+; Ptenf/f intact-veh	APOB48R	Mus musculus apolipoprotein B48 receptor (Apob48r), mRNA.	17.8498	1.00283e-05	0.000414649	NaN	0.0370947	38.1013	164.638	14.5658	6272.91	837.97
47	61	Nkx3.1CE2/+; Ptenf/f intact-veh	TMEM176A	Mus musculus transmembrane protein 176A (Tmem176a), mRNA.	17.8197	5.67574e-06	0.00035181	NaN	0.0209946	4.76469	702.853	48.272	3348.88	357.259
48	62	Nkx3.1CE2/+; Ptenf/f intact-veh	4930402H24RIK	Mus musculus RIKEN cDNA 4930402H24 gene (4930402H24Rik), mRNA.	17.693	4.86721e-06	0.00035181	NaN	0.0180038	2.76901	368.012	13.8074	1019.03	87.9889
49	65	Nkx3.1CE2/+; Ptenf/f intact-veh	IDH1	Mus musculus isocitrate dehydrogenase 1 (NADP+), soluble (Idh1), mRNA.	17.4432	3.62009e-06	0.000315658	NaN	0.0133907	5.64594	1894.38	231.979	10695.5	1191.58
50	66	Nkx3.1CE2/+; Ptenf/f intact-veh	ITGB4	Mus musculus integrin beta 4 (Itgb4), transcript variant 1, mRNA.	17.3867	7.49122e-06	0.000390282	NaN	0.02771	7.83734	831.342	91.61	6515.51	790.255
51	68	Nkx3.1CE2/+; Ptenf/f intact-veh	2011-09-09	Mus musculus septin 9 (Sept9), mRNA.	17.3796	6.57673e-06	0.000369686	NaN	0.0243273	8.97359	232.044	34.1398	2082.27	256.264
52	69	Nkx3.1CE2/+; Ptenf/f intact-veh	CBR3	Mus musculus carbonyl reductase 3 (Cbr3), mRNA.	17.3358	1.15106e-05	0.000431707	NaN	0.0425776	6.4907	511.197	8.8338	3318.02	396.398
53	70	Nkx3.1CE2/+; Ptenf/f intact-veh	LARGE	Mus musculus like-glycosyltransferase (Large), mRNA.	17.2457	5.43135e-07	0.000167421	NaN	0.00200906	2.51254	336.685	26.9608	845.934	61.4656
54	71	Nkx3.1CE2/+; Ptenf/f intact-veh	FER1L3	NULL	17.2188	1.14097e-05	0.000431707	NaN	0.0422046	30.1449	308.844	54.0261	9310.07	1278.21
55	72	Nkx3.1CE2/+; Ptenf/f intact-veh	EG433865	PREDICTED: Mus musculus predicted gene, EG433865 (EG433865), mRNA.	17.15	7.57572e-07	0.000186817	NaN	0.00280226	6.59023	906.376	233.162	5973.23	644.2
56	73	Nkx3.1CE2/+; Ptenf/f intact-veh	FBXO4	Mus musculus F-box protein 4 (Fbxo4), mRNA.	17.1407	1.56383e-06	0.000256474	NaN	0.0057846	2.96929	570.999	42.0196	1695.46	149.299
57	74	Nkx3.1CE2/+; Ptenf/f intact-veh	LOC100042514	PREDICTED: Mus musculus hypothetical protein LOC100042514 (LOC100042514), mRNA.	17.0557	1.07078e-05	0.000425896	NaN	0.0396083	75.7354	249.705	192.662	18911.5	2666.27
58	75	Nkx3.1CE2/+; Ptenf/f intact-veh	LY6C1	Mus musculus lymphocyte antigen 6 complex, locus C1 (Ly6c1), mRNA.	17.0519	1.15542e-05	0.000431707	NaN	0.042739	19.0176	837.014	116.122	15918	2160.14
59	76	Nkx3.1CE2/+; Ptenf/f intact-veh	CYB5R3	Mus musculus cytochrome b5 reductase 3 (Cyb5r3), mRNA.	17.0206	1.11926e-06	0.000230007	NaN	0.00414013	3.41597	2563.64	259.589	8757.3	812.239
60	78	Nkx3.1CE2/+; Ptenf/f intact-veh	2310016C16RIK	Mus musculus RIKEN cDNA 2310016C16 gene (2310016C16Rik), mRNA.	16.7688	1.02009e-05	0.000414649	NaN	0.0377331	3.83043	881.352	35.1656	3375.96	360.988
61	79	Nkx3.1CE2/+; Ptenf/f intact-veh	TACSTD2	Mus musculus tumor-associated calcium signal transducer 2 (Tacstd2), mRNA.	16.7496	1.30536e-05	0.000449684	NaN	0.0482853	46.2806	392.831	112.075	18180.5	2596.46
62	80	Nkx3.1CE2/+; Ptenf/f intact-veh	MGST1	Mus musculus microsomal glutathione S-transferase 1 (Mgst1), mRNA.	16.6164	1.01163e-05	0.000414649	NaN	0.0374201	14.1273	635.29	129.117	8974.95	1215.75
63	81	Nkx3.1CE2/+; Ptenf/f intact-veh	SYNPO	PREDICTED: Mus musculus synaptopodin, transcript variant 2 (Synpo), mRNA.	16.6026	9.28721e-06	0.000410694	NaN	0.0343534	8.53024	451.977	59.0887	3855.48	495.14
64	82	Nkx3.1CE2/+; Ptenf/f intact-veh	SCOTIN	Mus musculus scotin gene (Scotin), transcript variant 1, mRNA.	16.4865	1.32524e-05	0.000449684	NaN	0.0490207	7.98593	2206.76	141.839	17623	2281.67
65	83	Nkx3.1CE2/+; Ptenf/f intact-veh	BCL3	Mus musculus B-cell leukemia/lymphoma 3 (Bcl3), mRNA.	16.365	1.20622e-05	0.000433187	NaN	0.0446182	5.84135	145.853	9.42555	851.978	104.848
66	84	Nkx3.1CE2/+; Ptenf/f intact-veh	5830411I20	NULL	16.3191	2.28423e-06	0.000281645	NaN	0.00844936	7.61641	316.143	80.2615	2407.87	292.731
67	85	Nkx3.1CE2/+; Ptenf/f intact-veh	EG665509	PREDICTED: Mus musculus predicted gene, EG665509 (EG665509), mRNA.	16.2988	1.44628e-05	0.000461125	NaN	0.0534978	16.3107	195.676	24.186	3191.61	448.947
68	86	Nkx3.1CE2/+; Ptenf/f intact-veh	NOTCH3	Mus musculus Notch gene homolog 3 (Drosophila) (Notch3), mRNA.	16.1974	9.77409e-06	0.000414649	NaN	0.0361544	4.64885	152.845	10.7723	710.552	82.9533
69	87	Nkx3.1CE2/+; Ptenf/f intact-veh	OASL2	Mus musculus 2'-5' oligoadenylate synthetase-like 2 (Oasl2), mRNA.	16.0028	1.31206e-05	0.000449684	NaN	0.0485331	27.8947	522.442	202.815	14573.4	2131.51
70	88	Nkx3.1CE2/+; Ptenf/f intact-veh	SFT2D2	Mus musculus SFT2 domain containing 2 (Sft2d2), mRNA.	15.9312	1.59473e-06	0.000256474	NaN	0.00589889	5.2936	1054.64	207.103	5582.86	631.628
71	89	Nkx3.1CE2/+; Ptenf/f intact-veh	ZNRF1	Mus musculus zinc and ring finger 1 (Znrf1), mRNA.	15.8955	1.50086e-06	0.000256474	NaN	0.00555168	3.64149	329.975	40.8732	1201.6	121.243
73	91	Nkx3.1CE2/+; Ptenf/f intact-veh	CD9	NULL	15.5897	1.90724e-06	0.000260081	NaN	0.00705488	4.22081	3720.4	553.5	15703.1	1712.31
74	93	Nkx3.1CE2/+; Ptenf/f intact-veh	PRMT2	Mus musculus protein arginine N-methyltransferase 2 (Prmt2), transcript variant 2, mRNA.	15.5442	2.37782e-06	0.000283728	NaN	0.00879556	4.85548	546.41	91.8602	2653.08	305.5
75	94	Nkx3.1CE2/+; Ptenf/f intact-veh	LASS5	NULL	15.4972	9.12629e-06	0.000410694	NaN	0.0337582	3.92526	479.38	35.9377	1881.69	215.744
76	95	Nkx3.1CE2/+; Ptenf/f intact-veh	HTATIP2	NULL	15.4426	4.11465e-06	0.000333586	NaN	0.0152201	2.6635	1060	65.8207	2823.3	263.75
77	97	Nkx3.1CE2/+; Ptenf/f intact-veh	ANK	Mus musculus progressive ankylosis (Ank), mRNA.	15.3399	1.21553e-06	0.000236644	NaN	0.00449624	6.72757	338.773	114.424	2279.12	264.221
78	98	Nkx3.1CE2/+; Ptenf/f intact-veh	MLLT3	Mus musculus myeloid/lymphoid or mixed-lineage leukemia (trithorax homolog, Drosophila); translocated to, 3 (Mllt3), transcript variant 1, mRNA.	15.2992	8.07809e-06	0.000397777	NaN	0.0298809	3.41403	178.079	12.4767	607.965	66.5273
79	99	Nkx3.1CE2/+; Ptenf/f intact-veh	ABCC5	Mus musculus ATP-binding cassette, sub-family C (CFTR/MRP), member 5 (Abcc5), transcript variant 2, mRNA.	15.2183	5.6799e-06	0.00035181	NaN	0.02101	3.68003	281.873	26.2168	1037.3	115.801
80	100	Nkx3.1CE2/+; Ptenf/f intact-veh	LRG1	Mus musculus leucine-rich alpha-2-glycoprotein 1 (Lrg1), mRNA.	15.1139	2.27149e-05	0.00056015	NaN	0.0840225	19.1164	700.069	39.8313	13382.8	2054.71
81	101	Nkx3.1CE2/+; Ptenf/f intact-veh	PRKD2	Mus musculus protein kinase D2 (Prkd2), mRNA.	15.0739	1.3604e-05	0.000449684	NaN	0.0503211	3.29292	744.84	37.0614	2452.7	272.53
82	102	Nkx3.1CE2/+; Ptenf/f intact-veh	TMPRSS4	Mus musculus transmembrane protease, serine 4 (Tmprss4), mRNA.	15.0629	2.23185e-05	0.00056015	NaN	0.082556	21.5455	138.683	17.9632	2987.98	462.649
83	103	Nkx3.1CE2/+; Ptenf/f intact-veh	IFITM2	Mus musculus interferon induced transmembrane protein 2 (Ifitm2), mRNA.	14.979	1.53199e-05	0.000476206	NaN	0.0566685	7.01212	2479	298.001	17383	2400.51
84	107	Nkx3.1CE2/+; Ptenf/f intact-veh	ZFP532	Mus musculus zinc finger protein 532 (Zfp532), mRNA.	14.8104	1.79651e-05	0.000504137	NaN	0.0664527	4.42141	223.411	13.5923	987.793	124.951
85	109	Nkx3.1CE2/+; Ptenf/f intact-veh	EPSTI1	Mus musculus epithelial stromal interaction 1 (breast) (Epsti1), transcript variant a, mRNA.	14.7954	2.34222e-05	0.000566266	NaN	0.0866387	6.38874	145.343	6.9135	928.559	129.298
87	113	Nkx3.1CE2/+; Ptenf/f intact-veh	CAPN2	NULL	14.5873	1.36952e-05	0.000449684	NaN	0.0506587	6.56519	304.01	43.6009	1995.89	277.326
88	114	Nkx3.1CE2/+; Ptenf/f intact-veh	ATP10B	Mus musculus ATPase, class V, type 10B (Atp10b), mRNA.	14.5035	2.15555e-05	0.000549888	NaN	0.0797338	10.9197	181.956	28.933	1986.9	302.078
89	115	Nkx3.1CE2/+; Ptenf/f intact-veh	MIR16	Mus musculus membrane interacting protein of RGS16 (Mir16), mRNA.	14.461	1.64382e-05	0.000482577	NaN	0.0608048	11.7836	1275.84	319.721	15033.9	2286.15
90	116	Nkx3.1CE2/+; Ptenf/f intact-veh	BC024561	Mus musculus cDNA sequence BC024561 (BC024561), mRNA.	14.4433	2.86621e-05	0.000609316	NaN	0.106021	98.9686	134.131	15.3969	13274.8	2228.46
91	117	Nkx3.1CE2/+; Ptenf/f intact-veh	GEMIN4	Mus musculus gem (nuclear organelle) associated protein 4 (Gemin4), mRNA.	14.4211	7.4207e-06	0.000390282	NaN	0.0274492	4.59223	329.466	44.1239	1512.98	191.095
92	118	Nkx3.1CE2/+; Ptenf/f intact-veh	MAPKAPK3	NULL	14.3962	2.84409e-05	0.000608109	NaN	0.105203	7.1571	164.221	5.0267	1175.34	171.894
93	119	Nkx3.1CE2/+; Ptenf/f intact-veh	LAD1	Mus musculus ladinin (Lad1), mRNA.	14.3661	1.96871e-06	0.000260081	NaN	0.00728226	3.67203	675.68	122.577	2481.12	254.388
94	120	Nkx3.1CE2/+; Ptenf/f intact-veh	KRT19	Mus musculus keratin 19 (Krt19), mRNA.	14.2557	6.36074e-06	0.000367631	NaN	0.0235284	5.93701	2994.69	606.521	17779.5	2391.21
95	121	Nkx3.1CE2/+; Ptenf/f intact-veh	CCDC23	Mus musculus coiled-coil domain containing 23 (Ccdc23), transcript variant 1, mRNA.	14.2322	1.59686e-05	0.000480227	NaN	0.059068	2.70916	849.126	37.7051	2300.42	244.022
96	122	Nkx3.1CE2/+; Ptenf/f intact-veh	NAT2	Mus musculus N-acetyltransferase 2 (arylamine N-acetyltransferase) (Nat2), mRNA.	14.2313	3.25835e-06	0.000315658	NaN	0.0120526	3.52952	242.751	31.5747	856.796	95.7931
97	124	Nkx3.1CE2/+; Ptenf/f intact-veh	CCHCR1	Mus musculus coiled-coil alpha-helical rod protein 1 (Cchcr1), mRNA.	14.1531	2.71913e-05	0.000608109	NaN	0.100581	4.17466	181.373	7.23736	757.169	99.1267
98	125	Nkx3.1CE2/+; Ptenf/f intact-veh	ARHGAP27	Mus musculus Rho GTPase activating protein 27 (Arhgap27), transcript variant 1, mRNA.	14.012	1.86442e-05	0.000510851	NaN	0.0689649	3.66781	236.621	15.6974	867.883	108.097
99	126	Nkx3.1CE2/+; Ptenf/f intact-veh	SRXN1	Mus musculus sulfiredoxin 1 homolog (S. cerevisiae) (Srxn1), mRNA.	13.9492	8.23044e-06	0.000397777	NaN	0.0304444	2.94692	248.111	19.2962	731.163	80.3151
100	127	Nkx3.1CE2/+; Ptenf/f intact-veh	PPM1L	NULL	13.9362	3.44196e-06	0.000315658	NaN	0.0127318	4.07286	186.205	30.8583	758.386	90.6071
101	128	Nkx3.1CE2/+; Ptenf/f intact-veh	BARX2	Mus musculus BarH-like homeobox 2 (Barx2), mRNA.	13.8761	3.34751e-05	0.00065	NaN	0.123824	22.0766	167.921	23.9583	3707.13	623.84
102	129	Nkx3.1CE2/+; Ptenf/f intact-veh	4931426K16RIK	NULL	13.8529	3.66945e-06	0.000315658	NaN	0.0135733	3.42745	563.982	106.389	1933.02	189.64
103	131	Nkx3.1CE2/+; Ptenf/f intact-veh	REG3G	Mus musculus regenerating islet-derived 3 gamma (Reg3g), mRNA.	13.8097	3.56619e-05	0.000662881	NaN	0.131913	61.7058	118.402	11.8765	7306.12	1274.81
104	132	Nkx3.1CE2/+; Ptenf/f intact-veh	CD44	Mus musculus CD44 antigen (Cd44), transcript variant 2, mRNA.	13.8013	2.89135e-05	0.000611148	NaN	0.106951	15.3796	265.02	58.6855	4075.9	671.256
105	133	Nkx3.1CE2/+; Ptenf/f intact-veh	1810037I17RIK	Mus musculus RIKEN cDNA 1810037I17 gene (1810037I17Rik), mRNA.	13.7791	1.31614e-05	0.000449684	NaN	0.0486841	2.84761	4689.72	769.345	13354.5	1090.33
106	134	Nkx3.1CE2/+; Ptenf/f intact-veh	CTSH	Mus musculus cathepsin H (Ctsh), mRNA.	13.7688	2.14834e-05	0.000549888	NaN	0.079467	10.7816	1165.57	275.639	12566.7	1990.46
107	136	Nkx3.1CE2/+; Ptenf/f intact-veh	CAR13	Mus musculus carbonic anhydrase 13 (Car13), mRNA.	13.6106	3.79409e-05	0.000681842	NaN	0.140343	24.7134	143.436	12.347	3544.8	611.894
108	137	Nkx3.1CE2/+; Ptenf/f intact-veh	CXCL17	Mus musculus chemokine (C-X-C motif) ligand 17 (Cxcl17), mRNA.	13.5912	3.8563e-05	0.000681842	NaN	0.142644	80.318	146.955	18.6694	11803.2	2100.58
109	138	Nkx3.1CE2/+; Ptenf/f intact-veh	ARL6IP5	Mus musculus ADP-ribosylation factor-like 6 interacting protein 5 (Arl6ip5), mRNA.	13.5612	3.23018e-06	0.000315658	NaN	0.0119484	3.03561	318.341	39.3746	966.357	102.954
110	139	Nkx3.1CE2/+; Ptenf/f intact-veh	GJB3	Mus musculus gap junction protein, beta 3 (Gjb3), mRNA.	13.5112	2.26521e-05	0.00056015	NaN	0.0837903	4.08994	307.375	24.4349	1257.15	168.684
111	140	Nkx3.1CE2/+; Ptenf/f intact-veh	GDE1	Mus musculus glycerophosphodiester phosphodiesterase 1 (Gde1), mRNA.	13.5069	3.03743e-05	0.00063284	NaN	0.112355	13.4169	422.295	93.3561	5665.89	941.719
112	141	Nkx3.1CE2/+; Ptenf/f intact-veh	PML	Mus musculus promyelocytic leukemia (Pml), transcript variant 2, mRNA.	13.4407	3.20381e-05	0.000645814	NaN	0.118509	3.9795	813.189	40.9976	3236.09	437.735
113	143	Nkx3.1CE2/+; Ptenf/f intact-veh	KCNK5	Mus musculus potassium channel, subfamily K, member 5 (Kcnk5), mRNA.	13.3791	4.11499e-05	0.000702039	NaN	0.152213	18.8883	168.582	12.3961	3184.22	551.834
114	144	Nkx3.1CE2/+; Ptenf/f intact-veh	D11LGP2E	NULL	13.3594	3.76178e-05	0.000681842	NaN	0.139148	9.72412	140.181	14.1218	1363.14	223.343
115	146	Nkx3.1CE2/+; Ptenf/f intact-veh	PDLIM1	Mus musculus PDZ and LIM domain 1 (elfin) (Pdlim1), mRNA.	13.3061	3.87096e-05	0.000681842	NaN	0.143187	16.6432	757.868	131.874	12613.3	2174.47
116	147	Nkx3.1CE2/+; Ptenf/f intact-veh	LUZP1	NULL	13.2988	3.36837e-05	0.00065	NaN	0.124596	3.71813	725.438	33.966	2697.27	359.998
117	148	Nkx3.1CE2/+; Ptenf/f intact-veh	ZFP608	Mus musculus zinc finger protein 608 (Zfp608), mRNA. XM_001000874 XM_001000888 XM_001000902 XM_001000914 XM_993937 XM_993952 XM_993993 XM_994038 XM_994057 XM_994076	13.2945	3.38696e-05	0.00065	NaN	0.125284	6.45829	187.99	17.5393	1214.1	187.423
118	149	Nkx3.1CE2/+; Ptenf/f intact-veh	2010106G01RIK	Mus musculus RIKEN cDNA 2010106G01 gene (2010106G01Rik), mRNA.	13.2859	3.35267e-06	0.000315658	NaN	0.0124015	3.66297	173.723	30.3052	636.341	73.7423
119	150	Nkx3.1CE2/+; Ptenf/f intact-veh	PPP1R1B	Mus musculus protein phosphatase 1, regulatory (inhibitor) subunit 1B (Ppp1r1b), mRNA.	13.2444	4.08359e-05	0.000702039	NaN	0.151052	45.4088	300.708	124.868	13654.8	2463.46
120	151	Nkx3.1CE2/+; Ptenf/f intact-veh	1810011O10RIK	Mus musculus RIKEN cDNA 1810011O10 gene (1810011O10Rik), mRNA.	13.2269	1.89236e-05	0.000514694	NaN	0.0699984	4.59323	286.011	33.5405	1313.72	184.315
121	152	Nkx3.1CE2/+; Ptenf/f intact-veh	UBE1L	Mus musculus ubiquitin-activating enzyme E1-like (Ube1l), mRNA.	13.2197	2.0419e-05	0.000535673	NaN	0.0755298	5.64294	1206.3	174.55	6807.09	1007.99
122	153	Nkx3.1CE2/+; Ptenf/f intact-veh	HES6	Mus musculus hairy and enhancer of split 6 (Drosophila) (Hes6), mRNA.	13.161	2.6322e-05	0.000608109	NaN	0.0973649	5.65012	321.782	39.0877	1818.11	272.951
123	154	Nkx3.1CE2/+; Ptenf/f intact-veh	BBOX1	Mus musculus butyrobetaine (gamma), 2-oxoglutarate dioxygenase 1 (gamma-butyrobetaine hydroxylase) (Bbox1), mRNA.	13.1516	2.82143e-05	0.000608109	NaN	0.104365	5.11865	120.093	12.1086	614.711	90.5176
124	155	Nkx3.1CE2/+; Ptenf/f intact-veh	MIDN	Mus musculus midnolin (Midn), mRNA.	13.1382	3.85024e-05	0.000681842	NaN	0.14242	4.11675	1395.75	63.4517	5745.97	806.078
125	156	Nkx3.1CE2/+; Ptenf/f intact-veh	MYLC2B	Mus musculus myosin light chain, regulatory B (Mylc2b), mRNA.	13.1375	3.98625e-06	0.000333586	NaN	0.0147451	2.72048	5717.57	617.24	15554.5	1613.06
126	157	Nkx3.1CE2/+; Ptenf/f intact-veh	CASP2	NULL	13.1354	2.83685e-05	0.000608109	NaN	0.104935	3.26077	1041.54	57.7738	3396.23	431.433
127	158	Nkx3.1CE2/+; Ptenf/f intact-veh	MMP14	NULL	13.0724	4.64949e-05	0.000747759	NaN	0.171985	10.8772	553.137	14.068	6016.59	1023.54
128	159	Nkx3.1CE2/+; Ptenf/f intact-veh	LOC100044122	PREDICTED: Mus musculus similar to Potassium voltage-gated channel, subfamily Q, member 1 (LOC100044122), mRNA.	13.0396	2.2567e-05	0.00056015	NaN	0.0834752	4.04234	164.949	15.5793	666.781	91.6584
129	160	Nkx3.1CE2/+; Ptenf/f intact-veh	4930403C10RIK	NULL	13.0143	4.00831e-05	0.00069609	NaN	0.148267	5.7171	142.16	10.0799	812.743	125.406
130	162	Nkx3.1CE2/+; Ptenf/f intact-veh	9030024J15RIK	NULL	12.9693	9.44875e-06	0.000411187	NaN	0.0349509	3.40055	564.369	64.9972	1919.16	238.797
131	163	Nkx3.1CE2/+; Ptenf/f intact-veh	SRI	Mus musculus sorcin (Sri), transcript variant 1, mRNA.	12.9585	4.72712e-06	0.00035181	NaN	0.0174856	3.39851	1517.56	223.729	5157.47	610.966
132	164	Nkx3.1CE2/+; Ptenf/f intact-veh	GAPDH	Mus musculus glyceraldehyde-3-phosphate dehydrogenase (Gapdh), mRNA.	12.9528	8.21571e-06	0.000397777	NaN	0.0303899	2.78628	6437.41	581.966	17936.4	2012.8
133	165	Nkx3.1CE2/+; Ptenf/f intact-veh	ACPP	Mus musculus acid phosphatase, prostate (Acpp), transcript variant 1, mRNA.	12.9176	1.23632e-05	0.000437235	NaN	0.0457315	3.72742	194.531	23.2861	725.098	95.0658
134	167	Nkx3.1CE2/+; Ptenf/f intact-veh	PKM2	NULL	12.8136	3.40606e-05	0.00065	NaN	0.12599	3.51042	4351.39	258.293	15275.2	2056.03
135	169	Nkx3.1CE2/+; Ptenf/f intact-veh	PSMB10	Mus musculus proteasome (prosome, macropain) subunit, beta type 10 (Psmb10), mRNA.	12.7999	3.76013e-05	0.000681842	NaN	0.139087	6.5257	727.697	83.6538	4748.73	760.346
136	170	Nkx3.1CE2/+; Ptenf/f intact-veh	SPIRE2	Mus musculus spire homolog 2 (Drosophila) (Spire2), mRNA.	12.7317	4.52394e-05	0.000740139	NaN	0.167341	2.73853	143.214	3.69775	392.198	47.6164
137	171	Nkx3.1CE2/+; Ptenf/f intact-veh	9030624J02RIK	NULL	12.7068	1.15016e-05	0.000431707	NaN	0.0425444	2.45858	752.814	52.331	1850.85	198.309
138	172	Nkx3.1CE2/+; Ptenf/f intact-veh	LOC100040353	PREDICTED: Mus musculus similar to splicing coactivator subunit SRm300 (LOC100040353), mRNA.	12.7062	3.14034e-05	0.00064534	NaN	0.116161	3.25811	165.072	10.1641	537.824	70.4063
139	173	Nkx3.1CE2/+; Ptenf/f intact-veh	FXYD4	Mus musculus FXYD domain-containing ion transport regulator 4 (Fxyd4), mRNA.	12.7055	5.31612e-05	0.000792917	NaN	0.196643	44.1241	161.554	25.7992	7128.42	1342.64
140	174	Nkx3.1CE2/+; Ptenf/f intact-veh	GNG12	Mus musculus guanine nucleotide binding protein (G protein), gamma 12 (Gng12), mRNA.	12.6789	1.056e-05	0.000424581	NaN	0.0390615	3.509	743.919	92.4636	2610.41	336.05
141	175	Nkx3.1CE2/+; Ptenf/f intact-veh	LOC100047260	PREDICTED: Mus musculus similar to heparan sulfate 6-sulfotransferase 1 (LOC100047260), mRNA.	12.6702	3.22431e-05	0.000645814	NaN	0.119267	2.75762	287.979	50.4818	794.135	66.9216
142	176	Nkx3.1CE2/+; Ptenf/f intact-veh	KIF3B	NULL	12.6527	4.51249e-06	0.000347744	NaN	0.0166917	2.52412	356.218	40.9715	899.138	87.693
143	177	Nkx3.1CE2/+; Ptenf/f intact-veh	TIMP2	Mus musculus tissue inhibitor of metalloproteinase 2 (Timp2), mRNA.	12.6374	9.87251e-06	0.000414649	NaN	0.0365184	4.2963	2699.74	456.426	11598.9	1599.59
144	178	Nkx3.1CE2/+; Ptenf/f intact-veh	FBXW17	Mus musculus F-box and WD-40 domain protein 17 (Fbxw17), mRNA.	12.6325	5.46475e-05	0.000802147	NaN	0.202141	11.1463	219.844	8.53381	2450.44	432.354
145	179	Nkx3.1CE2/+; Ptenf/f intact-veh	DPP7	Mus musculus dipeptidylpeptidase 7 (Dpp7), mRNA.	12.6318	4.93032e-05	0.000754848	NaN	0.182372	6.49534	595.812	41.2385	3870	632.229
146	180	Nkx3.1CE2/+; Ptenf/f intact-veh	TMEM63A	Mus musculus transmembrane protein 63a (Tmem63a), mRNA.	12.63	3.69883e-05	0.000677325	NaN	0.13682	4.94561	479.201	44.9099	2369.94	361.152
147	181	Nkx3.1CE2/+; Ptenf/f intact-veh	2310014D11RIK	NULL	12.6093	2.73439e-05	0.000608109	NaN	0.101145	5.11172	210.471	27.562	1075.87	163.531
148	182	Nkx3.1CE2/+; Ptenf/f intact-veh	PARP14	Mus musculus poly (ADP-ribose) polymerase family, member 14 (Parp14), mRNA. XM_901644 XM_916789 XM_924484 XM_924488	12.5685	4.81027e-05	0.000754848	NaN	0.177932	10.9025	830.229	124.799	9051.58	1592.51
149	183	Nkx3.1CE2/+; Ptenf/f intact-veh	SIX1	Mus musculus sine oculis-related homeobox 1 homolog (Drosophila) (Six1), mRNA.	12.5619	4.9801e-05	0.000754974	NaN	0.184214	11.4994	210.466	30.0671	2420.24	428.79
150	185	Nkx3.1CE2/+; Ptenf/f intact-veh	TNNI2	Mus musculus troponin I, skeletal, fast 2 (Tnni2), mRNA.	12.5453	4.57529e-05	0.000740139	NaN	0.16924	8.23945	149.881	19.2892	1234.94	210.096
151	186	Nkx3.1CE2/+; Ptenf/f intact-veh	RELB	Mus musculus avian reticuloendotheliosis viral (v-rel) oncogene related B (Relb), mRNA.	12.5168	5.38325e-05	0.000798552	NaN	0.199127	5.97572	190.278	9.4927	1137.04	184.792
152	187	Nkx3.1CE2/+; Ptenf/f intact-veh	TRAF3	Mus musculus Tnf receptor-associated factor 3 (Traf3), transcript variant 1, mRNA.	12.5028	6.15203e-06	0.000361212	NaN	0.0227563	3.37266	907.03	180.064	3059.1	336.037
153	188	Nkx3.1CE2/+; Ptenf/f intact-veh	2310047D13RIK	NULL	12.4782	5.01067e-05	0.00075651	NaN	0.185345	9.88692	236.184	31.6031	2335.14	409.595
154	190	Nkx3.1CE2/+; Ptenf/f intact-veh	HS6ST1	Mus musculus heparan sulfate 6-O-sulfotransferase 1 (Hs6st1), mRNA.	12.4559	4.97934e-06	0.00035181	NaN	0.0184186	3.11988	698.222	107.595	2178.37	248.138
155	191	Nkx3.1CE2/+; Ptenf/f intact-veh	SLC40A1	Mus musculus solute carrier family 40 (iron-regulated transporter), member 1 (Slc40a1), mRNA.	12.4478	5.39708e-05	0.000798552	NaN	0.199638	21.7156	397.542	96.5294	8632.88	1614.8
156	192	Nkx3.1CE2/+; Ptenf/f intact-veh	BTC	Mus musculus betacellulin, epidermal groNkx3.1CE2/+h factor family member (Btc), mRNA.	12.4468	1.9063e-05	0.000514701	NaN	0.070514	4.01832	143.631	17.9552	577.155	81.4496
157	195	Nkx3.1CE2/+; Ptenf/f intact-veh	CFI	Mus musculus complement component factor i (Cfi), mRNA.	12.4162	6.1184e-06	0.000361212	NaN	0.022632	3.52582	172.256	28.1849	607.343	76.0185
158	197	Nkx3.1CE2/+; Ptenf/f intact-veh	ZDHHC3	Mus musculus zinc finger, DHHC domain containing 3 (Zdhhc3), mRNA.	12.3807	1.61462e-05	0.000481652	NaN	0.0597248	3.00486	158.334	14.4265	475.77	59.3978
159	198	Nkx3.1CE2/+; Ptenf/f intact-veh	GPRC5A	Mus musculus G protein-coupled receptor, family C, group 5, member A (Gprc5a), mRNA.	12.3408	5.71575e-05	0.00081006	NaN	0.211426	10.1599	163.71	16.2738	1663.28	296.754
160	199	Nkx3.1CE2/+; Ptenf/f intact-veh	MITD1	Mus musculus MIT, microtubule interacting and transport, domain containing 1 (Mitd1), mRNA. XM_978698	12.3384	1.6775e-05	0.000488587	NaN	0.0620506	5.24989	504.21	96.969	2647.04	402.697
161	201	Nkx3.1CE2/+; Ptenf/f intact-veh	PSME1	Mus musculus proteasome (prosome, macropain) 28 subunit, alpha (Psme1), mRNA.	12.3089	1.08671e-05	0.000427631	NaN	0.0401973	3.35079	4556.61	577.501	15268.2	1968.97
162	202	Nkx3.1CE2/+; Ptenf/f intact-veh	TMEM54	Mus musculus transmembrane protein 54 (Tmem54), mRNA.	12.2797	5.46012e-06	0.00035181	NaN	0.020197	3.0701	409.07	64.7303	1255.89	141.962
163	203	Nkx3.1CE2/+; Ptenf/f intact-veh	TMEM176B	Mus musculus transmembrane protein 176B (Tmem176b), mRNA.	12.2315	9.07267e-06	0.000410694	NaN	0.0335598	2.52977	5002.74	685.113	12655.8	1187.48
164	204	Nkx3.1CE2/+; Ptenf/f intact-veh	LOC674135	PREDICTED: Mus musculus similar to HLA-G protein (LOC674135), misc RNA.	12.1957	3.21328e-05	0.000645814	NaN	0.118859	5.96535	3048.93	505.046	18187.9	2955.56
165	205	Nkx3.1CE2/+; Ptenf/f intact-veh	MYO18A	Mus musculus myosin XVIIIa (Myo18a), mRNA.	12.1836	4.93209e-05	0.000754848	NaN	0.182438	3.61708	253.744	14.0316	917.814	132.027
166	206	Nkx3.1CE2/+; Ptenf/f intact-veh	LRRC26	Mus musculus leucine rich repeat containing 26 (Lrrc26), mRNA.	12.1827	5.7812e-05	0.000816208	NaN	0.213846	34.6418	331.894	158.339	11497.4	2233.79
167	208	Nkx3.1CE2/+; Ptenf/f intact-veh	PFKL	Mus musculus phosphofructokinase, liver, B-type (Pfkl), mRNA.	12.1462	5.45036e-05	0.000802147	NaN	0.201609	5.36551	1637	127.29	8783.37	1429.9
168	209	Nkx3.1CE2/+; Ptenf/f intact-veh	MYO1E	NULL	12.1428	8.94708e-06	0.000410694	NaN	0.0330952	3.4058	586.469	85.2503	1997.4	257.82
169	211	Nkx3.1CE2/+; Ptenf/f intact-veh	EMB	NULL	12.1176	8.14796e-06	0.000397777	NaN	0.0301393	5.17523	318.336	83.7679	1647.46	241.146
170	212	Nkx3.1CE2/+; Ptenf/f intact-veh	RNF135	Mus musculus ring finger protein 135 (Rnf135), mRNA.	12.0929	2.17689e-05	0.000551528	NaN	0.080523	2.79995	899.438	70.0577	2518.39	312.603
171	213	Nkx3.1CE2/+; Ptenf/f intact-veh	4732462B05RIK	NULL	12.0886	7.04562e-06	0.000377706	NaN	0.0260617	4.40335	408.607	117.683	1799.24	227.381
172	214	Nkx3.1CE2/+; Ptenf/f intact-veh	NFKB1	NULL	12.074	7.01647e-06	0.000377706	NaN	0.0259539	3.82191	811.207	155.834	3100.36	408.787
173	215	Nkx3.1CE2/+; Ptenf/f intact-veh	S100A16	Mus musculus S100 calcium binding protein A16 (S100a16), mRNA.	12.0703	1.58254e-05	0.000480227	NaN	0.0585382	4.15334	183.288	28.8629	761.256	109.959
174	216	Nkx3.1CE2/+; Ptenf/f intact-veh	AW112037	NULL	12.0683	8.69081e-06	0.000406928	NaN	0.0321473	3.93187	468.02	121.815	1840.19	218.836
175	218	Nkx3.1CE2/+; Ptenf/f intact-veh	SEMA3F	Mus musculus sema domain, immunoglobulin domain (Ig), short basic domain, secreted, (semaphorin) 3F (Sema3f), mRNA.	12.021	6.44988e-05	0.000864424	NaN	0.238581	9.12469	307.55	29.2824	2806.3	507.478
176	219	Nkx3.1CE2/+; Ptenf/f intact-veh	LOC100047963	PREDICTED: Mus musculus similar to ADIR1 (LOC100047963), mRNA.	12.0069	1.41572e-05	0.00045537	NaN	0.0523676	3.82186	357.213	53.4595	1365.22	191.239
177	220	Nkx3.1CE2/+; Ptenf/f intact-veh	TLR2	Mus musculus toll-like receptor 2 (Tlr2), mRNA.	11.9863	7.12855e-05	0.000900747	NaN	0.263685	23.9838	202.278	1.15954	4851.4	950.078
178	221	Nkx3.1CE2/+; Ptenf/f intact-veh	NOL3	Mus musculus nucleolar protein 3 (apoptosis repressor with CARD domain) (Nol3), mRNA.	11.9053	6.02785e-05	0.000838597	NaN	0.22297	3.392	208.753	9.06351	708.089	101.935
179	222	Nkx3.1CE2/+; Ptenf/f intact-veh	DGAT2	Mus musculus diacylglycerol O-acyltransferase 2 (Dgat2), mRNA.	11.8864	7.19787e-05	0.000900747	NaN	0.266249	24.0164	177.887	29.2275	4272.21	842.723
180	223	Nkx3.1CE2/+; Ptenf/f intact-veh	FAM84A	Mus musculus family with sequence similarity 84, member A (Fam84a), mRNA.	11.859	4.10245e-05	0.000702039	NaN	0.15175	4.06763	260.361	25.4448	1059.05	160.998
181	224	Nkx3.1CE2/+; Ptenf/f intact-veh	CX3CR1	NULL	11.8452	3.45021e-05	0.000654479	NaN	0.127623	3.05057	163.71	12.242	499.409	67.2262
182	227	Nkx3.1CE2/+; Ptenf/f intact-veh	SDC1	Mus musculus syndecan 1 (Sdc1), mRNA.	11.8003	6.60683e-05	0.000869704	NaN	0.244387	5.00319	161.475	10.3298	807.892	133.385
183	228	Nkx3.1CE2/+; Ptenf/f intact-veh	IFI35	Mus musculus interferon-induced protein 35 (Ifi35), mRNA.	11.7909	7.26354e-05	0.000900747	NaN	0.268678	4.93226	268.735	10.7061	1325.47	219.007
184	229	Nkx3.1CE2/+; Ptenf/f intact-veh	GOLM1	Mus musculus golgi membrane protein 1 (Golm1), transcript variant 2, mRNA.	11.7901	2.80747e-05	0.000608109	NaN	0.103848	4.6204	1822.44	277.083	8420.4	1313.58
185	231	Nkx3.1CE2/+; Ptenf/f intact-veh	1700041B20RIK	PREDICTED: Mus musculus RIKEN cDNA 1700041B20 gene, transcript variant 1 (1700041B20Rik), mRNA.	11.7534	5.63636e-05	0.00081006	NaN	0.208489	9.59508	275.507	56.1934	2643.51	487.068
186	232	Nkx3.1CE2/+; Ptenf/f intact-veh	1190003J15RIK	Mus musculus RIKEN cDNA 1190003J15 gene (1190003J15Rik), mRNA. XM_133915 XM_900078 XM_900080 XM_900083 XM_917938 XM_925372 XM_925374 XM_925375	11.7476	4.86842e-05	0.000754848	NaN	0.180083	11.0587	789.561	227.672	8731.49	1624.37
187	233	Nkx3.1CE2/+; Ptenf/f intact-veh	4732486I23RIK	NULL	11.7244	8.28031e-06	0.000397777	NaN	0.0306289	2.46118	175.937	22.1306	433.012	43.6474
188	234	Nkx3.1CE2/+; Ptenf/f intact-veh	FEM1C	NULL	11.7226	1.59654e-05	0.000480227	NaN	0.0590558	2.87151	281.496	28.8928	808.318	102.218
189	235	Nkx3.1CE2/+; Ptenf/f intact-veh	2810423O19RIK	NULL	11.707	6.92492e-05	0.000898781	NaN	0.256153	4.36965	701.039	37.0699	3063.3	491.473
190	236	Nkx3.1CE2/+; Ptenf/f intact-veh	TNIP1	Mus musculus TNFAIP3 interacting protein 1 (Tnip1), mRNA.	11.7041	6.38283e-05	0.000858549	NaN	0.236101	3.44696	667.419	32.2198	2300.57	338.742
191	237	Nkx3.1CE2/+; Ptenf/f intact-veh	PVRL2	Mus musculus poliovirus receptor-related 2 (Pvrl2), mRNA.	11.6438	2.43456e-05	0.0005812	NaN	0.0900543	2.64121	1399.97	108.426	3697.62	458.387
192	238	Nkx3.1CE2/+; Ptenf/f intact-veh	REG3B	Mus musculus regenerating islet-derived 3 beta (Reg3b), mRNA.	11.6428	8.20785e-05	0.000963836	NaN	0.303608	139.053	126.617	8.04218	17606.5	3677.51
193	239	Nkx3.1CE2/+; Ptenf/f intact-veh	FOXQ1	Mus musculus forkhead box Q1 (Foxq1), mRNA.	11.6317	4.71736e-05	0.000752134	NaN	0.174495	9.50933	870.159	232.712	8274.63	1524.16
194	240	Nkx3.1CE2/+; Ptenf/f intact-veh	AIM1	NULL	11.6222	1.4859e-05	0.000465793	NaN	0.0549636	3.60652	555.864	83.9888	2004.74	281.315
195	241	Nkx3.1CE2/+; Ptenf/f intact-veh	SESTD1	NULL	11.6221	8.26759e-05	0.000967779	NaN	0.305818	12.3481	182.158	3.36824	2249.3	435.648
196	242	Nkx3.1CE2/+; Ptenf/f intact-veh	5730469M10RIK	Mus musculus RIKEN cDNA 5730469M10 gene (5730469M10Rik), mRNA.	11.6135	9.32638e-06	0.000410694	NaN	0.0344983	2.43316	1003.24	100.365	2441.04	267.989
197	244	Nkx3.1CE2/+; Ptenf/f intact-veh	PHXR4	NULL	11.6115	5.63369e-05	0.00081006	NaN	0.20839	5.56138	282.251	33.7715	1569.71	267.361
198	245	Nkx3.1CE2/+; Ptenf/f intact-veh	SEMA4B	Mus musculus sema domain, immunoglobulin domain (Ig), transmembrane domain (TM) and short cytoplasmic domain, (semaphorin) 4B (Sema4b), mRNA.	11.5941	8.26831e-06	0.000397777	NaN	0.0305845	2.99331	1076.67	179.953	3222.81	375.261
199	246	Nkx3.1CE2/+; Ptenf/f intact-veh	AGPS	Mus musculus alkylglycerone phosphate synthase (Agps), mRNA.	11.5923	6.50584e-05	0.000868776	NaN	0.240651	4.85401	264.684	21.601	1284.78	213.374
200	248	Nkx3.1CE2/+; Ptenf/f intact-veh	MPRIP	Mus musculus myosin phosphatase Rho interacting protein (Mprip), transcript variant 1, mRNA.	11.5701	7.63612e-05	0.000921888	NaN	0.28246	3.19676	612.959	18.1621	1959.49	283.911
201	249	Nkx3.1CE2/+; Ptenf/f intact-veh	CSNK1E	Mus musculus casein kinase 1, epsilon (Csnk1e), mRNA.	11.5547	3.91286e-05	0.000685956	NaN	0.144737	4.97565	499.891	74.7474	2487.28	407.832
203	251	Nkx3.1CE2/+; Ptenf/f intact-veh	A130062D16RIK	NULL	11.5228	5.99861e-05	0.000838597	NaN	0.221889	3.4965	281.545	18.0032	984.42	147.23
204	252	Nkx3.1CE2/+; Ptenf/f intact-veh	TTYH3	Mus musculus tweety homolog 3 (Drosophila) (Ttyh3), mRNA.	11.5155	8.12735e-05	0.000957423	NaN	0.300631	4.90309	196.611	8.17371	964.004	162.824
205	253	Nkx3.1CE2/+; Ptenf/f intact-veh	PLD2	Mus musculus phospholipase D2 (Pld2), mRNA.	11.5011	1.2048e-05	0.000433187	NaN	0.0445654	2.87396	226.617	39.6931	651.288	70.918
206	254	Nkx3.1CE2/+; Ptenf/f intact-veh	SLC25A24	Mus musculus solute carrier family 25 (mitochondrial carrier, phosphate carrier), member 24 (Slc25a24), mRNA.	11.5001	7.37358e-05	0.000906141	NaN	0.272749	5.21687	170.685	12.4945	890.442	152.284
207	255	Nkx3.1CE2/+; Ptenf/f intact-veh	ZFP467	Mus musculus zinc finger protein 467 (Zfp467), transcript variant 3, mRNA.	11.4939	6.03046e-05	0.000838597	NaN	0.223067	4.7629	184.566	18.0201	879.071	145.797
208	257	Nkx3.1CE2/+; Ptenf/f intact-veh	EFNA4	Mus musculus ephrin A4 (Efna4), mRNA.	11.4742	8.58492e-06	0.000406928	NaN	0.0317556	2.63021	191.072	25.2171	502.561	56.1238
209	258	Nkx3.1CE2/+; Ptenf/f intact-veh	9530018I07RIK	NULL	11.4665	6.36996e-05	0.000858549	NaN	0.235625	4.77063	1010.88	93.2056	4822.55	803.511
210	259	Nkx3.1CE2/+; Ptenf/f intact-veh	DAB2IP	NULL	11.4042	4.83366e-05	0.000754848	NaN	0.178797	5.07921	567.414	79.5098	2882.01	484.268
211	260	Nkx3.1CE2/+; Ptenf/f intact-veh	TSC22D4	Mus musculus TSC22 domain family, member 4 (Tsc22d4), mRNA.	11.3964	5.86689e-05	0.000825157	NaN	0.217016	3.96632	408.07	34.6386	1618.54	255.519
212	261	Nkx3.1CE2/+; Ptenf/f intact-veh	6330403E01RIK	NULL	11.3821	1.72226e-05	0.000493847	NaN	0.0637063	2.52388	313.327	47.2156	790.798	78.1009
213	262	Nkx3.1CE2/+; Ptenf/f intact-veh	AA536749	NULL	11.3555	1.24114e-05	0.000437235	NaN	0.0459097	2.72021	2251.9	260.312	6125.63	750.137
214	263	Nkx3.1CE2/+; Ptenf/f intact-veh	SMO	Mus musculus smoothened homolog (Drosophila) (Smo), mRNA.	11.321	4.1631e-05	0.000706391	NaN	0.153993	4.81275	254.845	38.524	1226.5	203.053
215	264	Nkx3.1CE2/+; Ptenf/f intact-veh	2200002D01RIK	NULL	11.2962	8.67087e-05	0.000992989	NaN	0.320735	6.22998	187.536	12.9121	1168.34	211.894
216	265	Nkx3.1CE2/+; Ptenf/f intact-veh	IFIT3	Mus musculus interferon-induced protein with tetratricopeptide repeats 3 (Ifit3), mRNA.	11.2955	9.41489e-05	0.00102428	NaN	0.348257	54.6528	330.653	75.515	18071.1	3845.63
217	266	Nkx3.1CE2/+; Ptenf/f intact-veh	LOC621823	PREDICTED: Mus musculus similar to Proteasome activator complex subunit 2 (Proteasome activator 28-beta subunit) (PA28beta) (PA28b) (Activator of multicatalytic protease subunit 2) (11S regulator complex beta subunit) (REG-beta) (LOC621823), mRNA.	11.2934	1.58705e-05	0.000480227	NaN	0.0587049	2.68256	551.265	57.7266	1478.8	183.869
218	267	Nkx3.1CE2/+; Ptenf/f intact-veh	TMCO4	Mus musculus transmembrane and coiled-coil domains 4 (Tmco4), mRNA.	11.2524	4.81724e-05	0.000754848	NaN	0.17819	4.79778	298.831	41.8816	1433.72	239.846
219	268	Nkx3.1CE2/+; Ptenf/f intact-veh	ANO1	Mus musculus anoctamin 1, calcium activated chloride channel (Ano1), mRNA.	11.2518	2.51584e-05	0.000592745	NaN	0.093061	4.35353	755.41	133.096	3288.7	518.375
220	269	Nkx3.1CE2/+; Ptenf/f intact-veh	ARL6IP1	Mus musculus ADP-ribosylation factor-like 6 interacting protein 1 (Arl6ip1), mRNA.	11.2325	0.000254717	0.00160554	NaN	0.942197	2.40096	4405.84	766.659	10578.2	797.647
221	270	Nkx3.1CE2/+; Ptenf/f intact-veh	RAB27A	Mus musculus RAB27A, member RAS oncogene family (Rab27a), mRNA.	11.2274	9.60128e-05	0.00103242	NaN	0.355151	11.2222	430.742	26.7662	4833.89	959.889
222	271	Nkx3.1CE2/+; Ptenf/f intact-veh	BC006779	Mus musculus cDNA sequence BC006779 (BC006779), mRNA. XM_001001098 XM_001003843 XM_001003848 XM_001003853 XM_001003857 XM_994341 XM_994355 XM_994381 XM_994398	11.2235	9.50836e-05	0.0010284	NaN	0.351714	10.3498	242.115	17.3815	2505.83	493.437
223	272	Nkx3.1CE2/+; Ptenf/f intact-veh	CDH1	NULL	11.2224	4.38194e-05	0.000724549	NaN	0.162088	2.83148	2321.73	169.692	6573.94	896.561
224	274	Nkx3.1CE2/+; Ptenf/f intact-veh	BC004022	PREDICTED: Mus musculus cDNA sequence BC004022, transcript variant 1 (BC004022), mRNA.	11.2119	0.000476109	0.00219319	NaN	1	2.68015	637.046	138.395	1707.38	127.957
225	275	Nkx3.1CE2/+; Ptenf/f intact-veh	MVP	Mus musculus major vault protein (Mvp), mRNA.	11.204	3.0453e-05	0.00063284	NaN	0.112646	2.74832	1913.59	163.926	5259.16	693.72
226	277	Nkx3.1CE2/+; Ptenf/f intact-veh	FOXC1	Mus musculus forkhead box C1 (Foxc1), mRNA.	11.1767	7.03504e-05	0.000900747	NaN	0.260226	6.8079	159.985	24.4146	1089.16	200.691
227	278	Nkx3.1CE2/+; Ptenf/f intact-veh	LOC385644	NULL	11.1702	8.81392e-05	0.000998554	NaN	0.326027	2.53014	167.617	4.07855	424.096	55.9461
228	279	Nkx3.1CE2/+; Ptenf/f intact-veh	GALNT3	Mus musculus UDP-N-acetyl-alpha-D-galactosamine:polypeptide N-acetylgalactosaminyltransferase 3 (Galnt3), mRNA.	11.1667	8.60463e-05	0.000988464	NaN	0.318285	4.17894	132.403	7.32877	553.302	91.7432
229	280	Nkx3.1CE2/+; Ptenf/f intact-veh	LOC676389	PREDICTED: Mus musculus similar to Baculoviral IAP repeat-containing protein 1e (Neuronal apoptosis inhibitory protein 5) (LOC676389), misc RNA.	11.1543	9.85852e-05	0.00104789	NaN	0.364667	12.1733	129.178	9.96847	1572.53	316.646
230	281	Nkx3.1CE2/+; Ptenf/f intact-veh	RAPGEF6	Mus musculus Rap guanine nucleotide exchange factor (GEF) 6 (Rapgef6), mRNA. XM_899825 XM_899831 XM_899833 XM_899839 XM_899844 XM_899852 XM_899857 XM_899864 XM_899870 XM_914359 XM_923133 XM_923142 XM_923148 XM_923153 XM_923157 XM_923164 XM_923169 XM_923176 XM_923184 XM_923193 XM_923207	11.1427	2.07876e-05	0.000541501	NaN	0.0768932	2.41176	202.335	29.0765	487.984	47.4575
231	282	Nkx3.1CE2/+; Ptenf/f intact-veh	ITGB6	Mus musculus integrin beta 6 (Itgb6), mRNA.	11.1282	8.88144e-05	0.000998554	NaN	0.328524	7.10472	175.586	17.8228	1247.49	234.592
232	283	Nkx3.1CE2/+; Ptenf/f intact-veh	SLK	Mus musculus STE20-like kinase (yeast) (Slk), mRNA.	11.1197	2.79862e-05	0.000608109	NaN	0.103521	3.01375	548.252	57.7615	1652.29	229.073
233	284	Nkx3.1CE2/+; Ptenf/f intact-veh	PPM1M	Mus musculus protein phosphatase 1M (Ppm1m), transcript variant 2, mRNA.	11.1185	8.50089e-05	0.00098265	NaN	0.314448	3.86715	292.933	16.2109	1132.82	183.607
234	285	Nkx3.1CE2/+; Ptenf/f intact-veh	BCL2	Mus musculus B-cell leukemia/lymphoma 2 (Bcl2), transcript variant 1, mRNA.	11.1173	2.10836e-05	0.000545373	NaN	0.0779884	2.75785	226.946	23.4686	625.882	81.391
235	286	Nkx3.1CE2/+; Ptenf/f intact-veh	PTPLAD1	Mus musculus protein tyrosine phosphatase-like A domain containing 1 (Ptplad1), mRNA.	11.1108	1.11351e-05	0.000431707	NaN	0.0411886	3.15707	2835.73	540.468	8952.59	1110.99
236	287	Nkx3.1CE2/+; Ptenf/f intact-veh	PHCA	Mus musculus phytoceramidase, alkaline (Phca), mRNA.	11.1001	9.11814e-05	0.00100982	NaN	0.33728	11.0829	401.335	64.0215	4447.95	888.371
237	288	Nkx3.1CE2/+; Ptenf/f intact-veh	LOC100044475	PREDICTED: Mus musculus similar to SH2/SH3 adaptor protein (LOC100044475), mRNA.	11.0273	2.32803e-05	0.000566266	NaN	0.0861139	3.89387	653.828	110.023	2545.92	390.426
238	289	Nkx3.1CE2/+; Ptenf/f intact-veh	ANXA5	Mus musculus annexin A5 (Anxa5), mRNA.	11.0094	6.32703e-05	0.000858549	NaN	0.234037	3.84796	2466.38	232.203	9490.52	1527.92
239	290	Nkx3.1CE2/+; Ptenf/f intact-veh	CLMN	Mus musculus calmin (Clmn), transcript variant 1, mRNA.	10.999	0.000106782	0.00110951	NaN	0.394987	6.66664	147.419	4.17406	982.787	185.944
240	291	Nkx3.1CE2/+; Ptenf/f intact-veh	APLP2	Mus musculus amyloid beta (A4) precursor-like protein 2 (Aplp2), transcript variant 3, mRNA.	10.9669	3.65712e-05	0.000673019	NaN	0.135277	2.72538	4326.16	362.86	11790.4	1586.23
241	292	Nkx3.1CE2/+; Ptenf/f intact-veh	FAT1	Mus musculus FAT tumor suppressor homolog 1 (Drosophila) (Fat1), mRNA.	10.9654	2.76358e-05	0.000608109	NaN	0.102225	4.09242	1659.83	283.645	6792.71	1074.14
242	293	Nkx3.1CE2/+; Ptenf/f intact-veh	FAM129B	Mus musculus family with sequence similarity 129, member B (Fam129b), mRNA.	10.9624	3.29086e-05	0.000647494	NaN	0.121729	3.4968	2947.16	376.85	10305.6	1555.43
243	294	Nkx3.1CE2/+; Ptenf/f intact-veh	MARVELD3	Mus musculus MARVEL (membrane-associating) domain containing 3 (Marveld3), transcript variant 1, mRNA.	10.9585	1.17346e-05	0.000433187	NaN	0.0434062	2.43513	684.678	84.8571	1667.28	183.951
244	295	Nkx3.1CE2/+; Ptenf/f intact-veh	D230014K01RIK	Mus musculus RIKEN cDNA D230014K01 gene (D230014K01Rik), mRNA.	10.9485	1.82629e-05	0.000504137	NaN	0.0675544	4.25483	183.49	39.1484	780.718	121.607
245	296	Nkx3.1CE2/+; Ptenf/f intact-veh	FAM110A	Mus musculus family with sequence similarity 110, member A (Fam110a), transcript variant 1, mRNA.	10.9161	1.37373e-05	0.000449684	NaN	0.0508143	2.81005	415.228	56.3185	1166.81	148.657
246	297	Nkx3.1CE2/+; Ptenf/f intact-veh	PSMB9	Mus musculus proteasome (prosome, macropain) subunit, beta type 9 (large multifunctional peptidase 2) (Psmb9), mRNA.	10.8995	9.85327e-05	0.00104789	NaN	0.364472	9.79092	610.367	90.6411	5976.05	1199.02
247	298	Nkx3.1CE2/+; Ptenf/f intact-veh	LASP1	Mus musculus LIM and SH3 protein 1 (Lasp1), mRNA.	10.8911	7.97824e-05	0.000951984	NaN	0.295115	3.12457	5613.84	324.491	17540.9	2642.92
248	300	Nkx3.1CE2/+; Ptenf/f intact-veh	NAIP5	Mus musculus NLR family, apoptosis inhibitory protein 5 (Naip5), mRNA.	10.8743	0.000112742	0.0011522	NaN	0.417032	12.3431	141.648	8.38867	1748.37	361.726
249	302	Nkx3.1CE2/+; Ptenf/f intact-veh	TRIP6	Mus musculus thyroid hormone receptor interactor 6 (Trip6), mRNA.	10.8561	9.37572e-05	0.00102428	NaN	0.346808	3.22991	420.54	19.5592	1358.31	209.776
250	303	Nkx3.1CE2/+; Ptenf/f intact-veh	STAT1	Mus musculus signal transducer and activator of transcription 1 (Stat1), mRNA.	10.8303	0.000115701	0.00116318	NaN	0.427979	12.0398	377.809	15.6988	4548.73	943.081
251	304	Nkx3.1CE2/+; Ptenf/f intact-veh	CLIC1	NULL	10.829	6.31217e-05	0.000858549	NaN	0.233487	3.85779	227.055	23.6301	875.931	142.919
252	305	Nkx3.1CE2/+; Ptenf/f intact-veh	3110001A13RIK	Mus musculus RIKEN cDNA 3110001A13 gene (3110001A13Rik), mRNA.	10.8237	0.000114261	0.00116113	NaN	0.42265	5.57267	173.518	5.43964	966.961	179.397
253	306	Nkx3.1CE2/+; Ptenf/f intact-veh	PIGR	Mus musculus polymeric immunoglobulin receptor (Pigr), mRNA.	10.7991	8.32718e-05	0.000971679	NaN	0.308022	22.0125	517.824	298.747	11398.6	2431.59
254	307	Nkx3.1CE2/+; Ptenf/f intact-veh	EGFR	NULL	10.7667	6.74646e-05	0.000881807	NaN	0.249551	3.86575	566.312	57.6179	2189.22	360.116
255	308	Nkx3.1CE2/+; Ptenf/f intact-veh	LBCL1	NULL	10.7647	0.000116278	0.00116561	NaN	0.430114	8.28804	211.788	12.6213	1755.31	350.77
256	309	Nkx3.1CE2/+; Ptenf/f intact-veh	CDKN2B	Mus musculus cyclin-dependent kinase inhibitor 2B (p15, inhibits CDK4) (Cdkn2b), mRNA.	10.7495	0.000103466	0.00108113	NaN	0.38272	7.7265	186.443	22.9836	1440.55	283.92
257	310	Nkx3.1CE2/+; Ptenf/f intact-veh	LRRK1	Mus musculus leucine-rich repeat kinase 1 (Lrrk1), mRNA.	10.7404	1.38686e-05	0.000450001	NaN	0.0513001	2.55843	1345.79	169.847	3443.12	413.638
258	311	Nkx3.1CE2/+; Ptenf/f intact-veh	CALM3	Mus musculus calmodulin 3 (Calm3), mRNA.	10.7238	1.36153e-05	0.000449684	NaN	0.0503629	2.701	3446.54	521.295	9309.12	1117.9
259	312	Nkx3.1CE2/+; Ptenf/f intact-veh	HDAC7	Mus musculus histone deacetylase 7 (Hdac7), mRNA. XM_001003311 XM_001003316 XM_001004168 XM_001004172 XM_001004178 XM_001004180 XM_001004182 XM_001004187 XM_001004194 XM_001004198	10.7045	6.2651e-05	0.000858549	NaN	0.231746	2.70517	447.645	29.7211	1210.96	169.534
260	313	Nkx3.1CE2/+; Ptenf/f intact-veh	H2-K1	Mus musculus histocompatibility 2, K1, K region (H2-K1), transcript variant 1, mRNA.	10.704	0.000117066	0.00116706	NaN	0.433028	7.50167	1343.83	92.8625	10081	1995.07
261	314	Nkx3.1CE2/+; Ptenf/f intact-veh	TGIF1	Mus musculus TGFB-induced factor homeobox 1 (Tgif1), mRNA.	10.6998	9.69577e-05	0.00103956	NaN	0.358647	3.58957	533.025	31.8842	1913.33	312.758
262	315	Nkx3.1CE2/+; Ptenf/f intact-veh	EMP2	Mus musculus epithelial membrane protein 2 (Emp2), mRNA.	10.6688	0.000119081	0.00117461	NaN	0.440479	12.0635	276.519	32.2917	3335.77	700.901
263	316	Nkx3.1CE2/+; Ptenf/f intact-veh	LOC100046855	PREDICTED: Mus musculus similar to BKLF (LOC100046855), mRNA.	10.6659	1.69641e-05	0.000490236	NaN	0.0627503	4.66022	965.274	263.052	4498.39	721.096
264	317	Nkx3.1CE2/+; Ptenf/f intact-veh	HNRNPH1	Mus musculus heterogeneous nuclear ribonucleoprotein H1 (Hnrnph1), mRNA.	10.6649	1.75971e-05	0.000500704	NaN	0.0650915	3.03878	910.469	182.898	2766.71	338.91
265	318	Nkx3.1CE2/+; Ptenf/f intact-veh	ZDHHC13	Mus musculus zinc finger, DHHC domain containing 13 (Zdhhc13), mRNA.	10.643	8.99695e-05	0.0010024	NaN	0.332797	4.23036	641.715	57.4796	2714.68	470.12
266	319	Nkx3.1CE2/+; Ptenf/f intact-veh	RAC3	Mus musculus RAS-related C3 botulinum substrate 3 (Rac3), mRNA.	10.6332	3.82284e-05	0.000681842	NaN	0.141407	2.73503	162.524	15.0735	444.506	61.3609
267	320	Nkx3.1CE2/+; Ptenf/f intact-veh	HN1	Mus musculus hematological and neurological expressed sequence 1 (Hn1), mRNA.	10.632	1.45855e-05	0.000461125	NaN	0.0539517	2.87165	3721.83	632.947	10687.8	1332.06
268	321	Nkx3.1CE2/+; Ptenf/f intact-veh	IL13RA1	Mus musculus interleukin 13 receptor, alpha 1 (Il13ra1), mRNA.	10.624	1.64046e-05	0.000482577	NaN	0.0606806	2.69379	815.808	106.366	2197.62	280.843
269	322	Nkx3.1CE2/+; Ptenf/f intact-veh	ASPA	NULL	10.6219	5.67708e-05	0.00081006	NaN	0.209995	4.52369	153.361	23.4031	693.756	120.143
270	323	Nkx3.1CE2/+; Ptenf/f intact-veh	GIPC2	Mus musculus GIPC PDZ domain containing family, member 2 (Gipc2), mRNA.	10.6209	0.000120686	0.00118057	NaN	0.446419	9.46615	138.073	13.3995	1307.02	268.926
271	324	Nkx3.1CE2/+; Ptenf/f intact-veh	ATP2A3	Mus musculus ATPase, Ca++ transporting, ubiquitous (Atp2a3), mRNA.	10.6178	0.000110422	0.00113775	NaN	0.408451	15.0917	339.876	87.6301	5129.3	1097.93
272	325	Nkx3.1CE2/+; Ptenf/f intact-veh	LOC100044683	PREDICTED: Mus musculus similar to Leucine rich repeat containing 8 family, member E (LOC100044683), mRNA.	10.5597	0.000127061	0.0011965	NaN	0.469999	2.61577	169.078	2.43841	442.27	63.2775
273	326	Nkx3.1CE2/+; Ptenf/f intact-veh	TSPAN8	Mus musculus tetraspanin 8 (Tspan8), mRNA.	10.5479	7.8318e-05	0.000937535	NaN	0.289698	10.3192	1529.4	496.968	15782.1	3234.34
274	327	Nkx3.1CE2/+; Ptenf/f intact-veh	RNF213	Mus musculus ring finger protein 213 (Rnf213), mRNA.	10.5411	0.000122357	0.00118552	NaN	0.452599	7.38574	1823.49	158.784	13467.8	2696.51
275	329	Nkx3.1CE2/+; Ptenf/f intact-veh	SPINT1	Mus musculus serine protease inhibitor, Kunitz type 1 (Spint1), mRNA.	10.5008	4.92219e-05	0.000754848	NaN	0.182072	2.64981	6050.68	1142.62	16033.2	1676.65
276	330	Nkx3.1CE2/+; Ptenf/f intact-veh	PHLDA3	Mus musculus pleckstrin homology-like domain, family A, member 3 (Phlda3), mRNA.	10.4981	0.000118042	0.00116748	NaN	0.436638	4.09716	349.048	19.2556	1430.11	250.765
277	331	Nkx3.1CE2/+; Ptenf/f intact-veh	ABCD3	NULL	10.4918	0.000113071	0.0011522	NaN	0.418249	4.6807	1601.17	121.494	7494.59	1365.15
278	332	Nkx3.1CE2/+; Ptenf/f intact-veh	TCFCP2L1	Mus musculus transcription factor CP2-like 1 (Tcfcp2l1), mRNA.	10.481	0.000123314	0.00118778	NaN	0.45614	24.8942	461.404	168.991	11486.3	2565.48
279	333	Nkx3.1CE2/+; Ptenf/f intact-veh	TMEM131	Mus musculus transmembrane protein 131 (Tmem131), mRNA.	10.4791	7.22074e-05	0.000900747	NaN	0.267095	2.93642	419.076	31.5647	1230.58	184.362
281	336	Nkx3.1CE2/+; Ptenf/f intact-veh	CTNNB1	Mus musculus catenin (cadherin associated protein), beta 1 (Ctnnb1), mRNA.	10.4422	1.81574e-05	0.000504137	NaN	0.0671642	2.6805	6260.49	828.845	16781.2	2171.77
282	337	Nkx3.1CE2/+; Ptenf/f intact-veh	ANKRD50	Mus musculus ankrin repeat domain 50 (Ankrd50), mRNA.	10.4128	0.000134345	0.00123311	NaN	0.496944	2.87537	180.817	3.56371	519.916	79.6093
283	338	Nkx3.1CE2/+; Ptenf/f intact-veh	GALNT11	Mus musculus UDP-N-acetyl-alpha-D-galactosamine:polypeptide N-acetylgalactosaminyltransferase 11 (Galnt11), mRNA.	10.4111	0.000283363	0.00168993	NaN	1	2.66663	598.822	131.894	1596.84	142.632
284	340	Nkx3.1CE2/+; Ptenf/f intact-veh	NAPRT1	Mus musculus nicotinate phosphoribosyltransferase domain containing 1 (Naprt1), mRNA.	10.385	1.82364e-05	0.000504137	NaN	0.0674563	2.59327	749.458	115.676	1943.55	229.265
285	342	Nkx3.1CE2/+; Ptenf/f intact-veh	KLF5	Mus musculus Kruppel-like factor 5 (Klf5), mRNA.	10.3664	0.000137459	0.00124929	NaN	0.508462	32.8674	456.569	151.479	15006.2	3431.26
286	343	Nkx3.1CE2/+; Ptenf/f intact-veh	APOL7A	Mus musculus apolipoprotein L 7a (Apol7a), mRNA.	10.358	0.000129834	0.00120668	NaN	0.480258	8.63129	180.445	22.0131	1557.47	324.151
287	346	Nkx3.1CE2/+; Ptenf/f intact-veh	4933421H10RIK	NULL	10.3293	0.000100846	0.00105932	NaN	0.373028	4.79843	745.567	85.4295	3577.55	660.618
288	348	Nkx3.1CE2/+; Ptenf/f intact-veh	TRIM25	Mus musculus tripartite motif protein 25 (Trim25), mRNA.	10.3127	7.52029e-05	0.000918071	NaN	0.278175	3.9021	1599.28	190.057	6240.54	1069.13
289	349	Nkx3.1CE2/+; Ptenf/f intact-veh	LGALS4	Mus musculus lectin, galactose binding, soluble 4 (Lgals4), mRNA.	10.2909	0.000138	0.00125113	NaN	0.510463	12.3842	301.241	46.9275	3730.62	813.577
290	350	Nkx3.1CE2/+; Ptenf/f intact-veh	TMEM2	Mus musculus transmembrane protein 2 (Tmem2), transcript variant 1, mRNA.	10.2896	0.000132656	0.00122063	NaN	0.490695	3.06025	636.468	22.1683	1947.75	310.578
291	351	Nkx3.1CE2/+; Ptenf/f intact-veh	LOC100046608	PREDICTED: Mus musculus similar to Bcl2-like protein (LOC100046608), mRNA.	10.2896	3.1692e-05	0.000645814	NaN	0.117229	3.40791	221.784	34.8281	755.819	117.201
292	352	Nkx3.1CE2/+; Ptenf/f intact-veh	LRRFIP1	Mus musculus leucine rich repeat (in FLII) interacting protein 1 (Lrrfip1), mRNA.	10.2753	5.61222e-05	0.00081006	NaN	0.207596	3.64306	458.955	60.9947	1672	276.009
293	353	Nkx3.1CE2/+; Ptenf/f intact-veh	KIT	NULL	10.2693	3.56549e-05	0.000662881	NaN	0.131888	3.38203	237.398	35.349	802.886	125.278
294	354	Nkx3.1CE2/+; Ptenf/f intact-veh	DBNDD2	Mus musculus dysbindin (dystrobrevin binding protein 1) domain containing 2 (Dbndd2), transcript variant 2, mRNA.	10.2671	3.51318e-05	0.000659902	NaN	0.129952	2.67581	2319.33	244.673	6206.09	860.312
295	355	Nkx3.1CE2/+; Ptenf/f intact-veh	ATL2	Mus musculus atlastin GTPase 2 (Atl2), transcript variant 1, mRNA.	10.2648	2.76559e-05	0.000608109	NaN	0.102299	2.81467	364.626	70.7336	1026.3	122.166
296	356	Nkx3.1CE2/+; Ptenf/f intact-veh	PPP1R9A	Mus musculus protein phosphatase 1, regulatory (inhibitor) subunit 9A (Ppp1r9a), mRNA.	10.2642	4.9481e-05	0.000754848	NaN	0.18303	4.42527	562.754	103.967	2490.34	435.878
297	357	Nkx3.1CE2/+; Ptenf/f intact-veh	GPX8	Mus musculus glutathione peroxidase 8 (putative) (Gpx8), mRNA.	10.2569	4.70638e-05	0.000752134	NaN	0.174089	3.62443	1109.01	161.315	4019.53	656.568
298	358	Nkx3.1CE2/+; Ptenf/f intact-veh	FAR1	Mus musculus fatty acyl CoA reductase 1 (Far1), transcript variant 2, mRNA.	10.2232	2.68239e-05	0.000608109	NaN	0.0992216	2.78597	213.022	27.2114	593.472	82.6354
299	359	Nkx3.1CE2/+; Ptenf/f intact-veh	A630097D09RIK	NULL	10.2224	1.93019e-05	0.000517374	NaN	0.0713976	2.42466	294.58	35.5639	714.256	87.0824
300	360	Nkx3.1CE2/+; Ptenf/f intact-veh	C2	Mus musculus complement component 2 (within H-2S) (C2), mRNA.	10.2104	0.00014964	0.00129013	NaN	0.553518	12.3777	436.967	45.2951	5408.63	1190.98
301	361	Nkx3.1CE2/+; Ptenf/f intact-veh	LOC332300	NULL	10.2085	0.00012459	0.00118778	NaN	0.460858	5.0278	180.434	16.9866	907.184	172.718
302	362	Nkx3.1CE2/+; Ptenf/f intact-veh	LAMC2	NULL	10.2048	2.43541e-05	0.0005812	NaN	0.090086	3.98913	648.539	145.562	2587.11	417.307
303	363	Nkx3.1CE2/+; Ptenf/f intact-veh	CYP4V3	Mus musculus cytochrome P450, family 4, subfamily v, polypeptide 3 (Cyp4v3), mRNA.	10.1874	0.000152566	0.00129727	NaN	0.564341	3.87683	220.07	4.98733	853.173	152.062
304	364	Nkx3.1CE2/+; Ptenf/f intact-veh	CX3CL1	Mus musculus chemokine (C-X3-C motif) ligand 1 (Cx3cl1), mRNA.	10.1856	0.000140711	0.00126332	NaN	0.520489	8.34188	295.189	35.5095	2462.43	518.766
305	365	Nkx3.1CE2/+; Ptenf/f intact-veh	L3MBTL3	Mus musculus l(3)mbt-like 3 (Drosophila) (L3mbtl3), mRNA.	10.1526	2.04034e-05	0.000535673	NaN	0.0754721	3.03327	310.965	61.5439	943.241	125.281
306	366	Nkx3.1CE2/+; Ptenf/f intact-veh	2610035D17RIK	PREDICTED: Mus musculus RIKEN cDNA 2610035D17 gene (2610035D17Rik), mRNA.	10.1342	0.000100672	0.00105932	NaN	0.372386	5.53129	248.302	39.0669	1373.43	266.278
307	367	Nkx3.1CE2/+; Ptenf/f intact-veh	PAFAH1B3	Mus musculus platelet-activating factor acetylhydrolase, isoform 1b, alpha1 subunit (Pafah1b3), mRNA.	10.129	7.23009e-05	0.000900747	NaN	0.267441	2.77484	1474.04	120.199	4090.24	609.405
308	369	Nkx3.1CE2/+; Ptenf/f intact-veh	PLXNB2	PREDICTED: Mus musculus plexin B2, transcript variant 13 (Plxnb2), mRNA.	10.1214	9.26991e-05	0.00102052	NaN	0.342894	4.09342	1122.54	132.053	4595.03	819.368
309	370	Nkx3.1CE2/+; Ptenf/f intact-veh	MAP3K14	NULL	10.1069	4.55699e-05	0.000740139	NaN	0.168563	2.47561	199.189	17.4716	493.114	66.8129
310	371	Nkx3.1CE2/+; Ptenf/f intact-veh	BRI3	NULL	10.0933	2.29679e-05	0.000562639	NaN	0.0849584	2.97211	3970.2	633.18	11799.9	1675.91
311	372	Nkx3.1CE2/+; Ptenf/f intact-veh	CBARA1	NULL	10.086	2.02309e-05	0.000535673	NaN	0.0748339	3.00109	333.264	61.6653	1000.16	136.478
312	373	Nkx3.1CE2/+; Ptenf/f intact-veh	TRAF4	Mus musculus Tnf receptor associated factor 4 (Traf4), mRNA.	10.0757	9.33451e-05	0.00102428	NaN	0.345283	4.8805	217.172	32.694	1059.91	199.591
313	374	Nkx3.1CE2/+; Ptenf/f intact-veh	PHC1	Mus musculus polyhomeotic-like 1 (Drosophila) (Phc1), transcript variant 1, mRNA.	10.0727	2.63072e-05	0.000608109	NaN	0.0973102	2.74634	446.052	81.9887	1225.01	149.796
314	375	Nkx3.1CE2/+; Ptenf/f intact-veh	E030040G24RIK	NULL	10.0719	0.000161892	0.00133699	NaN	0.59884	6.12044	190.962	7.05739	1168.77	237.593
315	376	Nkx3.1CE2/+; Ptenf/f intact-veh	PLEKHG3	Mus musculus pleckstrin homology domain containing, family G (with RhoGef domain) member 3 (Plekhg3), mRNA.	10.0687	2.81327e-05	0.000608109	NaN	0.104063	3.02776	1760.43	264.657	5330.16	783.645
316	378	Nkx3.1CE2/+; Ptenf/f intact-veh	EPHB6	Mus musculus Eph receptor B6 (Ephb6), mRNA.	10.0513	0.000164882	0.00133699	NaN	0.6099	2.68505	135.92	1.25896	364.952	55.7861
317	379	Nkx3.1CE2/+; Ptenf/f intact-veh	SDCBP	Mus musculus syndecan binding protein (Sdcbp), transcript variant 1, mRNA.	10.0215	2.75247e-05	0.000608109	NaN	0.101814	2.4024	4322.02	461.976	10383.2	1329.67
318	380	Nkx3.1CE2/+; Ptenf/f intact-veh	TSPAN3	Mus musculus tetraspanin 3 (Tspan3), mRNA.	10.0196	3.40903e-05	0.00065	NaN	0.1261	4.40281	1199.91	283.93	5282.97	913.862
319	381	Nkx3.1CE2/+; Ptenf/f intact-veh	ZFP750	Mus musculus zinc finger protein 750 (Zfp750), mRNA.	10.0123	0.000165172	0.00133699	NaN	0.610971	11.2248	195.379	17.3279	2193.09	488.12
320	382	Nkx3.1CE2/+; Ptenf/f intact-veh	PLAGL2	Mus musculus pleiomorphic adenoma gene-like 2 (Plagl2), mRNA.	10.006	0.000285036	0.00168993	NaN	1	2.56611	999.172	212.702	2563.99	237.187
321	384	Nkx3.1CE2/+; Ptenf/f intact-veh	B4GALT6	Mus musculus UDP-Gal:betaGlcNAc beta 1,4-galactosyltransferase, polypeptide 6 (B4galt6), mRNA.	9.99375	0.000101092	0.00105932	NaN	0.373939	3.02233	156.473	11.9567	472.915	75.6948
322	385	Nkx3.1CE2/+; Ptenf/f intact-veh	MOBKL2B	Mus musculus MOB1, Mps One Binder kinase activator-like 2B (yeast) (Mobkl2b), mRNA.	9.98067	0.00015916	0.00132598	NaN	0.588734	2.91786	149.086	4.19734	435.013	69.9216
323	386	Nkx3.1CE2/+; Ptenf/f intact-veh	CELSR2	Mus musculus cadherin, EGF LAG seven-pass G-type receptor 2 (flamingo homolog, Drosophila) (Celsr2), transcript variant 1, mRNA.	9.97531	0.00011572	0.00116318	NaN	0.428048	6.13548	222.88	37.719	1367.48	275.953
324	387	Nkx3.1CE2/+; Ptenf/f intact-veh	EVPL	Mus musculus envoplakin (Evpl), mRNA.	9.97216	0.000158911	0.00132598	NaN	0.587811	6.86	217.665	19.3939	1493.18	312.106
325	388	Nkx3.1CE2/+; Ptenf/f intact-veh	UBE2L6	NULL	9.95981	0.000165904	0.00133699	NaN	0.613677	6.24024	147.932	8.91242	923.133	190.234
326	389	Nkx3.1CE2/+; Ptenf/f intact-veh	PRDX5	Mus musculus peroxiredoxin 5 (Prdx5), nuclear gene encoding mitochondrial protein, mRNA.	9.95844	4.94801e-05	0.000754848	NaN	0.183027	2.67224	4940.08	499.379	13201.1	1905.3
327	392	Nkx3.1CE2/+; Ptenf/f intact-veh	RASA2	Mus musculus RAS p21 protein activator 2 (Rasa2), mRNA.	9.94188	0.000145095	0.00128093	NaN	0.536708	4.19412	262.523	19.1121	1101.05	204.822
328	393	Nkx3.1CE2/+; Ptenf/f intact-veh	IGH-VJ558	PREDICTED: Mus musculus immunoglobulin heavy chain (J558 family) (Igh-VJ558), mRNA.	9.92188	4.24247e-05	0.000710086	NaN	0.156929	16.9891	1082.11	1135.35	18384.1	3958.21
329	394	Nkx3.1CE2/+; Ptenf/f intact-veh	OPLAH	Mus musculus 5-oxoprolinase (ATP-hydrolysing) (Oplah), mRNA.	9.90525	8.85915e-05	0.000998554	NaN	0.3277	2.72266	183.828	14.0469	500.501	75.7492
330	395	Nkx3.1CE2/+; Ptenf/f intact-veh	TANC1	Mus musculus tetratricopeptide repeat, ankyrin repeat and coiled-coil containing 1 (Tanc1), mRNA.	9.89867	8.93738e-05	0.000998773	NaN	0.330594	3.05597	243.506	22.1357	744.148	119.867
331	396	Nkx3.1CE2/+; Ptenf/f intact-veh	DTX3L	Mus musculus deltex 3-like (Drosophila) (Dtx3l), mRNA.	9.88827	4.95885e-05	0.000754848	NaN	0.183428	6.36531	671.652	223.382	4275.27	834.908
332	397	Nkx3.1CE2/+; Ptenf/f intact-veh	IGSF3	NULL	9.85631	8.75352e-05	0.000996286	NaN	0.323793	4.3152	277.022	42.1069	1195.41	220.332
333	398	Nkx3.1CE2/+; Ptenf/f intact-veh	KLF3	NULL	9.84181	0.000140324	0.00126292	NaN	0.51906	4.21734	198.911	17.6971	838.873	157.299
334	399	Nkx3.1CE2/+; Ptenf/f intact-veh	ZNFX1	Mus musculus zinc finger, NFX1-type containing 1 (Znfx1), mRNA.	9.83183	0.000125839	0.00119354	NaN	0.46548	5.97732	679.935	111.749	4064.19	828.206
335	400	Nkx3.1CE2/+; Ptenf/f intact-veh	NAPEPLD	Mus musculus N-acyl phosphatidylethanolamine phospholipase D (Napepld), mRNA.	9.82806	0.000168028	0.00134997	NaN	0.621536	5.15691	136.728	9.50856	705.095	141.017
336	401	Nkx3.1CE2/+; Ptenf/f intact-veh	ICMT	Mus musculus isoprenylcysteine carboxyl methyltransferase (Icmt), mRNA.	9.81898	3.01876e-05	0.00063284	NaN	0.111664	2.57234	760.75	94.6894	1956.9	266.664
337	402	Nkx3.1CE2/+; Ptenf/f intact-veh	IGSF4A	NULL	9.81451	0.000157018	0.00132002	NaN	0.580811	7.99026	436.784	67.6023	3490.02	756.001
338	403	Nkx3.1CE2/+; Ptenf/f intact-veh	LOC626152	PREDICTED: Mus musculus similar to epiplakin (LOC626152), misc RNA.	9.80695	0.000182882	0.00138778	NaN	0.676482	14.3333	145.467	16.5276	2085.01	483.877
339	404	Nkx3.1CE2/+; Ptenf/f intact-veh	GNA14	Mus musculus guanine nucleotide binding protein, alpha 14 (Gna14), mRNA.	9.78862	8.08775e-05	0.000955801	NaN	0.299166	3.8076	233.717	32.7434	889.9	157.538
340	405	Nkx3.1CE2/+; Ptenf/f intact-veh	SPECC1	Mus musculus sperm antigen with calponin homology and coiled-coil domains 1 (Specc1), mRNA.	9.78506	0.000176071	0.00137693	NaN	0.651286	9.08927	178.271	20.9215	1620.35	359.781
341	406	Nkx3.1CE2/+; Ptenf/f intact-veh	DYRK3	Mus musculus dual-specificity tyrosine-(Y)-phosphorylation regulated kinase 3 (Dyrk3), mRNA.	9.77762	2.58909e-05	0.000606143	NaN	0.0957705	2.78685	190.585	34.2443	531.132	70.2361
342	407	Nkx3.1CE2/+; Ptenf/f intact-veh	CANT1	NULL	9.76271	8.93456e-05	0.000998773	NaN	0.330489	2.62412	2160.86	440.409	5670.35	622.441
343	408	Nkx3.1CE2/+; Ptenf/f intact-veh	PLSCR1	Mus musculus phospholipid scramblase 1 (Plscr1), mRNA.	9.73631	8.42048e-05	0.000976407	NaN	0.311474	5.42151	1753.89	386.386	9508.74	1872.9
344	409	Nkx3.1CE2/+; Ptenf/f intact-veh	LPCAT4	Mus musculus lysophosphatidylcholine acyltransferase 4 (Lpcat4), mRNA.	9.73164	0.000189183	0.00141009	NaN	0.699789	6.36279	182.222	8.89671	1159.44	245.647
345	410	Nkx3.1CE2/+; Ptenf/f intact-veh	RHBDF1	Mus musculus rhomboid family 1 (Drosophila) (Rhbdf1), mRNA.	9.7277	2.81244e-05	0.000608109	NaN	0.104032	2.6619	2220.57	316.424	5910.95	814.415
346	411	Nkx3.1CE2/+; Ptenf/f intact-veh	DDX58	Mus musculus DEAD (Asp-Glu-Ala-Asp) box polypeptide 58 (Ddx58), mRNA.	9.72685	0.000161247	0.00133699	NaN	0.596452	6.16271	181.291	21.9545	1117.25	233.645
347	412	Nkx3.1CE2/+; Ptenf/f intact-veh	RHOD	Mus musculus ras homolog gene family, member D (Rhod), mRNA.	9.71867	0.000134983	0.0012359	NaN	0.499302	4.08721	271.559	27.594	1109.92	207.665
348	413	Nkx3.1CE2/+; Ptenf/f intact-veh	RTP4	Mus musculus receptor transporter protein 4 (Rtp4), mRNA.	9.71692	0.000186478	0.00140485	NaN	0.689784	4.60759	148.161	6.44825	682.666	134.432
349	414	Nkx3.1CE2/+; Ptenf/f intact-veh	USP6NL	Mus musculus USP6 N-terminal like (Usp6nl), transcript variant 1, mRNA.	9.71679	3.9336e-05	0.000686338	NaN	0.145504	3.52927	262.933	48.6399	927.962	152.884
350	415	Nkx3.1CE2/+; Ptenf/f intact-veh	WNT4	Mus musculus wingless-related MMTV integration site 4 (Wnt4), mRNA.	9.69385	0.000188182	0.00140797	NaN	0.696084	13.4917	206.595	31.9356	2787.32	650.545
351	416	Nkx3.1CE2/+; Ptenf/f intact-veh	NAT5	Mus musculus N-acetyltransferase 5 (ARD1 homolog, S. cerevisiae) (Nat5), mRNA.	9.6905	3.80898e-05	0.000681842	NaN	0.140894	3.01047	1329.25	300.468	4001.69	525.129
353	418	Nkx3.1CE2/+; Ptenf/f intact-veh	OAS2	Mus musculus 2'-5' oligoadenylate synthetase 2 (Oas2), mRNA.	9.68813	0.000198863	0.00143765	NaN	0.735596	56.8693	138.943	9.18334	7901.61	1962.62
354	419	Nkx3.1CE2/+; Ptenf/f intact-veh	CHAF1B	Mus musculus chromatin assembly factor 1, subunit B (p60) (Chaf1b), mRNA.	9.68424	0.00012128	0.00118057	NaN	0.448616	2.61142	188.101	11.608	491.211	74.8892
355	420	Nkx3.1CE2/+; Ptenf/f intact-veh	ANPEP	Mus musculus alanyl (membrane) aminopeptidase (Anpep), mRNA.	9.67963	0.000198757	0.00143765	NaN	0.7352	21.3531	190.835	15.1194	4074.92	982.659
356	421	Nkx3.1CE2/+; Ptenf/f intact-veh	DHX58	Mus musculus DEXH (Asp-Glu-X-His) box polypeptide 58 (Dhx58), mRNA.	9.67649	0.000196894	0.00143765	NaN	0.72831	18.1242	167.748	19.7097	3040.3	726.618
357	422	Nkx3.1CE2/+; Ptenf/f intact-veh	WNK4	Mus musculus WNK lysine deficient protein kinase 4 (Wnk4), mRNA.	9.64512	0.000172263	0.0013636	NaN	0.637201	6.64896	368.122	45.9035	2447.63	524.109
358	423	Nkx3.1CE2/+; Ptenf/f intact-veh	A130039H09RIK	NULL	9.63506	0.000170238	0.00135713	NaN	0.629709	2.52806	145.699	5.16742	368.336	56.1266
359	424	Nkx3.1CE2/+; Ptenf/f intact-veh	SBK	NULL	9.63432	9.54105e-05	0.00102893	NaN	0.352924	3.54029	195.346	23.8926	691.582	121.557
360	425	Nkx3.1CE2/+; Ptenf/f intact-veh	NRARP	Mus musculus Notch-regulated ankyrin repeat protein (Nrarp), mRNA.	9.63065	0.000200548	0.00143765	NaN	0.741827	5.58184	164.16	5.84781	916.317	191.127
361	427	Nkx3.1CE2/+; Ptenf/f intact-veh	ELF1	Mus musculus E74-like factor 1 (Elf1), mRNA.	9.61082	0.000154123	0.0013016	NaN	0.570101	2.65447	745.261	36.5342	1978.28	309.979
362	428	Nkx3.1CE2/+; Ptenf/f intact-veh	TGFBR2	Mus musculus transforming groNkx3.1CE2/+h factor, beta receptor II (Tgfbr2), transcript variant 1, mRNA.	9.61007	0.000165861	0.00133699	NaN	0.613518	8.24282	1176.74	218.64	9699.69	2150.28
363	430	Nkx3.1CE2/+; Ptenf/f intact-veh	IRF1	Mus musculus interferon regulatory factor 1 (Irf1), mRNA.	9.5654	7.23317e-05	0.000900747	NaN	0.267555	4.18589	1945.1	362.921	8141.97	1501.59
364	431	Nkx3.1CE2/+; Ptenf/f intact-veh	TRIM21	Mus musculus tripartite motif-containing 21 (Trim21), transcript variant 1, mRNA.	9.56345	9.48547e-05	0.0010284	NaN	0.350868	3.59197	393.864	51.0853	1414.75	251.3
365	433	Nkx3.1CE2/+; Ptenf/f intact-veh	PPL	Mus musculus periplakin (Ppl), mRNA.	9.55416	0.00011459	0.00116129	NaN	0.42387	5.87863	438.701	93.534	2578.96	532.536
366	434	Nkx3.1CE2/+; Ptenf/f intact-veh	WNT7B	Mus musculus wingless-related MMTV integration site 7B (Wnt7b), mRNA.	9.55381	8.03654e-05	0.000952794	NaN	0.297272	2.36529	581.08	99.3763	1374.42	147.044
367	435	Nkx3.1CE2/+; Ptenf/f intact-veh	FAM102A	Mus musculus family with sequence similarity 102, member A (Fam102a), mRNA.	9.52328	7.29902e-05	0.000900747	NaN	0.269991	3.50495	2088.96	310.403	7321.7	1272.32
368	436	Nkx3.1CE2/+; Ptenf/f intact-veh	LRCH1	Mus musculus leucine-rich repeats and calponin homology (CH) domain containing 1 (Lrch1), mRNA.	9.52312	3.11184e-05	0.000643056	NaN	0.115107	2.43004	358.901	53.3898	872.144	108.29
369	437	Nkx3.1CE2/+; Ptenf/f intact-veh	PLEKHB2	Mus musculus pleckstrin homology domain containing, family B (evectins) member 2 (Plekhb2), mRNA.	9.51673	0.000208362	0.00147086	NaN	0.770733	5.7944	1009.61	52.8878	5850.11	1243.64
370	438	Nkx3.1CE2/+; Ptenf/f intact-veh	EFTUD2	Mus musculus elongation factor Tu GTP binding domain containing 2 (Eftud2), mRNA.	9.50662	6.07631e-05	0.000838667	NaN	0.224763	2.40292	532.661	48.8221	1279.94	179.74
371	439	Nkx3.1CE2/+; Ptenf/f intact-veh	SNRK	Mus musculus SNF related kinase (Snrk), mRNA.	9.50062	3.51448e-05	0.000659902	NaN	0.130001	2.56192	929.858	158.374	2382.22	300.084
372	440	Nkx3.1CE2/+; Ptenf/f intact-veh	ZFP429	Mus musculus zinc finger protein 429 (Zfp429), mRNA. XM_985158 XM_985191 XM_985227 XM_985266 XM_990399	9.4996	3.22994e-05	0.000645814	NaN	0.119476	2.51192	173.975	27.7463	437.012	55.3213
373	442	Nkx3.1CE2/+; Ptenf/f intact-veh	EML4	Mus musculus echinoderm microtubule associated protein like 4 (Eml4), mRNA.	9.48494	0.000112909	0.0011522	NaN	0.417651	3.63789	553.37	67.1028	2013.1	364.835
374	443	Nkx3.1CE2/+; Ptenf/f intact-veh	H3F3A	Mus musculus H3 histone, family 3A (H3f3a), mRNA.	9.47563	3.25147e-05	0.000646623	NaN	0.120272	3.26467	3739.49	758.461	12208.2	1908.42
375	444	Nkx3.1CE2/+; Ptenf/f intact-veh	CARD10	Mus musculus caspase recruitment domain family, member 10 (Card10), mRNA.	9.47141	0.000193339	0.00143032	NaN	0.715161	5.20004	438.18	37.8955	2278.56	472.93
376	445	Nkx3.1CE2/+; Ptenf/f intact-veh	STEAP2	Mus musculus six transmembrane epithelial antigen of prostate 2 (Steap2), mRNA. XM_900299 XM_905527 XM_919398 XM_919422 XM_919426 XM_919434 XM_919444 XM_979606 XM_979649 XM_979723 XM_979751 XM_979777 XM_979804	9.46894	0.000121015	0.00118057	NaN	0.447633	2.66476	205.007	14.9592	546.294	85.7144
377	446	Nkx3.1CE2/+; Ptenf/f intact-veh	9130213B05RIK	Mus musculus RIKEN cDNA 9130213B05 gene (9130213B05Rik), mRNA.	9.46318	0.000181008	0.00138778	NaN	0.66955	11.2546	402.38	104.726	4528.63	1057.74
378	447	Nkx3.1CE2/+; Ptenf/f intact-veh	A330042I21RIK	NULL	9.4579	0.000217101	0.0015095	NaN	0.803056	10.2863	153.31	13.1896	1576.99	368.244
379	448	Nkx3.1CE2/+; Ptenf/f intact-veh	SALL3	Mus musculus sal-like 3 (Drosophila) (Sall3), mRNA.	9.44997	0.000123649	0.00118778	NaN	0.457378	4.45766	442.841	66.6181	1974.03	385.55
380	449	Nkx3.1CE2/+; Ptenf/f intact-veh	CKMT1	NULL	9.43384	0.000225207	0.00153133	NaN	0.833041	36.9817	238.012	26.8493	8802.08	2223.33
381	451	Nkx3.1CE2/+; Ptenf/f intact-veh	BLVRA	NULL	9.42792	0.000130954	0.00121403	NaN	0.484399	3.07397	795.495	69.0708	2445.33	417.369
382	452	Nkx3.1CE2/+; Ptenf/f intact-veh	AIM1L	PREDICTED: Mus musculus absent in melanoma 1-like, transcript variant 1 (Aim1l), mRNA.	9.42751	0.000220032	0.00151847	NaN	0.813899	6.67355	175.922	9.61051	1174.02	258.974
383	453	Nkx3.1CE2/+; Ptenf/f intact-veh	FBXL10	Mus musculus F-box and leucine-rich repeat protein 10 (Fbxl10), transcript variant 3, mRNA.	9.4249	0.000178651	0.00138279	NaN	0.660829	2.99461	570.476	31.2612	1708.35	292.406
384	455	Nkx3.1CE2/+; Ptenf/f intact-veh	4930572J05RIK	Mus musculus RIKEN cDNA 4930572J05 gene (4930572J05Rik), mRNA.	9.40978	0.000163633	0.00133699	NaN	0.605277	4.17899	965.286	100.129	4033.92	786.154
385	456	Nkx3.1CE2/+; Ptenf/f intact-veh	TMIE	Mus musculus transmembrane inner ear (Tmie), mRNA.	9.40081	0.000223959	0.00153129	NaN	0.828426	5.49497	130.865	5.27204	719.102	153.09
386	457	Nkx3.1CE2/+; Ptenf/f intact-veh	BC023151	NULL	9.39608	0.000200516	0.00143765	NaN	0.741709	2.63143	139.994	4.78535	368.386	59.1541
387	458	Nkx3.1CE2/+; Ptenf/f intact-veh	RNF130	Mus musculus ring finger protein 130 (Rnf130), mRNA.	9.39283	0.000147901	0.00128825	NaN	0.547084	6.69141	1237.47	266.145	8280.39	1797.69
388	459	Nkx3.1CE2/+; Ptenf/f intact-veh	ENC1	Mus musculus ectodermal-neural cortex 1 (Enc1), mRNA.	9.3857	0.000161959	0.00133699	NaN	0.599087	9.03625	213.678	58.1242	1930.85	440.545
389	461	Nkx3.1CE2/+; Ptenf/f intact-veh	CAPSL	Mus musculus calcyphosine-like (Capsl), mRNA.	9.36867	0.000223601	0.00153129	NaN	0.827099	7.45373	149.21	11.3269	1112.17	251.261
390	462	Nkx3.1CE2/+; Ptenf/f intact-veh	FOXP1	NULL	9.3631	0.000232084	0.00155555	NaN	0.858479	2.1788	326.307	53.7491	710.959	65.9415
391	463	Nkx3.1CE2/+; Ptenf/f intact-veh	D5ERTD579E	Mus musculus DNA segment, Chr 5, ERATO Doi 579, expressed (D5Ertd579e), mRNA.	9.3591	3.6385e-05	0.00067294	NaN	0.134588	2.58375	323.266	45.4009	835.239	117.61
392	464	Nkx3.1CE2/+; Ptenf/f intact-veh	E330036I19RIK	Mus musculus RIKEN cDNA E330036I19 gene (E330036I19Rik), mRNA.	9.3523	0.000172431	0.0013636	NaN	0.637822	3.57207	744.919	60.8201	2660.91	494.395
393	465	Nkx3.1CE2/+; Ptenf/f intact-veh	1700030K09RIK	Mus musculus RIKEN cDNA 1700030K09 gene (1700030K09Rik), mRNA.	9.3418	0.000129437	0.00120601	NaN	0.478787	2.53062	310.26	21.1753	785.15	120.865
394	466	Nkx3.1CE2/+; Ptenf/f intact-veh	RAB19	Mus musculus RAB19, member RAS oncogene family (Rab19), mRNA.	9.33603	0.000215492	0.00150397	NaN	0.797105	3.44301	204.19	8.82265	703.029	130.284
395	467	Nkx3.1CE2/+; Ptenf/f intact-veh	PSMB8	NULL	9.3334	0.000233187	0.00155555	NaN	0.86256	20.1333	371.477	56.1589	7479.06	1863.65
396	468	Nkx3.1CE2/+; Ptenf/f intact-veh	ATHL1	Mus musculus ATH1, acid trehalase-like 1 (yeast) (Athl1), mRNA.	9.32782	0.000100183	0.00105879	NaN	0.370576	2.85515	188.548	18.9183	538.332	87.8706
397	469	Nkx3.1CE2/+; Ptenf/f intact-veh	LOC624662	PREDICTED: Mus musculus similar to MGC69457 protein (LOC624662), misc RNA.	9.31112	4.18916e-05	0.000706606	NaN	0.154957	2.8404	4621.99	959.978	13128.3	1778.89
398	470	Nkx3.1CE2/+; Ptenf/f intact-veh	AB112350	Mus musculus cDNA sequence AB112350 (AB112350), mRNA.	9.29285	0.000234123	0.00155555	NaN	0.866021	4.68864	146.123	5.85253	685.118	141.832
399	472	Nkx3.1CE2/+; Ptenf/f intact-veh	TGM2	Mus musculus transglutaminase 2, C polypeptide (Tgm2), mRNA.	9.28587	0.000168245	0.00134997	NaN	0.622337	5.32676	2569.62	389.106	13687.7	2880.72
400	473	Nkx3.1CE2/+; Ptenf/f intact-veh	D030041G07RIK	NULL	9.27962	4.5802e-05	0.000740139	NaN	0.169422	2.34535	366.275	40.1132	859.042	117.05
401	474	Nkx3.1CE2/+; Ptenf/f intact-veh	EVA1	Mus musculus epithelial V-like antigen 1 (Eva1), mRNA.	9.2738	0.000155892	0.00131354	NaN	0.576644	3.51304	133.281	13.0122	468.221	86.5327
402	475	Nkx3.1CE2/+; Ptenf/f intact-veh	RUNX1	Mus musculus runt related transcription factor 1 (Runx1), mRNA.	9.26922	5.49313e-05	0.000803127	NaN	0.203191	3.94865	155.682	34.5114	614.733	111.058
403	476	Nkx3.1CE2/+; Ptenf/f intact-veh	LGALS9	Mus musculus lectin, galactose binding, soluble 9 (Lgals9), mRNA.	9.26201	0.000244653	0.00158489	NaN	0.904973	16.7585	217.74	17.5715	3649	907.112
404	477	Nkx3.1CE2/+; Ptenf/f intact-veh	ST3GAL6	Mus musculus ST3 beta-galactoside alpha-2,3-sialyltransferase 6 (St3gal6), mRNA.	9.25734	0.00013658	0.00124436	NaN	0.50521	2.74593	226.293	17.6896	621.383	101.503
405	478	Nkx3.1CE2/+; Ptenf/f intact-veh	8430410A17RIK	Mus musculus RIKEN cDNA 8430410A17 gene (8430410A17Rik), mRNA.	9.24675	6.99656e-05	0.000900747	NaN	0.258803	2.53082	203.524	38.7165	515.082	61.755
406	479	Nkx3.1CE2/+; Ptenf/f intact-veh	SH3RF1	Mus musculus SH3 domain containing ring finger 1 (Sh3rf1), mRNA.	9.23082	5.69896e-05	0.00081006	NaN	0.210805	2.4532	1153.59	125.898	2829.99	407.664
407	480	Nkx3.1CE2/+; Ptenf/f intact-veh	VILL	Mus musculus villin-like (Vill), mRNA.	9.22964	0.000240169	0.00157108	NaN	0.888386	9.94383	163.701	17.5446	1627.82	387.775
408	481	Nkx3.1CE2/+; Ptenf/f intact-veh	PKP3	Mus musculus plakophilin 3 (Pkp3), mRNA.	9.22639	0.000150534	0.00129013	NaN	0.556826	2.57502	379.78	24.9391	977.94	154.838
409	482	Nkx3.1CE2/+; Ptenf/f intact-veh	1110017F19RIK	NULL	9.22601	0.000242821	0.00157855	NaN	0.898196	7.82504	252.367	18.3396	1974.78	456.563
410	484	Nkx3.1CE2/+; Ptenf/f intact-veh	TRP53I11	Mus musculus transformation related protein 53 inducible protein 11 (Trp53i11), mRNA.	9.22337	4.20257e-05	0.000706606	NaN	0.155453	2.87993	149.648	24.5621	430.976	66.1477
411	485	Nkx3.1CE2/+; Ptenf/f intact-veh	4832420L08RIK	NULL	9.22164	0.000144494	0.00128042	NaN	0.534484	2.4679	456.597	29.1631	1126.83	173.188
412	486	Nkx3.1CE2/+; Ptenf/f intact-veh	EIF2AK2	Mus musculus eukaryotic translation initiation factor 2-alpha kinase 2 (Eif2ak2), mRNA.	9.22101	0.000160204	0.00133167	NaN	0.592595	5.78283	797.926	149.473	4614.27	991.5
413	487	Nkx3.1CE2/+; Ptenf/f intact-veh	PON3	Mus musculus paraoxonase 3 (Pon3), mRNA.	9.2146	0.000175966	0.00137693	NaN	0.650899	5.78123	279.554	46.7653	1616.16	349.098
414	488	Nkx3.1CE2/+; Ptenf/f intact-veh	TMEM40	Mus musculus transmembrane protein 40 (Tmem40), mRNA.	9.20014	0.000205008	0.00146324	NaN	0.758324	3.86434	142.315	11.0275	549.955	107.406
415	489	Nkx3.1CE2/+; Ptenf/f intact-veh	PLEKHF2	Mus musculus pleckstrin homology domain containing, family F (with FYVE domain) member 2 (Plekhf2), mRNA.	9.19181	0.000131773	0.00121553	NaN	0.487428	3.08524	561.582	56.129	1732.62	301.8
416	490	Nkx3.1CE2/+; Ptenf/f intact-veh	PLCD3	Mus musculus phospholipase C, delta 3 (Plcd3), mRNA.	9.18571	0.000148927	0.00129012	NaN	0.550881	3.72236	300.988	35.4659	1120.38	212.668
417	491	Nkx3.1CE2/+; Ptenf/f intact-veh	CLIP4	Mus musculus CAP-GLY domain containing linker protein family, member 4 (Clip4), mRNA.	9.18013	0.000256762	0.00161203	NaN	0.949764	24.0114	148.476	8.73825	3565.11	911.561
418	492	Nkx3.1CE2/+; Ptenf/f intact-veh	VARS2	Mus musculus valyl-tRNA synthetase 2, mitochondrial (putative) (Vars2), mRNA.	9.17783	0.000174443	0.00136999	NaN	0.645265	4.4162	140.374	17.5209	619.919	125.565
419	493	Nkx3.1CE2/+; Ptenf/f intact-veh	BC042423	NULL	9.17258	0.000248384	0.00159275	NaN	0.918772	6.24606	166.413	10.0389	1039.43	232.701
420	494	Nkx3.1CE2/+; Ptenf/f intact-veh	GSTA4	Mus musculus glutathione S-transferase, alpha 4 (Gsta4), mRNA.	9.15674	0.000235475	0.00156097	NaN	0.871021	15.5792	329.886	89.098	5139.36	1280.38
421	495	Nkx3.1CE2/+; Ptenf/f intact-veh	2010308M01RIK	NULL	9.15183	0.000200131	0.00143765	NaN	0.740284	4.37771	155.346	15.8556	680.057	138.638
422	497	Nkx3.1CE2/+; Ptenf/f intact-veh	LOC100048589	PREDICTED: Mus musculus similar to CDNA sequence BC052040, transcript variant 1 (LOC100048589), mRNA.	9.1422	0.00024667	0.00159238	NaN	0.912433	3.84632	287.15	11.8804	1104.47	218.341
423	498	Nkx3.1CE2/+; Ptenf/f intact-veh	IL28RA	Mus musculus interleukin 28 receptor alpha (Il28ra), mRNA.	9.13604	0.000249097	0.00159275	NaN	0.921411	2.7622	587.206	14.2289	1621.98	276.706
424	499	Nkx3.1CE2/+; Ptenf/f intact-veh	SOX13	Mus musculus SRY-box containing gene 13 (Sox13), mRNA.	9.13386	0.000195267	0.00143399	NaN	0.722293	2.73436	234.353	13.0889	640.806	107.418
425	501	Nkx3.1CE2/+; Ptenf/f intact-veh	FLNB	Mus musculus filamin, beta (Flnb), mRNA. XM_904364 XM_990154	9.11548	4.26479e-05	0.000710607	NaN	0.157755	3.3246	962.553	205.23	3200.1	526.579
426	502	Nkx3.1CE2/+; Ptenf/f intact-veh	1110008L16RIK	NULL	9.10186	0.000136184	0.00124381	NaN	0.503744	2.92902	647.345	61.3812	1896.09	324.657
427	503	Nkx3.1CE2/+; Ptenf/f intact-veh	NFKBIZ	Mus musculus nuclear factor of kappa light polypeptide gene enhancer in B-cells inhibitor, zeta (Nfkbiz), mRNA.	9.09668	7.30533e-05	0.000900747	NaN	0.270224	4.14116	484.81	107.769	2007.68	380.692
428	504	Nkx3.1CE2/+; Ptenf/f intact-veh	PLEKHA2	Mus musculus pleckstrin homology domain-containing, family A (phosphoinositide binding specific) member 2 (Plekha2), mRNA.	9.09443	0.000268304	0.00165686	NaN	0.992458	7.43518	655.926	12.6427	4876.92	1136.74
429	505	Nkx3.1CE2/+; Ptenf/f intact-veh	LOC381770	NULL	9.09225	0.000234202	0.00155555	NaN	0.866313	2.82564	167.185	6.73328	472.406	81.6745
430	506	Nkx3.1CE2/+; Ptenf/f intact-veh	PPP1R3B	NULL	9.09051	0.000248686	0.00159275	NaN	0.91989	7.70781	151.166	16.979	1165.16	272.17
431	507	Nkx3.1CE2/+; Ptenf/f intact-veh	FBXO34	Mus musculus F-box protein 34 (Fbxo34), mRNA.	9.08935	0.000229293	0.00155055	NaN	0.848153	5.12303	306.664	30.0995	1571.05	338.069
432	508	Nkx3.1CE2/+; Ptenf/f intact-veh	2510002J07RIK	NULL	9.08902	7.15986e-05	0.000900747	NaN	0.264843	2.33113	269.96	44.9044	629.313	73.1181
433	511	Nkx3.1CE2/+; Ptenf/f intact-veh	5730494J16RIK	NULL	9.06719	0.000116592	0.00116561	NaN	0.431275	3.18457	234.85	28.6292	747.896	132.553
434	512	Nkx3.1CE2/+; Ptenf/f intact-veh	TRAFD1	Mus musculus TRAF type zinc finger domain containing 1 (Trafd1), mRNA.	9.05369	0.000252753	0.00159903	NaN	0.934933	2.56959	2270.63	61.1627	5834.58	960.345
435	513	Nkx3.1CE2/+; Ptenf/f intact-veh	RBMS1	NULL	9.03698	0.000249312	0.00159275	NaN	0.922205	7.89183	351.964	47.0311	2777.64	654.111
436	514	Nkx3.1CE2/+; Ptenf/f intact-veh	LYSMD2	Mus musculus LysM, putative peptidoglycan-binding, domain containing 2 (Lysmd2), mRNA.	9.03687	0.000206871	0.00146593	NaN	0.765217	2.56252	160.513	8.10464	411.319	67.0088
437	515	Nkx3.1CE2/+; Ptenf/f intact-veh	TDRD7	Mus musculus tudor domain containing 7 (Tdrd7), mRNA.	9.02195	7.00233e-05	0.000900747	NaN	0.259016	2.81012	1100.71	148.413	3093.14	498.572
438	516	Nkx3.1CE2/+; Ptenf/f intact-veh	PHLDA1	Mus musculus pleckstrin homology-like domain, family A, member 1 (Phlda1), mRNA.	9.02021	0.000204495	0.00146311	NaN	0.756426	12.3932	840.95	321.167	10422	2561.84
439	518	Nkx3.1CE2/+; Ptenf/f intact-veh	2700038C09RIK	Mus musculus RIKEN cDNA 2700038C09 gene (2700038C09Rik), mRNA.	9.01865	0.000226621	0.00153811	NaN	0.83827	2.28174	875.003	159.878	1996.53	204.122
440	520	Nkx3.1CE2/+; Ptenf/f intact-veh	TNS3	Mus musculus tensin 3 (Tns3), mRNA.	9.00539	4.5821e-05	0.000740139	NaN	0.169492	2.43696	1538.11	206.126	3748.31	525.777
441	521	Nkx3.1CE2/+; Ptenf/f intact-veh	MEMO1	Mus musculus mediator of cell motility 1 (Memo1), mRNA.	9.00021	0.000180201	0.00138778	NaN	0.666564	2.50467	201.688	12.2773	505.16	80.7473
442	525	Nkx3.1CE2/+; Ptenf/f intact-veh	2900026A02RIK	Mus musculus RIKEN cDNA 2900026A02 gene (2900026A02Rik), mRNA.	8.97481	0.000129096	0.00120587	NaN	0.477525	3.74226	481.646	72.2746	1802.45	345.691
443	526	Nkx3.1CE2/+; Ptenf/f intact-veh	SYNGR2	Mus musculus synaptogyrin 2 (Syngr2), mRNA.	8.96895	7.451e-05	0.000912625	NaN	0.275613	2.97255	1035.25	151.1	3077.34	515.148
444	527	Nkx3.1CE2/+; Ptenf/f intact-veh	SERTAD4	Mus musculus SERTA domain containing 4 (Sertad4), mRNA.	8.96703	6.65653e-05	0.000873139	NaN	0.246225	3.76252	327.815	70.7014	1233.41	226.271
445	528	Nkx3.1CE2/+; Ptenf/f intact-veh	INTS7	Mus musculus integrator complex subunit 7 (Ints7), mRNA.	8.96594	6.5619e-05	0.000868872	NaN	0.242725	2.4098	344.961	38.2415	831.287	121.359
446	530	Nkx3.1CE2/+; Ptenf/f intact-veh	RHOC	Mus musculus ras homolog gene family, member C (Rhoc), mRNA.	8.96286	0.000278224	0.00168267	NaN	1	6.14855	195.912	11.4389	1204.58	275.186
447	531	Nkx3.1CE2/+; Ptenf/f intact-veh	MAPK13	Mus musculus mitogen-activated protein kinase 13 (Mapk13), mRNA.	8.95628	0.000164537	0.00133699	NaN	0.608624	6.46661	458.118	114.638	2962.47	665.463
448	532	Nkx3.1CE2/+; Ptenf/f intact-veh	RARG	Mus musculus retinoic acid receptor, gamma (Rarg), transcript variant 1, mRNA.	8.95527	0.000197734	0.00143765	NaN	0.731419	2.31108	216.071	10.6024	499.358	76.0213
449	533	Nkx3.1CE2/+; Ptenf/f intact-veh	P2RY5	Mus musculus purinergic receptor P2Y, G-protein coupled, 5 (P2ry5), mRNA.	8.95183	0.000207663	0.00146873	NaN	0.768145	3.00767	1104.85	77.667	3323.03	596.94
450	534	Nkx3.1CE2/+; Ptenf/f intact-veh	H2-T10	Mus musculus histocompatibility 2, T region locus 10 (H2-T10), mRNA.	8.94947	0.000157981	0.00132402	NaN	0.58437	5.44038	462.227	97.8217	2514.69	544.462
451	535	Nkx3.1CE2/+; Ptenf/f intact-veh	OSBPL3	Mus musculus oxysterol binding protein-like 3 (Osbpl3), mRNA.	8.94752	0.000287606	0.00168993	NaN	1	11.727	189.449	12.5516	2221.66	556.059
452	536	Nkx3.1CE2/+; Ptenf/f intact-veh	LAMB3	Mus musculus laminin, beta 3 (Lamb3), mRNA.	8.94705	0.000143499	0.00128042	NaN	0.530801	4.11291	615.189	98.6993	2530.22	505.368
453	537	Nkx3.1CE2/+; Ptenf/f intact-veh	TNFRSF21	Mus musculus tumor necrosis factor receptor superfamily, member 21 (Tnfrsf21), mRNA.	8.94313	0.000252888	0.00159903	NaN	0.935432	7.05493	771.349	106.194	5441.82	1270.38
454	539	Nkx3.1CE2/+; Ptenf/f intact-veh	TSPO	Mus musculus translocator protein (Tspo), mRNA.	8.91799	0.000248809	0.00159275	NaN	0.920345	5.31633	2371.91	257.167	12609.8	2788.42
455	540	Nkx3.1CE2/+; Ptenf/f intact-veh	BC023744	Mus musculus cDNA sequence BC023744 (BC023744), mRNA. XM_923702	8.91783	0.000153845	0.0013016	NaN	0.569072	3.53219	466.292	58.6377	1647.03	313.537
456	541	Nkx3.1CE2/+; Ptenf/f intact-veh	4933412E12RIK	NULL	8.91759	0.000152159	0.00129686	NaN	0.562837	3.06773	184.195	19.084	565.059	101.075
457	542	Nkx3.1CE2/+; Ptenf/f intact-veh	0610012G03RIK	NULL	8.90385	0.000285958	0.00168993	NaN	1	5.34555	659.589	34.5847	3525.86	787.007
458	543	Nkx3.1CE2/+; Ptenf/f intact-veh	D230021E06RIK	NULL	8.90198	0.000162785	0.00133699	NaN	0.60214	2.42542	311.695	21.2549	755.991	118.5
459	544	Nkx3.1CE2/+; Ptenf/f intact-veh	PQLC1	Mus musculus PQ loop repeat containing 1 (Pqlc1), mRNA.	8.89741	4.77229e-05	0.000754848	NaN	0.176527	2.7915	1252.32	218.289	3495.86	534.974
460	545	Nkx3.1CE2/+; Ptenf/f intact-veh	OAS3	Mus musculus 2'-5' oligoadenylate synthetase 3 (Oas3), mRNA.	8.89313	0.000283702	0.00168993	NaN	1	5.16258	121.587	7.09771	627.702	139.04
461	546	Nkx3.1CE2/+; Ptenf/f intact-veh	4933428A15RIK	NULL	8.8842	0.000224695	0.00153133	NaN	0.831147	3.819	519.932	48.3963	1985.62	398.271
462	547	Nkx3.1CE2/+; Ptenf/f intact-veh	SULT1C2	NULL	8.88313	0.000299673	0.00172126	NaN	1	38.7683	140.065	19.533	5430.11	1458.45
463	548	Nkx3.1CE2/+; Ptenf/f intact-veh	TLR5	NULL	8.88276	0.000179064	0.00138279	NaN	0.662358	3.28645	230.369	23.3654	757.097	141.441
464	549	Nkx3.1CE2/+; Ptenf/f intact-veh	PPIH	NULL	8.88044	0.000292112	0.00169969	NaN	1	3.96855	297.293	9.42121	1179.82	243.062
465	550	Nkx3.1CE2/+; Ptenf/f intact-veh	SHKBP1	Mus musculus Sh3kbp1 binding protein 1 (Shkbp1), mRNA.	8.87685	0.000263657	0.00164186	NaN	0.975266	2.37764	231.49	7.16076	550.4	87.4159
466	551	Nkx3.1CE2/+; Ptenf/f intact-veh	C230037E05RIK	NULL	8.85254	0.000198218	0.00143765	NaN	0.733208	2.87566	187.61	14.3018	539.501	95.2442
467	552	Nkx3.1CE2/+; Ptenf/f intact-veh	IIGP2	Mus musculus interferon inducible GTPase 2 (Iigp2), mRNA.	8.8481	0.000302221	0.00172172	NaN	1	15.5569	345.748	36.4168	5378.77	1392.38
468	553	Nkx3.1CE2/+; Ptenf/f intact-veh	BMF	NULL	8.84479	0.000148133	0.00128825	NaN	0.547945	3.02987	344.051	37.2287	1042.43	186.107
469	554	Nkx3.1CE2/+; Ptenf/f intact-veh	NFE2L2	Mus musculus nuclear factor, erythroid derived 2, like 2 (Nfe2l2), mRNA.	8.84321	0.000163822	0.00133699	NaN	0.605979	4.45477	234.393	39.9565	1044.16	217.065
470	555	Nkx3.1CE2/+; Ptenf/f intact-veh	VIL1	Mus musculus villin 1 (Vil1), mRNA.	8.8276	0.000267568	0.00165556	NaN	0.989736	3.22584	138.7	7.28465	447.423	85.0432
471	556	Nkx3.1CE2/+; Ptenf/f intact-veh	AQP5	Mus musculus aquaporin 5 (Aqp5), mRNA.	8.79797	7.65124e-05	0.000921888	NaN	0.283019	4.6037	161.27	45.7293	742.437	148.32
472	557	Nkx3.1CE2/+; Ptenf/f intact-veh	TAGLN2	Mus musculus transgelin 2 (Tagln2), mRNA.	8.78855	0.000181586	0.00138778	NaN	0.671685	4.42628	1943.21	310.743	8601.18	1802.88
473	559	Nkx3.1CE2/+; Ptenf/f intact-veh	S100A1	Mus musculus S100 calcium binding protein A1 (S100a1), mRNA.	8.7735	0.000306667	0.00173185	NaN	1	11.5171	796.816	103.31	9177.02	2335.12
474	560	Nkx3.1CE2/+; Ptenf/f intact-veh	ARHGEF19	Mus musculus Rho guanine nucleotide exchange factor (GEF) 19 (Arhgef19), mRNA.	8.77285	0.000146814	0.00128825	NaN	0.543065	3.60503	178.338	25.927	642.915	124.426
475	561	Nkx3.1CE2/+; Ptenf/f intact-veh	LOC209281	PREDICTED: Mus musculus similar to capping protein (actin filament) muscle Z-line, alpha 1 (LOC209281), mRNA.	8.76917	6.05759e-05	0.000838667	NaN	0.22407	2.81997	182.724	29.7795	515.278	82.7966
476	562	Nkx3.1CE2/+; Ptenf/f intact-veh	TJP3	NULL	8.76513	0.000319673	0.00176488	NaN	1	8.16389	279.215	6.16301	2279.48	558.923
477	563	Nkx3.1CE2/+; Ptenf/f intact-veh	LOC100044221	PREDICTED: Mus musculus hypothetical protein LOC100044221 (LOC100044221), mRNA.	8.76183	0.000124222	0.00118778	NaN	0.459496	6.16818	307.819	99.2418	1898.68	422.022
478	564	Nkx3.1CE2/+; Ptenf/f intact-veh	ARPC1B	Mus musculus actin related protein 2/3 complex, subunit 1B (Arpc1b), mRNA.	8.75777	0.000212309	0.00149019	NaN	0.785331	3.14875	2730.11	237.089	8596.43	1606.15
479	565	Nkx3.1CE2/+; Ptenf/f intact-veh	COL17A1	Mus musculus collagen, type XVII, alpha 1 (Col17a1), mRNA.	8.75287	0.000260316	0.00162472	NaN	0.962909	7.39883	386.725	71.56	2861.31	685.078
480	566	Nkx3.1CE2/+; Ptenf/f intact-veh	LAMA5	Mus musculus laminin, alpha 5 (Lama5), mRNA.	8.75116	0.000302754	0.00172172	NaN	1	5.74162	717.434	53.778	4119.23	949.137
481	568	Nkx3.1CE2/+; Ptenf/f intact-veh	CDS1	Mus musculus CDP-diacylglycerol synthase 1 (Cds1), mRNA.	8.73952	0.000110805	0.00113852	NaN	0.409868	2.94213	838.143	109.388	2465.92	429.202
482	569	Nkx3.1CE2/+; Ptenf/f intact-veh	DTX2	Mus musculus deltex 2 homolog (Drosophila) (Dtx2), mRNA.	8.73745	9.15911e-05	0.00101133	NaN	0.338795	2.63292	579.679	70.1566	1526.25	246.118
483	571	Nkx3.1CE2/+; Ptenf/f intact-veh	LOC676704	PREDICTED: Mus musculus similar to downregulated in ovarian cancer 1 isoform 2 (LOC676704), mRNA.	8.70105	0.000231317	0.00155555	NaN	0.85564	3.36582	167.501	15.0392	563.779	109.513
484	572	Nkx3.1CE2/+; Ptenf/f intact-veh	6430706D22RIK	Mus musculus RIKEN cDNA 6430706D22 gene (6430706D22Rik), mRNA.	8.69985	0.000299582	0.00172126	NaN	1	5.19507	848.22	71.7128	4406.56	996.724
485	573	Nkx3.1CE2/+; Ptenf/f intact-veh	AI987692	Mus musculus expressed sequence AI987692 (AI987692), mRNA.	8.69983	0.000327592	0.00178906	NaN	1	62.9056	257.331	115.804	16187.6	4482.26
486	574	Nkx3.1CE2/+; Ptenf/f intact-veh	TBC1D2	Mus musculus TBC1 domain family, member 2 (Tbc1d2), mRNA.	8.69162	0.000216711	0.0015095	NaN	0.801614	3.65438	268.748	29.6984	982.105	196.604
487	575	Nkx3.1CE2/+; Ptenf/f intact-veh	D130059P03RIK	Mus musculus RIKEN cDNA D130059P03 gene (D130059P03Rik), mRNA.	8.68835	0.000150667	0.00129013	NaN	0.557316	2.67248	185.201	17.7771	494.946	83.6285
488	576	Nkx3.1CE2/+; Ptenf/f intact-veh	GPX2	Mus musculus glutathione peroxidase 2 (Gpx2), mRNA.	8.68038	0.000334433	0.00179804	NaN	1	22.8795	374.069	29.7561	8558.52	2309.16
489	577	Nkx3.1CE2/+; Ptenf/f intact-veh	CEPT1	Mus musculus choline/ethanolaminephosphotransferase 1 (Cept1), mRNA.	8.6769	0.000198553	0.00143765	NaN	0.734448	3.45668	1481.72	168.404	5121.84	999.627
490	578	Nkx3.1CE2/+; Ptenf/f intact-veh	HIST1H2BF	Mus musculus histone cluster 1, H2bf (Hist1h2bf), mRNA.	8.67562	6.27828e-05	0.000858549	NaN	0.232234	3.5796	2716.52	645.815	9724.07	1755.11
491	579	Nkx3.1CE2/+; Ptenf/f intact-veh	SLC22A18	Mus musculus solute carrier family 22 (organic cation transporter), member 18 (Slc22a18), transcript variant 1, mRNA.	8.67174	0.00029362	0.00169969	NaN	1	4.57241	319.295	26.7976	1459.95	319.961
492	581	Nkx3.1CE2/+; Ptenf/f intact-veh	ALDOA	Mus musculus aldolase A, fructose-bisphosphate (Aldoa), mRNA.	8.64876	0.000315958	0.00175755	NaN	1	2.82195	5625.12	180.731	15873.8	2891.34
493	582	Nkx3.1CE2/+; Ptenf/f intact-veh	EPS8	Mus musculus epidermal groNkx3.1CE2/+h factor receptor pathway substrate 8 (Eps8), mRNA.	8.64782	6.88981e-05	0.000897373	NaN	0.254854	2.62012	388.411	55.8867	1017.68	159.76
494	583	Nkx3.1CE2/+; Ptenf/f intact-veh	HPS1	Mus musculus Hermansky-Pudlak syndrome 1 homolog (human) (Hps1), mRNA.	8.64605	9.78254e-05	0.00104583	NaN	0.361856	2.58764	312.984	37.1495	809.889	130.606
495	586	Nkx3.1CE2/+; Ptenf/f intact-veh	TSPAN17	Mus musculus tetraspanin 17 (Tspan17), mRNA.	8.64279	0.000282956	0.00168993	NaN	1	4.1951	539.004	47.845	2261.17	483.375
496	587	Nkx3.1CE2/+; Ptenf/f intact-veh	DTX4	Mus musculus deltex 4 homolog (Drosophila) (Dtx4), mRNA. XM_001000490	8.64136	0.000335798	0.00179804	NaN	1	10.6221	152.265	13.3251	1617.38	414.874
497	588	Nkx3.1CE2/+; Ptenf/f intact-veh	HIST1H2BH	Mus musculus histone cluster 1, H2bh (Hist1h2bh), mRNA.	8.64072	6.57703e-05	0.000868872	NaN	0.243284	3.74134	1887.23	472.96	7060.77	1305.2
498	589	Nkx3.1CE2/+; Ptenf/f intact-veh	CNP	Mus musculus 2',3'-cyclic nucleotide 3' phosphodiesterase (Cnp), mRNA.	8.64039	0.000330341	0.00178906	NaN	1	2.46982	281.378	5.07919	694.954	117.025
499	590	Nkx3.1CE2/+; Ptenf/f intact-veh	MYD88	Mus musculus myeloid differentiation primary response gene 88 (Myd88), mRNA.	8.6354	5.71392e-05	0.00081006	NaN	0.211358	2.24225	1964.68	247.968	4405.31	596.913
500	591	Nkx3.1CE2/+; Ptenf/f intact-veh	NCAPH	Mus musculus non-SMC condensin I complex, subunit H (Ncaph), mRNA.	8.63468	0.000292621	0.00169969	NaN	1	3.16768	158.053	8.76912	500.661	96.3969
501	592	Nkx3.1CE2/+; Ptenf/f intact-veh	TRMT2B	Mus musculus TRM2 tRNA methyltransferase 2 homolog B (S. cerevisiae) (Trmt2b), mRNA.	8.63298	7.03822e-05	0.000900747	NaN	0.260344	2.6581	332.843	48.8253	884.729	140.544
502	593	Nkx3.1CE2/+; Ptenf/f intact-veh	EFNB1	Mus musculus ephrin B1 (Efnb1), mRNA.	8.61913	0.000125059	0.00118918	NaN	0.462593	3.04844	387.6	52.8769	1181.58	212.89
503	594	Nkx3.1CE2/+; Ptenf/f intact-veh	LRP4	Mus musculus low density lipoprotein receptor-related protein 4 (Lrp4), mRNA.	8.61763	0.000333663	0.00179804	NaN	1	2.74798	198.764	4.42214	546.2	98.5576
504	595	Nkx3.1CE2/+; Ptenf/f intact-veh	PPARG	Mus musculus peroxisome proliferator activated receptor gamma (Pparg), mRNA.	8.61697	0.00034291	0.00180518	NaN	1	9.69992	146.837	9.26808	1424.3	362.9
505	596	Nkx3.1CE2/+; Ptenf/f intact-veh	GNAL1	Mus musculus guanine nucleotide binding protein-like 1 (Gnal1), mRNA.	8.61662	6.34001e-05	0.000858549	NaN	0.234517	2.37989	708.973	92.6474	1687.27	245.309
506	597	Nkx3.1CE2/+; Ptenf/f intact-veh	CDCA7	Mus musculus cell division cycle associated 7 (Cdca7), mRNA.	8.61661	0.000342551	0.00180518	NaN	1	5.35567	293.082	9.69511	1569.65	362.637
507	598	Nkx3.1CE2/+; Ptenf/f intact-veh	1700021K19RIK	Mus musculus RIKEN cDNA 1700021K19 gene (1700021K19Rik), mRNA.	8.6074	0.000257123	0.00161203	NaN	0.951098	2.68052	528.154	31.4832	1415.73	248.63
508	599	Nkx3.1CE2/+; Ptenf/f intact-veh	PLCD1	NULL	8.59283	0.000194128	0.00143247	NaN	0.718079	2.86313	314.633	29.3182	900.837	161.879
509	600	Nkx3.1CE2/+; Ptenf/f intact-veh	MGMT	NULL	8.58692	0.000214137	0.00149734	NaN	0.792093	3.29466	202.953	21.3072	668.661	129.384
510	601	Nkx3.1CE2/+; Ptenf/f intact-veh	ANKRD10	Mus musculus ankyrin repeat domain 10 (Ankrd10), mRNA.	8.5856	6.55662e-05	0.000868872	NaN	0.242529	2.78268	402.324	67.7079	1119.54	180.836
511	602	Nkx3.1CE2/+; Ptenf/f intact-veh	SSFA2	NULL	8.57269	0.000127994	0.00119861	NaN	0.473452	2.57247	1005.33	106.292	2586.18	425.953
512	603	Nkx3.1CE2/+; Ptenf/f intact-veh	SDCBP2	Mus musculus syndecan binding protein (syntenin) 2 (Sdcbp2), mRNA.	8.57157	0.000354455	0.00184666	NaN	1	22.9556	183.076	17.9514	4202.62	1148.38
513	604	Nkx3.1CE2/+; Ptenf/f intact-veh	CHRNB1	Mus musculus cholinergic receptor, nicotinic, beta polypeptide 1 (muscle) (Chrnb1), mRNA.	8.57109	0.000303011	0.00172172	NaN	1	4.65112	252.208	23.8279	1173.05	260.997
514	605	Nkx3.1CE2/+; Ptenf/f intact-veh	BCL11A	NULL	8.56351	8.01161e-05	0.000952794	NaN	0.29635	2.63937	209.457	29.4072	552.834	88.9796
515	606	Nkx3.1CE2/+; Ptenf/f intact-veh	OGFR	Mus musculus opioid groNkx3.1CE2/+h factor receptor (Ogfr), mRNA.	8.56124	0.000194404	0.00143247	NaN	0.719099	2.94954	996.437	99.0485	2939.03	537.861
516	607	Nkx3.1CE2/+; Ptenf/f intact-veh	TTC22	Mus musculus tetratricopeptide repeat domain 22 (Ttc22), mRNA.	8.54649	0.000195386	0.00143399	NaN	0.722731	2.90691	178.622	17.458	519.239	94.4497
517	608	Nkx3.1CE2/+; Ptenf/f intact-veh	ETL4	Mus musculus enhancer trap locus 4 (Etl4), mRNA.	8.54046	8.85621e-05	0.000998554	NaN	0.327591	2.61292	1279.14	169.975	3342.31	540.711
518	609	Nkx3.1CE2/+; Ptenf/f intact-veh	D530004J12RIK	NULL	8.53684	0.000358685	0.00185434	NaN	1	8.16035	144.696	7.37485	1180.77	297.099
519	611	Nkx3.1CE2/+; Ptenf/f intact-veh	MSR2	NULL	8.52724	0.000164693	0.00133699	NaN	0.6092	2.95505	165.872	19.1336	490.161	89.1368
520	612	Nkx3.1CE2/+; Ptenf/f intact-veh	QSOX1	Mus musculus quiescin Q6 sulfhydryl oxidase 1 (Qsox1), transcript variant 2, mRNA.	8.51291	0.00011515	0.00116318	NaN	0.425938	2.59575	127.784	14.9284	331.694	54.743
521	613	Nkx3.1CE2/+; Ptenf/f intact-veh	MSL2L1	PREDICTED: Mus musculus male-specific lethal 2-like 1 (Drosophila) (Msl2l1), mRNA.	8.49403	0.000324571	0.00177602	NaN	1	3.05085	255.322	12.5686	778.948	149.952
522	614	Nkx3.1CE2/+; Ptenf/f intact-veh	UGT2B34	Mus musculus UDP glucuronosyltransferase 2 family, polypeptide B34 (Ugt2b34), mRNA.	8.48933	0.000344741	0.00180879	NaN	1	4.94531	109.71	7.8798	542.55	124.392
523	615	Nkx3.1CE2/+; Ptenf/f intact-veh	D14ERTD668E	Mus musculus DNA segment, Chr 14, ERATO Doi 668, expressed (D14Ertd668e), mRNA.	8.47819	0.000368614	0.00189113	NaN	1	12.4642	233.981	23.0728	2916.38	774.302
524	616	Nkx3.1CE2/+; Ptenf/f intact-veh	CLN3	Mus musculus ceroid lipofuscinosis, neuronal 3, juvenile (Batten, Spielmeyer-Vogt disease) (Cln3), mRNA.	8.47306	0.000337832	0.00179804	NaN	1	8.20892	220.048	33.9718	1806.35	456.064
525	617	Nkx3.1CE2/+; Ptenf/f intact-veh	MCM4	Mus musculus minichromosome maintenance deficient 4 homolog (S. cerevisiae) (Mcm4), mRNA.	8.47191	0.000357298	0.00185104	NaN	1	2.96477	650.001	19.0285	1927.11	368.269
526	618	Nkx3.1CE2/+; Ptenf/f intact-veh	BHLHB2	Mus musculus basic helix-loop-helix domain containing, class B2 (Bhlhb2), mRNA.	8.47148	0.000374139	0.00190026	NaN	1	20.0819	301.202	29.7133	6048.69	1661.33
527	620	Nkx3.1CE2/+; Ptenf/f intact-veh	CYP4F16	Mus musculus cytochrome P450, family 4, subfamily f, polypeptide 16 (Cyp4f16), mRNA.	8.46253	7.82721e-05	0.000937535	NaN	0.289528	2.35107	323.128	39.7815	759.696	113.15
528	621	Nkx3.1CE2/+; Ptenf/f intact-veh	TAP1	Mus musculus transporter 1, ATP-binding cassette, sub-family B (MDR/TAP) (Tap1), mRNA.	8.46166	0.000365242	0.00188025	NaN	1	6.02807	222.377	13.8354	1340.5	323.085
529	622	Nkx3.1CE2/+; Ptenf/f intact-veh	CAPN13	Mus musculus calpain 13 (Capn13), mRNA.	8.45326	0.000371662	0.00189886	NaN	1	22.0805	142.378	29.8507	3143.77	868.684
530	623	Nkx3.1CE2/+; Ptenf/f intact-veh	TMEM77	Mus musculus transmembrane protein 77 (Tmem77), transcript variant 2, mRNA.	8.4525	0.000271344	0.00166451	NaN	1	6.94059	809.19	184.156	5616.26	1368.5
531	624	Nkx3.1CE2/+; Ptenf/f intact-veh	SYT16	Mus musculus synaptotagmin XVI (Syt16), mRNA.	8.44325	0.000186185	0.00140485	NaN	0.6887	2.54699	126.482	11.1038	322.147	54.5497
532	626	Nkx3.1CE2/+; Ptenf/f intact-veh	TYRO3	Mus musculus TYRO3 protein tyrosine kinase 3 (Tyro3), mRNA. XM_925062	8.40012	0.000177815	0.00138279	NaN	0.657737	2.83603	142.324	15.7079	403.636	72.889
533	627	Nkx3.1CE2/+; Ptenf/f intact-veh	COL16A1	Mus musculus collagen, type XVI, alpha 1 (Col16a1), mRNA.	8.39564	0.000188415	0.00140797	NaN	0.696946	3.04977	1283.96	152.264	3915.77	737.039
534	628	Nkx3.1CE2/+; Ptenf/f intact-veh	TRP53	NULL	8.38452	0.000104351	0.00108731	NaN	0.385996	2.37168	544.637	61.0671	1291.7	200.437
535	629	Nkx3.1CE2/+; Ptenf/f intact-veh	LOC229810	NULL	8.38181	0.000139683	0.00126021	NaN	0.516688	4.1837	222.676	49.8678	931.61	194.805
536	630	Nkx3.1CE2/+; Ptenf/f intact-veh	LIMK2	Mus musculus LIM motif-containing protein kinase 2 (Limk2), transcript variant 1, mRNA.	8.37033	0.00030026	0.00172172	NaN	1	5.49157	826.765	131.826	4540.24	1070.6
537	631	Nkx3.1CE2/+; Ptenf/f intact-veh	ZFP518B	Mus musculus zinc finger protein 518B (Zfp518b), mRNA.	8.36888	0.000193011	0.00143032	NaN	0.713947	2.62318	248.645	23.3072	652.241	113.437
538	632	Nkx3.1CE2/+; Ptenf/f intact-veh	TMEM166	Mus musculus transmembrane protein 166 (Tmem166), mRNA.	8.36456	0.000291112	0.00169969	NaN	1	2.43303	172.875	9.32821	420.61	71.3376
539	633	Nkx3.1CE2/+; Ptenf/f intact-veh	BC014795	NULL	8.35917	0.00038505	0.00193782	NaN	1	5.35093	480.038	27.967	2568.65	610.747
540	634	Nkx3.1CE2/+; Ptenf/f intact-veh	RHOV	Mus musculus ras homolog gene family, member V (Rhov), mRNA.	8.34372	9.4136e-05	0.00102428	NaN	0.348209	2.58448	155.981	21.7036	403.13	65.7443
541	636	Nkx3.1CE2/+; Ptenf/f intact-veh	SOX4	Mus musculus SRY-box containing gene 4 (Sox4), mRNA.	8.32787	0.00039472	0.00196479	NaN	1	7.62883	266.282	21.5695	2031.42	518.287
542	637	Nkx3.1CE2/+; Ptenf/f intact-veh	LOC381285	NULL	8.30685	7.24467e-05	0.000900747	NaN	0.267981	2.63268	178.362	33.5983	469.571	71.5266
543	638	Nkx3.1CE2/+; Ptenf/f intact-veh	KLF7	NULL	8.29568	8.70723e-05	0.000994076	NaN	0.322081	2.80129	809.674	185.056	2268.13	341.998
544	639	Nkx3.1CE2/+; Ptenf/f intact-veh	B3GNT3	NULL	8.29439	0.000400779	0.00197401	NaN	1	6.50296	203.13	14.4904	1320.94	329.475
545	641	Nkx3.1CE2/+; Ptenf/f intact-veh	SERINC2	Mus musculus serine incorporator 2 (Serinc2), mRNA.	8.27363	0.000239272	0.00157108	NaN	0.885069	6.06457	698.532	182.084	4236.3	1015.24
546	643	Nkx3.1CE2/+; Ptenf/f intact-veh	PLEKHG2	Mus musculus pleckstrin homology domain containing, family G (with RhoGef domain) member 2 (Plekhg2), transcript variant 1, mRNA.	8.26083	0.000372462	0.00189923	NaN	1	2.87945	499.109	22.8881	1437.16	276.26
547	644	Nkx3.1CE2/+; Ptenf/f intact-veh	LOC268853	NULL	8.25173	0.000293241	0.00169969	NaN	1	3.36253	160.402	15.8292	539.356	110.241
548	645	Nkx3.1CE2/+; Ptenf/f intact-veh	BAIAP2L1	Mus musculus BAI1-associated protein 2-like 1 (Baiap2l1), mRNA.	8.24997	0.000344023	0.00180759	NaN	1	7.68441	174.213	36.7595	1338.72	341.823
549	646	Nkx3.1CE2/+; Ptenf/f intact-veh	RGS12	Mus musculus regulator of G-protein signaling 12 (Rgs12), mRNA.	8.24319	0.000270155	0.00166107	NaN	0.999302	3.48044	216.175	24.9701	752.383	155.373
550	647	Nkx3.1CE2/+; Ptenf/f intact-veh	CASP4	Mus musculus caspase 4, apoptosis-related cysteine peptidase (Casp4), mRNA.	8.24088	0.000398914	0.00196745	NaN	1	7.05332	175.999	19.4651	1241.38	315.471
551	648	Nkx3.1CE2/+; Ptenf/f intact-veh	ICAM1	Mus musculus intercellular adhesion molecule 1 (Icam1), mRNA.	8.23838	0.00039859	0.00196745	NaN	1	9.36094	275.088	42.689	2575.08	681.179
552	649	Nkx3.1CE2/+; Ptenf/f intact-veh	TBC1D2B	Mus musculus TBC1 domain family, member 2B (Tbc1d2b), mRNA.	8.23523	0.000334562	0.00179804	NaN	1	4.41854	344.162	40.29	1520.69	345.278
553	650	Nkx3.1CE2/+; Ptenf/f intact-veh	AKR1B8	Mus musculus aldo-keto reductase family 1, member B8 (Akr1b8), mRNA.	8.23269	0.000287386	0.00168993	NaN	1	4.09737	245.365	33.1805	1005.35	221.198
554	651	Nkx3.1CE2/+; Ptenf/f intact-veh	MGST3	Mus musculus microsomal glutathione S-transferase 3 (Mgst3), mRNA.	8.23107	0.000340974	0.00180438	NaN	1	3.6409	1898.44	165.98	6912.03	1473.42
555	652	Nkx3.1CE2/+; Ptenf/f intact-veh	FBLIM1	Mus musculus filamin binding LIM protein 1 (Fblim1), mRNA.	8.22332	0.000223584	0.00153129	NaN	0.827036	3.72588	370.835	57.0417	1381.69	290.096
556	654	Nkx3.1CE2/+; Ptenf/f intact-veh	CDH3	Mus musculus cadherin 3 (Cdh3), transcript variant 1, mRNA.	8.20665	0.000409852	0.00199742	NaN	1	3.23417	176.136	6.84862	569.655	117.056
557	655	Nkx3.1CE2/+; Ptenf/f intact-veh	FER1L4	PREDICTED: Mus musculus fer-1-like 4 (C. elegans) (Fer1l4), mRNA.	8.20259	0.000404068	0.00198229	NaN	1	5.54527	147.077	13.0488	815.585	198.777
558	656	Nkx3.1CE2/+; Ptenf/f intact-veh	SPNB3	Mus musculus spectrin beta 3 (Spnb3), mRNA.	8.18453	0.000353352	0.00184612	NaN	1	2.57364	486.087	25.0364	1251.02	226.175
559	657	Nkx3.1CE2/+; Ptenf/f intact-veh	KRBA1	Mus musculus KRAB-A domain containing 1 (Krba1), mRNA.	8.18387	0.000392701	0.00196297	NaN	1	4.96783	344.435	32.62	1711.1	406.442
560	658	Nkx3.1CE2/+; Ptenf/f intact-veh	GNPTAB	Mus musculus N-acetylglucosamine-1-phosphate transferase, alpha and beta subunits (Gnptab), mRNA.	8.17546	0.000232619	0.00155555	NaN	0.860458	2.23817	392.514	72.8527	878.514	102.898
561	659	Nkx3.1CE2/+; Ptenf/f intact-veh	LDHD	Mus musculus lactate dehydrogenase D (Ldhd), nuclear gene encoding mitochondrial protein, mRNA.	8.17148	0.000336463	0.00179804	NaN	1	3.37989	234.852	20.5309	793.772	165.007
562	660	Nkx3.1CE2/+; Ptenf/f intact-veh	USP18	Mus musculus ubiquitin specific peptidase 18 (Usp18), mRNA.	8.1705	0.000425899	0.00204557	NaN	1	29.6356	301.907	129.125	8947.18	2585.38
563	661	Nkx3.1CE2/+; Ptenf/f intact-veh	NEDD9	Mus musculus neural precursor cell expressed, developmentally down-regulated gene 9 (Nedd9), mRNA.	8.15471	0.000427473	0.00204557	NaN	1	10.881	231.222	36.1325	2515.92	684.368
564	662	Nkx3.1CE2/+; Ptenf/f intact-veh	RSDR1-PENDING	NULL	8.15451	0.000337524	0.00179804	NaN	1	2.78186	157.29	10.449	437.56	82.8818
565	663	Nkx3.1CE2/+; Ptenf/f intact-veh	NOXO1	Mus musculus NADPH oxidase organizer 1 (Noxo1), mRNA.	8.15204	0.00043233	0.00205816	NaN	1	11.7455	395.074	60.5994	4640.34	1272.72
566	664	Nkx3.1CE2/+; Ptenf/f intact-veh	GZMM	Mus musculus granzyme M (lymphocyte met-ase 1) (Gzmm), mRNA.	8.14533	0.000225074	0.00153133	NaN	0.832547	3.12582	153.586	19.2558	480.083	94.3331
567	665	Nkx3.1CE2/+; Ptenf/f intact-veh	CMBL	Mus musculus carboxymethylenebutenolidase-like (Pseudomonas) (Cmbl), mRNA.	8.14033	0.000388253	0.00194864	NaN	1	3.89775	139.4	11.0978	543.346	120.533
568	666	Nkx3.1CE2/+; Ptenf/f intact-veh	RNF186	Mus musculus ring finger protein 186 (Rnf186), mRNA.	8.13971	0.000454075	0.00212074	NaN	1	22.6981	140.306	5.93078	3184.68	916.107
569	667	Nkx3.1CE2/+; Ptenf/f intact-veh	MOV10	Mus musculus Moloney leukemia virus 10 (Mov10), mRNA.	8.13896	0.000408077	0.00199295	NaN	1	2.6537	151.674	5.7113	402.496	75.0538
570	668	Nkx3.1CE2/+; Ptenf/f intact-veh	5730559C18RIK	NULL	8.13578	0.000288701	0.0016924	NaN	1	3.05229	138.105	13.3869	421.537	83.208
571	669	Nkx3.1CE2/+; Ptenf/f intact-veh	SAMD14	Mus musculus sterile alpha motif domain containing 14 (Samd14), transcript variant 1, mRNA.	8.13482	0.00033726	0.00179804	NaN	1	4.06371	291.531	34.1239	1184.7	264.578
572	670	Nkx3.1CE2/+; Ptenf/f intact-veh	NFKBIE	Mus musculus nuclear factor of kappa light polypeptide gene enhancer in B-cells inhibitor, epsilon (Nfkbie), mRNA.	8.13351	0.000442347	0.00208971	NaN	1	5.72848	155.369	8.89114	890.026	220.892
573	671	Nkx3.1CE2/+; Ptenf/f intact-veh	2310006M14RIK	PREDICTED: Mus musculus RIKEN cDNA 2310006M14 gene (2310006M14Rik), misc RNA.	8.13298	0.000407694	0.00199295	NaN	1	2.92859	128.92	5.78212	377.553	74.4355
574	672	Nkx3.1CE2/+; Ptenf/f intact-veh	HR	Mus musculus hairless (Hr), mRNA.	8.13112	0.000430913	0.00205816	NaN	1	7.39856	430.992	46.0771	3188.72	828.202
575	673	Nkx3.1CE2/+; Ptenf/f intact-veh	MMP15	Mus musculus matrix metallopeptidase 15 (Mmp15), mRNA. XM_001002221	8.11765	0.000418425	0.00202057	NaN	1	4.13231	1527.73	102.713	6313.06	1436.64
576	674	Nkx3.1CE2/+; Ptenf/f intact-veh	PEX11A	NULL	8.11447	0.000223897	0.00153129	NaN	0.828196	3.11761	232.681	29.7388	725.408	142.668
577	675	Nkx3.1CE2/+; Ptenf/f intact-veh	STX7	Mus musculus syntaxin 7 (Stx7), mRNA.	8.11236	0.000199877	0.00143765	NaN	0.739345	2.67326	2089.17	228.642	5584.89	1004.77
578	676	Nkx3.1CE2/+; Ptenf/f intact-veh	CDC42EP5	Mus musculus CDC42 effector protein (Rho GTPase binding) 5 (Cdc42ep5), mRNA.	8.11106	0.000417591	0.00202057	NaN	1	4.0556	725.759	49.0932	2943.39	666.101
579	677	Nkx3.1CE2/+; Ptenf/f intact-veh	EPS8L1	Mus musculus EPS8-like 1 (Eps8l1), mRNA.	8.10724	0.000305589	0.0017284	NaN	1	3.01053	151.885	13.8238	457.255	90.1682
580	678	Nkx3.1CE2/+; Ptenf/f intact-veh	4631405K08RIK	NULL	8.10563	0.000233636	0.00155555	NaN	0.864219	2.80328	682.257	72.2905	1912.56	357.459
581	679	Nkx3.1CE2/+; Ptenf/f intact-veh	LOC547343	Mus musculus similar to H-2 class I histocompatibility antigen, L-D alpha chain precursor (LOC547343), mRNA.	8.09924	0.000421469	0.00203261	NaN	1	8.9097	489.265	84.8297	4359.21	1164.24
582	680	Nkx3.1CE2/+; Ptenf/f intact-veh	PANK2	Mus musculus pantothenate kinase 2 (Hallervorden-Spatz syndrome) (Pank2), nuclear gene encoding mitochondrial protein, mRNA.	8.08978	9.02811e-05	0.00100285	NaN	0.33395	2.55217	719.284	116.46	1835.73	295.212
583	681	Nkx3.1CE2/+; Ptenf/f intact-veh	AI481316	NULL	8.08897	0.000342624	0.00180518	NaN	1	3.46228	557.601	53.8484	1930.57	408.727
584	682	Nkx3.1CE2/+; Ptenf/f intact-veh	AGRN	Mus musculus agrin (Agrn), mRNA.	8.08871	0.000333922	0.00179804	NaN	1	4.0269	3757.83	464.619	15132.4	3381.29
585	683	Nkx3.1CE2/+; Ptenf/f intact-veh	LSM3	Mus musculus LSM3 homolog, U6 small nuclear RNA associated (S. cerevisiae) (Lsm3), mRNA.	8.08425	0.000151803	0.00129681	NaN	0.561519	2.55586	725.519	88.1116	1854.33	318.517
586	685	Nkx3.1CE2/+; Ptenf/f intact-veh	4933426M11RIK	Mus musculus RIKEN cDNA 4933426M11 gene (4933426M11Rik), mRNA.	8.08032	0.00092452	0.00335933	NaN	1	2.28685	1510.07	333.93	3453.3	352.125
587	686	Nkx3.1CE2/+; Ptenf/f intact-veh	HS3ST1	Mus musculus heparan sulfate (glucosamine) 3-O-sulfotransferase 1 (Hs3st1), mRNA.	8.07482	0.000339264	0.00180093	NaN	1	3.27569	219.71	20.2327	719.702	148.949
588	687	Nkx3.1CE2/+; Ptenf/f intact-veh	AKR1C12	Mus musculus aldo-keto reductase family 1, member C12 (Akr1c12), mRNA.	8.07117	0.000179009	0.00138279	NaN	0.662154	5.45748	380.1	121.386	2074.39	484.691
589	688	Nkx3.1CE2/+; Ptenf/f intact-veh	SKP2	Mus musculus S-phase kinase-associated protein 2 (p45) (Skp2), transcript variant 2, mRNA.	8.03723	0.000181609	0.00138778	NaN	0.671773	2.61226	198.474	23.1491	518.466	91.8641
590	689	Nkx3.1CE2/+; Ptenf/f intact-veh	ROBO1	Mus musculus roundabout homolog 1 (Drosophila) (Robo1), mRNA.	8.03281	0.000320441	0.00176648	NaN	1	2.32007	217.024	13.0802	503.51	85.3789
591	690	Nkx3.1CE2/+; Ptenf/f intact-veh	MEIS2	Mus musculus Meis homeobox 2 (Meis2), transcript variant 2, mRNA.	8.01978	0.000457707	0.002135	NaN	1	7.69872	870.933	103.174	6705.07	1775.94
592	691	Nkx3.1CE2/+; Ptenf/f intact-veh	PARP12	Mus musculus poly (ADP-ribose) polymerase family, member 12 (Parp12), mRNA.	8.0118	0.000374503	0.00190026	NaN	1	7.28828	225.911	52.312	1646.5	427.977
593	692	Nkx3.1CE2/+; Ptenf/f intact-veh	TAP2	Mus musculus transporter 2, ATP-binding cassette, sub-family B (MDR/TAP) (Tap2), mRNA.	8.00812	0.000322459	0.00177135	NaN	1	5.48861	314.513	65.4083	1726.24	421.789
594	693	Nkx3.1CE2/+; Ptenf/f intact-veh	IRF9	Mus musculus interferon regulatory factor 9 (Irf9), mRNA.	8.00783	0.000242312	0.00157855	NaN	0.896311	4.40492	793.474	164.26	3495.19	793.1
595	694	Nkx3.1CE2/+; Ptenf/f intact-veh	MYADM	Mus musculus myeloid-associated differentiation marker (Myadm), mRNA.	7.99562	0.000397954	0.00196745	NaN	1	3.98066	659.812	65.2343	2626.48	595.393
596	695	Nkx3.1CE2/+; Ptenf/f intact-veh	SCAMP5	Mus musculus secretory carrier membrane protein 5 (Scamp5), mRNA.	7.98065	0.000477056	0.00219481	NaN	1	6.42374	235.003	19.0494	1509.6	390.281
597	697	Nkx3.1CE2/+; Ptenf/f intact-veh	IAH1	Mus musculus isoamyl acetate-hydrolyzing esterase 1 homolog (S. cerevisiae) (Iah1), mRNA.	7.97634	0.000423435	0.00203679	NaN	1	2.58919	288.617	13.3443	747.284	139.584
598	698	Nkx3.1CE2/+; Ptenf/f intact-veh	BNIPL	Mus musculus BCL2/adenovirus E1B 19kD interacting protein like (Bnipl), mRNA.	7.9601	0.00030849	0.00173769	NaN	1	2.94016	202.883	19.9792	596.508	117.785
599	699	Nkx3.1CE2/+; Ptenf/f intact-veh	ENTPD2	Mus musculus ectonucleoside triphosphate diphosphohydrolase 2 (Entpd2), mRNA.	7.9601	0.000245356	0.00158666	NaN	0.907572	3.87978	723.656	129.361	2807.62	614.632
600	700	Nkx3.1CE2/+; Ptenf/f intact-veh	2010111I01RIK	Mus musculus RIKEN cDNA 2010111I01 gene (2010111I01Rik), mRNA. XM_988363	7.95615	0.00038031	0.00192128	NaN	1	2.67639	369.323	23.7786	988.451	187.624
601	701	Nkx3.1CE2/+; Ptenf/f intact-veh	RSC1A1	Mus musculus regulatory solute carrier protein, family 1, member 1 (Rsc1a1), mRNA.	7.94411	0.00039149	0.00195957	NaN	1	2.36426	277.913	14.0149	657.058	115.213
602	704	Nkx3.1CE2/+; Ptenf/f intact-veh	ATXN1L	Mus musculus ataxin 1-like (Atxn1l), mRNA.	7.92736	0.00017862	0.00138279	NaN	0.660716	2.43877	840.53	176.414	2049.86	278.186
603	706	Nkx3.1CE2/+; Ptenf/f intact-veh	HEBP2	Mus musculus heme binding protein 2 (Hebp2), mRNA.	7.9189	0.000182173	0.00138778	NaN	0.673859	2.77499	188.063	25.6834	521.874	96.6558
604	707	Nkx3.1CE2/+; Ptenf/f intact-veh	GPR177	Mus musculus G protein-coupled receptor 177 (Gpr177), mRNA.	7.91131	0.00024465	0.00158489	NaN	0.90496	2.40199	890.693	80.0835	2139.44	369.676
605	708	Nkx3.1CE2/+; Ptenf/f intact-veh	NT5C2	Mus musculus 5'-nucleotidase, cytosolic II (Nt5c2), mRNA.	7.90765	9.89261e-05	0.0010485	NaN	0.365928	2.4802	195.344	34.8654	484.491	74.7735
606	710	Nkx3.1CE2/+; Ptenf/f intact-veh	ERBB2	Mus musculus v-erb-b2 erythroblastic leukemia viral oncogene homolog 2, neuro/glioblastoma derived oncogene homolog (avian) (Erbb2), mRNA.	7.90457	0.000432067	0.00205816	NaN	1	2.72389	543.992	29.4553	1481.77	287.602
607	711	Nkx3.1CE2/+; Ptenf/f intact-veh	ITGAE	Mus musculus integrin, alpha E, epithelial-associated (Itgae), transcript variant 2, mRNA.	7.90219	0.000418226	0.00202057	NaN	1	2.65669	177.004	10.021	470.245	89.7863
608	712	Nkx3.1CE2/+; Ptenf/f intact-veh	RNF31	Mus musculus ring finger protein 31 (Rnf31), mRNA.	7.90212	0.000147703	0.00128825	NaN	0.546353	2.49874	438.499	57.1777	1095.69	186.981
609	713	Nkx3.1CE2/+; Ptenf/f intact-veh	SECTM1B	Mus musculus secreted and transmembrane 1B (Sectm1b), mRNA.	7.90038	0.00041178	0.00200365	NaN	1	7.7421	193.815	46.33	1500.54	399.812
610	715	Nkx3.1CE2/+; Ptenf/f intact-veh	JAK2	Mus musculus Janus kinase 2 (Jak2), transcript variant 2, mRNA.	7.88789	0.000169782	0.00135643	NaN	0.628025	2.30228	514.085	96.8694	1183.57	156.381
611	716	Nkx3.1CE2/+; Ptenf/f intact-veh	FCHO1	Mus musculus FCH domain only 1 (Fcho1), mRNA.	7.8784	0.000337498	0.00179804	NaN	1	2.62111	148.59	11.8627	389.471	72.9896
612	717	Nkx3.1CE2/+; Ptenf/f intact-veh	LOC100044190	PREDICTED: Mus musculus hypothetical protein LOC100044190 (LOC100044190), mRNA.	7.87323	0.000526279	0.00234261	NaN	1	4.72383	1610.49	42.0121	7607.69	1864.88
613	718	Nkx3.1CE2/+; Ptenf/f intact-veh	RARB	Mus musculus retinoic acid receptor, beta (Rarb), mRNA.	7.87208	0.000436872	0.00207444	NaN	1	3.13796	148.544	10.2551	466.126	97.7492
614	719	Nkx3.1CE2/+; Ptenf/f intact-veh	EDG5	Mus musculus endothelial differentiation, sphingolipid G-protein-coupled receptor, 5 (Edg5), mRNA.	7.85824	0.000389629	0.00195289	NaN	1	5.375	279.415	50.6227	1501.86	374.261
615	720	Nkx3.1CE2/+; Ptenf/f intact-veh	FOXO1	NULL	7.85346	0.000206286	0.0014657	NaN	0.763052	2.13405	309.896	52.4742	661.333	80.6714
616	721	Nkx3.1CE2/+; Ptenf/f intact-veh	4732474O15RIK	PREDICTED: Mus musculus RIKEN cDNA 4732474O15 gene (4732474O15Rik), mRNA.	7.84774	0.000291426	0.00169969	NaN	1	3.13814	137.368	17.123	431.081	88.4197
617	722	Nkx3.1CE2/+; Ptenf/f intact-veh	XDH	Mus musculus xanthine dehydrogenase (Xdh), mRNA.	7.84716	0.000538819	0.00236429	NaN	1	9.77066	353.252	8.06244	3451.5	967.051
618	723	Nkx3.1CE2/+; Ptenf/f intact-veh	UGT1A1	Mus musculus UDP glucuronosyltransferase 1 family, polypeptide A1 (Ugt1a1), mRNA.	7.8465	0.000211154	0.00148773	NaN	0.78106	3.42312	128.207	22.8055	438.869	91.4613
619	724	Nkx3.1CE2/+; Ptenf/f intact-veh	RAPGEFL1	Mus musculus Rap guanine nucleotide exchange factor (GEF)-like 1 (Rapgefl1), mRNA.	7.84641	0.000495054	0.00224688	NaN	1	7.20289	363.845	48.4912	2620.74	701.211
620	725	Nkx3.1CE2/+; Ptenf/f intact-veh	HIST1H2BJ	Mus musculus histone cluster 1, H2bj (Hist1h2bj), mRNA.	7.84343	0.000366574	0.00188327	NaN	1	3.69415	2146.07	265.678	7927.9	1766.13
621	726	Nkx3.1CE2/+; Ptenf/f intact-veh	EPHB2	NULL	7.82784	0.00051948	0.00233199	NaN	1	2.98464	148.69	4.80432	443.786	92.0911
622	727	Nkx3.1CE2/+; Ptenf/f intact-veh	2610307O08RIK	PREDICTED: Mus musculus RIKEN cDNA 2610307O08 gene, transcript variant 12 (2610307O08Rik), mRNA.	7.82696	0.000520993	0.00233476	NaN	1	6.41662	250.584	21.5613	1607.9	423.685
623	728	Nkx3.1CE2/+; Ptenf/f intact-veh	PARD6G	Mus musculus par-6 partitioning defective 6 homolog gamma (C. elegans) (Pard6g), mRNA.	7.82341	0.000107727	0.0011162	NaN	0.398484	2.78363	530.727	105.738	1477.35	255.897
624	729	Nkx3.1CE2/+; Ptenf/f intact-veh	COQ10B	Mus musculus coenzyme Q10 homolog B (S. cerevisiae) (Coq10b), transcript variant 1, mRNA.	7.81949	0.000199009	0.00143765	NaN	0.736135	2.42814	484.135	102.737	1175.55	160.627
625	730	Nkx3.1CE2/+; Ptenf/f intact-veh	ADAR	Mus musculus adenosine deaminase, RNA-specific (Adar), transcript variant 1, mRNA.	7.81606	0.000183462	0.00138778	NaN	0.678627	3.84919	577.205	133.187	2221.77	479.743
626	731	Nkx3.1CE2/+; Ptenf/f intact-veh	CXADR	Mus musculus coxsackie virus and adenovirus receptor (Cxadr), transcript variant 1, mRNA.	7.81478	0.000329653	0.00178906	NaN	1	5.72967	690.019	173.839	3953.58	992.96
627	732	Nkx3.1CE2/+; Ptenf/f intact-veh	LOC100047674	PREDICTED: Mus musculus similar to solute carrier family 35 (UDP-glucuronic acid/UDP-N-acetylgalactosamine dual transporter), member D1 (LOC100047674), mRNA.	7.81024	0.000477929	0.0021961	NaN	1	3.57671	215.335	15.4712	770.192	172.636
628	734	Nkx3.1CE2/+; Ptenf/f intact-veh	SLC15A4	Mus musculus solute carrier family 15, member 4 (Slc15a4), mRNA.	7.80121	0.000474124	0.00218676	NaN	1	2.82166	297.88	15.8541	840.515	168.899
629	736	Nkx3.1CE2/+; Ptenf/f intact-veh	2810003C17RIK	Mus musculus RIKEN cDNA 2810003C17 gene (2810003C17Rik), mRNA.	7.7963	0.000318126	0.0017616	NaN	1	2.95354	172.101	18.8106	508.307	102.227
630	737	Nkx3.1CE2/+; Ptenf/f intact-veh	2010110K16RIK	NULL	7.79606	0.000291096	0.00169969	NaN	1	2.45833	324.305	28.6091	797.248	142.983
631	738	Nkx3.1CE2/+; Ptenf/f intact-veh	C430004E15RIK	Mus musculus RIKEN cDNA C430004E15 gene (C430004E15Rik), mRNA.	7.79464	0.000550282	0.00239752	NaN	1	5.66288	483.064	17.8959	2735.53	707.393
632	739	Nkx3.1CE2/+; Ptenf/f intact-veh	FZD6	Mus musculus frizzled homolog 6 (Drosophila) (Fzd6), mRNA.	7.7932	0.000438009	0.00207717	NaN	1	3.52241	347.037	31.8162	1222.41	271.435
633	741	Nkx3.1CE2/+; Ptenf/f intact-veh	ZBTB7C	Mus musculus zinc finger and BTB domain containing 7C (Zbtb7c), mRNA.	7.78208	0.000501418	0.00226742	NaN	1	4.15731	144.459	11.3053	600.561	142.67
634	742	Nkx3.1CE2/+; Ptenf/f intact-veh	PITPNA	Mus musculus phosphatidylinositol transfer protein, alpha (Pitpna), mRNA.	7.78179	0.000222775	0.00153129	NaN	0.824046	3.3142	1572.32	268.145	5210.99	1080.75
635	743	Nkx3.1CE2/+; Ptenf/f intact-veh	LOC238943	NULL	7.77831	0.000538493	0.00236429	NaN	1	4.78693	239.968	13.951	1148.71	285.494
636	744	Nkx3.1CE2/+; Ptenf/f intact-veh	PGPEP1	Mus musculus pyroglutamyl-peptidase I (Pgpep1), mRNA.	7.76491	0.000369971	0.00189284	NaN	1	3.00447	365.623	35.8581	1098.5	225.561
637	745	Nkx3.1CE2/+; Ptenf/f intact-veh	TSPYL3	Mus musculus TSPY-like 3 (Tspyl3), mRNA.	7.75506	0.000197575	0.00143765	NaN	0.73083	2.35686	167.239	18.2217	394.159	66.8816
638	746	Nkx3.1CE2/+; Ptenf/f intact-veh	SERTAD1	Mus musculus SERTA domain containing 1 (Sertad1), mRNA.	7.74908	0.000218912	0.0015184	NaN	0.809754	2.51447	377.266	43.3564	948.625	169.88
639	747	Nkx3.1CE2/+; Ptenf/f intact-veh	PLEC1	Mus musculus plectin 1 (Plec1), transcript variant 5, mRNA.	7.74636	0.000382688	0.00192856	NaN	1	2.45019	3004.31	208.018	7361.14	1345.9
640	748	Nkx3.1CE2/+; Ptenf/f intact-veh	IMPA2	Mus musculus inositol (myo)-1(or 4)-monophosphatase 2 (Impa2), mRNA.	7.74624	0.000479273	0.00219954	NaN	1	2.71639	162.442	8.80154	441.256	87.2825
641	749	Nkx3.1CE2/+; Ptenf/f intact-veh	LOC100046616	PREDICTED: Mus musculus similar to aquaporin 5 (LOC100046616), mRNA.	7.74547	0.000249975	0.00159424	NaN	0.924657	2.15841	123.562	10.0074	266.698	42.9971
642	750	Nkx3.1CE2/+; Ptenf/f intact-veh	TMEM98	Mus musculus transmembrane protein 98 (Tmem98), mRNA.	7.73647	0.000152908	0.00129727	NaN	0.565608	3.57779	751.778	180.97	2689.7	557.654
643	751	Nkx3.1CE2/+; Ptenf/f intact-veh	COQ7	Mus musculus demethyl-Q 7 (Coq7), mRNA.	7.7359	0.000506188	0.00228062	NaN	1	3.52259	212.681	14.4768	749.188	168.641
644	753	Nkx3.1CE2/+; Ptenf/f intact-veh	INSL6	Mus musculus insulin-like 6 (Insl6), mRNA.	7.73213	0.000536675	0.00236329	NaN	1	4.77011	578.81	44.4049	2760.99	688.442
645	754	Nkx3.1CE2/+; Ptenf/f intact-veh	TNF	Mus musculus tumor necrosis factor (Tnf), mRNA.	7.7303	0.000567743	0.00245421	NaN	1	5.45836	133.903	6.15614	730.89	188.966
646	756	Nkx3.1CE2/+; Ptenf/f intact-veh	TSPAN33	Mus musculus tetraspanin 33 (Tspan33), mRNA.	7.72277	0.000522623	0.00233476	NaN	1	7.80873	186.734	31.051	1458.15	400.868
647	757	Nkx3.1CE2/+; Ptenf/f intact-veh	CD47	Mus musculus CD47 antigen (Rh-related antigen, integrin-associated signal transducer) (Cd47), mRNA.	7.72131	0.000279309	0.00168267	NaN	1	3.96642	813.128	158.37	3225.21	731.692
648	758	Nkx3.1CE2/+; Ptenf/f intact-veh	MID1IP1	Mus musculus Mid1 interacting protein 1 (gastrulation specific G12-like (zebrafish)) (Mid1ip1), mRNA.	7.71377	0.00012243	0.00118552	NaN	0.452867	3.17168	723.739	171.279	2295.46	436.378
649	759	Nkx3.1CE2/+; Ptenf/f intact-veh	CXCL15	Mus musculus chemokine (C-X-C motif) ligand 15 (Cxcl15), mRNA.	7.71049	0.000583946	0.00249424	NaN	1	46.0527	148.702	27.165	6848.11	2127.94
650	760	Nkx3.1CE2/+; Ptenf/f intact-veh	SULT2B1	Mus musculus sulfotransferase family, cytosolic, 2B, member 1 (Sult2b1), mRNA.	7.70039	0.000211562	0.00148777	NaN	0.782569	2.73681	160.057	22.1225	438.045	82.7084
651	761	Nkx3.1CE2/+; Ptenf/f intact-veh	AGFG2	Mus musculus ArfGAP with FG repeats 2 (Agfg2), transcript variant 1, mRNA.	7.69996	0.000302903	0.00172172	NaN	1	3.42344	1037.06	157.238	3550.33	767.966
652	762	Nkx3.1CE2/+; Ptenf/f intact-veh	LIMA1	Mus musculus LIM domain and actin binding 1 (Lima1), mRNA.	7.67571	0.000119476	0.00117538	NaN	0.441942	2.21101	1859.02	263.286	4110.33	614.425
653	764	Nkx3.1CE2/+; Ptenf/f intact-veh	KIF23	NULL	7.67094	0.000281497	0.00168993	NaN	1	2.84016	152.477	18.9204	433.06	85.507
654	765	Nkx3.1CE2/+; Ptenf/f intact-veh	EXPI	Mus musculus extracellular proteinase inhibitor (Expi), mRNA.	7.66881	0.00060049	0.00254654	NaN	1	85.5014	121.143	12.9639	10357.9	3269.67
655	766	Nkx3.1CE2/+; Ptenf/f intact-veh	D430007A19RIK	PREDICTED: Mus musculus RIKEN cDNA D430007A19 gene, transcript variant 3 (D430007A19Rik), mRNA.	7.66878	0.000483917	0.00220716	NaN	1	2.89169	212.021	14.1404	613.099	126.538
656	768	Nkx3.1CE2/+; Ptenf/f intact-veh	4833425P12RIK	NULL	7.65762	0.000337733	0.00179804	NaN	1	2.43229	244.463	20.5807	594.604	108.154
657	769	Nkx3.1CE2/+; Ptenf/f intact-veh	9130227N12RIK	NULL	7.65741	0.000536049	0.00236329	NaN	1	2.76229	212.34	9.85958	586.544	118.887
658	770	Nkx3.1CE2/+; Ptenf/f intact-veh	SKAP2	Mus musculus src family associated phosphoprotein 2 (Skap2), mRNA.	7.65733	0.00022743	0.00154078	NaN	0.841263	2.34997	2061.21	217.429	4843.78	835.313
659	771	Nkx3.1CE2/+; Ptenf/f intact-veh	IRF7	Mus musculus interferon regulatory factor 7 (Irf7), mRNA.	7.65677	0.000603049	0.00254654	NaN	1	22.475	153.814	14.4723	3456.98	1056.52
660	772	Nkx3.1CE2/+; Ptenf/f intact-veh	LOC676974	PREDICTED: Mus musculus similar to Glucose phosphate isomerase 1, transcript variant 2 (LOC676974), mRNA.	7.64967	0.000255219	0.00160554	NaN	0.944056	2.41702	472.333	48.898	1141.64	202.854
661	773	Nkx3.1CE2/+; Ptenf/f intact-veh	ACTN4	Mus musculus actinin alpha 4 (Actn4), mRNA.	7.64238	0.000354038	0.00184666	NaN	1	2.67973	2489.54	237.981	6671.28	1297.36
662	775	Nkx3.1CE2/+; Ptenf/f intact-veh	RALY	Mus musculus hnRNP-associated with lethal yellow (Raly), mRNA.	7.64087	0.000529629	0.00234622	NaN	1	2.48508	923.921	39.4723	2296.02	436.306
663	776	Nkx3.1CE2/+; Ptenf/f intact-veh	DTNBP1	NULL	7.63541	0.000149528	0.00129013	NaN	0.553104	2.43161	1721.28	247.129	4185.49	709.084
664	777	Nkx3.1CE2/+; Ptenf/f intact-veh	PLXDC1	Mus musculus plexin domain containing 1 (Plxdc1), mRNA.	7.63459	0.000144692	0.00128042	NaN	0.535216	2.33594	168.211	23.0052	392.93	64.3413
665	778	Nkx3.1CE2/+; Ptenf/f intact-veh	ARL6	Mus musculus ADP-ribosylation factor-like 6 (Arl6), mRNA.	7.63028	0.000518262	0.00232935	NaN	1	2.20965	416.47	84.9708	920.251	108.236
666	779	Nkx3.1CE2/+; Ptenf/f intact-veh	IRX5	Mus musculus Iroquois related homeobox 5 (Drosophila) (Irx5), mRNA.	7.62747	0.000127314	0.0011965	NaN	0.470935	2.9495	280.049	62.0414	826.004	151.795
667	781	Nkx3.1CE2/+; Ptenf/f intact-veh	2010313D22RIK	NULL	7.62244	0.000301338	0.00172172	NaN	1	2.30308	347.051	29.9318	799.287	139.026
668	782	Nkx3.1CE2/+; Ptenf/f intact-veh	TMEM132A	Mus musculus transmembrane protein 132A (Tmem132a), mRNA.	7.61813	0.000496645	0.00225134	NaN	1	4.79643	236.038	32.2726	1132.14	284.49
669	783	Nkx3.1CE2/+; Ptenf/f intact-veh	ADD3	Mus musculus adducin 3 (gamma) (Add3), mRNA.	7.61316	0.00012627	0.00119456	NaN	0.467074	2.83331	1648.79	353.9	4671.54	833.884
670	784	Nkx3.1CE2/+; Ptenf/f intact-veh	LXN	Mus musculus latexin (Lxn), mRNA.	7.61255	0.000171278	0.00136249	NaN	0.633556	3.88939	806.683	335.661	3137.5	580.643
671	785	Nkx3.1CE2/+; Ptenf/f intact-veh	GADD45A	Mus musculus groNkx3.1CE2/+h arrest and DNA-damage-inducible 45 alpha (Gadd45a), mRNA.	7.61178	0.000359286	0.00185434	NaN	1	4.63934	436.322	91.2691	2024.25	494.429
672	786	Nkx3.1CE2/+; Ptenf/f intact-veh	AVPI1	Mus musculus arginine vasopressin-induced 1 (Avpi1), mRNA.	7.61091	0.000276965	0.00168267	NaN	1	3.76562	486.291	95.2754	1831.19	411.334
673	787	Nkx3.1CE2/+; Ptenf/f intact-veh	RNF208	Mus musculus ring finger protein 208 (Rnf208), mRNA.	7.60465	0.000485257	0.00221055	NaN	1	3.67354	205.163	21.1874	753.675	174.119
674	788	Nkx3.1CE2/+; Ptenf/f intact-veh	MAP3K1	Mus musculus mitogen-activated protein kinase kinase kinase 1 (Map3k1), mRNA.	7.60038	0.000624512	0.0026073	NaN	1	5.64786	1168.49	22.1014	6599.48	1750.05
675	789	Nkx3.1CE2/+; Ptenf/f intact-veh	CIB1	Mus musculus calcium and integrin binding 1 (calmyrin) (Cib1), mRNA.	7.59833	0.000356591	0.00185104	NaN	1	2.71258	2911.83	291.707	7898.57	1553.75
676	790	Nkx3.1CE2/+; Ptenf/f intact-veh	STK38L	Mus musculus serine/threonine kinase 38 like (Stk38l), mRNA.	7.59461	0.000141926	0.00127115	NaN	0.524985	2.57038	241.434	40.3722	620.579	108.138
677	791	Nkx3.1CE2/+; Ptenf/f intact-veh	SLC44A1	Mus musculus solute carrier family 44, member 1 (Slc44a1), mRNA.	7.58418	0.000463111	0.00215749	NaN	1	4.33765	202.233	29.1405	877.219	214.072
678	792	Nkx3.1CE2/+; Ptenf/f intact-veh	REEP6	Mus musculus receptor accessory protein 6 (Reep6), mRNA.	7.58316	0.000279088	0.00168267	NaN	1	3.35556	566.814	95.7371	1901.98	409.478
679	793	Nkx3.1CE2/+; Ptenf/f intact-veh	CAPZA1	Mus musculus capping protein (actin filament) muscle Z-line, alpha 1 (Capza1), mRNA.	7.58302	0.000414289	0.00200898	NaN	1	2.96544	196.253	19.4972	581.977	121.508
680	794	Nkx3.1CE2/+; Ptenf/f intact-veh	NFE2L3	NULL	7.57398	0.000525269	0.00234248	NaN	1	3.85208	212.05	20.4656	816.833	193.439
681	795	Nkx3.1CE2/+; Ptenf/f intact-veh	CTDSPL	Mus musculus CTD (carboxy-terminal domain, RNA polymerase II, polypeptide A) small phosphatase-like (Ctdspl), mRNA.	7.57255	0.000343078	0.00180518	NaN	1	3.94383	511.599	92.978	2017.66	469.084
682	797	Nkx3.1CE2/+; Ptenf/f intact-veh	HES1	Mus musculus hairy and enhancer of split 1 (Drosophila) (Hes1), mRNA.	7.57065	0.000145785	0.00128395	NaN	0.539258	3.07109	1100.34	242.204	3379.24	652.95
683	798	Nkx3.1CE2/+; Ptenf/f intact-veh	LOC100047934	PREDICTED: Mus musculus hypothetical protein LOC100047934 (LOC100047934), mRNA.	7.56966	0.000636285	0.00262974	NaN	1	28.686	209.857	24.5435	6019.97	1879.79
684	799	Nkx3.1CE2/+; Ptenf/f intact-veh	CATNB	NULL	7.56197	0.000316695	0.00175755	NaN	1	2.94401	212.736	27.4459	626.298	128.216
685	800	Nkx3.1CE2/+; Ptenf/f intact-veh	POF1B	Mus musculus premature ovarian failure 1B (Pof1b), mRNA.	7.56062	0.000613875	0.00257451	NaN	1	3.01032	420.544	13.7484	1265.97	273.211
686	801	Nkx3.1CE2/+; Ptenf/f intact-veh	BACE2	Mus musculus beta-site APP-cleaving enzyme 2 (Bace2), mRNA.	7.55984	0.000607091	0.00255767	NaN	1	18.4298	477.49	152.038	8800.01	2688.02
687	802	Nkx3.1CE2/+; Ptenf/f intact-veh	PCBD1	Mus musculus pterin 4 alpha carbinolamine dehydratase/dimerization cofactor of hepatocyte nuclear factor 1 alpha (TCF1) 1 (Pcbd1), mRNA.	7.55741	0.000309561	0.00173769	NaN	1	2.21921	257.534	21.2645	571.522	97.2243
688	804	Nkx3.1CE2/+; Ptenf/f intact-veh	FBXO28	Mus musculus F-box protein 28 (Fbxo28), mRNA.	7.55656	0.000240397	0.00157108	NaN	0.889229	2.3314	620.767	126.979	1447.25	198.816
689	805	Nkx3.1CE2/+; Ptenf/f intact-veh	IL1RN	Mus musculus interleukin 1 receptor antagonist (Il1rn), transcript variant 2, mRNA.	7.55531	0.000640327	0.00263317	NaN	1	9.82484	133.133	6.73339	1308.01	380.785
690	808	Nkx3.1CE2/+; Ptenf/f intact-veh	D030022P06RIK	PREDICTED: Mus musculus RIKEN cDNA D030022P06 gene (D030022P06Rik), mRNA.	7.52802	0.000230333	0.00155192	NaN	0.852003	2.25038	542.067	103.401	1219.86	165.089
691	810	Nkx3.1CE2/+; Ptenf/f intact-veh	ABR	Mus musculus active BCR-related gene (Abr), transcript variant 3, mRNA.	7.52604	0.000339835	0.00180093	NaN	1	2.40671	657.176	149.423	1581.63	214.184
692	812	Nkx3.1CE2/+; Ptenf/f intact-veh	SPSB1	Mus musculus splA/ryanodine receptor domain and SOCS box containing 1 (Spsb1), mRNA.	7.51675	0.000530637	0.00234788	NaN	1	4.60671	228.57	30.024	1052.95	265.266
693	813	Nkx3.1CE2/+; Ptenf/f intact-veh	LOC100047579	PREDICTED: Mus musculus similar to transmembrane protein 20 (LOC100047579), mRNA.	7.51565	0.000641141	0.00263317	NaN	1	18.3026	226.225	51.6261	4140.51	1273.65
694	815	Nkx3.1CE2/+; Ptenf/f intact-veh	LOC270186	NULL	7.51148	0.000144351	0.00128042	NaN	0.533955	2.85078	340.407	70.6051	970.426	179.552
695	816	Nkx3.1CE2/+; Ptenf/f intact-veh	LMNB1	Mus musculus lamin B1 (Lmnb1), mRNA.	7.50937	0.000653572	0.00266545	NaN	1	3.79372	149.67	3.77193	567.804	136.288
696	817	Nkx3.1CE2/+; Ptenf/f intact-veh	OAS1G	Mus musculus 2'-5' oligoadenylate synthetase 1G (Oas1g), mRNA.	7.50429	0.000648999	0.00265265	NaN	1	29.7309	218.589	75.2048	6498.84	2047.19
697	818	Nkx3.1CE2/+; Ptenf/f intact-veh	2010016I18RIK	NULL	7.50129	0.000644167	0.00263846	NaN	1	5.42428	146.322	9.16632	793.693	210.996
698	819	Nkx3.1CE2/+; Ptenf/f intact-veh	SLC23A3	Mus musculus solute carrier family 23 (nucleobase transporters), member 3 (Slc23a3), mRNA.	7.49512	0.000359439	0.00185434	NaN	1	3.80299	156.086	27.468	593.595	137.605
699	820	Nkx3.1CE2/+; Ptenf/f intact-veh	TNFSF13B	Mus musculus tumor necrosis factor (ligand) superfamily, member 13b (Tnfsf13b), mRNA.	7.49262	0.000426627	0.00204557	NaN	1	3.18306	180.516	20.9295	574.594	125.386
700	821	Nkx3.1CE2/+; Ptenf/f intact-veh	LOC100046586	PREDICTED: Mus musculus similar to loop-tail protein 2 (LOC100046586), mRNA.	7.49206	0.000139412	0.00126021	NaN	0.515685	2.30933	149.418	23.371	345.057	54.7618
701	822	Nkx3.1CE2/+; Ptenf/f intact-veh	ARHGEF2	NULL	7.48558	0.000467397	0.00216926	NaN	1	2.68481	145.445	11.6698	390.493	78.4697
702	823	Nkx3.1CE2/+; Ptenf/f intact-veh	SGPL1	Mus musculus sphingosine phosphate lyase 1 (Sgpl1), mRNA.	7.48124	0.000594548	0.00252495	NaN	1	3.06482	328.478	18.8656	1006.73	220.462
703	824	Nkx3.1CE2/+; Ptenf/f intact-veh	ELK3	NULL	7.47275	0.000666105	0.00270298	NaN	1	4.00551	624.176	19.2713	2500.14	614.318
704	825	Nkx3.1CE2/+; Ptenf/f intact-veh	IRF2	Mus musculus interferon regulatory factor 2 (Irf2), mRNA.	7.46994	0.000148363	0.00128825	NaN	0.548796	2.43025	2881.13	467.428	7001.86	1178.51
705	826	Nkx3.1CE2/+; Ptenf/f intact-veh	OSMR	Mus musculus oncostatin M receptor (Osmr), mRNA.	7.46281	0.000653499	0.00266545	NaN	1	5.68743	230.76	17.5271	1312.43	354.168
706	827	Nkx3.1CE2/+; Ptenf/f intact-veh	RGS3	Mus musculus regulator of G-protein signaling 3 (Rgs3), transcript variant 3, mRNA.	7.46275	0.000579303	0.00248878	NaN	1	2.70779	200.683	10.9137	543.407	111.428
707	828	Nkx3.1CE2/+; Ptenf/f intact-veh	LOC100038882	PREDICTED: Mus musculus hypothetical protein LOC100038882 (LOC100038882), mRNA.	7.46224	0.0006809	0.00274694	NaN	1	13.9838	161.11	6.80839	2252.94	686.577
708	829	Nkx3.1CE2/+; Ptenf/f intact-veh	KLRG2	Mus musculus killer cell lectin-like receptor subfamily G, member 2 (Klrg2), mRNA.	7.46204	0.000310051	0.00173769	NaN	1	2.66066	137.234	16.4101	365.133	71.1194
709	830	Nkx3.1CE2/+; Ptenf/f intact-veh	AMDHD2	Mus musculus amidohydrolase domain containing 2 (Amdhd2), mRNA.	7.46045	0.000277116	0.00168267	NaN	1	2.41384	647.987	71.1779	1564.13	283.456
710	831	Nkx3.1CE2/+; Ptenf/f intact-veh	HIST1H2BC	Mus musculus histone cluster 1, H2bc (Hist1h2bc), mRNA.	7.45627	0.000144169	0.00128042	NaN	0.53328	2.67889	3853.72	833.889	10323.7	1768.3
711	832	Nkx3.1CE2/+; Ptenf/f intact-veh	SCNN1A	Mus musculus sodium channel, nonvoltage-gated 1 alpha (Scnn1a), mRNA.	7.45247	0.000682973	0.00274694	NaN	1	14.6476	205.119	15.213	3004.5	919.854
712	833	Nkx3.1CE2/+; Ptenf/f intact-veh	LOC100045250	PREDICTED: Mus musculus hypothetical protein LOC100045250 (LOC100045250), misc RNA.	7.44816	0.000683208	0.00274694	NaN	1	61.8617	218.956	88.5344	13545	4380.77
713	834	Nkx3.1CE2/+; Ptenf/f intact-veh	EBPL	Mus musculus emopamil binding protein-like (Ebpl), mRNA.	7.44479	0.000403661	0.00198229	NaN	1	2.29949	1937.11	147.752	4454.38	801.44
714	835	Nkx3.1CE2/+; Ptenf/f intact-veh	C77080	Mus musculus expressed sequence C77080 (C77080), mRNA.	7.44477	0.000274041	0.0016755	NaN	1	3.54415	1442.1	289.814	5111.01	1135.44
715	836	Nkx3.1CE2/+; Ptenf/f intact-veh	RAP1GAP	Mus musculus Rap1 GTPase-activating protein (Rap1gap), mRNA.	7.44109	0.000686926	0.00274879	NaN	1	14.3991	153.252	12.6476	2206.7	675.726
716	837	Nkx3.1CE2/+; Ptenf/f intact-veh	LOC100048346	PREDICTED: Mus musculus similar to ubiquitin specific protease UBP43 (LOC100048346), mRNA.	7.43821	0.000687028	0.00274879	NaN	1	29.2472	213.853	41.9607	6254.59	1988.4
717	838	Nkx3.1CE2/+; Ptenf/f intact-veh	AUTS2	PREDICTED: Mus musculus autism susceptibility candidate 2 (Auts2), mRNA.	7.43726	0.00027644	0.00168267	NaN	1	2.15426	158.319	14.4217	341.061	56.6255
718	839	Nkx3.1CE2/+; Ptenf/f intact-veh	TRIM6	Mus musculus tripartite motif-containing 6 (Trim6), mRNA.	7.43584	0.000540927	0.00236849	NaN	1	2.84697	150.673	11.0236	428.962	90.3376
719	840	Nkx3.1CE2/+; Ptenf/f intact-veh	PDZK1IP1	Mus musculus PDZK1 interacting protein 1 (Pdzk1ip1), mRNA.	7.43244	0.000147204	0.00128825	NaN	0.544506	2.37288	966.168	158.503	2292.6	375.304
720	841	Nkx3.1CE2/+; Ptenf/f intact-veh	CCDC120	Mus musculus coiled-coil domain containing 120 (Ccdc120), mRNA.	7.42836	0.000541656	0.00236849	NaN	1	2.31641	1081.42	56.8604	2505.02	462.491
721	842	Nkx3.1CE2/+; Ptenf/f intact-veh	PSAPL1	Mus musculus prosaposin-like 1 (Psapl1), mRNA.	7.42328	0.000666449	0.00270298	NaN	1	6.3753	127.918	11.8797	815.517	226.267
722	843	Nkx3.1CE2/+; Ptenf/f intact-veh	D17H6S56E-5	Mus musculus DNA segment, Chr 17, human D6S56E 5 (D17H6S56E-5), mRNA.	7.42176	0.000696358	0.00277568	NaN	1	32.4255	200.921	33.6639	6514.94	2083.35
723	845	Nkx3.1CE2/+; Ptenf/f intact-veh	VPS37B	Mus musculus vacuolar protein sorting 37B (yeast) (Vps37b), mRNA.	7.41248	0.000267647	0.00165556	NaN	0.990026	2.70032	888.123	123.422	2398.21	467.494
724	846	Nkx3.1CE2/+; Ptenf/f intact-veh	RBMS3	Mus musculus RNA binding motif, single stranded interacting protein (Rbms3), mRNA.	7.41153	0.000205304	0.00146324	NaN	0.759421	2.6397	554.127	86.6854	1462.73	274.127
725	847	Nkx3.1CE2/+; Ptenf/f intact-veh	CACNA1D	Mus musculus calcium channel, voltage-dependent, L type, alpha 1D subunit (Cacna1d), transcript variant 2, mRNA.	7.41069	0.000687592	0.00274879	NaN	1	6.15856	394.57	25.1178	2429.98	671.836
726	848	Nkx3.1CE2/+; Ptenf/f intact-veh	SLC16A13	Mus musculus solute carrier family 16 (monocarboxylic acid transporters), member 13 (Slc16a13), mRNA.	7.40745	0.000606205	0.00255684	NaN	1	2.28237	178.3	7.11142	406.947	74.9371
727	849	Nkx3.1CE2/+; Ptenf/f intact-veh	HOXB7	Mus musculus homeo box B7 (Hoxb7), mRNA.	7.40307	0.00039703	0.00196745	NaN	1	2.25982	1152.82	89.5284	2605.17	463.564
728	850	Nkx3.1CE2/+; Ptenf/f intact-veh	D330025A21RIK	NULL	7.39099	0.000150672	0.00129013	NaN	0.557335	2.31353	155.489	25.8164	359.729	56.9976
729	851	Nkx3.1CE2/+; Ptenf/f intact-veh	DCBLD1	Mus musculus discoidin, CUB and LCCL domain containing 1 (Dcbld1), mRNA.	7.39059	0.000334281	0.00179804	NaN	1	3.24795	203.709	32.75	661.637	144.533
730	852	Nkx3.1CE2/+; Ptenf/f intact-veh	TSC22D1	Mus musculus TSC22 domain family, member 1 (Tsc22d1), transcript variant 2, mRNA.	7.3836	0.000239561	0.00157108	NaN	0.886137	3.50068	429.582	95.3846	1503.83	329.863
731	853	Nkx3.1CE2/+; Ptenf/f intact-veh	MORC3	Mus musculus microrchidia 3 (Morc3), mRNA. XM_978468 XM_978538 XM_978584 XM_978615	7.38104	0.000386464	0.00194229	NaN	1	3.32602	701.847	104.828	2334.36	521.09
732	856	Nkx3.1CE2/+; Ptenf/f intact-veh	6330442E10RIK	Mus musculus RIKEN cDNA 6330442E10 gene (6330442E10Rik), mRNA.	7.34306	0.000637897	0.00263052	NaN	1	3.0629	245.918	15.4227	753.222	167.814
733	857	Nkx3.1CE2/+; Ptenf/f intact-veh	OMP	Mus musculus olfactory marker protein (Omp), mRNA.	7.33924	0.000691836	0.00276063	NaN	1	2.3992	183.387	5.1925	439.982	85.3238
734	858	Nkx3.1CE2/+; Ptenf/f intact-veh	RASSF7	Mus musculus Ras association (RalGDS/AF-6) domain family (N-terminal) member 7 (Rassf7), mRNA.	7.33337	0.000571103	0.00246213	NaN	1	3.13399	677.824	59.7047	2124.3	475.715
735	859	Nkx3.1CE2/+; Ptenf/f intact-veh	MPHOSPH6	Mus musculus M phase phosphoprotein 6 (Mphosph6), mRNA.	7.33294	0.000563325	0.00243997	NaN	1	2.39201	538.981	31.8117	1289.25	246.547
736	860	Nkx3.1CE2/+; Ptenf/f intact-veh	BC018371	NULL	7.33124	0.000568003	0.00245421	NaN	1	2.53053	219.862	14.0801	556.366	110.654
737	861	Nkx3.1CE2/+; Ptenf/f intact-veh	SLC12A7	NULL	7.32118	0.000709954	0.00281773	NaN	1	4.73899	169.812	11.3169	804.739	211.827
738	862	Nkx3.1CE2/+; Ptenf/f intact-veh	RGMA	Mus musculus RGM domain family, member A (Rgma), mRNA.	7.31542	0.000583074	0.0024934	NaN	1	2.78735	207.288	15.0636	577.784	122.214
739	863	Nkx3.1CE2/+; Ptenf/f intact-veh	DDIT4	Mus musculus DNA-damage-inducible transcript 4 (Ddit4), mRNA.	7.29256	0.000737394	0.00289249	NaN	1	3.00541	791.078	21.873	2377.52	531.969
740	864	Nkx3.1CE2/+; Ptenf/f intact-veh	TMC4	Mus musculus transmembrane channel-like gene family 4 (Tmc4), mRNA.	7.28882	0.000503235	0.00227008	NaN	1	3.13516	1812.57	204.999	5682.7	1267.88
741	866	Nkx3.1CE2/+; Ptenf/f intact-veh	AHNAK2	Mus musculus AHNAK nucleoprotein 2 (Ahnak2), mRNA.	7.28639	0.000556732	0.00241425	NaN	1	3.48641	229.344	26.2337	799.589	188.077
742	867	Nkx3.1CE2/+; Ptenf/f intact-veh	ZFHX2	Mus musculus zinc finger homeobox 2 (Zfhx2), mRNA.	7.28354	0.000248005	0.00159275	NaN	0.917372	2.44196	390.278	51.9782	953.044	174.402
743	868	Nkx3.1CE2/+; Ptenf/f intact-veh	PDK3	Mus musculus pyruvate dehydrogenase kinase, isoenzyme 3 (Pdk3), mRNA.	7.28139	0.000293424	0.00169969	NaN	1	2.45658	634.234	77.2722	1558.05	290.928
744	869	Nkx3.1CE2/+; Ptenf/f intact-veh	MBP	Mus musculus myelin basic protein (Mbp), transcript variant 7, mRNA.	7.27798	0.000609942	0.00256383	NaN	1	3.34604	997.262	91.6155	3336.88	776.695
745	870	Nkx3.1CE2/+; Ptenf/f intact-veh	ORF9	Mus musculus open reading frame 9 (ORF9), mRNA.	7.27311	0.00072489	0.00286311	NaN	1	10.4981	198.356	37.1559	2082.35	632.326
746	871	Nkx3.1CE2/+; Ptenf/f intact-veh	HIST1H2BK	Mus musculus histone cluster 1, H2bk (Hist1h2bk), mRNA.	7.27297	0.000588763	0.00251192	NaN	1	3.37938	890.961	89.963	3010.89	702.553
747	872	Nkx3.1CE2/+; Ptenf/f intact-veh	PPP1R9B	Mus musculus protein phosphatase 1, regulatory subunit 9B (Ppp1r9b), mRNA.	7.27011	0.000762739	0.00296052	NaN	1	3.6328	291.95	6.01814	1060.6	258.838
748	873	Nkx3.1CE2/+; Ptenf/f intact-veh	ECE1	Mus musculus endothelin converting enzyme 1 (Ece1), mRNA.	7.26111	0.000483679	0.00220716	NaN	1	3.49006	334.013	47.4001	1165.73	272.447
749	874	Nkx3.1CE2/+; Ptenf/f intact-veh	NEDD4L	Mus musculus neural precursor cell expressed, developmentally down-regulated gene 4-like (Nedd4l), mRNA.	7.25734	0.000168868	0.00135204	NaN	0.624642	3.99224	630.015	239.74	2515.17	538.42
750	875	Nkx3.1CE2/+; Ptenf/f intact-veh	STK24	NULL	7.25413	0.000239275	0.00157108	NaN	0.885077	2.48658	814.114	116.185	2024.36	374.174
751	876	Nkx3.1CE2/+; Ptenf/f intact-veh	DSCR6	Mus musculus Down syndrome critical region homolog 6 (human) (Dscr6), mRNA.	7.25243	0.000760386	0.00295759	NaN	1	14.2957	178.815	29.9272	2556.29	801.868
752	877	Nkx3.1CE2/+; Ptenf/f intact-veh	AI427122	NULL	7.24984	0.000768953	0.00296956	NaN	1	6.46805	138.503	7.35023	895.844	255.67
753	878	Nkx3.1CE2/+; Ptenf/f intact-veh	2810474O19RIK	Mus musculus RIKEN cDNA 2810474O19 gene (2810474O19Rik), mRNA.	7.24932	0.000182456	0.00138778	NaN	0.674906	2.36608	240.822	45.878	569.804	90.2612
754	879	Nkx3.1CE2/+; Ptenf/f intact-veh	SLC31A1	Mus musculus solute carrier family 31, member 1 (Slc31a1), mRNA.	7.24568	0.000380724	0.00192128	NaN	1	2.6579	1162.54	138.185	3089.92	621.576
755	880	Nkx3.1CE2/+; Ptenf/f intact-veh	MTA2	Mus musculus metastasis-associated gene family, member 2 (Mta2), mRNA.	7.24289	0.000187794	0.00140797	NaN	0.694649	2.36875	1509.32	232.877	3575.2	616.173
757	882	Nkx3.1CE2/+; Ptenf/f intact-veh	ZFP64	NULL	7.2395	0.000172523	0.0013636	NaN	0.638163	2.27437	362.938	60.788	825.455	130.766
758	883	Nkx3.1CE2/+; Ptenf/f intact-veh	RNF145	Mus musculus ring finger protein 145 (Rnf145), mRNA.	7.23674	0.000393365	0.00196364	NaN	1	3.21084	828.697	128.894	2660.81	592.738
759	884	Nkx3.1CE2/+; Ptenf/f intact-veh	AI661453	NULL	7.23674	0.000308987	0.00173769	NaN	1	2.80972	520.166	151.207	1461.52	236.215
761	886	Nkx3.1CE2/+; Ptenf/f intact-veh	D630022O22RIK	NULL	7.23213	0.000745412	0.00291467	NaN	1	7.27981	125.311	15.4106	912.24	265.637
762	887	Nkx3.1CE2/+; Ptenf/f intact-veh	NIPA1	Mus musculus non imprinted in Prader-Willi/Angelman syndrome 1 homolog (human) (Nipa1), mRNA.	7.23032	0.000173451	0.00136735	NaN	0.641597	2.19405	218.47	32.6834	479.334	75.3247
763	888	Nkx3.1CE2/+; Ptenf/f intact-veh	H2-Q5	Mus musculus histocompatibility 2, Q region locus 5 (H2-Q5), mRNA.	7.22903	0.00075357	0.00294035	NaN	1	6.29891	2404.43	229.07	15145.3	4304.94
764	889	Nkx3.1CE2/+; Ptenf/f intact-veh	PIK3C3	Mus musculus phosphoinositide-3-kinase, class 3 (Pik3c3), mRNA.	7.22359	0.000590302	0.00251559	NaN	1	3.23773	983.398	99.4406	3183.98	732.835
765	890	Nkx3.1CE2/+; Ptenf/f intact-veh	TMEM184B	Mus musculus transmembrane protein 184b (Tmem184b), mRNA.	7.21749	0.000260465	0.00162472	NaN	0.963462	3.08865	2016.32	393.432	6227.7	1316.52
766	891	Nkx3.1CE2/+; Ptenf/f intact-veh	XCL1	Mus musculus chemokine (C motif) ligand 1 (Xcl1), mRNA.	7.2121	0.000183291	0.00138778	NaN	0.677992	2.37761	129.657	21.1385	308.273	52.7875
767	893	Nkx3.1CE2/+; Ptenf/f intact-veh	CD14	Mus musculus CD14 antigen (Cd14), mRNA.	7.20884	0.000800437	0.0030587	NaN	1	25.7924	288.799	5.26642	7448.83	2432.89
768	894	Nkx3.1CE2/+; Ptenf/f intact-veh	CLIC6	Mus musculus chloride intracellular channel 6 (Clic6), mRNA.	7.20677	0.000774588	0.00298458	NaN	1	21.3628	176.642	55.1522	3773.57	1220.06
770	897	Nkx3.1CE2/+; Ptenf/f intact-veh	NET1	Mus musculus neuroepithelial cell transforming gene 1 (Net1), transcript variant 2, mRNA.	7.19603	0.0006229	0.00260351	NaN	1	4.68076	274.368	42.952	1284.25	338.35
771	898	Nkx3.1CE2/+; Ptenf/f intact-veh	D12ERTD647E	Mus musculus DNA segment, Chr 12, ERATO Doi 647, expressed (D12Ertd647e), transcript variant 4, mRNA.	7.18679	0.000304741	0.0017284	NaN	1	2.87861	5964.3	1795.6	17168.9	2852.27
772	899	Nkx3.1CE2/+; Ptenf/f intact-veh	LOC100045950	PREDICTED: Mus musculus similar to ets variant gene 3 (LOC100045950), mRNA.	7.18411	0.000323239	0.00177135	NaN	1	2.24433	257.132	26.7639	577.089	102.316
773	900	Nkx3.1CE2/+; Ptenf/f intact-veh	TANK	Mus musculus TRAF family member-associated Nf-kappa B activator (Tank), mRNA.	7.18044	0.00018689	0.0014051	NaN	0.691308	2.61571	433.981	96.3382	1135.17	196.605
774	901	Nkx3.1CE2/+; Ptenf/f intact-veh	CASP8	Mus musculus caspase 8 (Casp8), transcript variant 2, mRNA.	7.17686	0.000632875	0.00262445	NaN	1	3.75993	706.596	82.6952	2656.75	655.239
775	903	Nkx3.1CE2/+; Ptenf/f intact-veh	MFAP3L	Mus musculus microfibrillar-associated protein 3-like (Mfap3l), mRNA.	7.16237	0.000686115	0.00274879	NaN	1	2.62189	151.844	8.87164	398.118	83.2845
776	904	Nkx3.1CE2/+; Ptenf/f intact-veh	PGCP	Mus musculus plasma glutamate carboxypeptidase (Pgcp), transcript variant 2, mRNA.	7.15886	0.000309812	0.00173769	NaN	1	3.02369	686.178	121.207	2074.79	443.132
777	905	Nkx3.1CE2/+; Ptenf/f intact-veh	PLEKHG6	Mus musculus pleckstrin homology domain containing, family G (with RhoGef domain) member 6 (Plekhg6), mRNA.	7.15881	0.000322827	0.00177135	NaN	1	3.24618	154.135	29.4537	500.35	110.898
778	907	Nkx3.1CE2/+; Ptenf/f intact-veh	CD276	Mus musculus CD276 antigen (Cd276), mRNA.	7.15349	0.000805538	0.00306552	NaN	1	5.54694	135.277	8.82807	750.373	210.25
779	909	Nkx3.1CE2/+; Ptenf/f intact-veh	PLCH2	Mus musculus phospholipase C, eta 2 (Plch2), transcript variant 1, mRNA.	7.15242	0.000438615	0.00207739	NaN	1	3.46931	547.394	92.6326	1899.08	443.989
780	910	Nkx3.1CE2/+; Ptenf/f intact-veh	BC023892	PREDICTED: Mus musculus cDNA sequence BC023892, transcript variant 2 (BC023892), mRNA.	7.15044	0.000471166	0.00217611	NaN	1	3.74482	724.865	128.156	2714.49	657.036
781	911	Nkx3.1CE2/+; Ptenf/f intact-veh	LOC100047915	PREDICTED: Mus musculus similar to Memo1 protein (LOC100047915), mRNA.	7.14731	0.000229717	0.00155059	NaN	0.849725	3.84088	273.438	81.7566	1050.24	239.804
782	913	Nkx3.1CE2/+; Ptenf/f intact-veh	MAP3K7IP1	Mus musculus mitogen-activated protein kinase kinase kinase 7 interacting protein 1 (Map3k7ip1), mRNA.	7.14075	0.000395188	0.00196479	NaN	1	2.20991	1143.65	103.833	2527.36	451.368
783	914	Nkx3.1CE2/+; Ptenf/f intact-veh	ACAA2	Mus musculus acetyl-Coenzyme A acyltransferase 2 (mitochondrial 3-oxoacyl-Coenzyme A thiolase) (Acaa2), mRNA.	7.13778	0.000191322	0.00142109	NaN	0.707702	2.94653	857.169	227.543	2525.67	473.604
784	915	Nkx3.1CE2/+; Ptenf/f intact-veh	CYTIP	Mus musculus cytohesin 1 interacting protein (Cytip), mRNA.	7.13766	0.000422049	0.00203276	NaN	1	2.26785	978.392	209.542	2218.85	305.618
785	918	Nkx3.1CE2/+; Ptenf/f intact-veh	FGFR3	Mus musculus fibroblast groNkx3.1CE2/+h factor receptor 3 (Fgfr3), mRNA.	7.12373	0.000740733	0.00289944	NaN	1	4.16343	134.194	13.0599	558.707	144.795
786	919	Nkx3.1CE2/+; Ptenf/f intact-veh	GLT25D1	Mus musculus glycosyltransferase 25 domain containing 1 (Glt25d1), mRNA.	7.11748	0.000487071	0.00221608	NaN	1	2.35169	1849.63	160.388	4349.75	829.984
787	920	Nkx3.1CE2/+; Ptenf/f intact-veh	BC017612	Mus musculus cDNA sequence BC017612 (BC017612), mRNA.	7.10569	0.000765258	0.00296142	NaN	1	5.09632	247.6	28.7327	1261.85	347.265
788	921	Nkx3.1CE2/+; Ptenf/f intact-veh	A230050P20RIK	Mus musculus RIKEN cDNA A230050P20 gene (A230050P20Rik), mRNA.	7.10499	0.000602592	0.00254654	NaN	1	4.21875	726.642	118.446	3065.52	788.752
789	922	Nkx3.1CE2/+; Ptenf/f intact-veh	ARL14	PREDICTED: Mus musculus ADP-ribosylation factor-like 14 (Arl14), mRNA.	7.09687	0.000847579	0.0031591	NaN	1	8.93696	130.685	10.8177	1167.93	357.678
790	923	Nkx3.1CE2/+; Ptenf/f intact-veh	2310036D04RIK	NULL	7.09021	0.00030275	0.00172172	NaN	1	2.18266	699.209	132.199	1526.13	216.012
791	924	Nkx3.1CE2/+; Ptenf/f intact-veh	LOC636952	PREDICTED: Mus musculus similar to HIStone family member (his-71) (LOC636952), misc RNA.	7.08022	0.000298721	0.00172113	NaN	1	2.21058	2040.02	393.626	4509.64	648.158
792	925	Nkx3.1CE2/+; Ptenf/f intact-veh	PMEPA1	Mus musculus prostate transmembrane protein, androgen induced 1 (Pmepa1), mRNA.	7.07063	0.000807346	0.00306924	NaN	1	5.94542	172.002	20.6499	1022.62	293.231
793	926	Nkx3.1CE2/+; Ptenf/f intact-veh	ZMYND15	Mus musculus zinc finger, MYND-type containing 15 (Zmynd15), mRNA.	7.06814	0.000555241	0.00241061	NaN	1	2.22984	136.313	9.80746	303.957	56.4177
794	927	Nkx3.1CE2/+; Ptenf/f intact-veh	BRRN1	NULL	7.06551	0.000593059	0.00252443	NaN	1	2.77632	135.238	12.9994	375.465	81.2279
795	928	Nkx3.1CE2/+; Ptenf/f intact-veh	UGT1A10	Mus musculus UDP glycosyltransferase 1 family, polypeptide A10 (Ugt1a10), mRNA.	7.06341	0.000829492	0.0031297	NaN	1	10.9299	755.488	155.06	8257.41	2592.3
796	929	Nkx3.1CE2/+; Ptenf/f intact-veh	LOC223672	NULL	7.057	0.000877524	0.00323625	NaN	1	23.0124	133.675	20.1009	3076.19	1020.95
797	930	Nkx3.1CE2/+; Ptenf/f intact-veh	NFKBIA	Mus musculus nuclear factor of kappa light polypeptide gene enhancer in B-cells inhibitor, alpha (Nfkbia), mRNA.	7.05082	0.000492885	0.00223978	NaN	1	3.3594	1356.39	214.537	4556.67	1069.59
798	931	Nkx3.1CE2/+; Ptenf/f intact-veh	PLAT	Mus musculus plasminogen activator, tissue (Plat), mRNA.	7.03811	0.000787615	0.00301997	NaN	1	8.19237	217.997	48.066	1785.91	541.433
799	932	Nkx3.1CE2/+; Ptenf/f intact-veh	FMNL3	Mus musculus formin-like 3 (Fmnl3), mRNA.	7.034	0.000855834	0.0031689	NaN	1	4.63325	269.291	18.131	1247.69	339.748
800	933	Nkx3.1CE2/+; Ptenf/f intact-veh	SLC6A8	Mus musculus solute carrier family 6 (neurotransmitter transporter, creatine), member 8 (Slc6a8), mRNA.	7.03281	0.000728661	0.00287347	NaN	1	4.64561	921.197	132.344	4279.52	1154.62
801	934	Nkx3.1CE2/+; Ptenf/f intact-veh	CERCAM	Mus musculus cerebral endothelial cell adhesion molecule (Cercam), mRNA.	7.025	0.000480963	0.00220184	NaN	1	3.61448	196.183	35.8695	709.102	171.5
802	936	Nkx3.1CE2/+; Ptenf/f intact-veh	NIN	Mus musculus ninein (Nin), transcript variant 2, mRNA.	7.02203	0.000285293	0.00168993	NaN	1	2.90138	337.926	64.2848	980.45	204.865
803	938	Nkx3.1CE2/+; Ptenf/f intact-veh	2700084L06RIK	NULL	7.0126	0.00072526	0.00286311	NaN	1	2.80261	1463.47	108.885	4101.54	908.517
804	939	Nkx3.1CE2/+; Ptenf/f intact-veh	LOC672274	PREDICTED: Mus musculus similar to Transcription factor SOX-4 (LOC672274), mRNA.	7.01248	0.000439442	0.00207864	NaN	1	2.25442	122.147	11.634	275.37	50.9297
805	940	Nkx3.1CE2/+; Ptenf/f intact-veh	9430080K19RIK	NULL	7.0093	0.000720796	0.00285463	NaN	1	3.04885	747.835	64.4609	2280.03	527.63
806	941	Nkx3.1CE2/+; Ptenf/f intact-veh	INDO	Mus musculus indoleamine-pyrrole 2,3 dioxygenase (Indo), mRNA.	7.00422	0.000893587	0.00327915	NaN	1	13.5056	160.173	26.1697	2163.23	699.524
807	942	Nkx3.1CE2/+; Ptenf/f intact-veh	2610319H10RIK	NULL	7.00246	0.000637261	0.00263052	NaN	1	2.54045	329.287	26.6892	836.538	173.378
808	943	Nkx3.1CE2/+; Ptenf/f intact-veh	TAPBP	NULL	6.99771	0.000508151	0.00228668	NaN	1	3.31596	330.746	52.1644	1096.74	257.782
809	944	Nkx3.1CE2/+; Ptenf/f intact-veh	GPR120	Mus musculus G protein-coupled receptor 120 (Gpr120), mRNA.	6.99729	0.000915008	0.00333131	NaN	1	18.6324	125.813	11.6539	2344.2	776.401
810	945	Nkx3.1CE2/+; Ptenf/f intact-veh	SOX9	Mus musculus SRY-box containing gene 9 (Sox9), mRNA.	6.99344	0.000688126	0.00274879	NaN	1	4.26916	3221.46	496.551	13752.9	3621.24
811	946	Nkx3.1CE2/+; Ptenf/f intact-veh	LY6G6E	Mus musculus lymphocyte antigen 6 complex, locus G6E (Ly6g6e), mRNA.	6.97047	0.000776126	0.0029874	NaN	1	3.85725	397.777	42.8887	1534.33	394.762
812	947	Nkx3.1CE2/+; Ptenf/f intact-veh	8430408G22RIK	Mus musculus RIKEN cDNA 8430408G22 gene (8430408G22Rik), mRNA.	6.97042	0.000283058	0.00168993	NaN	1	3.08236	230.027	49.8156	709.025	152.874
813	948	Nkx3.1CE2/+; Ptenf/f intact-veh	KRT4	Mus musculus keratin 4 (Krt4), mRNA.	6.96094	0.000940078	0.00338718	NaN	1	25.2025	146.552	7.62994	3693.48	1248.08
814	949	Nkx3.1CE2/+; Ptenf/f intact-veh	C130045I22RIK	NULL	6.95975	0.000242633	0.00157855	NaN	0.897501	2.41848	193.756	31.945	468.596	85.5321
815	950	Nkx3.1CE2/+; Ptenf/f intact-veh	TMEM38B	Mus musculus transmembrane protein 38B (Tmem38b), mRNA.	6.95861	0.000287229	0.00168993	NaN	1	2.41262	590.332	86.6253	1424.25	266.759
816	951	Nkx3.1CE2/+; Ptenf/f intact-veh	ASAH1	Mus musculus N-acylsphingosine amidohydrolase 1 (Asah1), mRNA.	6.95607	0.000251698	0.00159903	NaN	0.931031	2.41238	3635.85	771.305	8771.03	1442.25
817	952	Nkx3.1CE2/+; Ptenf/f intact-veh	ZFP185	Mus musculus zinc finger protein 185 (Zfp185), mRNA.	6.95373	0.000940425	0.00338718	NaN	1	2.95315	384.958	4.64898	1136.84	264.772
818	953	Nkx3.1CE2/+; Ptenf/f intact-veh	TRIM34	Mus musculus tripartite motif protein 34 (Trim34), mRNA.	6.95006	0.000770932	0.00297359	NaN	1	5.45986	206.721	36.819	1128.67	320.733
819	954	Nkx3.1CE2/+; Ptenf/f intact-veh	ADCY8	Mus musculus adenylate cyclase 8 (Adcy8), mRNA.	6.94904	0.000802475	0.00306182	NaN	1	3.01447	139.715	10.0982	421.167	98.1767
820	955	Nkx3.1CE2/+; Ptenf/f intact-veh	VAMP5	Mus musculus vesicle-associated membrane protein 5 (Vamp5), transcript variant 2, mRNA.	6.94661	0.000412213	0.00200365	NaN	1	2.3225	200.893	22.1342	466.574	88.2991
821	956	Nkx3.1CE2/+; Ptenf/f intact-veh	FUT4	Mus musculus fucosyltransferase 4 (Fut4), mRNA.	6.93794	0.000808187	0.00306928	NaN	1	6.43626	189.135	37.0091	1217.32	359.216
822	957	Nkx3.1CE2/+; Ptenf/f intact-veh	PRDX4	NULL	6.93509	0.000602828	0.00254654	NaN	1	2.63005	1908.56	188.552	5019.62	1065.99
823	958	Nkx3.1CE2/+; Ptenf/f intact-veh	IRX3	NULL	6.93102	0.000277488	0.00168267	NaN	1	2.70817	238.048	43.9885	644.673	129.543
824	959	Nkx3.1CE2/+; Ptenf/f intact-veh	RNF141	NULL	6.92978	0.000266181	0.00165202	NaN	0.984602	2.60294	322.703	57.5654	839.977	163.719
825	960	Nkx3.1CE2/+; Ptenf/f intact-veh	CDON	NULL	6.92851	0.000311711	0.00174436	NaN	1	2.42521	176.395	25.3331	427.794	81.3385
826	961	Nkx3.1CE2/+; Ptenf/f intact-veh	ITFG3	Mus musculus integrin alpha FG-GAP repeat containing 3 (Itfg3), mRNA.	6.92723	0.000857053	0.00317024	NaN	1	3.39588	655.013	46.9954	2224.35	550.927
827	962	Nkx3.1CE2/+; Ptenf/f intact-veh	GCNT2	Mus musculus glucosaminyl (N-acetyl) transferase 2, I-branching enzyme (Gcnt2), transcript variant 1, mRNA.	6.92528	0.00037276	0.00189923	NaN	1	3.58828	769.89	180.045	2762.58	657.221
828	963	Nkx3.1CE2/+; Ptenf/f intact-veh	AGPAT2	Mus musculus 1-acylglycerol-3-phosphate O-acyltransferase 2 (lysophosphatidic acid acyltransferase, beta) (Agpat2), mRNA.	6.9223	0.000270334	0.00166107	NaN	0.999965	2.91032	288.288	60.9834	839.011	174.753
829	964	Nkx3.1CE2/+; Ptenf/f intact-veh	NOTCH1	Mus musculus Notch gene homolog 1 (Drosophila) (Notch1), mRNA.	6.92019	0.000581269	0.00249144	NaN	1	2.22799	586.453	46.0442	1306.61	246.452
830	965	Nkx3.1CE2/+; Ptenf/f intact-veh	LOC100043796	PREDICTED: Mus musculus similar to macrophage migration inhibitory factor, transcript variant 1 (LOC100043796), mRNA.	6.91838	0.000272025	0.00166593	NaN	1	2.27933	2094.17	411.457	4773.29	749.113
831	966	Nkx3.1CE2/+; Ptenf/f intact-veh	HIST1H2BE	Mus musculus histone cluster 1, H2be (Hist1h2be), mRNA.	6.91712	0.000329531	0.00178906	NaN	1	3.6412	2630.41	681.674	9577.85	2263.48
832	968	Nkx3.1CE2/+; Ptenf/f intact-veh	4933403G17RIK	NULL	6.91179	0.000919654	0.00334494	NaN	1	8.00108	121.363	17.6207	971.037	300.086
833	970	Nkx3.1CE2/+; Ptenf/f intact-veh	KCTD10	Mus musculus potassium channel tetramerisation domain containing 10 (Kctd10), mRNA.	6.90585	0.000548831	0.00239402	NaN	1	2.33171	1184.55	108.052	2762.02	538.256
834	971	Nkx3.1CE2/+; Ptenf/f intact-veh	2410025L10RIK	Mus musculus RIKEN cDNA 2410025L10 gene (2410025L10Rik), mRNA.	6.90533	0.000732837	0.00288686	NaN	1	3.98822	1264.59	180.178	5043.47	1316.02
835	972	Nkx3.1CE2/+; Ptenf/f intact-veh	ILDR1	Mus musculus immunoglobulin-like domain containing receptor 1 (Ildr1), mRNA.	6.89978	0.000831479	0.0031297	NaN	1	3.40486	655.962	56.726	2233.46	554.253
836	973	Nkx3.1CE2/+; Ptenf/f intact-veh	H2AFY	Mus musculus H2A histone family, member Y (H2afy), mRNA.	6.89938	0.000278506	0.00168267	NaN	1	2.19056	1565.57	205.718	3429.47	594.359
837	974	Nkx3.1CE2/+; Ptenf/f intact-veh	ACAP3	Mus musculus ArfGAP with coiled-coil, ankyrin repeat and PH domains 3 (Acap3), mRNA.	6.89811	0.000287823	0.00168993	NaN	1	2.19334	310.941	40.1186	681.999	118.92
838	975	Nkx3.1CE2/+; Ptenf/f intact-veh	HOXD13	Mus musculus homeo box D13 (Hoxd13), mRNA.	6.89597	0.000933633	0.00337831	NaN	1	2.62775	160.525	5.20728	421.819	92.5208
839	976	Nkx3.1CE2/+; Ptenf/f intact-veh	4933421E11RIK	Mus musculus RIKEN cDNA 4933421E11 gene (4933421E11Rik), transcript variant 2, mRNA.	6.89494	0.000851742	0.00316325	NaN	1	2.09042	334.808	68.2326	699.892	86.663
840	977	Nkx3.1CE2/+; Ptenf/f intact-veh	LOC100045967	PREDICTED: Mus musculus hypothetical protein LOC100045967 (LOC100045967), misc RNA.	6.88545	0.000928627	0.00336764	NaN	1	6.73368	993.137	126.946	6687.47	2017.78
841	979	Nkx3.1CE2/+; Ptenf/f intact-veh	SP100	Mus musculus nuclear antigen Sp100 (Sp100), mRNA.	6.87202	0.000961816	0.00341785	NaN	1	4.40095	191.961	11.1537	844.811	232.169
842	980	Nkx3.1CE2/+; Ptenf/f intact-veh	POLK	Mus musculus polymerase (DNA directed), kappa (Polk), mRNA.	6.87139	0.000240233	0.00157108	NaN	0.888623	2.40602	372.919	73.4723	897.251	155.37
843	982	Nkx3.1CE2/+; Ptenf/f intact-veh	S100A6	Mus musculus S100 calcium binding protein A6 (calcyclin) (S100a6), mRNA.	6.86768	0.000238719	0.00157108	NaN	0.88302	2.4056	3402	632.903	8183.87	1451.81
844	983	Nkx3.1CE2/+; Ptenf/f intact-veh	IBRDC3	NULL	6.86406	0.000404994	0.0019842	NaN	1	2.37173	366.018	44.7915	868.095	167.599
845	984	Nkx3.1CE2/+; Ptenf/f intact-veh	SSBP4	NULL	6.85932	0.000482013	0.00220392	NaN	1	3.81173	700.195	155.912	2668.95	667.58
846	987	Nkx3.1CE2/+; Ptenf/f intact-veh	2610024B07RIK	NULL	6.85246	0.000521769	0.00233476	NaN	1	2.21489	278.803	25.3262	617.519	115.659
847	988	Nkx3.1CE2/+; Ptenf/f intact-veh	POLD3	Mus musculus polymerase (DNA-directed), delta 3, accessory subunit (Pold3), mRNA.	6.85245	0.000408396	0.00199295	NaN	1	2.60898	884.591	240.326	2307.88	378.597
848	989	Nkx3.1CE2/+; Ptenf/f intact-veh	GSTT3	Mus musculus glutathione S-transferase, theta 3 (Gstt3), mRNA.	6.84363	0.000844058	0.0031569	NaN	1	3.5908	2999.74	301.972	10771.5	2748.7
849	990	Nkx3.1CE2/+; Ptenf/f intact-veh	TRAK1	Mus musculus trafficking protein, kinesin binding 1 (Trak1), mRNA.	6.8415	0.000526936	0.00234271	NaN	1	2.26364	1197.86	113.23	2711.52	517.745
850	991	Nkx3.1CE2/+; Ptenf/f intact-veh	E130014J05RIK	NULL	6.83078	0.000940308	0.00338718	NaN	1	2.66477	342.552	15.1389	912.824	203.373
851	993	Nkx3.1CE2/+; Ptenf/f intact-veh	SLC44A4	Mus musculus solute carrier family 44, member 4 (Slc44a4), mRNA.	6.82856	0.000450291	0.00210703	NaN	1	2.26922	1740.74	187.994	3950.13	746.61
852	994	Nkx3.1CE2/+; Ptenf/f intact-veh	STAT2	Mus musculus signal transducer and activator of transcription 2 (Stat2), mRNA.	6.82591	0.000414396	0.00200898	NaN	1	3.18713	564.054	111.268	1797.71	413.79
854	997	Nkx3.1CE2/+; Ptenf/f intact-veh	EPB4.1L4A	NULL	6.80968	0.000252884	0.00159903	NaN	0.935418	3.45955	683.364	220.977	2364.13	517.552
855	998	Nkx3.1CE2/+; Ptenf/f intact-veh	LYNX1	Mus musculus Ly6/neurotoxin 1 (Lynx1), mRNA.	6.80538	0.000788671	0.00301997	NaN	1	4.42608	237.158	39.1552	1049.68	287.165
856	1000	Nkx3.1CE2/+; Ptenf/f intact-veh	LOC329750	NULL	6.79654	0.000443199	0.002091	NaN	1	2.40404	2160.99	266.977	5195.11	1026.25
857	1001	Nkx3.1CE2/+; Ptenf/f intact-veh	AMPD3	Mus musculus adenosine monophosphate deaminase 3 (Ampd3), mRNA.	6.79593	0.000950814	0.00341131	NaN	1	6.35992	227.293	34.8396	1445.56	436.335
858	1002	Nkx3.1CE2/+; Ptenf/f intact-veh	CSF1	Mus musculus colony stimulating factor 1 (macrophage) (Csf1), mRNA.	6.79483	0.000960605	0.00341785	NaN	1	3.92795	153.85	12.2502	604.317	161.463
859	1004	Nkx3.1CE2/+; Ptenf/f intact-veh	SLFN2	Mus musculus schlafen 2 (Slfn2), mRNA.	6.79259	0.000984378	0.00346782	NaN	1	5.82917	156.568	17.7415	912.661	271.499
860	1005	Nkx3.1CE2/+; Ptenf/f intact-veh	TRP63	NULL	6.78855	0.00075526	0.00294233	NaN	1	2.61929	624.162	53.5675	1634.86	356.732
861	1006	Nkx3.1CE2/+; Ptenf/f intact-veh	IGF2BP2	Mus musculus insulin-like groNkx3.1CE2/+h factor 2 mRNA binding protein 2 (Igf2bp2), mRNA.	6.78175	0.000782292	0.00300488	NaN	1	3.50558	171.683	21.7383	601.849	152.299
862	1007	Nkx3.1CE2/+; Ptenf/f intact-veh	LOC100044948	PREDICTED: Mus musculus similar to macrophage migration inhibitory factor (LOC100044948), mRNA.	6.78085	0.000769083	0.00296956	NaN	1	3.18374	1726.53	196.162	5496.83	1333.42
863	1008	Nkx3.1CE2/+; Ptenf/f intact-veh	GOLGA7	Mus musculus golgi autoantigen, golgin subfamily a, 7 (Golga7), transcript variant 2, mRNA.	6.77706	0.000294097	0.00169979	NaN	1	2.57895	435.878	106.028	1124.11	198.479
865	1010	Nkx3.1CE2/+; Ptenf/f intact-veh	LOC100046817	PREDICTED: Mus musculus hypothetical protein LOC100046817 (LOC100046817), mRNA.	6.77458	0.000848916	0.0031591	NaN	1	3.41187	182.462	19.1978	622.537	156.785
866	1011	Nkx3.1CE2/+; Ptenf/f intact-veh	JUN	Mus musculus Jun oncogene (Jun), mRNA.	6.77347	0.000746864	0.00291727	NaN	1	4.02763	448.705	74.589	1807.22	479.82
867	1012	Nkx3.1CE2/+; Ptenf/f intact-veh	LOC100047628	PREDICTED: Mus musculus similar to Chain L, Structural Basis Of Antigen Mimicry In A Clinically Relevant Melanoma Antigen System, transcript variant 3 (LOC100047628), mRNA.	6.77173	0.000702218	0.00279301	NaN	1	3.59483	5037.2	2403.51	18107.9	3286.34
868	1014	Nkx3.1CE2/+; Ptenf/f intact-veh	LOC380706	NULL	6.76004	0.000943885	0.00339303	NaN	1	11.4007	298.832	102.952	3406.9	1116.75
870	1016	Nkx3.1CE2/+; Ptenf/f intact-veh	LRBA	Mus musculus LPS-responsive beige-like anchor (Lrba), transcript variant 1, mRNA.	6.75418	0.000319659	0.00176488	NaN	1	2.66743	1107.9	206.743	2955.24	602.797
871	1017	Nkx3.1CE2/+; Ptenf/f intact-veh	6430527G18RIK	Mus musculus RIKEN cDNA 6430527G18 gene (6430527G18Rik), mRNA.	6.7526	0.00031674	0.00175755	NaN	1	2.31533	2000.76	296.7	4632.42	857.469
872	1018	Nkx3.1CE2/+; Ptenf/f intact-veh	A130010C12RIK	NULL	6.75028	0.000853367	0.0031661	NaN	1	3.77763	1074.49	134.166	4059.01	1066.25
873	1019	Nkx3.1CE2/+; Ptenf/f intact-veh	TNS4	Mus musculus tensin 4 (Tns4), mRNA.	6.74422	0.000551107	0.00239769	NaN	1	2.3904	485.414	52.5403	1160.33	233.597
875	1021	Nkx3.1CE2/+; Ptenf/f intact-veh	ARHGAP17	Mus musculus Rho GTPase activating protein 17 (Arhgap17), mRNA.	6.73401	0.000444312	0.002091	NaN	1	2.15324	1412.41	149.497	3041.26	553.486
878	1024	Nkx3.1CE2/+; Ptenf/f intact-veh	PIK3R1	Mus musculus phosphatidylinositol 3-kinase, regulatory subunit, polypeptide 1 (p85 alpha) (Pik3r1), transcript variant 2, mRNA.	6.73245	0.000269318	0.00166035	NaN	0.996207	2.66771	637.135	145.658	1699.69	327.142
880	1027	Nkx3.1CE2/+; Ptenf/f intact-veh	TNFAIP3	Mus musculus tumor necrosis factor, alpha-induced protein 3 (Tnfaip3), mRNA.	6.72497	0.0008505	0.00316181	NaN	1	4.10446	177.885	26.0432	730.122	197.745
881	1028	Nkx3.1CE2/+; Ptenf/f intact-veh	9130415E20RIK	NULL	6.71809	0.000895125	0.00328153	NaN	1	3.63103	1523.28	171.188	5531.08	1441.09
884	1031	Nkx3.1CE2/+; Ptenf/f intact-veh	RTN4	Mus musculus reticulon 4 (Rtn4), transcript variant 4, mRNA.	6.70266	0.000281321	0.00168993	NaN	1	2.68973	193.741	47.3532	521.111	99.1387
885	1032	Nkx3.1CE2/+; Ptenf/f intact-veh	IER3	Mus musculus immediate early response 3 (Ier3), mRNA.	6.70192	0.000855381	0.0031689	NaN	1	4.95271	974.758	186.228	4827.7	1383.37
887	1034	Nkx3.1CE2/+; Ptenf/f intact-veh	LOC100047268	PREDICTED: Mus musculus similar to Immediate early response 5-like (LOC100047268), mRNA.	6.69524	0.000953996	0.0034128	NaN	1	2.92526	174.574	12.6711	510.674	121.651
888	1035	Nkx3.1CE2/+; Ptenf/f intact-veh	TLR4	NULL	6.69426	0.00097183	0.00343343	NaN	1	3.08445	255.922	18.9811	789.38	193.343
889	1036	Nkx3.1CE2/+; Ptenf/f intact-veh	HIST1H4I	Mus musculus histone cluster 1, H4i (Hist1h4i), mRNA.	6.69358	0.000957077	0.00341721	NaN	1	2.5654	492.12	28.8666	1262.48	278.94
891	1038	Nkx3.1CE2/+; Ptenf/f intact-veh	CHAD	Mus musculus chondroadherin (Chad), mRNA.	6.68886	0.000966275	0.00342361	NaN	1	5.30289	237.536	37.5762	1259.63	370.502
892	1039	Nkx3.1CE2/+; Ptenf/f intact-veh	LTBP1	NULL	6.68001	0.000618026	0.00258606	NaN	1	3.0898	194.575	30.2644	601.199	142.83
893	1040	Nkx3.1CE2/+; Ptenf/f intact-veh	C030013C21RIK	NULL	6.67958	0.000839066	0.00314459	NaN	1	3.01402	411.387	42.8194	1239.93	297.741
894	1041	Nkx3.1CE2/+; Ptenf/f intact-veh	CYP51	Mus musculus cytochrome P450, family 51 (Cyp51), mRNA.	6.67264	0.00031692	0.00175755	NaN	1	2.39745	298.625	50.1226	715.94	135.808
896	1043	Nkx3.1CE2/+; Ptenf/f intact-veh	HOMER2	NULL	6.66625	0.00057349	0.00246667	NaN	1	5.65568	238.632	89.0701	1349.62	388.311
899	1046	Nkx3.1CE2/+; Ptenf/f intact-veh	SOCS6	Mus musculus suppressor of cytokine signaling 6 (Socs6), mRNA.	6.66111	0.000906434	0.00331314	NaN	1	2.70577	244.526	19.1573	661.63	150.97
900	1047	Nkx3.1CE2/+; Ptenf/f intact-veh	ALAS1	Mus musculus aminolevulinic acid synthase 1 (Alas1), mRNA.	6.65997	0.000959085	0.00341785	NaN	1	4.42956	2045.88	281.709	9062.36	2549.67
903	1050	Nkx3.1CE2/+; Ptenf/f intact-veh	IRAK4	Mus musculus interleukin-1 receptor-associated kinase 4 (Irak4), mRNA.	6.65422	0.000357185	0.00185104	NaN	1	2.34564	203.892	30.6935	478.257	91.193
904	1051	Nkx3.1CE2/+; Ptenf/f intact-veh	DNASE2A	Mus musculus deoxyribonuclease II alpha (Dnase2a), mRNA.	6.64741	0.000469248	0.0021724	NaN	1	2.24546	573.473	67.1917	1287.71	245.435
905	1052	Nkx3.1CE2/+; Ptenf/f intact-veh	FBXO32	Mus musculus F-box protein 32 (Fbxo32), mRNA.	6.63836	0.000582534	0.0024934	NaN	1	2.95339	283.621	44.8435	837.645	194.344
906	1053	Nkx3.1CE2/+; Ptenf/f intact-veh	STX1A	Mus musculus syntaxin 1A (brain) (Stx1a), mRNA.	6.63649	0.000529012	0.00234622	NaN	1	2.74738	183.528	27.9722	504.221	111.56
908	1055	Nkx3.1CE2/+; Ptenf/f intact-veh	KCTD1	Mus musculus potassium channel tetramerisation domain containing 1 (Kctd1), mRNA. XM_978900 XM_980194	6.63377	0.000296942	0.00171356	NaN	1	2.41366	1070.25	204.409	2583.22	478.049
909	1058	Nkx3.1CE2/+; Ptenf/f intact-veh	STARD3	Mus musculus START domain containing 3 (Stard3), mRNA.	6.62339	0.000903651	0.00330951	NaN	1	3.34503	953.342	109.82	3188.96	812.068
910	1059	Nkx3.1CE2/+; Ptenf/f intact-veh	HOXA7	Mus musculus homeo box A7 (Hoxa7), mRNA.	6.62272	0.000314462	0.00175444	NaN	1	2.70004	421.361	108.655	1137.69	215.83
911	1060	Nkx3.1CE2/+; Ptenf/f intact-veh	LAMB2	Mus musculus laminin, beta 2 (Lamb2), mRNA.	6.62126	0.000955948	0.00341647	NaN	1	2.34104	965.309	56.6211	2259.82	472.155
913	1063	Nkx3.1CE2/+; Ptenf/f intact-veh	THOC6	Mus musculus THO complex 6 homolog (Drosophila) (Thoc6), mRNA.	6.60235	0.000529477	0.00234622	NaN	1	2.14891	380.474	39.0863	817.605	152.466
914	1064	Nkx3.1CE2/+; Ptenf/f intact-veh	TLE3	Mus musculus transducin-like enhancer of split 3, homolog of Drosophila E(spl) (Tle3), transcript variant 3, mRNA.	6.59259	0.000374351	0.00190026	NaN	1	2.26421	237.88	49.0072	538.609	87.645
915	1065	Nkx3.1CE2/+; Ptenf/f intact-veh	JAKMIP1	Mus musculus janus kinase and microtubule interacting protein 1 (Jakmip1), mRNA.	6.58954	0.000755668	0.00294233	NaN	1	2.63274	153.661	16.6191	404.549	90.251
917	1067	Nkx3.1CE2/+; Ptenf/f intact-veh	LZTS2	Mus musculus leucine zipper, putative tumor suppressor 2 (Lzts2), mRNA.	6.58886	0.000971541	0.00343343	NaN	1	2.87151	910.223	76.1751	2613.72	624.064
918	1068	Nkx3.1CE2/+; Ptenf/f intact-veh	ZNRF2	Mus musculus zinc and ring finger 2 (Znrf2), mRNA.	6.58718	0.000312719	0.00174735	NaN	1	2.27289	799.868	149.717	1818.01	313.866
919	1069	Nkx3.1CE2/+; Ptenf/f intact-veh	GRIP1	NULL	6.58568	0.000907651	0.00331432	NaN	1	3.28031	143.543	16.8789	470.865	119.382
920	1070	Nkx3.1CE2/+; Ptenf/f intact-veh	ADPGK	NULL	6.58183	0.000502252	0.00226841	NaN	1	2.69063	165.065	26.2845	444.129	96.9759
921	1072	Nkx3.1CE2/+; Ptenf/f intact-veh	HOXD12	NULL	6.57429	0.000608629	0.00256123	NaN	1	2.34553	158.448	17.5348	371.644	75.4641
922	1073	Nkx3.1CE2/+; Ptenf/f intact-veh	SLCO3A1	NULL	6.56632	0.000339431	0.00180093	NaN	1	2.16529	195.745	28.5018	423.845	74.9373
923	1074	Nkx3.1CE2/+; Ptenf/f intact-veh	LOC269859	PREDICTED: Mus musculus similar to protein tyrosine phosphatase 4a1 (LOC269859), mRNA.	6.56615	0.000447368	0.00210002	NaN	1	2.64464	222.177	37.5995	587.577	125.513
924	1075	Nkx3.1CE2/+; Ptenf/f intact-veh	GADD45B	Mus musculus groNkx3.1CE2/+h arrest and DNA-damage-inducible 45 beta (Gadd45b), mRNA.	6.56588	0.000882852	0.00324942	NaN	1	3.73545	183.096	27.7942	683.948	182.668
927	1078	Nkx3.1CE2/+; Ptenf/f intact-veh	TEC	Mus musculus cytoplasmic tyrosine kinase, Dscr28C related (Drosophila) (Tec), mRNA.	6.54975	0.000329053	0.00178906	NaN	1	2.50281	327.434	64.6578	819.504	159.7
929	1080	Nkx3.1CE2/+; Ptenf/f intact-veh	IL7	Mus musculus interleukin 7 (Il7), mRNA.	6.52658	0.000444938	0.00209127	NaN	1	2.33321	215.643	30.5545	503.141	98.8707
930	1081	Nkx3.1CE2/+; Ptenf/f intact-veh	CISH	Mus musculus cytokine inducible SH2-containing protein (Cish), mRNA.	6.52518	0.000355407	0.00184902	NaN	1	3.71081	574.107	194.3	2130.4	515.564
931	1084	Nkx3.1CE2/+; Ptenf/f intact-veh	TMC7	Mus musculus transmembrane channel-like gene family 7 (Tmc7), mRNA.	6.51984	0.000739536	0.00289782	NaN	1	7.06278	231.387	101.733	1634.24	507.031
932	1085	Nkx3.1CE2/+; Ptenf/f intact-veh	SMARCB1	Mus musculus SWI/SNF related, matrix associated, actin dependent regulator of chromatin, subfamily b, member 1 (Smarcb1), mRNA.	6.51923	0.000469127	0.0021724	NaN	1	2.30125	521.259	69.989	1199.55	234.85
933	1086	Nkx3.1CE2/+; Ptenf/f intact-veh	DUSP16	Mus musculus dual specificity phosphatase 16 (Dusp16), transcript variant A1, mRNA.	6.51566	0.000330155	0.00178906	NaN	1	2.88022	1395.42	380.223	4019.1	826.884
934	1087	Nkx3.1CE2/+; Ptenf/f intact-veh	B230380D07RIK	Mus musculus RIKEN cDNA B230380D07 gene (B230380D07Rik), mRNA.	6.51488	0.000464878	0.002163	NaN	1	2.16709	269.005	32.6942	582.958	108.609
936	1089	Nkx3.1CE2/+; Ptenf/f intact-veh	PAWR	Mus musculus PRKC, apoptosis, Nkx3.1CE2/+1, regulator (Pawr), mRNA.	6.50619	0.000466526	0.00216794	NaN	1	2.21318	809.838	168.933	1792.31	282.384
938	1091	Nkx3.1CE2/+; Ptenf/f intact-veh	SLC6A9	Mus musculus solute carrier family 6 (neurotransmitter transporter, glycine), member 9 (Slc6a9), mRNA.	6.49796	0.00035146	0.00183883	NaN	1	2.78273	881.92	204.04	2454.14	517.681
940	1093	Nkx3.1CE2/+; Ptenf/f intact-veh	UMPS	Mus musculus uridine monophosphate synthetase (Umps), mRNA.	6.4955	0.000629258	0.00261531	NaN	1	2.27121	162.801	17.6578	369.755	73.9407
943	1098	Nkx3.1CE2/+; Ptenf/f intact-veh	M6PR	NULL	6.47705	0.000350347	0.0018356	NaN	1	2.10481	4377.91	732.986	9214.69	1507.09
944	1099	Nkx3.1CE2/+; Ptenf/f intact-veh	EG632248	PREDICTED: Mus musculus predicted gene, EG632248 (EG632248), mRNA.	6.47522	0.000379784	0.00192128	NaN	1	2.48221	1014.75	186.04	2518.81	504.484
946	1101	Nkx3.1CE2/+; Ptenf/f intact-veh	HIST1H2BM	Mus musculus histone cluster 1, H2bm (Hist1h2bm), mRNA.	6.4688	0.000714543	0.0028329	NaN	1	3.56498	916.732	184.457	3268.14	851.318
949	1104	Nkx3.1CE2/+; Ptenf/f intact-veh	LOC673501	PREDICTED: Mus musculus hypothetical protein LOC673501 (LOC673501), mRNA.	6.46512	0.000581004	0.00249144	NaN	1	2.764	443.113	72.513	1224.77	277.829
950	1105	Nkx3.1CE2/+; Ptenf/f intact-veh	TRADD	NULL	6.46419	0.000734399	0.00288687	NaN	1	2.28457	248.666	24.5406	568.095	115.96
951	1106	Nkx3.1CE2/+; Ptenf/f intact-veh	CLIC3	Mus musculus chloride intracellular channel 3 (Clic3), mRNA.	6.4598	0.000682322	0.00274694	NaN	1	2.85707	123.143	18.8149	351.829	82.5321
953	1108	Nkx3.1CE2/+; Ptenf/f intact-veh	IQGAP1	NULL	6.45696	0.000431822	0.00205816	NaN	1	2.82401	1173.87	244.632	3315.03	734.903
954	1109	Nkx3.1CE2/+; Ptenf/f intact-veh	RFX2	Mus musculus regulatory factor X, 2 (influences HLA class II expression) (Rfx2), mRNA.	6.4565	0.00048005	0.00220038	NaN	1	2.41019	249.948	37.5125	602.421	122.749
956	1111	Nkx3.1CE2/+; Ptenf/f intact-veh	9130416B15	NULL	6.45343	0.000842199	0.00315313	NaN	1	2.60449	118.794	12.851	309.399	70.0266
959	1114	Nkx3.1CE2/+; Ptenf/f intact-veh	EML3	Mus musculus echinoderm microtubule associated protein like 3 (Eml3), mRNA.	6.4409	0.000686016	0.00274879	NaN	1	2.49544	480.187	59.7549	1198.28	259.688
961	1116	Nkx3.1CE2/+; Ptenf/f intact-veh	LOC100046770	PREDICTED: Mus musculus similar to histone macroH2A1.2 (LOC100046770), mRNA.	6.43678	0.000435963	0.00207279	NaN	1	2.16672	1601.32	313.075	3469.61	556.281
962	1117	Nkx3.1CE2/+; Ptenf/f intact-veh	TFDP1	NULL	6.43547	0.000378974	0.00192031	NaN	1	2.18018	762.852	141.787	1663.15	277.885
963	1118	Nkx3.1CE2/+; Ptenf/f intact-veh	LOC100046025	PREDICTED: Mus musculus similar to mKIAA1230 protein, transcript variant 1 (LOC100046025), mRNA.	6.42956	0.000779746	0.00299821	NaN	1	2.15036	520.23	44.8336	1118.68	219
964	1119	Nkx3.1CE2/+; Ptenf/f intact-veh	RIPK1	Mus musculus receptor (TNFRSF)-interacting serine-threonine kinase 1 (Ripk1), mRNA.	6.42883	0.000396579	0.00196745	NaN	1	2.1188	651.041	117.371	1379.43	222.417
965	1120	Nkx3.1CE2/+; Ptenf/f intact-veh	9030619K07RIK	NULL	6.41927	0.000628002	0.00261302	NaN	1	2.32709	856.925	103.246	1994.14	408.641
970	1125	Nkx3.1CE2/+; Ptenf/f intact-veh	EZH2	Mus musculus enhancer of zeste homolog 2 (Drosophila) (Ezh2), mRNA.	6.37874	0.000427039	0.00204557	NaN	1	2.21481	167.611	33.4893	371.226	62.2142
973	1128	Nkx3.1CE2/+; Ptenf/f intact-veh	GPD2	Mus musculus glycerol phosphate dehydrogenase 2, mitochondrial (Gpd2), nuclear gene encoding mitochondrial protein, mRNA.	6.37198	0.000644813	0.00263846	NaN	1	3.35472	634.75	138.109	2129.41	540.356
974	1129	Nkx3.1CE2/+; Ptenf/f intact-veh	2610507B11RIK	NULL	6.36842	0.000959374	0.00341785	NaN	1	2.66689	1036.63	109.023	2764.58	646.492
981	1137	Nkx3.1CE2/+; Ptenf/f intact-veh	LOC227393	NULL	6.33677	0.000471225	0.00217611	NaN	1	2.0546	285.081	50.9385	585.726	91.1948
982	1138	Nkx3.1CE2/+; Ptenf/f intact-veh	NGFR	Mus musculus nerve groNkx3.1CE2/+h factor receptor (TNFR superfamily, member 16) (Ngfr), mRNA.	6.33564	0.000401684	0.00197584	NaN	1	2.34434	170.979	31.3056	400.833	77.0527
983	1140	Nkx3.1CE2/+; Ptenf/f intact-veh	HIST1H2BN	Mus musculus histone cluster 1, H2bn (Hist1h2bn), mRNA.	6.32978	0.00052221	0.00233476	NaN	1	3.40674	1124.49	299.609	3830.86	957.767
987	1145	Nkx3.1CE2/+; Ptenf/f intact-veh	TMEM119	Mus musculus transmembrane protein 119 (Tmem119), mRNA.	6.31131	0.00088946	0.00327049	NaN	1	2.82027	162.381	21.7338	457.958	110.523
990	1148	Nkx3.1CE2/+; Ptenf/f intact-veh	NBEA	NULL	6.30509	0.000734101	0.00288687	NaN	1	3.11518	170.467	31.8125	531.036	132.657
996	1155	Nkx3.1CE2/+; Ptenf/f intact-veh	INSIG2	Mus musculus insulin induced gene 2 (Insig2), mRNA.	6.28491	0.000722686	0.00285906	NaN	1	3.79291	686.146	174.12	2602.49	705.117
1000	1159	Nkx3.1CE2/+; Ptenf/f intact-veh	CAT	NULL	6.27782	0.000762641	0.00296052	NaN	1	2.70371	412.849	61.5601	1116.22	260.269
1002	1161	Nkx3.1CE2/+; Ptenf/f intact-veh	LOC100047839	PREDICTED: Mus musculus hypothetical protein LOC100047839 (LOC100047839), mRNA.	6.25937	0.000546264	0.00238563	NaN	1	2.23101	262.13	36.6002	584.814	115.181
1003	1162	Nkx3.1CE2/+; Ptenf/f intact-veh	WSB1	Mus musculus WD repeat and SOCS box-containing 1 (Wsb1), transcript variant 2, mRNA.	6.25765	0.000996397	0.00349353	NaN	1	2.40544	769.712	74.0303	1851.5	410.307
1004	1163	Nkx3.1CE2/+; Ptenf/f intact-veh	LONRF3	Mus musculus LON peptidase N-terminal domain and ring finger 3 (Lonrf3), mRNA.	6.25476	0.00045057	0.00210703	NaN	1	2.20573	258.167	41.1576	569.448	107.11
1006	1167	Nkx3.1CE2/+; Ptenf/f intact-veh	EG633692	PREDICTED: Mus musculus predicted gene, EG633692 (EG633692), mRNA.	6.23924	0.000551617	0.00239769	NaN	1	3.1003	1319.57	317.291	4091.08	991.243
1008	1169	Nkx3.1CE2/+; Ptenf/f intact-veh	D6WSU176E	NULL	6.23866	0.000501019	0.00226742	NaN	1	2.75667	1070.26	230.862	2950.35	662.056
1009	1171	Nkx3.1CE2/+; Ptenf/f intact-veh	OTTMUSG00000007855	Mus musculus predicted gene, OTTMUSG00000007855 (OTTMUSG00000007855), mRNA.	6.23655	0.0005417	0.00236849	NaN	1	2.54862	332.324	59.806	846.968	183.587
1013	1178	Nkx3.1CE2/+; Ptenf/f intact-veh	IPO5	Mus musculus importin 5 (Ipo5), mRNA.	6.21914	0.000666369	0.00270298	NaN	1	2.26452	568.407	73.211	1287.17	263.482
1014	1179	Nkx3.1CE2/+; Ptenf/f intact-veh	NSDHL	Mus musculus NAD(P) dependent steroid dehydrogenase-like (Nsdhl), mRNA.	6.21282	0.000444316	0.002091	NaN	1	2.1805	201.466	36.843	439.296	77.9587
1015	1180	Nkx3.1CE2/+; Ptenf/f intact-veh	MTAP	Mus musculus methylthioadenosine phosphorylase (Mtap), mRNA.	6.20428	0.000448649	0.00210336	NaN	1	2.85107	339.7	89.705	968.51	213.396
1016	1181	Nkx3.1CE2/+; Ptenf/f intact-veh	DDAH2	Mus musculus dimethylarginine dimethylaminohydrolase 2 (Ddah2), mRNA.	6.20091	0.000603074	0.00254654	NaN	1	2.25408	284.895	39.6255	642.177	129.531
1026	1193	Nkx3.1CE2/+; Ptenf/f intact-veh	PDGFA	NULL	6.17393	0.000644461	0.00263846	NaN	1	2.70037	1463.31	269.117	3951.49	910.862
1027	1194	Nkx3.1CE2/+; Ptenf/f intact-veh	LOC100044968	PREDICTED: Mus musculus similar to modulator recognition factor 2 (LOC100044968), mRNA.	6.16687	0.000525616	0.00234248	NaN	1	2.2658	715.216	114.206	1620.54	321.282
1029	1196	Nkx3.1CE2/+; Ptenf/f intact-veh	PTPN12	Mus musculus protein tyrosine phosphatase, non-receptor type 12 (Ptpn12), mRNA.	6.1637	0.00070718	0.00280973	NaN	1	2.35495	271.503	37.5286	639.378	136.222
1033	1200	Nkx3.1CE2/+; Ptenf/f intact-veh	TYMS	Mus musculus thymidylate synthase (Tyms), mRNA.	6.15169	0.000534492	0.00235929	NaN	1	2.53421	352.152	68.1984	892.429	192.297
1035	1202	Nkx3.1CE2/+; Ptenf/f intact-veh	IKBKB	NULL	6.1379	0.000667159	0.00270298	NaN	1	2.11096	549.278	112.022	1159.51	184.953
1040	1207	Nkx3.1CE2/+; Ptenf/f intact-veh	SSBP2	NULL	6.11003	0.000943858	0.00339303	NaN	1	2.50184	293.835	37.2768	735.128	168.876
1041	1208	Nkx3.1CE2/+; Ptenf/f intact-veh	PCGF5	Mus musculus polycomb group ring finger 5 (Pcgf5), mRNA.	6.10787	0.000880784	0.00324504	NaN	1	2.1622	657.16	148.581	1420.91	222.85
1048	1215	Nkx3.1CE2/+; Ptenf/f intact-veh	NCKIPSD	Mus musculus NCK interacting protein with SH3 domain (Nckipsd), mRNA.	6.08812	0.000537804	0.00236429	NaN	1	2.18296	238.862	37.7748	521.426	100.353
1049	1216	Nkx3.1CE2/+; Ptenf/f intact-veh	PER2	Mus musculus period homolog 2 (Drosophila) (Per2), mRNA.	6.088	0.000830214	0.0031297	NaN	1	4.23346	600.061	186.636	2540.34	734.691
1053	1221	Nkx3.1CE2/+; Ptenf/f intact-veh	2900006A08RIK	NULL	6.07327	0.000533373	0.00235716	NaN	1	2.26363	350.231	60.6662	792.795	156.525
1055	1223	Nkx3.1CE2/+; Ptenf/f intact-veh	RPS6KA4	Mus musculus ribosomal protein S6 kinase, polypeptide 4 (Rps6ka4), mRNA.	6.07075	0.000682229	0.00274694	NaN	1	2.33522	562.451	84.8489	1313.45	278.25
1061	1229	Nkx3.1CE2/+; Ptenf/f intact-veh	HIF1A	NULL	6.05413	0.000673514	0.00272574	NaN	1	3.01504	221.288	51.5592	667.193	165.021
1063	1231	Nkx3.1CE2/+; Ptenf/f intact-veh	PRPF38B	Mus musculus PRP38 pre-mRNA processing factor 38 (yeast) domain containing B (Prpf38b), mRNA.	6.05206	0.000831726	0.0031297	NaN	1	2.59568	273.559	43.2476	710.071	165.748
1070	1241	Nkx3.1CE2/+; Ptenf/f intact-veh	CHD7	Mus musculus chromodomain helicase DNA binding protein 7 (Chd7), mRNA.	6.03807	0.000765372	0.00296142	NaN	1	2.80573	358.605	69.1456	1006.15	243.813
1071	1242	Nkx3.1CE2/+; Ptenf/f intact-veh	AKIRIN1	Mus musculus akirin 1 (Akirin1), mRNA.	6.0352	0.000635314	0.00262974	NaN	1	2.37095	876.105	214.915	2077.2	381.137
1074	1245	Nkx3.1CE2/+; Ptenf/f intact-veh	FNBP1L	Mus musculus formin binding protein 1-like (Fnbp1l), mRNA.	6.03265	0.00070132	0.00279245	NaN	1	2.26359	2384.14	344.442	5396.7	1122.04
1075	1246	Nkx3.1CE2/+; Ptenf/f intact-veh	TOR3A	NULL	6.02969	0.000636256	0.00262974	NaN	1	2.21421	147.474	22.0487	326.538	65.7207
1080	1255	Nkx3.1CE2/+; Ptenf/f intact-veh	SUMO2	Mus musculus SMT3 suppressor of mif two 3 homolog 2 (yeast) (Sumo2), mRNA.	6.00364	0.000802911	0.00306182	NaN	1	2.03728	4262.42	842.467	8683.74	1354.46
1082	1257	Nkx3.1CE2/+; Ptenf/f intact-veh	ADH5	NULL	5.99282	0.000641385	0.00263317	NaN	1	2.20994	791.157	121.111	1748.41	351.786
1083	1259	Nkx3.1CE2/+; Ptenf/f intact-veh	PTPRS	Mus musculus protein tyrosine phosphatase, receptor type, S (Ptprs), mRNA.	5.98785	0.000912238	0.0033245	NaN	1	2.81969	939.114	166.375	2648.01	658.282
1086	1262	Nkx3.1CE2/+; Ptenf/f intact-veh	STIM2	Mus musculus stromal interaction molecule 2 (Stim2), mRNA.	5.98033	0.000848026	0.0031591	NaN	1	2.0536	173.807	19.0122	356.929	70.0204
1087	1264	Nkx3.1CE2/+; Ptenf/f intact-veh	PGAM1	Mus musculus phosphoglycerate mutase 1 (Pgam1), mRNA.	5.97402	0.000573063	0.00246667	NaN	1	2.29426	882.041	188.845	2023.63	384.412
1092	1269	Nkx3.1CE2/+; Ptenf/f intact-veh	TMEM9	Mus musculus transmembrane protein 9 (Tmem9), mRNA.	5.95321	0.000568602	0.00245421	NaN	1	1.9671	1526.53	231.946	3002.83	511.255
1097	1274	Nkx3.1CE2/+; Ptenf/f intact-veh	ANP32A	Mus musculus acidic (leucine-rich) nuclear phosphoprotein 32 family, member A (Anp32a), mRNA.	5.93519	0.000665644	0.00270298	NaN	1	2.21465	1265.6	199.334	2802.85	568.364
1099	1276	Nkx3.1CE2/+; Ptenf/f intact-veh	CCRN4L	Mus musculus CCR4 carbon catabolite repression 4-like (S. cerevisiae) (Ccrn4l), mRNA.	5.92944	0.000804508	0.00306475	NaN	1	3.62696	240.277	71.2457	871.474	240.499
1102	1280	Nkx3.1CE2/+; Ptenf/f intact-veh	PPCS	Mus musculus phosphopantothenoylcysteine synthetase (Ppcs), mRNA.	5.9094	0.000593862	0.00252494	NaN	1	2.56245	828.823	202.22	2123.82	454.259
1104	1282	Nkx3.1CE2/+; Ptenf/f intact-veh	TPM3	Mus musculus tropomyosin 3, gamma (Tpm3), mRNA.	5.89918	0.000832556	0.0031297	NaN	1	2.97554	2066.79	780.096	6149.8	1287.32
1109	1287	Nkx3.1CE2/+; Ptenf/f intact-veh	TMCO6	Mus musculus transmembrane and coiled-coil domains 6 (Tmco6), mRNA.	5.88625	0.000617319	0.00258603	NaN	1	2.437	266.429	57.0626	649.287	137.372
1114	1293	Nkx3.1CE2/+; Ptenf/f intact-veh	GAS2L1	Mus musculus groNkx3.1CE2/+h arrest-specific 2 like 1 (Gas2l1), transcript variant alpha, mRNA.	5.87085	0.000640894	0.00263317	NaN	1	2.36139	375.287	73.8748	886.197	185.809
1116	1295	Nkx3.1CE2/+; Ptenf/f intact-veh	EP300	Mus musculus E1A binding protein p300 (Ep300), mRNA.	5.85725	0.000838721	0.00314459	NaN	1	2.24297	717.645	103.954	1609.66	342.848
1118	1297	Nkx3.1CE2/+; Ptenf/f intact-veh	RET	Mus musculus ret proto-oncogene (Ret), transcript variant 2, mRNA.	5.85654	0.000627591	0.00261302	NaN	1	2.43492	160.966	37.1548	391.938	81.0639
1122	1303	Nkx3.1CE2/+; Ptenf/f intact-veh	DEGS1	Mus musculus degenerative spermatocyte homolog 1 (Drosophila) (Degs1), mRNA.	5.85078	0.000665617	0.00270298	NaN	1	3.36372	2893.48	1182.47	9732.86	2324.32
1124	1305	Nkx3.1CE2/+; Ptenf/f intact-veh	LYRM2	Mus musculus LYR motif containing 2 (Lyrm2), mRNA.	5.84467	0.000818182	0.00310088	NaN	1	1.99724	519.078	97.895	1036.72	167.027
1125	1306	Nkx3.1CE2/+; Ptenf/f intact-veh	ZC3H12A	Mus musculus zinc finger CCCH type containing 12A (Zc3h12a), mRNA.	5.84294	0.000846479	0.0031591	NaN	1	2.12857	230.252	30.4582	490.109	100.06
1128	1310	Nkx3.1CE2/+; Ptenf/f intact-veh	ZHX2	Mus musculus zinc fingers and homeoboxes 2 (Zhx2), mRNA.	5.82767	0.000765092	0.00296142	NaN	1	2.18953	355.635	77.9741	778.674	139.489
1129	1311	Nkx3.1CE2/+; Ptenf/f intact-veh	POLS	Mus musculus polymerase (DNA directed) sigma (Pols), mRNA.	5.82565	0.00082855	0.0031297	NaN	1	2.58032	449.397	85.9269	1159.59	272.768
1131	1313	Nkx3.1CE2/+; Ptenf/f intact-veh	PPARGC1B	Mus musculus peroxisome proliferative activated receptor, gamma, coactivator 1 beta (Ppargc1b), mRNA.	5.81903	0.00067949	0.00274692	NaN	1	2.40202	281.984	68.1066	677.33	135.713
1135	1318	Nkx3.1CE2/+; Ptenf/f intact-veh	CRAT	Mus musculus carnitine acetyltransferase (Crat), nuclear gene encoding mitochondrial protein, mRNA.	5.80234	0.000963724	0.00341785	NaN	1	2.18521	251.515	32.8034	549.615	116.981
1137	1320	Nkx3.1CE2/+; Ptenf/f intact-veh	EI24	NULL	5.79196	0.000925676	0.00336023	NaN	1	2.15314	792.999	104.796	1707.43	357.201
1142	1326	Nkx3.1CE2/+; Ptenf/f intact-veh	C130092E12	NULL	5.77058	0.00081303	0.00308451	NaN	1	2.53152	554.651	109.789	1404.11	325.436
1147	1334	Nkx3.1CE2/+; Ptenf/f intact-veh	SLCO2A1	Mus musculus solute carrier organic anion transporter family, member 2a1 (Slco2a1), mRNA.	5.76007	0.000988038	0.0034741	NaN	1	3.24578	303.853	76.5249	986.241	269.252
1172	1369	Nkx3.1CE2/+; Ptenf/f intact-veh	AP1S1	Mus musculus adaptor protein complex AP-1, sigma 1 (Ap1s1), mRNA.	5.63992	0.000963542	0.00341785	NaN	1	2.0353	396.405	52.5224	806.802	162.026
1173	1370	Nkx3.1CE2/+; Ptenf/f intact-veh	CD63	NULL	5.63596	0.00079364	0.00303586	NaN	1	2.02861	4370.87	706.918	8866.81	1678.9
1175	1372	Nkx3.1CE2/+; Ptenf/f intact-veh	LOC209372	NULL	5.63493	0.000788443	0.00301997	NaN	1	2.04192	238.682	41.6576	487.371	90.6413
1178	1378	Nkx3.1CE2/+; Ptenf/f intact-veh	HIST1H3D	NULL	5.61999	0.000821931	0.00311189	NaN	1	2.20912	490.698	104.473	1084.01	212.235
1184	1386	Nkx3.1CE2/+; Ptenf/f intact-veh	LOC630936	PREDICTED: Mus musculus similar to nuclease sensitive element binding protein 1 (LOC630936), misc RNA.	5.59411	0.000864545	0.00319476	NaN	1	2.02684	6068.14	925.838	12299.2	2393.68
1185	1387	Nkx3.1CE2/+; Ptenf/f intact-veh	MANBA	Mus musculus mannosidase, beta A, lysosomal (Manba), mRNA.	5.593	0.00098794	0.0034741	NaN	1	2.17481	1200.1	185.204	2609.99	559.167
1187	1389	Nkx3.1CE2/+; Ptenf/f intact-veh	6330534C20RIK	Mus musculus RIKEN cDNA 6330534C20 gene (6330534C20Rik), mRNA.	5.59002	0.000837519	0.00314459	NaN	1	2.3948	167.273	36.5278	400.585	88.2239
1190	1392	Nkx3.1CE2/+; Ptenf/f intact-veh	C230075M21RIK	NULL	5.57438	0.000953606	0.0034128	NaN	1	2.35057	560.612	143.892	1317.76	263.216
1191	1393	Nkx3.1CE2/+; Ptenf/f intact-veh	ISG20	Mus musculus interferon-stimulated protein (Isg20), mRNA.	5.57384	0.000909709	0.00331855	NaN	1	2.93953	432.289	121.04	1270.73	326.285
1202	1404	Nkx3.1CE2/+; Ptenf/f intact-veh	EDN2	Mus musculus endothelin 2 (Edn2), mRNA.	5.53945	0.000870996	0.00321538	NaN	1	2.10704	152.231	27.6669	320.756	63.4219
1207	1409	Nkx3.1CE2/+; Ptenf/f intact-veh	UBE2F	Mus musculus ubiquitin-conjugating enzyme E2F (putative) (Ube2f), mRNA.	5.52545	0.000906144	0.00331314	NaN	1	2.30748	1314.95	307.542	3034.22	625.89
1210	1412	Nkx3.1CE2/+; Ptenf/f intact-veh	AA409316	Mus musculus expressed sequence AA409316 (AA409316), mRNA.	5.5092	0.000976464	0.00344322	NaN	1	2.02505	719.865	107.337	1457.76	290.852
1213	1415	Nkx3.1CE2/+; Ptenf/f intact-veh	BZW2	Mus musculus basic leucine zipper and W2 domains 2 (Bzw2), mRNA.	5.50319	0.000992256	0.00348562	NaN	1	3.06334	1798.37	535.111	5509	1468.04
1217	1420	Nkx3.1CE2/+; Ptenf/f intact-veh	TOP1	Mus musculus topoisomerase (DNA) I (Top1), mRNA.	5.49208	0.000974992	0.00344131	NaN	1	2.14398	369.164	78.6196	791.479	152.037
1219	1422	Nkx3.1CE2/+; Ptenf/f intact-veh	HIST1H3E	Mus musculus histone cluster 1, H3e (Hist1h3e), mRNA.	5.48809	0.000934308	0.00337831	NaN	1	2.29849	543.101	125.576	1248.31	259.87
1225	1431	Nkx3.1CE2/+; Ptenf/f intact-veh	D930038J03RIK	NULL	5.46556	0.00095213	0.00341272	NaN	1	2.15147	1395.23	284.99	3001.81	596.643
1234	1443	Nkx3.1CE2/+; Ptenf/f intact-veh	ZMIZ1	Mus musculus zinc finger, MIZ-type containing 1 (Zmiz1), mRNA.	5.44145	0.00099449	0.00349015	NaN	1	2.5005	242.103	56.9415	605.379	142.329
3496	1424	Nkx3.1CE2/+-veh	CKB	Mus musculus creatine kinase, brain (Ckb), mRNA.	-5.48119	0.000963309	0.00341785	NaN	1	2.42409	7643.87	689.091	3153.29	1754.29
3535	1177	Nkx3.1CE2/+-veh	LOC100043986	PREDICTED: Mus musculus hypothetical protein LOC100043986 (LOC100043986), misc RNA.	-6.22336	0.000631947	0.00262354	NaN	1	2.0205	1763.23	162.139	872.669	265.115
3546	1094	Nkx3.1CE2/+-veh	5430433G21RIK	PREDICTED: Mus musculus RIKEN cDNA 5430433G21 gene (5430433G21Rik), mRNA.	-6.48706	0.000369787	0.00189284	NaN	1	1.95408	767.816	59.378	392.93	113.959
3551	1057	Nkx3.1CE2/+-veh	SERPINE2	NULL	-6.63115	0.000365477	0.00188025	NaN	1	3.93033	8883.27	1076.64	2260.18	1914.96
3555	1003	Nkx3.1CE2/+-veh	IMPDH1	Mus musculus inosine 5'-phosphate dehydrogenase 1 (Impdh1), mRNA.	-6.79348	0.000254889	0.00160554	NaN	0.942836	1.96877	877.294	59.4093	445.605	131.029
3557	995	Nkx3.1CE2/+-veh	LOC239559	NULL	-6.81009	0.000252131	0.00159903	NaN	0.932631	2.29235	598.284	44.6376	260.991	103.602
3566	935	Nkx3.1CE2/+-veh	THNSL2	Mus musculus threonine synthase-like 2 (bacterial) (Thnsl2), transcript variant 1, mRNA.	-7.02474	0.000235975	0.00156149	NaN	0.872871	1.9147	799.03	56.6585	417.313	106.283
3567	917	Nkx3.1CE2/+-veh	S3-12	Mus musculus plasma membrane associated protein, S3-12 (S3-12), mRNA.	-7.12485	0.000214123	0.00149734	NaN	0.792041	2.22733	711.951	43.949	319.643	119.699
3569	912	Nkx3.1CE2/+-veh	OAT	Mus musculus ornithine aminotransferase (Oat), mRNA.	-7.14276	0.000736168	0.00289075	NaN	1	1.99755	9521.47	859.91	4766.58	1086.28
3572	902	Nkx3.1CE2/+-veh	GDPD3	Mus musculus glycerophosphodiester phosphodiesterase domain containing 3 (Gdpd3), mRNA.	-7.16892	0.000219907	0.00151847	NaN	0.813436	5.50101	7044.21	614.597	1280.53	1767.16
3585	796	Nkx3.1CE2/+-veh	PCCB	Mus musculus propionyl Coenzyme A carboxylase, beta polypeptide (Pccb), nuclear gene encoding mitochondrial protein, mRNA.	-7.57156	0.000131471	0.00121553	NaN	0.48631	1.95343	3001.04	187.038	1536.3	393.165
3586	780	Nkx3.1CE2/+-veh	9530002B09RIK	Mus musculus RIKEN cDNA 9530002B09 gene (9530002B09Rik), mRNA.	-7.62517	0.000234237	0.00155555	NaN	0.866441	4.94024	14514.2	1769.64	2937.94	2750.56
3588	767	Nkx3.1CE2/+-veh	1190007F08RIK	Mus musculus RIKEN cDNA 1190007F08 gene (1190007F08Rik), mRNA. XM_921339 XM_921348 XM_921353	-7.66024	0.000165852	0.00133699	NaN	0.613487	1.85461	2790.72	119.832	1504.75	374.668
3590	755	Nkx3.1CE2/+-veh	GYLTL1B	Mus musculus glycosyltransferase-like 1B (Gyltl1b), mRNA.	-7.72331	0.0001244	0.00118778	NaN	0.460154	1.91663	3868.39	243.573	2018.32	475.004
3591	752	Nkx3.1CE2/+-veh	SLC7A4	Mus musculus solute carrier family 7 (cationic amino acid transporter, y+ system), member 4 (Slc7a4), mRNA.	-7.735	0.00015821	0.00132402	NaN	0.585218	1.93189	5603.85	247.963	2900.7	780.898
3610	584	Nkx3.1CE2/+-veh	MYL9	NULL	-8.64599	5.63754e-05	0.00081006	NaN	0.208533	4.91755	4391.35	357.468	892.995	852.493
3615	538	Nkx3.1CE2/+-veh	1300007L22RIK	NULL	-8.93161	8.54897e-05	0.000985129	NaN	0.316226	2.3598	1861.9	137.96	789.007	220.252
3617	524	Nkx3.1CE2/+-veh	TGM4	Mus musculus transglutaminase 4 (prostate) (Tgm4), mRNA.	-8.97819	0.000285956	0.00168993	NaN	1	8.06145	20000	0	2480.94	4779.67
3618	523	Nkx3.1CE2/+-veh	PDLIM3	Mus musculus PDZ and LIM domain 3 (Pdlim3), mRNA.	-8.98552	8.40308e-05	0.000976407	NaN	0.31083	4.67307	2885.4	290.641	617.453	461.834
3624	500	Nkx3.1CE2/+-veh	DM15	NULL	-9.11927	0.000182377	0.00138778	NaN	0.674611	3.00556	1991.19	184.607	662.503	243.339
3629	454	Nkx3.1CE2/+-veh	USO1	Mus musculus USO1 homolog, vesicle docking protein (yeast) (Uso1), mRNA.	-9.41104	0.000848746	0.0031591	NaN	1	2.50897	3057.67	281.956	1218.7	264.772
3631	441	Nkx3.1CE2/+-veh	HMGCS2	Mus musculus 3-hydroxy-3-methylglutaryl-Coenzyme A synthase 2 (Hmgcs2), nuclear gene encoding mitochondrial protein, mRNA.	-9.49826	0.000173737	0.00136735	NaN	0.642654	3.35974	1316.39	125.047	391.813	159.934
3632	432	Nkx3.1CE2/+-veh	ANXA6	Mus musculus annexin A6 (Anxa6), mRNA.	-9.55905	0.000328616	0.00178906	NaN	1	2.58951	4899.65	426.09	1892.11	480.455
3636	390	Nkx3.1CE2/+-veh	A4GALT	Mus musculus alpha 1,4-galactosyltransferase (A4galt), mRNA.	-9.94422	0.000109928	0.00113582	NaN	0.406624	4.09127	1581.27	151.391	386.498	201.925
3638	377	Nkx3.1CE2/+-veh	LMO7	PREDICTED: Mus musculus LIM domain only 7, transcript variant 11 (Lmo7), mRNA.	-10.052	0.000284713	0.00168993	NaN	1	2.76336	3526.46	304.891	1276.15	338.791
3639	368	Nkx3.1CE2/+-veh	A3GALT2	Mus musculus alpha 1,3-galactosyltransferase 2 (isoglobotriaosylceramide synthase) (A3galt2), mRNA.	-10.1252	0.000929969	0.0033692	NaN	1	3.09497	764.239	75.5031	246.929	65.2729
3641	345	Nkx3.1CE2/+-veh	AI428936	Mus musculus expressed sequence AI428936 (AI428936), mRNA.	-10.3492	0.000117762	0.00116748	NaN	0.435601	2.59698	5452.3	417.459	2099.47	530.276
3643	341	Nkx3.1CE2/+-veh	MYLK	Mus musculus myosin, light polypeptide kinase (Mylk), mRNA.	-10.3749	4.11848e-05	0.000702039	NaN	0.152343	5.357	14761.7	1354.54	2755.59	2089.36
3645	335	Nkx3.1CE2/+-veh	LARS	Mus musculus leucyl-tRNA synthetase (Lars), mRNA. XM_901187 XM_913429 XM_922755 XM_922767 XM_922771 XM_922775 XM_922782 XM_922785 XM_989215	-10.4434	5.12071e-05	0.00076998	NaN	0.189415	2.1461	9025.5	555.221	4205.54	813.345
3646	328	Nkx3.1CE2/+-veh	ARFGAP3	Mus musculus ADP-ribosylation factor GTPase activating protein 3 (Arfgap3), mRNA.	-10.5162	0.000305223	0.0017284	NaN	1	2.39132	3425.93	262.849	1432.65	278.175
3647	301	Nkx3.1CE2/+-veh	MAGIX	Mus musculus MAGI family member, X-linked (Magix), mRNA.	-10.8611	0.000286678	0.00168993	NaN	1	2.40386	398.439	29.8501	165.75	31.1751
3651	256	Nkx3.1CE2/+-veh	CAV1	Mus musculus caveolin 1, caveolae protein (Cav1), mRNA.	-11.4919	2.51478e-05	0.000592745	NaN	0.0930218	2.8977	3334.38	106.477	1150.7	440.419
3653	243	Nkx3.1CE2/+-veh	DES	Mus musculus desmin (Des), mRNA.	-11.6127	0.000625231	0.00260736	NaN	1	8.03159	5435.79	608.544	676.802	516.731
3658	210	Nkx3.1CE2/+-veh	TPM2	Mus musculus tropomyosin 2, beta (Tpm2), mRNA.	-12.1374	0.000120625	0.00118057	NaN	0.446192	4.99613	8741.84	783.171	1749.72	874.361
3659	207	Nkx3.1CE2/+-veh	3100002J23RIK	PREDICTED: Mus musculus RIKEN cDNA 3100002J23 gene, transcript variant 2 (3100002J23Rik), mRNA.	-12.1823	0.000940176	0.00338718	NaN	1	3.63039	739.919	67.5501	203.813	49.9371
3662	194	Nkx3.1CE2/+-veh	C920007D24RIK	NULL	-12.4252	0.000946671	0.00339974	NaN	1	2.95254	810.974	66.5136	274.67	48.2698
3663	193	Nkx3.1CE2/+-veh	MYH11	NULL	-12.4298	4.38765e-05	0.000724549	NaN	0.162299	8.60156	7171.7	653.881	833.768	839.558
3666	168	Nkx3.1CE2/+-veh	D11BWG0517E	Mus musculus DNA segment, Chr 11, Brigham & Women's Genetics 0517 expressed (D11Bwg0517e), transcript variant 1, mRNA.	-12.8036	7.62943e-05	0.000921888	NaN	0.282212	5.03732	1091.14	91.6306	216.61	105.828
3667	166	Nkx3.1CE2/+-veh	SRM	Mus musculus spermidine synthase (Srm), mRNA.	-12.817	0.000892702	0.00327915	NaN	1	3.32993	4128.42	348.014	1239.79	250.069
3668	161	Nkx3.1CE2/+-veh	FAM115C	Mus musculus family with sequence similarity 115, member C (Fam115c), mRNA.	-12.9862	5.26532e-06	0.00035181	NaN	0.0194764	6.18711	5279.67	259.175	853.334	750.154
3669	145	Nkx3.1CE2/+-veh	MCFD2	Mus musculus multiple coagulation factor deficiency 2 (Mcfd2), mRNA.	-13.3406	0.000257842	0.00161381	NaN	0.953759	2.89935	9936.63	708.667	3427.19	651.234
3670	142	Nkx3.1CE2/+-veh	EMCN	Mus musculus endomucin (Emcn), mRNA.	-13.434	3.27158e-05	0.000647143	NaN	0.121016	2.96653	2532.69	27.317	853.758	303.682
3671	135	Nkx3.1CE2/+-veh	HSPB6	Mus musculus heat shock protein, alpha-crystallin-related, B6 (Hspb6), mRNA.	-13.7624	0.000219201	0.0015184	NaN	0.810824	4.43153	5552.02	452.558	1252.85	419.393
3672	130	Nkx3.1CE2/+-veh	SARS	Mus musculus seryl-aminoacyl-tRNA synthetase (Sars), mRNA.	-13.8281	3.32467e-05	0.00065	NaN	0.12298	2.66692	2377.13	140.113	891.339	173.223
3679	104	Nkx3.1CE2/+-veh	2310057J16RIK	Mus musculus RIKEN cDNA 2310057J16 gene (2310057J16Rik), mRNA.	-14.8986	1.19091e-05	0.000433187	NaN	0.0440517	3.07331	1204.68	68.294	391.98	92.3312
3680	96	Nkx3.1CE2/+-veh	RTN2	Mus musculus reticulon 2 (Z-band associated protein) (Rtn2), transcript variant B, mRNA.	-15.3906	9.83986e-06	0.000414649	NaN	0.0363976	2.52672	469.159	23.0365	185.679	31.2123
3681	92	Nkx3.1CE2/+-veh	ACTG2	Mus musculus actin, gamma 2, smooth muscle, enteric (Actg2), mRNA.	-15.5727	3.41514e-06	0.000315658	NaN	0.0126326	7.82195	12576.2	818.406	1607.82	1279.44
3684	64	Nkx3.1CE2/+-veh	H47	Mus musculus histocompatibility 47 (H47), mRNA.	-17.5467	6.73825e-07	0.000181676	NaN	0.00249248	3.36164	12943.5	544.78	3850.37	1008.85
3685	63	Nkx3.1CE2/+-veh	9430081H08RIK	NULL	-17.6466	1.80145e-06	0.000259328	NaN	0.00666357	2.34586	598.216	11.3164	255.01	44.8714
3687	56	Nkx3.1CE2/+-veh	GCAT	NULL	-18.5609	0.000826644	0.00312654	NaN	1	4.65254	2462.83	169.113	529.35	88.9349
3688	51	Nkx3.1CE2/+-veh	IFT20	Mus musculus intraflagellar transport 20 homolog (Chlamydomonas) (Ift20), mRNA.	-19.2152	9.87072e-07	0.000222692	NaN	0.00365118	2.61999	19780.5	380.26	7549.82	1463.44
3689	49	Nkx3.1CE2/+-veh	GGA2	Mus musculus golgi associated, gamma adaptin ear containing, ARF binding protein 2 (Gga2), mRNA.	-19.3415	2.46206e-07	9.10717e-05	NaN	0.000910717	2.40931	3143.89	88.0839	1304.89	196.786
3690	48	Nkx3.1CE2/+-veh	LOC381860	NULL	-19.3429	6.81299e-06	0.000376138	NaN	0.0252012	7.86074	20000	0	2544.29	2210.5
3691	40	Nkx3.1CE2/+-veh	SPCS3	Mus musculus signal peptidase complex subunit 3 homolog (S. cerevisiae) (Spcs3), mRNA.	-21.616	7.60729e-05	0.000921888	NaN	0.281393	3.34469	4443.06	214.451	1328.39	180.537
3692	34	Nkx3.1CE2/+-veh	A230005G17RIK	NULL	-24.6144	4.92499e-06	0.00035181	NaN	0.0182175	4.16747	1071.68	44.9538	257.153	50.2848
3693	31	Nkx3.1CE2/+-veh	NXF7	Mus musculus nuclear RNA export factor 7 (Nxf7), mRNA.	-27.1506	0.000322451	0.00177135	NaN	1	4.09911	673.586	30.4922	164.325	15.8548
3694	27	Nkx3.1CE2/+-veh	MRPS6	Mus musculus mitochondrial ribosomal protein S6 (Mrps6), nuclear gene encoding mitochondrial protein, mRNA.	-29.2357	2.46021e-06	0.000284385	NaN	0.00910031	3.58338	7039.43	236.604	1964.47	262.363
3695	24	Nkx3.1CE2/+-veh	C1RL	Mus musculus complement component 1, r subcomponent-like (C1rl), mRNA.	-32.48	2.06148e-06	0.000262945	NaN	0.0076254	4.02453	715.898	22.8211	177.884	24.5903
3696	15	Nkx3.1CE2/+-veh	EG434396	Mus musculus predicted gene, EG434396 (EG434396), mRNA.	-66.0124	1.66361e-08	1.23074e-05	NaN	6.15369e-05	47.9633	19777.6	385.185	412.349	468.635
3697	6	Nkx3.1CE2/+-veh	FGL1	NULL	-155.049	2.1172e-10	1.95788e-07	NaN	7.83154e-07	30.6661	20000	0	652.186	305.66
3698	5	Nkx3.1CE2/+-veh	9530003J23RIK	Mus musculus RIKEN cDNA 9530003J23 gene (9530003J23Rik), mRNA.	-163.67	1.61539e-10	1.95788e-07	NaN	5.97534e-07	69.2373	20000	0	288.862	294.997
3699	4	Nkx3.1CE2/+-veh	NKX3-1	Mus musculus NK-3 transcription factor, locus 1 (Drosophila) (Nkx3-1), mRNA.	-194.25	6.86087e-11	1.26892e-07	NaN	2.53783e-07	61.5129	20000	0	325.135	248.1
