# Supplementary material for: Dual Targeting of the Akt/mTOR Signaling Pathway Inhibits Castration-Resistant Prostate Cancer in a Genetically Engineered Mouse Model
Source: Oxford University Press journal article supplement (doi:10.1158/0008-5472.can-12-0283), 2012-07-20
Supplement: 00085472can120283-sup-tab5.xlsx [file 00085472can120283-sup-tab5.xlsx]

## Sheet: p < 0.001
Supp. Table 5: Summary of differentially expressed genes for castrated Nkx3.1CE2/+;Ptenf/f mice versus Nkx3.1CE2/+ mice
Row	Rank	Upregulated in	Feature	Description	Score	Feature P	FDR(BH)	Q Value	Bonferroni	Fold Change	Nkx3.1CE2/+ -veh Mean	Nkx3.1CE2/+ -veh Std	Nkx3.1CE2/+; Ptenf/f intact -veh Mean	Nkx3.1CE2/+; Ptenf/f intact -veh Std
3174	2	Nkx3.1CE2/+ -veh	NKX3-1	Mus musculus NK-3 transcription factor, locus 1 (Drosophila) (Nkx3-1), mRNA.	728.188	9.25926e-14	2.93889e-10	NaN	2.93889e-10	102.471	20000	0	195.177	66.6198
3173	7	Nkx3.1CE2/+ -veh	9530003J23RIK	Mus musculus RIKEN cDNA 9530003J23 gene (9530003J23Rik), mRNA.	-728.188	2.92854e-10	3.7331e-07	NaN	9.29519e-07	70.9889	20000	0	281.734	332.398
3172	8	Nkx3.1CE2/+ -veh	FGL1	NULL	-145.307	3.75263e-10	3.7331e-07	NaN	1.19108e-06	28.1631	20000	0	710.148	341.711
14	20	Nkx3.1CE2/+; Ptenf/f castrated-veh	KRT15	Mus musculus keratin 15 (Krt15), mRNA.	43.0763	4.7046e-10	3.7331e-07	NaN	1.49324e-06	11.9628	1645.46	358.928	19684.3	773.361
15	21	Nkx3.1CE2/+; Ptenf/f castrated-veh	LUZP1	NULL	40.3779	1.25699e-09	7.97938e-07	NaN	3.98969e-06	3.44793	725.438	33.966	2501.26	88.8237
3170	13	Nkx3.1CE2/+ -veh	LOC381860	NULL	-87.8931	9.95493e-09	5.05946e-06	NaN	3.1597e-05	20.626	20000	0	969.649	649.606
3165	33	Nkx3.1CE2/+ -veh	IFT20	Mus musculus intraflagellar transport 20 homolog (Chlamydomonas) (Ift20), mRNA.	-30.8008	1.1659e-08	5.05946e-06	NaN	3.70055e-05	2.85352	19780.5	380.26	6931.95	893.992
23	32	Nkx3.1CE2/+; Ptenf/f castrated-veh	LOC100045967	PREDICTED: Mus musculus hypothetical protein LOC100045967 (LOC100045967), misc RNA.	30.0266	1.27523e-08	5.05946e-06	NaN	4.04757e-05	5.7962	993.137	126.946	5756.42	333.814
18	26	Nkx3.1CE2/+; Ptenf/f castrated-veh	BCL3	Mus musculus B-cell leukemia/lymphoma 3 (Bcl3), mRNA.	33.588	1.63229e-08	5.63537e-06	NaN	5.18087e-05	4.90044	145.853	9.42555	714.743	35.3242
3169	15	Nkx3.1CE2/+ -veh	TGM4	Mus musculus transglutaminase 4 (prostate) (Tgm4), mRNA.	-71.7584	1.77548e-08	5.63537e-06	NaN	5.63537e-05	30.8508	20000	0	648.281	741.695
3168	23	Nkx3.1CE2/+ -veh	9430081H08RIK	NULL	-63.9102	2.43268e-08	6.77048e-06	NaN	7.72132e-05	2.61924	598.216	11.3164	228.393	16.5308
34	46	Nkx3.1CE2/+; Ptenf/f castrated-veh	DAB2IP	NULL	26.7209	2.55973e-08	6.77048e-06	NaN	8.12457e-05	4.96544	567.414	79.5098	2817.46	171.368
36	50	Nkx3.1CE2/+; Ptenf/f castrated-veh	TMEM141	Mus musculus transmembrane protein 141 (Tmem141), mRNA. XM_979169	24.917	4.53674e-08	1.10766e-05	NaN	0.000143996	3.30175	419.43	33.7923	1384.85	81.9309
38	52	Nkx3.1CE2/+; Ptenf/f castrated-veh	2700084L06RIK	NULL	24.8019	5.09802e-08	1.15579e-05	NaN	0.000161811	2.84229	1463.47	108.885	4159.61	216.917
3163	41	Nkx3.1CE2/+ -veh	HERPUD1	Mus musculus homocysteine-inducible, endoplasmic reticulum stress-inducible, ubiquitin-like domain member 1 (Herpud1), mRNA.	-29.8731	5.90914e-08	1.25037e-05	NaN	0.000187556	3.07561	19694.2	529.638	6403.36	867.514
42	58	Nkx3.1CE2/+; Ptenf/f castrated-veh	BAIAP2L1	Mus musculus BAI1-associated protein 2-like 1 (Baiap2l1), mRNA.	23.2681	6.51156e-08	1.29173e-05	NaN	0.000206677	6.17399	174.213	36.7595	1075.59	78.0403
29	40	Nkx3.1CE2/+; Ptenf/f castrated-veh	KRBA1	Mus musculus KRAB-A domain containing 1 (Krba1), mRNA.	28.3582	8.09324e-08	1.51106e-05	NaN	0.000256879	5.51205	344.435	32.62	1898.54	124.111
31	43	Nkx3.1CE2/+; Ptenf/f castrated-veh	CD74	Mus musculus CD74 antigen (invariant polypeptide of major histocompatibility complex, class II antigen-associated) (Cd74), transcript variant 1, mRNA.	27.6381	8.8895e-08	1.56751e-05	NaN	0.000282153	8.46984	2274.9	362	19268	1377.75
49	66	Nkx3.1CE2/+; Ptenf/f castrated-veh	BLVRA	NULL	22.0607	1.00842e-07	1.68459e-05	NaN	0.000320072	3.00073	795.495	69.0708	2387.06	146.961
5	6	Nkx3.1CE2/+; Ptenf/f castrated-veh	MFGE8	NULL	118.006	1.16585e-07	1.70301e-05	NaN	0.00037004	4.77082	4184.11	123.605	19961.6	94.0155
53	70	Nkx3.1CE2/+; Ptenf/f castrated-veh	LOC624083	PREDICTED: Mus musculus similar to RIKEN cDNA 5830484A20 gene (LOC624083), misc RNA.	21.5174	1.17803e-07	1.70301e-05	NaN	0.000373908	3.82828	157.199	18.9986	601.803	42.8693
54	71	Nkx3.1CE2/+; Ptenf/f castrated-veh	PANX1	Mus musculus pannexin 1 (Panx1), mRNA.	21.4567	1.18041e-07	1.70301e-05	NaN	0.000374662	2.9002	209.827	17.1082	608.542	38.4026
20	28	Nkx3.1CE2/+; Ptenf/f castrated-veh	MOCOS	Mus musculus molybdenum cofactor sulfurase (Mocos), mRNA.	31.3921	1.24205e-07	1.71403e-05	NaN	0.000394227	3.17339	232.956	6.5701	739.26	36.5453
17	24	Nkx3.1CE2/+; Ptenf/f castrated-veh	LOC100045250	PREDICTED: Mus musculus hypothetical protein LOC100045250 (LOC100045250), misc RNA.	36.9082	1.59322e-07	2.03605e-05	NaN	0.000505687	66.0088	218.956	88.5344	14453	916.775
62	80	Nkx3.1CE2/+; Ptenf/f castrated-veh	TMCO4	Mus musculus transmembrane and coiled-coil domains 4 (Tmco4), mRNA.	20.5181	1.66072e-07	2.03605e-05	NaN	0.000527112	4.27252	298.831	41.8816	1276.76	100.103
26	37	Nkx3.1CE2/+; Ptenf/f castrated-veh	CLN3	Mus musculus ceroid lipofuscinosis, neuronal 3, juvenile (Batten, Spielmeyer-Vogt disease) (Cln3), mRNA.	28.8606	1.66784e-07	2.03605e-05	NaN	0.000529374	10.2835	220.048	33.9718	2262.87	164.447
3156	82	Nkx3.1CE2/+ -veh	MRPS6	Mus musculus mitochondrial ribosomal protein S6 (Mrps6), nuclear gene encoding mitochondrial protein, mRNA.	-21.2446	1.779e-07	2.09131e-05	NaN	0.000564654	3.60089	7039.43	236.604	1954.92	514.328
33	45	Nkx3.1CE2/+; Ptenf/f castrated-veh	MMP15	Mus musculus matrix metallopeptidase 15 (Mmp15), mRNA. XM_001002221	26.8898	2.4717e-07	2.80185e-05	NaN	0.000784518	4.66207	1527.73	102.713	7122.39	486.621
24	34	Nkx3.1CE2/+; Ptenf/f castrated-veh	VILL	Mus musculus villin-like (Vill), mRNA.	29.5888	2.57658e-07	2.82002e-05	NaN	0.000817807	9.28604	163.701	17.5446	1520.14	107.837
41	56	Nkx3.1CE2/+; Ptenf/f castrated-veh	2010308M01RIK	NULL	23.546	2.77799e-07	2.85816e-05	NaN	0.000881735	5.20473	155.346	15.8556	808.532	62.7038
71	90	Nkx3.1CE2/+; Ptenf/f castrated-veh	SALL3	Mus musculus sal-like 3 (Drosophila) (Sall3), mRNA.	19.3847	2.79152e-07	2.85816e-05	NaN	0.000886028	4.50357	442.841	66.6181	1994.36	171.477
35	48	Nkx3.1CE2/+; Ptenf/f castrated-veh	4933403G17RIK	NULL	24.932	2.89375e-07	2.87024e-05	NaN	0.000918477	9.0932	121.363	17.6207	1103.58	86.5223
19	27	Nkx3.1CE2/+; Ptenf/f castrated-veh	FER1L3	NULL	32.8892	3.2153e-07	3.09254e-05	NaN	0.00102054	30.0822	308.844	54.0261	9290.69	650.552
21	29	Nkx3.1CE2/+; Ptenf/f castrated-veh	AI987692	Mus musculus expressed sequence AI987692 (AI987692), mRNA.	30.9263	4.49487e-07	4.1961e-05	NaN	0.00142667	69.7107	257.331	115.804	17938.7	1369.9
51	68	Nkx3.1CE2/+; Ptenf/f castrated-veh	TMEM63A	Mus musculus transmembrane protein 63a (Tmem63a), mRNA.	21.8259	4.66199e-07	4.22776e-05	NaN	0.00147972	4.48591	479.201	44.9099	2149.65	175.541
58	76	Nkx3.1CE2/+; Ptenf/f castrated-veh	UNC93B1	Mus musculus unc-93 homolog B1 (C. elegans) (Unc93b1), mRNA.	21.1049	5.09997e-07	4.49647e-05	NaN	0.00161873	3.55744	750.505	55.2183	2669.88	207.894
3161	49	Nkx3.1CE2/+ -veh	EMCN	Mus musculus endomucin (Emcn), mRNA.	-26.7979	5.57271e-07	4.78048e-05	NaN	0.00176878	3.48129	2532.69	27.317	727.515	165.853
44	60	Nkx3.1CE2/+; Ptenf/f castrated-veh	ATP1A1	Mus musculus ATPase, Na+/K+ transporting, alpha 1 polypeptide (Atp1a1), mRNA.	23.0444	6.30386e-07	5.2052e-05	NaN	0.00200085	2.83524	6719.78	256.745	19052.2	1249.1
28	39	Nkx3.1CE2/+; Ptenf/f castrated-veh	RAP1GAP	Mus musculus Rap1 GTPase-activating protein (Rap1gap), mRNA.	28.7505	6.3958e-07	5.2052e-05	NaN	0.00203003	11.1916	153.252	12.6476	1715.14	131.596
74	93	Nkx3.1CE2/+; Ptenf/f castrated-veh	4933421H10RIK	NULL	19.1755	6.76166e-07	5.21416e-05	NaN	0.00214615	4.37437	745.567	85.4295	3261.39	295
83	105	Nkx3.1CE2/+; Ptenf/f castrated-veh	EG433865	PREDICTED: Mus musculus predicted gene, EG433865 (EG433865), mRNA.	18.794	6.84652e-07	5.21416e-05	NaN	0.00217309	8.08072	906.376	233.162	7324.17	767.169
69	88	Nkx3.1CE2/+; Ptenf/f castrated-veh	MFAP3L	Mus musculus microfibrillar-associated protein 3-like (Mfap3l), mRNA.	19.6472	6.89964e-07	5.21416e-05	NaN	0.00218995	2.80694	151.844	8.87164	426.217	31.8185
73	92	Nkx3.1CE2/+; Ptenf/f castrated-veh	AGFG2	Mus musculus ArfGAP with FG repeats 2 (Agfg2), transcript variant 1, mRNA.	19.3313	7.0957e-07	5.23762e-05	NaN	0.00225218	3.5792	1037.06	157.238	3711.86	254.675
78	99	Nkx3.1CE2/+; Ptenf/f castrated-veh	6330442E10RIK	Mus musculus RIKEN cDNA 6330442E10 gene (6330442E10Rik), mRNA.	19.0393	7.56147e-07	5.45457e-05	NaN	0.00240001	2.83001	245.918	15.4227	695.951	53.5945
89	111	Nkx3.1CE2/+; Ptenf/f castrated-veh	FBXO4	Mus musculus F-box protein 4 (Fbxo4), mRNA.	18.3433	8.10865e-07	5.7193e-05	NaN	0.00257369	2.98033	570.999	42.0196	1701.77	138.672
72	91	Nkx3.1CE2/+; Ptenf/f castrated-veh	MLLT3	Mus musculus myeloid/lymphoid or mixed-lineage leukemia (trithorax homolog, Drosophila); translocated to, 3 (Mllt3), transcript variant 1, mRNA.	19.3789	8.53574e-07	5.88966e-05	NaN	0.00270924	3.21469	178.079	12.4767	572.467	46.6076
110	135	Nkx3.1CE2/+; Ptenf/f castrated-veh	FAM129B	Mus musculus family with sequence similarity 129, member B (Fam129b), mRNA.	17.0846	8.72951e-07	5.89521e-05	NaN	0.00277075	3.05065	2947.16	376.85	8990.74	683.052
1	1	Nkx3.1CE2/+; Ptenf/f castrated-veh	CTSB	Mus musculus cathepsin B (Ctsb), mRNA.	531.007	9.32855e-07	6.07126e-05	NaN	0.00296088	4.03538	4956.16	25.1667	20000	0
46	62	Nkx3.1CE2/+; Ptenf/f castrated-veh	ABCD3	NULL	22.6699	9.37278e-07	6.07126e-05	NaN	0.00297492	4.96026	1601.17	121.494	7942.22	662.146
77	98	Nkx3.1CE2/+; Ptenf/f castrated-veh	LASP1	Mus musculus LIM and SH3 protein 1 (Lasp1), mRNA.	19.0511	9.95764e-07	6.23723e-05	NaN	0.00316055	2.82237	5613.84	324.491	15844.3	1232.16
132	161	Nkx3.1CE2/+; Ptenf/f castrated-veh	MYLC2B	Mus musculus myosin light chain, regulatory B (Mylc2b), mRNA.	15.7792	1.0022e-06	6.23723e-05	NaN	0.00318099	2.91727	5717.57	617.24	16679.7	1456.61
135	164	Nkx3.1CE2/+; Ptenf/f castrated-veh	LOC100044475	PREDICTED: Mus musculus similar to SH2/SH3 adaptor protein (LOC100044475), mRNA.	15.6459	1.03994e-06	6.34761e-05	NaN	0.00330076	3.87105	653.828	110.023	2531	248.59
50	67	Nkx3.1CE2/+; Ptenf/f castrated-veh	MYO18A	Mus musculus myosin XVIIIa (Myo18a), mRNA.	21.9188	1.09189e-06	6.53899e-05	NaN	0.00346567	3.79432	253.744	14.0316	962.787	76.1859
138	167	Nkx3.1CE2/+; Ptenf/f castrated-veh	LZTS2	Mus musculus leucine zipper, putative tumor suppressor 2 (Lzts2), mRNA.	15.4806	1.19267e-06	6.86994e-05	NaN	0.00378552	2.52925	910.223	76.1751	2302.18	190.699
96	120	Nkx3.1CE2/+; Ptenf/f castrated-veh	IRF1	Mus musculus interferon regulatory factor 1 (Irf1), mRNA.	17.721	1.20046e-06	6.86994e-05	NaN	0.00381027	3.91099	1945.1	362.921	7607.26	590.693
68	87	Nkx3.1CE2/+; Ptenf/f castrated-veh	TCIRG1	Mus musculus T-cell, immune regulator 1, ATPase, H+ transporting, lysosomal V0 protein A3 (Tcirg1), mRNA.	19.6497	1.21209e-06	6.86994e-05	NaN	0.00384716	5.79283	479.648	62.0056	2778.52	271.24
144	176	Nkx3.1CE2/+; Ptenf/f castrated-veh	LEFTY1	Mus musculus left right determination factor 1 (Lefty1), mRNA.	15.2506	1.25912e-06	7.01133e-05	NaN	0.00399646	3.06059	182.081	23.2808	557.275	50.4216
59	77	Nkx3.1CE2/+; Ptenf/f castrated-veh	PSMB10	Mus musculus proteasome (prosome, macropain) subunit, beta type 10 (Psmb10), mRNA.	21.0361	1.39328e-06	7.57925e-05	NaN	0.00442228	6.54906	727.697	83.6538	4765.73	453.487
146	178	Nkx3.1CE2/+; Ptenf/f castrated-veh	OBRGRP	NULL	15.0193	1.40887e-06	7.57925e-05	NaN	0.00447176	2.44652	1887.21	152.749	4617.1	383.352
113	139	Nkx3.1CE2/+; Ptenf/f castrated-veh	EGFR	NULL	16.884	1.43712e-06	7.59644e-05	NaN	0.00456141	3.56293	566.312	57.6179	2017.73	193.67
57	74	Nkx3.1CE2/+; Ptenf/f castrated-veh	SLC25A24	Mus musculus solute carrier family 25 (mitochondrial carrier, phosphate carrier), member 24 (Slc25a24), mRNA.	21.1706	1.45993e-06	7.59644e-05	NaN	0.00463383	4.74875	170.685	12.4945	810.54	71.337
127	156	Nkx3.1CE2/+; Ptenf/f castrated-veh	APLP2	Mus musculus amyloid beta (A4) precursor-like protein 2 (Aplp2), transcript variant 3, mRNA.	16.0943	1.57157e-06	8.04545e-05	NaN	0.00498818	2.88694	4326.16	362.86	12489.4	1129.99
39	53	Nkx3.1CE2/+; Ptenf/f castrated-veh	TACSTD2	Mus musculus tumor-associated calcium signal transducer 2 (Tacstd2), mRNA.	24.5361	1.65503e-06	8.3382e-05	NaN	0.00525307	43.7186	392.831	112.075	17174	1649.75
55	72	Nkx3.1CE2/+; Ptenf/f castrated-veh	PHCA	Mus musculus phytoceramidase, alkaline (Phca), mRNA.	21.4512	1.69758e-06	8.41895e-05	NaN	0.00538813	10.0623	401.335	64.0215	4038.34	405.207
84	106	Nkx3.1CE2/+; Ptenf/f castrated-veh	FZD6	Mus musculus frizzled homolog 6 (Drosophila) (Fzd6), mRNA.	18.5675	1.78549e-06	8.7187e-05	NaN	0.00566716	4.34451	347.037	31.8162	1507.71	144.428
128	157	Nkx3.1CE2/+; Ptenf/f castrated-veh	FAM102A	Mus musculus family with sequence similarity 102, member A (Fam102a), mRNA.	15.9177	1.81715e-06	8.73882e-05	NaN	0.00576762	3.14651	2088.96	310.403	6572.94	522.523
88	110	Nkx3.1CE2/+; Ptenf/f castrated-veh	CTTNBP2NL	Mus musculus CTTNBP2 N-terminal like (Cttnbp2nl), mRNA.	18.3591	1.86375e-06	8.77084e-05	NaN	0.00591556	2.87323	211.209	11.4736	606.851	50.2282
168	206	Nkx3.1CE2/+; Ptenf/f castrated-veh	GNG12	Mus musculus guanine nucleotide binding protein (G protein), gamma 12 (Gng12), mRNA.	14.4673	1.87907e-06	8.77084e-05	NaN	0.00596417	3.07207	743.919	92.4636	2285.37	225.55
157	194	Nkx3.1CE2/+; Ptenf/f castrated-veh	SRI	Mus musculus sorcin (Sri), transcript variant 1, mRNA.	14.7012	1.96798e-06	8.95186e-05	NaN	0.00624636	3.69566	1517.56	223.729	5608.41	602.25
169	207	Nkx3.1CE2/+; Ptenf/f castrated-veh	GSTO1	Mus musculus glutathione S-transferase omega 1 (Gsto1), mRNA.	14.3553	1.97426e-06	8.95186e-05	NaN	0.0062663	5.01214	3737.08	878.574	18730.7	2213.77
142	172	Nkx3.1CE2/+; Ptenf/f castrated-veh	E330036I19RIK	Mus musculus RIKEN cDNA E330036I19 gene (E330036I19Rik), mRNA.	15.2718	2.15156e-06	9.4319e-05	NaN	0.00682905	2.74877	744.919	60.8201	2047.61	189.368
76	96	Nkx3.1CE2/+; Ptenf/f castrated-veh	CMBL	Mus musculus carboxymethylenebutenolidase-like (Pseudomonas) (Cmbl), mRNA.	19.059	2.15552e-06	9.4319e-05	NaN	0.00684162	4.30507	139.4	11.0978	600.127	56.9106
67	86	Nkx3.1CE2/+; Ptenf/f castrated-veh	MSL2L1	PREDICTED: Mus musculus male-specific lethal 2-like 1 (Drosophila) (Msl2l1), mRNA.	19.7538	2.16928e-06	9.4319e-05	NaN	0.00688528	3.34121	255.322	12.5686	853.084	71.638
130	159	Nkx3.1CE2/+; Ptenf/f castrated-veh	KRT19	Mus musculus keratin 19 (Krt19), mRNA.	15.8182	2.32765e-06	9.9304e-05	NaN	0.00738795	5.85981	2994.69	606.521	17548.3	2082.98
185	228	Nkx3.1CE2/+; Ptenf/f castrated-veh	MCC	Mus musculus mutated in colorectal cancers (Mcc), mRNA.	14.0523	2.3465e-06	9.9304e-05	NaN	0.0074478	4.66495	538.659	120.588	2512.82	298.862
187	230	Nkx3.1CE2/+; Ptenf/f castrated-veh	ARL6IP5	Mus musculus ADP-ribosylation factor-like 6 interacting protein 5 (Arl6ip5), mRNA.	14.0152	2.39244e-06	9.9916e-05	NaN	0.00759362	3.02712	318.341	39.3746	963.657	97.9959
140	170	Nkx3.1CE2/+; Ptenf/f castrated-veh	LAMB3	Mus musculus laminin, beta 3 (Lamb3), mRNA.	15.4047	2.51354e-06	0.00010361	NaN	0.00797797	4.64807	615.189	98.6993	2859.44	328.314
162	200	Nkx3.1CE2/+; Ptenf/f castrated-veh	TIMP2	Mus musculus tissue inhibitor of metalloproteinase 2 (Timp2), mRNA.	14.5589	2.55134e-06	0.00010382	NaN	0.00809797	4.26839	2699.74	456.426	11523.6	1335.31
25	36	Nkx3.1CE2/+; Ptenf/f castrated-veh	ZNRF1	Mus musculus zinc and ring finger 1 (Znrf1), mRNA.	29.2075	2.64105e-06	0.00010611	NaN	0.00838269	3.67634	329.975	40.8732	1213.1	44.7625
45	61	Nkx3.1CE2/+; Ptenf/f castrated-veh	GSDMC3	Mus musculus gasdermin C3 (Gsdmc3), mRNA.	22.7056	2.72533e-06	0.000107998	NaN	0.00865021	64.4434	187.736	45.1482	12098.4	1264.42
195	238	Nkx3.1CE2/+; Ptenf/f castrated-veh	HIST1H2BK	Mus musculus histone cluster 1, H2bk (Hist1h2bk), mRNA.	13.7851	2.77213e-06	0.000107998	NaN	0.00879874	2.67074	890.961	89.963	2379.53	231.217
90	112	Nkx3.1CE2/+; Ptenf/f castrated-veh	1700041B20RIK	PREDICTED: Mus musculus RIKEN cDNA 1700041B20 gene, transcript variant 1 (1700041B20Rik), mRNA.	18.1485	2.79012e-06	0.000107998	NaN	0.00885586	9.21873	275.507	56.1934	2539.82	291.738
182	224	Nkx3.1CE2/+; Ptenf/f castrated-veh	CD9	NULL	14.1155	2.87752e-06	0.0001091	NaN	0.00913324	3.70802	3720.4	553.5	13795.3	1562.23
112	138	Nkx3.1CE2/+; Ptenf/f castrated-veh	ENC1	Mus musculus ectodermal-neural cortex 1 (Enc1), mRNA.	16.9205	2.89891e-06	0.0001091	NaN	0.00920114	9.54946	213.678	58.1242	2040.51	251.214
52	69	Nkx3.1CE2/+; Ptenf/f castrated-veh	C2	Mus musculus complement component 2 (within H-2S) (C2), mRNA.	21.5257	2.9217e-06	0.0001091	NaN	0.00927347	12.3394	436.967	45.2951	5391.92	552.387
60	78	Nkx3.1CE2/+; Ptenf/f castrated-veh	IL28RA	Mus musculus interleukin 28 receptor alpha (Il28ra), mRNA.	20.6927	2.95616e-06	0.000109103	NaN	0.00938285	2.94664	587.206	14.2289	1730.28	131.573
210	258	Nkx3.1CE2/+; Ptenf/f castrated-veh	HS6ST1	Mus musculus heparan sulfate 6-O-sulfotransferase 1 (Hs6st1), mRNA.	13.3564	3.07738e-06	0.000112134	NaN	0.0097676	3.24518	698.222	107.595	2265.86	243.67
164	202	Nkx3.1CE2/+; Ptenf/f castrated-veh	ABCA7	Mus musculus ATP-binding cassette, sub-family A (ABC1), member 7 (Abca7), mRNA.	14.5274	3.10895e-06	0.000112134	NaN	0.00986782	2.67008	434.342	35.4963	1159.73	111.454
102	126	Nkx3.1CE2/+; Ptenf/f castrated-veh	SLC22A18	Mus musculus solute carrier family 22 (organic cation transporter), member 18 (Slc22a18), transcript variant 1, mRNA.	17.2219	3.16838e-06	0.000112256	NaN	0.0100564	3.97287	319.295	26.7976	1268.52	128.245
92	115	Nkx3.1CE2/+; Ptenf/f castrated-veh	GRB7	Mus musculus groNkx3.1CE2/+ h factor receptor bound protein 7 (Grb7), mRNA.	18.0534	3.24123e-06	0.000112256	NaN	0.0102877	3.0222	3240.94	158.735	9794.78	857.423
80	101	Nkx3.1CE2/+; Ptenf/f castrated-veh	IFITM2	Mus musculus interferon induced transmembrane protein 2 (Ifitm2), mRNA.	18.9503	3.28064e-06	0.000112256	NaN	0.0104127	6.9906	2479	298.001	17329.7	1871.97
126	155	Nkx3.1CE2/+; Ptenf/f castrated-veh	ACPP	Mus musculus acid phosphatase, prostate (Acpp), transcript variant 1, mRNA.	16.1119	3.28305e-06	0.000112256	NaN	0.0104204	4.38764	194.531	23.2861	853.532	94.5079
94	117	Nkx3.1CE2/+; Ptenf/f castrated-veh	CAPN2	NULL	17.9045	3.28917e-06	0.000112256	NaN	0.0104398	6.80354	304.01	43.6009	2068.35	232.332
177	218	Nkx3.1CE2/+; Ptenf/f castrated-veh	BTC	Mus musculus betacellulin, epidermal groNkx3.1CE2/+ h factor family member (Btc), mRNA.	14.1762	3.37301e-06	0.000113893	NaN	0.0107059	3.43594	143.631	17.9552	493.508	54.8043
100	124	Nkx3.1CE2/+; Ptenf/f castrated-veh	ACOT10	Mus musculus acyl-CoA thioesterase 10 (Acot10), mRNA.	17.4182	3.48016e-06	0.000116274	NaN	0.011046	3.32898	317.12	19.4506	1055.69	99.4337
2	3	Nkx3.1CE2/+; Ptenf/f castrated-veh	LGALS3	Mus musculus lectin, galactose binding, soluble 3 (Lgals3), mRNA.	490.974	3.54648e-06	0.000117256	NaN	0.0112565	26.5846	752.315	62.7826	20000	0
165	203	Nkx3.1CE2/+; Ptenf/f castrated-veh	SSBP2	NULL	14.5222	3.65873e-06	0.000118442	NaN	0.0116128	2.64415	293.835	37.2768	776.944	62.0985
63	81	Nkx3.1CE2/+; Ptenf/f castrated-veh	ANKRD50	Mus musculus ankrin repeat domain 50 (Ankrd50), mRNA.	20.1594	3.73457e-06	0.000118442	NaN	0.0118535	2.78755	180.817	3.56371	504.036	38.256
95	118	Nkx3.1CE2/+; Ptenf/f castrated-veh	CDC42EP5	Mus musculus CDC42 effector protein (Rho GTPase binding) 5 (Cdc42ep5), mRNA.	17.724	3.75579e-06	0.000118442	NaN	0.0119209	3.87963	725.759	49.0932	2815.68	277.361
224	273	Nkx3.1CE2/+; Ptenf/f castrated-veh	DCBLD1	Mus musculus discoidin, CUB and LCCL domain containing 1 (Dcbld1), mRNA.	13.0317	3.76885e-06	0.000118442	NaN	0.0119623	3.12487	203.709	32.75	636.566	66.2916
66	85	Nkx3.1CE2/+; Ptenf/f castrated-veh	0610012G03RIK	NULL	19.8376	3.78564e-06	0.000118442	NaN	0.0120156	4.85896	659.589	34.5847	3204.92	308.778
159	197	Nkx3.1CE2/+; Ptenf/f castrated-veh	FEM1C	NULL	14.6209	3.82885e-06	0.000118442	NaN	0.0121528	3.29816	281.496	28.8928	928.418	100.051
120	149	Nkx3.1CE2/+; Ptenf/f castrated-veh	TMEM132A	Mus musculus transmembrane protein 132A (Tmem132a), mRNA.	16.277	3.84357e-06	0.000118442	NaN	0.0121995	5.23324	236.038	32.2726	1235.24	143.041
139	168	Nkx3.1CE2/+; Ptenf/f castrated-veh	2410025L10RIK	Mus musculus RIKEN cDNA 2410025L10 gene (2410025L10Rik), mRNA.	15.4092	3.97292e-06	0.000121231	NaN	0.01261	4.79947	1264.59	180.178	6069.37	716.286
231	281	Nkx3.1CE2/+; Ptenf/f castrated-veh	AA536749	NULL	12.9262	4.03163e-06	0.000121231	NaN	0.0127964	2.52097	2251.9	260.312	5676.97	533.261
56	73	Nkx3.1CE2/+; Ptenf/f castrated-veh	LTF	Mus musculus lactotransferrin (Ltf), mRNA.	21.3262	4.05679e-06	0.000121231	NaN	0.0128763	112.28	170.261	28.4806	19116.9	2163.12
64	83	Nkx3.1CE2/+; Ptenf/f castrated-veh	SEMA3F	Mus musculus sema domain, immunoglobulin domain (Ig), short basic domain, secreted, (semaphorin) 3F (Sema3f), mRNA.	20.0991	4.08685e-06	0.000121231	NaN	0.0129717	9.48336	307.55	29.2824	2916.61	314.3
3	4	Nkx3.1CE2/+; Ptenf/f castrated-veh	LOC100048733	PREDICTED: Mus musculus similar to WAP four-disulfide core domain 2 (LOC100048733), mRNA.	426.367	4.1484e-06	0.000121917	NaN	0.013167	106.303	188.142	69.892	20000	0
148	182	Nkx3.1CE2/+; Ptenf/f castrated-veh	BC003236	NULL	14.9696	4.39925e-06	0.000128103	NaN	0.0139632	2.88635	170.216	12.8237	491.303	49.2296
245	295	Nkx3.1CE2/+; Ptenf/f castrated-veh	MORC3	Mus musculus microrchidia 3 (Morc3), mRNA. XM_978468 XM_978538 XM_978584 XM_978615	12.6793	4.45532e-06	0.000128556	NaN	0.0141412	3.1355	701.847	104.828	2200.64	248.386
115	141	Nkx3.1CE2/+; Ptenf/f castrated-veh	9530018I07RIK	NULL	16.7892	4.5401e-06	0.000129822	NaN	0.0144103	4.38804	1010.88	93.2056	4435.79	481.902
250	300	Nkx3.1CE2/+; Ptenf/f castrated-veh	PLEKHG3	Mus musculus pleckstrin homology domain containing, family G (with RhoGef domain) member 3 (Plekhg3), mRNA.	12.6553	4.7734e-06	0.00013518	NaN	0.0151508	3.22788	1760.43	264.657	5682.45	660.277
75	94	Nkx3.1CE2/+; Ptenf/f castrated-veh	NFKBIE	Mus musculus nuclear factor of kappa light polypeptide gene enhancer in B-cells inhibitor, epsilon (Nfkbie), mRNA.	19.1165	4.81263e-06	0.00013518	NaN	0.0152753	5.2357	155.369	8.89114	813.463	83.1199
79	100	Nkx3.1CE2/+; Ptenf/f castrated-veh	ELF3	Mus musculus E74-like factor 3 (Elf3), mRNA.	18.9577	4.9532e-06	0.000137908	NaN	0.0157215	18.2221	398.085	94.2468	7253.93	871.909
104	129	Nkx3.1CE2/+; Ptenf/f castrated-veh	2011-09-09	Mus musculus septin 9 (Sept9), mRNA.	17.1633	5.07241e-06	0.000139998	NaN	0.0160998	7.30154	232.044	34.1398	1694.28	202.488
179	220	Nkx3.1CE2/+; Ptenf/f castrated-veh	NFE2L2	Mus musculus nuclear factor, erythroid derived 2, like 2 (Nfe2l2), mRNA.	14.1406	5.19545e-06	0.000141323	NaN	0.0164904	4.80621	234.393	39.9565	1126.54	143.46
186	229	Nkx3.1CE2/+; Ptenf/f castrated-veh	SEMA4B	Mus musculus sema domain, immunoglobulin domain (Ig), transmembrane domain (TM) and short cytoplasmic domain, (semaphorin) 4B (Sema4b), mRNA.	14.0242	5.20944e-06	0.000141323	NaN	0.0165348	3.06166	1076.67	179.953	3296.4	291.455
239	289	Nkx3.1CE2/+; Ptenf/f castrated-veh	CD47	Mus musculus CD47 antigen (Rh-related antigen, integrin-associated signal transducer) (Cd47), mRNA.	12.7725	5.31424e-06	0.000141701	NaN	0.0168674	4.15258	813.128	158.37	3376.58	437.561
81	102	Nkx3.1CE2/+; Ptenf/f castrated-veh	SIX1	Mus musculus sine oculis-related homeobox 1 homolog (Drosophila) (Six1), mRNA.	18.8652	5.34175e-06	0.000141701	NaN	0.0169547	12.0908	210.466	30.0671	2544.7	298.708
211	259	Nkx3.1CE2/+; Ptenf/f castrated-veh	PLXNB2	PREDICTED: Mus musculus plexin B2, transcript variant 13 (Plxnb2), mRNA.	13.3544	5.36636e-06	0.000141701	NaN	0.0170328	3.21395	1122.54	132.053	3607.79	415.765
108	133	Nkx3.1CE2/+; Ptenf/f castrated-veh	FNDC5	Mus musculus fibronectin type III domain containing 5 (Fndc5), mRNA.	17.0902	5.43208e-06	0.000141701	NaN	0.0172414	6.12139	171.799	20.1725	1051.65	122.659
4	5	Nkx3.1CE2/+; Ptenf/f castrated-veh	NUPR1	Mus musculus nuclear protein 1 (Nupr1), mRNA.	194.712	5.50084e-06	0.000141701	NaN	0.0174597	40.6746	491.708	79.2495	20000	0
70	89	Nkx3.1CE2/+; Ptenf/f castrated-veh	NAIP5	Mus musculus NLR family, apoptosis inhibitory protein 5 (Naip5), mRNA.	19.4243	5.54081e-06	0.000141701	NaN	0.0175865	8.86201	141.648	8.38867	1255.28	138.333
91	114	Nkx3.1CE2/+; Ptenf/f castrated-veh	ICAM1	Mus musculus intercellular adhesion molecule 1 (Icam1), mRNA.	18.1125	5.64474e-06	0.000141701	NaN	0.0179164	10.4222	275.088	42.689	2867.02	344.583
156	193	Nkx3.1CE2/+; Ptenf/f castrated-veh	MBP	Mus musculus myelin basic protein (Mbp), transcript variant 7, mRNA.	14.7294	5.69896e-06	0.000141701	NaN	0.0180885	3.38642	997.262	91.6155	3377.15	373.917
173	213	Nkx3.1CE2/+; Ptenf/f castrated-veh	SFT2D2	Mus musculus SFT2 domain containing 2 (Sft2d2), mRNA.	14.3104	5.70193e-06	0.000141701	NaN	0.0180979	5.66157	1054.64	207.103	5970.93	788.847
37	51	Nkx3.1CE2/+; Ptenf/f castrated-veh	PSME1	Mus musculus proteasome (prosome, macropain) 28 subunit, alpha (Psme1), mRNA.	24.8262	5.74056e-06	0.000141701	NaN	0.0182206	3.30495	4556.61	577.501	15059.4	631.67
172	212	Nkx3.1CE2/+; Ptenf/f castrated-veh	SLC6A8	Mus musculus solute carrier family 6 (neurotransmitter transporter, creatine), member 8 (Slc6a8), mRNA.	14.3112	5.76679e-06	0.000141701	NaN	0.0183038	4.42605	921.197	132.344	4077.26	506.606
103	127	Nkx3.1CE2/+; Ptenf/f castrated-veh	CSF1	Mus musculus colony stimulating factor 1 (macrophage) (Csf1), mRNA.	17.2062	5.78038e-06	0.000141701	NaN	0.0183469	4.72063	153.85	12.2502	726.27	79.5516
82	104	Nkx3.1CE2/+; Ptenf/f castrated-veh	CYBA	Mus musculus cytochrome b-245, alpha polypeptide (Cyba), mRNA.	18.826	5.80375e-06	0.000141701	NaN	0.0184211	15.168	638.586	106.36	9686.1	1165.08
124	153	Nkx3.1CE2/+; Ptenf/f castrated-veh	CCDC23	Mus musculus coiled-coil domain containing 23 (Ccdc23), transcript variant 1, mRNA.	16.1417	5.86476e-06	0.000142097	NaN	0.0186147	2.61609	849.126	37.7051	2221.39	200.581
264	318	Nkx3.1CE2/+; Ptenf/f castrated-veh	BC039210	PREDICTED: Mus musculus cDNA sequence BC039210 (BC039210), mRNA.	12.3843	6.02252e-06	0.000144288	NaN	0.0191155	2.8952	296.093	36.3641	857.25	97.8249
93	116	Nkx3.1CE2/+; Ptenf/f castrated-veh	MIDN	Mus musculus midnolin (Midn), mRNA.	17.9791	6.04608e-06	0.000144288	NaN	0.0191903	3.86707	1395.75	63.4517	5397.48	535.488
269	324	Nkx3.1CE2/+; Ptenf/f castrated-veh	NAT2	Mus musculus N-acetyltransferase 2 (arylamine N-acetyltransferase) (Nat2), mRNA.	12.3092	6.14917e-06	0.000144442	NaN	0.0195175	2.95095	242.751	31.5747	716.348	82.8992
229	279	Nkx3.1CE2/+; Ptenf/f castrated-veh	IL13RA1	Mus musculus interleukin 13 receptor, alpha 1 (Il13ra1), mRNA.	12.9515	6.16439e-06	0.000144442	NaN	0.0195658	2.5476	815.808	106.366	2078.35	185.152
122	151	Nkx3.1CE2/+; Ptenf/f castrated-veh	CGN	NULL	16.223	6.18909e-06	0.000144442	NaN	0.0196442	3.31293	848.569	51.5924	2811.25	286.479
233	283	Nkx3.1CE2/+; Ptenf/f castrated-veh	MAPK13	Mus musculus mitogen-activated protein kinase 13 (Mapk13), mRNA.	12.8929	6.42525e-06	0.000148859	NaN	0.0203937	5.51355	458.118	114.638	2525.86	356.759
212	260	Nkx3.1CE2/+; Ptenf/f castrated-veh	TLR5	NULL	13.3178	6.59276e-06	0.000150421	NaN	0.0209254	3.04407	230.369	23.3654	701.261	79.8013
291	351	Nkx3.1CE2/+; Ptenf/f castrated-veh	SH3RF1	Mus musculus SH3 domain containing ring finger 1 (Sh3rf1), mRNA.	11.9584	6.60092e-06	0.000150421	NaN	0.0209513	2.46408	1153.59	125.898	2842.54	296.487
3130	244	Nkx3.1CE2/+ -veh	PDIA5	Mus musculus protein disulfide isomerase associated 5 (Pdia5), mRNA.	-13.7631	6.63483e-06	0.000150421	NaN	0.0210589	2.34585	879.961	23.1604	375.113	84.1964
136	165	Nkx3.1CE2/+; Ptenf/f castrated-veh	PNPLA7	Mus musculus patatin-like phospholipase domain containing 7 (Pnpla7), mRNA.	15.6422	6.75647e-06	0.000152092	NaN	0.021445	2.66439	256.265	12.4432	682.789	64.4153
263	317	Nkx3.1CE2/+; Ptenf/f castrated-veh	TRIM21	Mus musculus tripartite motif-containing 21 (Trim21), transcript variant 1, mRNA.	12.4372	6.9072e-06	0.000154391	NaN	0.0219235	3.1222	393.864	51.0853	1229.72	147.736
3137	195	Nkx3.1CE2/+ -veh	RTN2	Mus musculus reticulon 2 (Z-band associated protein) (Rtn2), transcript variant B, mRNA.	-14.7409	6.97372e-06	0.000154787	NaN	0.0221346	2.51636	469.159	23.0365	186.444	33.959
86	108	Nkx3.1CE2/+; Ptenf/f castrated-veh	LOC676389	PREDICTED: Mus musculus similar to Baculoviral IAP repeat-containing protein 1e (Neuronal apoptosis inhibitory protein 5) (LOC676389), misc RNA.	18.411	7.16133e-06	0.000157848	NaN	0.02273	9.30015	129.178	9.96847	1201.38	141.231
131	160	Nkx3.1CE2/+; Ptenf/f castrated-veh	FAT1	Mus musculus FAT tumor suppressor homolog 1 (Drosophila) (Fat1), mRNA.	15.8123	7.31414e-06	0.000160104	NaN	0.0232151	3.18218	1659.83	283.645	5281.87	392.021
143	174	Nkx3.1CE2/+; Ptenf/f castrated-veh	TSPAN14	Mus musculus tetraspanin 14 (Tspan14), mRNA.	15.2615	7.52838e-06	0.000162519	NaN	0.0238951	2.75628	1539.72	81.908	4243.91	417.977
298	359	Nkx3.1CE2/+; Ptenf/f castrated-veh	HNRNPH1	Mus musculus heterogeneous nuclear ribonucleoprotein H1 (Hnrnph1), mRNA.	11.7996	7.57984e-06	0.000162519	NaN	0.0240584	3.38405	910.469	182.898	3081.07	367.786
272	328	Nkx3.1CE2/+; Ptenf/f castrated-veh	ZFP710	Mus musculus zinc finger protein 710 (Zfp710), mRNA.	12.2537	7.61466e-06	0.000162519	NaN	0.0241689	2.43286	673.515	59.8781	1638.57	173.162
200	245	Nkx3.1CE2/+; Ptenf/f castrated-veh	A130010C12RIK	NULL	13.6366	7.62926e-06	0.000162519	NaN	0.0242153	3.83289	1074.49	134.166	4118.39	512.286
207	254	Nkx3.1CE2/+; Ptenf/f castrated-veh	CXADR	Mus musculus coxsackie virus and adenovirus receptor (Cxadr), transcript variant 1, mRNA.	13.4341	7.86349e-06	0.000166391	NaN	0.0249587	6.52534	690.019	173.839	4502.61	649.019
251	301	Nkx3.1CE2/+; Ptenf/f castrated-veh	TTC22	Mus musculus tetratricopeptide repeat domain 22 (Ttc22), mRNA.	12.6366	7.96189e-06	0.000167358	NaN	0.025271	2.77517	178.622	17.458	495.707	56.1884
87	109	Nkx3.1CE2/+; Ptenf/f castrated-veh	BARX2	Mus musculus BarH-like homeobox 2 (Barx2), mRNA.	18.3601	8.08119e-06	0.000168748	NaN	0.0256497	24.1809	167.921	23.9583	4060.48	516.774
118	144	Nkx3.1CE2/+; Ptenf/f castrated-veh	RAB19	Mus musculus RAB19, member RAS oncogene family (Rab19), mRNA.	16.63	8.16555e-06	0.000169395	NaN	0.0259174	3.30012	204.19	8.82265	673.852	67.561
241	291	Nkx3.1CE2/+; Ptenf/f castrated-veh	ZDHHC3	Mus musculus zinc finger, DHHC domain containing 3 (Zdhhc3), mRNA.	12.7361	8.34536e-06	0.000172001	NaN	0.0264882	2.72313	158.334	14.4265	431.164	48.2736
208	255	Nkx3.1CE2/+; Ptenf/f castrated-veh	EML4	Mus musculus echinoderm microtubule associated protein like 4 (Eml4), mRNA.	13.4188	8.47661e-06	0.000173579	NaN	0.0269047	3.71823	553.37	67.1028	2057.55	257.324
99	123	Nkx3.1CE2/+; Ptenf/f castrated-veh	EMP2	Mus musculus epithelial membrane protein 2 (Emp2), mRNA.	17.5355	8.62317e-06	0.000175448	NaN	0.0273699	11.3138	276.519	32.2917	3128.47	393.543
141	171	Nkx3.1CE2/+; Ptenf/f castrated-veh	CTSH	Mus musculus cathepsin H (Ctsh), mRNA.	15.342	8.77155e-06	0.000175636	NaN	0.0278409	9.77369	1165.57	275.639	11391.9	1578.67
192	235	Nkx3.1CE2/+; Ptenf/f castrated-veh	NET1	Mus musculus neuroepithelial cell transforming gene 1 (Net1), transcript variant 2, mRNA.	13.898	8.77695e-06	0.000175636	NaN	0.027858	4.99501	274.368	42.952	1370.47	183.021
313	378	Nkx3.1CE2/+; Ptenf/f castrated-veh	SSBP4	NULL	11.5836	8.81252e-06	0.000175636	NaN	0.027971	4.07904	700.195	155.912	2856.12	398.435
326	394	Nkx3.1CE2/+; Ptenf/f castrated-veh	LOC100046855	PREDICTED: Mus musculus similar to BKLF (LOC100046855), mRNA.	11.4248	8.85374e-06	0.000175636	NaN	0.0281018	4.41823	965.274	263.052	4264.81	601.592
295	356	Nkx3.1CE2/+; Ptenf/f castrated-veh	NAPRT1	Mus musculus nicotinate phosphoribosyltransferase domain containing 1 (Naprt1), mRNA.	11.8352	9.11113e-06	0.000179619	NaN	0.0289187	2.73058	749.458	115.676	2046.45	211.914
284	342	Nkx3.1CE2/+; Ptenf/f castrated-veh	4933412E12RIK	NULL	12.0487	9.24647e-06	0.000181162	NaN	0.0293483	2.71667	184.195	19.084	500.396	58.0251
111	136	Nkx3.1CE2/+; Ptenf/f castrated-veh	B3GNT3	NULL	16.9294	9.38339e-06	0.000182064	NaN	0.0297829	6.25873	203.13	14.4904	1271.34	151.775
201	246	Nkx3.1CE2/+; Ptenf/f castrated-veh	ARPC1B	Mus musculus actin related protein 2/3 complex, subunit 1B (Arpc1b), mRNA.	13.6184	9.42941e-06	0.000182064	NaN	0.0299289	3.128	2730.11	237.089	8539.77	988.232
109	134	Nkx3.1CE2/+; Ptenf/f castrated-veh	PLEKHB2	Mus musculus pleckstrin homology domain containing, family B (evectins) member 2 (Plekhb2), mRNA.	17.0871	9.46455e-06	0.000182064	NaN	0.0300405	4.93277	1009.61	52.8878	4980.19	564.155
338	408	Nkx3.1CE2/+; Ptenf/f castrated-veh	EHD4	NULL	11.2715	9.78087e-06	0.000187015	NaN	0.0310445	2.46866	2125.9	264.951	5248.1	565.377
98	122	Nkx3.1CE2/+; Ptenf/f castrated-veh	IL1RN	Mus musculus interleukin 1 receptor antagonist (Il1rn), transcript variant 2, mRNA.	17.6328	9.8594e-06	0.000187388	NaN	0.0312937	8.61257	133.133	6.73339	1146.62	140.161
225	275	Nkx3.1CE2/+; Ptenf/f castrated-veh	PGPEP1	Mus musculus pyroglutamyl-peptidase I (Pgpep1), mRNA.	13.0269	9.95576e-06	0.000188093	NaN	0.0315996	3.11595	365.623	35.8581	1139.26	136.287
261	314	Nkx3.1CE2/+; Ptenf/f castrated-veh	TBL1XR1	Mus musculus transducin (beta)-like 1X-linked receptor 1 (Tbl1xr1), mRNA.	12.4604	1.00799e-05	0.000188501	NaN	0.0319937	3.39337	324.925	41.3895	1102.59	141.196
330	398	Nkx3.1CE2/+; Ptenf/f castrated-veh	HPS1	Mus musculus Hermansky-Pudlak syndrome 1 homolog (human) (Hps1), mRNA.	11.4065	1.0241e-05	0.000188501	NaN	0.032505	2.65255	312.984	37.1495	830.203	97.8182
174	214	Nkx3.1CE2/+; Ptenf/f castrated-veh	NELF	Mus musculus nasal embryonic LHRH factor (Nelf), transcript variant 2, mRNA.	14.2687	1.03404e-05	0.000188501	NaN	0.0328203	6.1422	440.727	74.9674	2707.03	373.153
319	385	Nkx3.1CE2/+; Ptenf/f castrated-veh	LRIG1	Mus musculus leucine-rich repeats and immunoglobulin-like domains 1 (Lrig1), mRNA.	11.515	1.03486e-05	0.000188501	NaN	0.0328464	2.51363	185.79	25.448	467.007	47.7607
97	121	Nkx3.1CE2/+; Ptenf/f castrated-veh	CAR13	Mus musculus carbonic anhydrase 13 (Car13), mRNA.	17.6711	1.035e-05	0.000188501	NaN	0.0328508	31.1106	143.436	12.347	4462.39	596.734
275	331	Nkx3.1CE2/+; Ptenf/f castrated-veh	C77080	Mus musculus expressed sequence C77080 (C77080), mRNA.	12.2107	1.04177e-05	0.000188501	NaN	0.0330658	3.20131	1442.1	289.814	4616.6	484.887
117	143	Nkx3.1CE2/+; Ptenf/f castrated-veh	POR	Mus musculus P450 (cytochrome) oxidoreductase (Por), mRNA.	16.7449	1.04516e-05	0.000188501	NaN	0.0331735	3.57409	802.716	158.793	2868.98	201.248
308	372	Nkx3.1CE2/+; Ptenf/f castrated-veh	2900026A02RIK	Mus musculus RIKEN cDNA 2900026A02 gene (2900026A02Rik), mRNA.	11.6231	1.05769e-05	0.000188501	NaN	0.033571	3.28418	481.646	72.2746	1581.81	207.863
134	163	Nkx3.1CE2/+; Ptenf/f castrated-veh	EVPL	Mus musculus envoplakin (Evpl), mRNA.	15.6788	1.05953e-05	0.000188501	NaN	0.0336295	5.23736	217.665	19.3939	1139.99	140.666
116	142	Nkx3.1CE2/+; Ptenf/f castrated-veh	PDLIM1	Mus musculus PDZ and LIM domain 1 (elfin) (Pdlim1), mRNA.	16.7844	1.06617e-05	0.000188501	NaN	0.0338403	14.5474	757.868	131.874	11025	1486.29
107	132	Nkx3.1CE2/+; Ptenf/f castrated-veh	COBL	Mus musculus cordon-bleu (Cobl), mRNA.	17.1138	1.06659e-05	0.000188501	NaN	0.0338534	4.98238	157.177	6.05772	783.114	89.0729
101	125	Nkx3.1CE2/+; Ptenf/f castrated-veh	CDCA7	Mus musculus cell division cycle associated 7 (Cdca7), mRNA.	17.3869	1.06901e-05	0.000188501	NaN	0.0339302	6.23219	293.082	9.69511	1826.54	215.211
279	337	Nkx3.1CE2/+; Ptenf/f castrated-veh	GAPDH	Mus musculus glyceraldehyde-3-phosphate dehydrogenase (Gapdh), mRNA.	12.1438	1.07829e-05	0.000189088	NaN	0.0342249	2.60419	6437.41	581.966	16764.2	1912.07
288	347	Nkx3.1CE2/+; Ptenf/f castrated-veh	CEPT1	Mus musculus choline/ethanolaminephosphotransferase 1 (Cept1), mRNA.	11.9935	1.09639e-05	0.000191206	NaN	0.0347994	2.94762	1481.72	168.404	4367.56	538.791
123	152	Nkx3.1CE2/+; Ptenf/f castrated-veh	SERPINB6B	Mus musculus serine (or cysteine) peptidase inhibitor, clade B, member 6b (Serpinb6b), mRNA.	16.1955	1.10628e-05	0.000191876	NaN	0.0351132	2.53078	137.917	16.6742	349.037	21.4493
328	396	Nkx3.1CE2/+; Ptenf/f castrated-veh	NFKBIZ	Mus musculus nuclear factor of kappa light polypeptide gene enhancer in B-cells inhibitor, zeta (Nfkbiz), mRNA.	11.4111	1.11715e-05	0.000192708	NaN	0.0354583	3.42321	484.81	107.769	1659.61	200.706
3103	428	Nkx3.1CE2/+ -veh	SLC7A4	Mus musculus solute carrier family 7 (cationic amino acid transporter, y+ system), member 4 (Slc7a4), mRNA.	-11.0273	1.12932e-05	0.000192997	NaN	0.0358446	2.08141	5603.85	247.963	2692.33	544.228
167	205	Nkx3.1CE2/+; Ptenf/f castrated-veh	A130062D16RIK	NULL	14.4824	1.13515e-05	0.000192997	NaN	0.0360298	3.13081	281.545	18.0032	881.462	98.1924
352	422	Nkx3.1CE2/+; Ptenf/f castrated-veh	2310079N02RIK	Mus musculus RIKEN cDNA 2310079N02 gene (2310079N02Rik), mRNA.	11.063	1.1398e-05	0.000192997	NaN	0.0361772	2.8571	782.582	128.694	2235.92	265.229
240	290	Nkx3.1CE2/+; Ptenf/f castrated-veh	4833442J19RIK	Mus musculus RIKEN cDNA 4833442J19 gene (4833442J19Rik), mRNA.	12.7518	1.14315e-05	0.000192997	NaN	0.0362834	3.49846	245.764	28.8429	859.797	110.468
181	223	Nkx3.1CE2/+; Ptenf/f castrated-veh	TSPO	Mus musculus translocator protein (Tspo), mRNA.	14.1232	1.18009e-05	0.000198181	NaN	0.0374562	4.34347	2371.91	257.167	10302.3	1325.28
202	247	Nkx3.1CE2/+; Ptenf/f castrated-veh	CHAF1B	Mus musculus chromatin assembly factor 1, subunit B (p60) (Chaf1b), mRNA.	13.61	1.19452e-05	0.000198314	NaN	0.0379142	2.6645	188.101	11.608	501.196	53.8692
106	131	Nkx3.1CE2/+; Ptenf/f castrated-veh	OSBPL3	Mus musculus oxysterol binding protein-like 3 (Osbpl3), mRNA.	17.1341	1.19479e-05	0.000198314	NaN	0.0379225	15.1468	189.449	12.5516	2869.53	382.613
114	140	Nkx3.1CE2/+; Ptenf/f castrated-veh	DTX4	Mus musculus deltex 4 homolog (Drosophila) (Dtx4), mRNA. XM_001000490	16.7919	1.20117e-05	0.000198314	NaN	0.0381251	11.6714	152.265	13.3251	1777.15	234.979
158	196	Nkx3.1CE2/+; Ptenf/f castrated-veh	GSTA4	Mus musculus glutathione S-transferase, alpha 4 (Gsta4), mRNA.	14.6626	1.20588e-05	0.000198314	NaN	0.0382746	10.9526	329.886	89.098	3613.11	532.334
190	233	Nkx3.1CE2/+; Ptenf/f castrated-veh	JUNB	Mus musculus Jun-B oncogene (Junb), mRNA.	13.9335	1.27405e-05	0.000208444	NaN	0.0404382	3.09065	615.562	42.2806	1902.49	218.014
152	186	Nkx3.1CE2/+; Ptenf/f castrated-veh	C1QB	Mus musculus complement component 1, q subcomponent, beta polypeptide (C1qb), mRNA.	14.8362	1.30442e-05	0.00021232	NaN	0.0414024	8.50721	594.484	105.971	5057.4	716.629
311	376	Nkx3.1CE2/+; Ptenf/f castrated-veh	USP6NL	Mus musculus USP6 N-terminal like (Usp6nl), transcript variant 1, mRNA.	11.5992	1.32272e-05	0.000214102	NaN	0.0419832	2.94693	262.933	48.6399	774.846	83.3056
170	209	Nkx3.1CE2/+; Ptenf/f castrated-veh	RNF208	Mus musculus ring finger protein 208 (Rnf208), mRNA.	14.328	1.33162e-05	0.000214102	NaN	0.0422657	4.64441	205.163	21.1874	952.862	124.014
205	251	Nkx3.1CE2/+; Ptenf/f castrated-veh	RHBDF1	Mus musculus rhomboid family 1 (Drosophila) (Rhbdf1), mRNA.	13.4816	1.33561e-05	0.000214102	NaN	0.0423923	2.58783	2220.57	316.424	5746.46	453.894
302	364	Nkx3.1CE2/+; Ptenf/f castrated-veh	LDHD	Mus musculus lactate dehydrogenase D (Ldhd), nuclear gene encoding mitochondrial protein, mRNA.	11.7269	1.35329e-05	0.000215147	NaN	0.0429534	2.50601	234.852	20.5309	588.54	67.8407
246	296	Nkx3.1CE2/+; Ptenf/f castrated-veh	ATHL1	Mus musculus ATH1, acid trehalase-like 1 (yeast) (Athl1), mRNA.	12.6755	1.35569e-05	0.000215147	NaN	0.0430294	3.2285	188.548	18.9183	608.726	76.6376
362	436	Nkx3.1CE2/+; Ptenf/f castrated-veh	NFKBIA	Mus musculus nuclear factor of kappa light polypeptide gene enhancer in B-cells inhibitor, alpha (Nfkbia), mRNA.	10.8735	1.37286e-05	0.000216789	NaN	0.0435746	2.69189	1356.39	214.537	3651.26	416.915
214	262	Nkx3.1CE2/+; Ptenf/f castrated-veh	RHOG	Mus musculus ras homolog gene family, member G (Rhog), mRNA.	13.3115	1.41026e-05	0.000220833	NaN	0.0447616	2.61875	499.902	30.1525	1309.12	142.646
369	444	Nkx3.1CE2/+; Ptenf/f castrated-veh	MLP	NULL	10.714	1.41239e-05	0.000220833	NaN	0.0448292	2.77179	150.06	20.6306	415.933	52.7847
119	146	Nkx3.1CE2/+; Ptenf/f castrated-veh	CD14	Mus musculus CD14 antigen (Cd14), mRNA.	16.3011	1.43455e-05	0.0002232	NaN	0.0455328	22.961	288.799	5.26642	6631.1	934.15
155	191	Nkx3.1CE2/+; Ptenf/f castrated-veh	BC023151	NULL	14.7311	1.4627e-05	0.000224355	NaN	0.046426	2.48089	139.994	4.78535	347.311	33.7676
180	222	Nkx3.1CE2/+; Ptenf/f castrated-veh	TGFBR2	Mus musculus transforming groNkx3.1CE2/+ h factor, beta receptor II (Tgfbr2), transcript variant 1, mRNA.	14.1351	1.47109e-05	0.000224355	NaN	0.0466923	7.53509	1176.74	218.64	8866.87	1295.73
317	383	Nkx3.1CE2/+; Ptenf/f castrated-veh	EML3	Mus musculus echinoderm microtubule associated protein like 3 (Eml3), mRNA.	11.5323	1.47381e-05	0.000224355	NaN	0.0467787	2.28835	480.187	59.7549	1098.83	100.563
320	386	Nkx3.1CE2/+; Ptenf/f castrated-veh	SLC39A6	Mus musculus solute carrier family 39 (metal ion transporter), member 6 (Slc39a6), mRNA.	11.514	1.48806e-05	0.000224355	NaN	0.0472309	2.60376	447.637	42.8917	1165.54	140.15
307	370	Nkx3.1CE2/+; Ptenf/f castrated-veh	8430410A17RIK	Mus musculus RIKEN cDNA 8430410A17 gene (8430410A17Rik), mRNA.	11.6341	1.49412e-05	0.000224355	NaN	0.0474235	2.96873	203.524	38.7165	604.208	64.0262
294	354	Nkx3.1CE2/+; Ptenf/f castrated-veh	PITPNA	Mus musculus phosphatidylinositol transfer protein, alpha (Pitpna), mRNA.	11.8672	1.49498e-05	0.000224355	NaN	0.0474507	2.77371	1572.32	268.145	4361.17	431.242
125	154	Nkx3.1CE2/+; Ptenf/f castrated-veh	GARNL4	Mus musculus GTPase activating RANGAP domain-like 4 (Garnl4), mRNA.	16.1291	1.49754e-05	0.000224355	NaN	0.0475318	9.52804	195.48	14.5518	1862.54	252.137
384	466	Nkx3.1CE2/+; Ptenf/f castrated-veh	OLFM4	Mus musculus olfactomedin 4 (Olfm4), mRNA.	10.5139	1.50493e-05	0.000224355	NaN	0.0477664	6.01097	366.065	161.17	2200.4	359.94
209	256	Nkx3.1CE2/+; Ptenf/f castrated-veh	RHOD	Mus musculus ras homolog gene family, member D (Rhod), mRNA.	13.3665	1.5056e-05	0.000224355	NaN	0.0477876	3.90365	271.559	27.594	1060.07	138.545
376	457	Nkx3.1CE2/+; Ptenf/f castrated-veh	HOMER2	NULL	10.6285	1.52979e-05	0.000226894	NaN	0.0485554	5.66716	238.632	89.0701	1352.37	223.582
133	162	Nkx3.1CE2/+; Ptenf/f castrated-veh	CCHCR1	Mus musculus coiled-coil alpha-helical rod protein 1 (Cchcr1), mRNA.	15.7641	1.5388e-05	0.000227169	NaN	0.0488414	4.29996	181.373	7.23736	779.896	92.3464
389	471	Nkx3.1CE2/+; Ptenf/f castrated-veh	TRP53I11	Mus musculus transformation related protein 53 inducible protein 11 (Trp53i11), mRNA.	10.4551	1.57589e-05	0.000231569	NaN	0.0500189	2.80041	149.648	24.5621	419.076	52.4283
121	150	Nkx3.1CE2/+; Ptenf/f castrated-veh	SOCS3	Mus musculus suppressor of cytokine signaling 3 (Socs3), mRNA.	16.2624	1.59146e-05	0.000231759	NaN	0.0505128	6.03699	161.506	1.1545	975.011	122.412
161	199	Nkx3.1CE2/+; Ptenf/f castrated-veh	PPM1M	Mus musculus protein phosphatase 1M (Ppm1m), transcript variant 2, mRNA.	14.5731	1.59213e-05	0.000231759	NaN	0.0505342	3.44461	292.933	16.2109	1009.04	117.946
129	158	Nkx3.1CE2/+; Ptenf/f castrated-veh	CD276	Mus musculus CD276 antigen (Cd276), mRNA.	15.8252	1.5991e-05	0.000231759	NaN	0.0507553	8.23422	135.277	8.82807	1113.9	150.077
189	232	Nkx3.1CE2/+; Ptenf/f castrated-veh	4933428A15RIK	NULL	13.9442	1.61461e-05	0.000232123	NaN	0.0512476	4.27112	519.932	48.3963	2220.69	290.732
249	299	Nkx3.1CE2/+; Ptenf/f castrated-veh	SMO	Mus musculus smoothened homolog (Drosophila) (Smo), mRNA.	12.6577	1.61623e-05	0.000232123	NaN	0.0512993	4.60728	254.845	38.524	1174.14	169.187
265	320	Nkx3.1CE2/+; Ptenf/f castrated-veh	AVPI1	Mus musculus arginine vasopressin-induced 1 (Avpi1), mRNA.	12.3505	1.63446e-05	0.000233683	NaN	0.0518777	3.04964	486.291	95.2754	1483.01	143.91
153	189	Nkx3.1CE2/+; Ptenf/f castrated-veh	ITGB4	Mus musculus integrin beta 4 (Itgb4), transcript variant 1, mRNA.	14.7616	1.66239e-05	0.000236432	NaN	0.0527643	6.6668	831.342	91.61	5542.39	766.938
336	404	Nkx3.1CE2/+; Ptenf/f castrated-veh	ADPGK	NULL	11.2803	1.66858e-05	0.000236432	NaN	0.0529607	2.61599	165.065	26.2845	431.809	44.2224
137	166	Nkx3.1CE2/+; Ptenf/f castrated-veh	2510049J12RIK	PREDICTED: Mus musculus RIKEN cDNA 2510049J12 gene, transcript variant 1 (2510049J12Rik), mRNA.	15.5672	1.68745e-05	0.000238043	NaN	0.0535597	6.17982	129.157	7.03296	798.167	104.29
160	198	Nkx3.1CE2/+; Ptenf/f castrated-veh	RBMS1	NULL	14.5989	1.71185e-05	0.000240416	NaN	0.0543341	7.41682	351.964	47.0311	2610.45	372.481
364	439	Nkx3.1CE2/+; Ptenf/f castrated-veh	CAPG	Mus musculus capping protein (actin filament), gelsolin-like (Capg), transcript variant 1, mRNA.	10.8363	1.73414e-05	0.000242475	NaN	0.0550417	6.18187	649.566	232.793	4015.53	685.087
393	475	Nkx3.1CE2/+; Ptenf/f castrated-veh	4632427E13RIK	NULL	10.4399	1.75454e-05	0.000244251	NaN	0.0556892	2.37757	411.407	45.4775	978.148	116.3
149	183	Nkx3.1CE2/+; Ptenf/f castrated-veh	CX3CL1	Mus musculus chemokine (C-X3-C motif) ligand 1 (Cx3cl1), mRNA.	14.9663	1.77144e-05	0.000245527	NaN	0.0562256	8.28014	295.189	35.5095	2444.2	348.04
163	201	Nkx3.1CE2/+; Ptenf/f castrated-veh	ATP10B	Mus musculus ATPase, class V, type 10B (Atp10b), mRNA.	14.5359	1.88929e-05	0.000259449	NaN	0.0599661	9.34227	181.956	28.933	1699.88	252.087
380	461	Nkx3.1CE2/+; Ptenf/f castrated-veh	3110004L20RIK	Mus musculus RIKEN cDNA 3110004L20 gene (3110004L20Rik), mRNA.	10.5863	1.90395e-05	0.000259449	NaN	0.0604315	2.50847	319.591	34.8873	801.685	99.8661
416	500	Nkx3.1CE2/+; Ptenf/f castrated-veh	OBFC2A	Mus musculus oligonucleotide/oligosaccharide-binding fold containing 2A (Obfc2a), mRNA.	10.1671	1.9098e-05	0.000259449	NaN	0.0606171	2.61007	148.575	22.1535	387.792	48.2918
176	217	Nkx3.1CE2/+; Ptenf/f castrated-veh	LOC332300	NULL	14.1888	1.92017e-05	0.000259449	NaN	0.0609463	5.22169	180.434	16.9866	942.17	129.168
418	502	Nkx3.1CE2/+; Ptenf/f castrated-veh	TMC7	Mus musculus transmembrane channel-like gene family 7 (Tmc7), mRNA.	10.153	1.92513e-05	0.000259449	NaN	0.0611035	5.9013	231.387	101.733	1365.49	232.35
405	489	Nkx3.1CE2/+; Ptenf/f castrated-veh	HN1	Mus musculus hematological and neurological expressed sequence 1 (Hn1), mRNA.	10.3336	1.92746e-05	0.000259449	NaN	0.0611775	2.72808	3721.83	632.947	10153.5	1232.12
222	271	Nkx3.1CE2/+; Ptenf/f castrated-veh	SECTM1B	Mus musculus secreted and transmembrane 1B (Sectm1b), mRNA.	13.128	1.92911e-05	0.000259449	NaN	0.06123	8.25563	193.815	46.33	1600.07	253.363
147	179	Nkx3.1CE2/+; Ptenf/f castrated-veh	CDH3	Mus musculus cadherin 3 (Cdh3), transcript variant 1, mRNA.	14.9913	1.9544e-05	0.000261741	NaN	0.0620327	3.98722	176.136	6.84862	702.295	85.2625
150	184	Nkx3.1CE2/+; Ptenf/f castrated-veh	POF1B	Mus musculus premature ovarian failure 1B (Pof1b), mRNA.	14.9343	1.97599e-05	0.000263521	NaN	0.0627179	3.45953	420.544	13.7484	1454.88	168.167
145	177	Nkx3.1CE2/+; Ptenf/f castrated-veh	CAPSL	Mus musculus calcyphosine-like (Capsl), mRNA.	15.1964	2.00944e-05	0.00026686	NaN	0.0637796	9.71921	149.21	11.3269	1450.2	208.346
382	463	Nkx3.1CE2/+; Ptenf/f castrated-veh	A630097D09RIK	NULL	10.5558	2.03081e-05	0.000268575	NaN	0.0644581	2.69304	294.58	35.5639	793.316	104.123
293	353	Nkx3.1CE2/+; Ptenf/f castrated-veh	DTNBP1	NULL	11.8958	2.10323e-05	0.000276997	NaN	0.0667564	2.44045	1721.28	247.129	4200.71	371.93
363	438	Nkx3.1CE2/+; Ptenf/f castrated-veh	MGMT	NULL	10.8473	2.1313e-05	0.000279226	NaN	0.0676475	2.66191	202.953	21.3072	540.242	69.7509
216	264	Nkx3.1CE2/+; Ptenf/f castrated-veh	TSC22D4	Mus musculus TSC22 domain family, member 4 (Tsc22d4), mRNA.	13.2955	2.13774e-05	0.000279226	NaN	0.067852	3.90048	408.07	34.6386	1591.67	212.323
3159	57	Nkx3.1CE2/+ -veh	NXF7	Mus musculus nuclear RNA export factor 7 (Nxf7), mRNA.	-24.561	2.15175e-05	0.00027959	NaN	0.0682966	4.08868	673.586	30.4922	164.744	29.1317
306	368	Nkx3.1CE2/+; Ptenf/f castrated-veh	BRI3	NULL	11.6501	2.15814e-05	0.00027959	NaN	0.0684995	2.58202	3970.2	633.18	10251.1	970.104
289	348	Nkx3.1CE2/+; Ptenf/f castrated-veh	AKR1B8	Mus musculus aldo-keto reductase family 1, member B8 (Akr1b8), mRNA.	11.9661	2.17425e-05	0.000280036	NaN	0.0690108	4.03	245.365	33.1805	988.819	144.406
355	426	Nkx3.1CE2/+; Ptenf/f castrated-veh	MAP3K14	NULL	11.0157	2.17923e-05	0.000280036	NaN	0.0691689	2.46658	199.189	17.4716	491.316	60.0414
151	185	Nkx3.1CE2/+; Ptenf/f castrated-veh	SLC4A2	Mus musculus solute carrier family 4 (anion exchanger), member 2 (Slc4a2), mRNA.	14.9316	2.18897e-05	0.000280153	NaN	0.069478	3.53001	743.868	18.3927	2625.86	307.581
365	440	Nkx3.1CE2/+; Ptenf/f castrated-veh	LYNX1	Mus musculus Ly6/neurotoxin 1 (Lynx1), mRNA.	10.8176	2.22849e-05	0.000284065	NaN	0.0707322	3.62871	237.158	39.1552	860.578	129.586
316	382	Nkx3.1CE2/+; Ptenf/f castrated-veh	CASP8	Mus musculus caspase 8 (Casp8), transcript variant 2, mRNA.	11.5364	2.27187e-05	0.000288437	NaN	0.0721092	3.34145	706.596	82.6952	2361.06	330.629
412	496	Nkx3.1CE2/+; Ptenf/f castrated-veh	INTS7	Mus musculus integrator complex subunit 7 (Ints7), mRNA.	10.2474	2.28598e-05	0.000289072	NaN	0.072557	2.46667	344.961	38.2415	850.904	107.967
323	390	Nkx3.1CE2/+; Ptenf/f castrated-veh	BC024997	Mus musculus cDNA sequence BC024997 (BC024997), mRNA.	11.484	2.31877e-05	0.000291257	NaN	0.0735977	2.46916	141.993	10.563	350.604	41.9119
219	268	Nkx3.1CE2/+; Ptenf/f castrated-veh	HES6	Mus musculus hairy and enhancer of split 6 (Drosophila) (Hes6), mRNA.	13.2147	2.32161e-05	0.000291257	NaN	0.0736879	5.33031	321.782	39.0877	1715.2	251.59
348	418	Nkx3.1CE2/+; Ptenf/f castrated-veh	STK24	NULL	11.1265	2.34585e-05	0.000291683	NaN	0.0744574	2.3814	814.114	116.185	1938.73	184.479
396	478	Nkx3.1CE2/+; Ptenf/f castrated-veh	MYO1E	NULL	10.4138	2.35241e-05	0.000291683	NaN	0.0746654	3.06068	586.469	85.2503	1794.99	257.283
285	344	Nkx3.1CE2/+; Ptenf/f castrated-veh	FLOT2	Mus musculus flotillin 2 (Flot2), transcript variant 2, mRNA.	12.0395	2.35258e-05	0.000291683	NaN	0.0746708	2.62669	2111.02	145.099	5545	667.287
213	261	Nkx3.1CE2/+; Ptenf/f castrated-veh	AMPD3	Mus musculus adenosine monophosphate deaminase 3 (Ampd3), mRNA.	13.3136	2.36779e-05	0.000292279	NaN	0.0751536	6.70997	227.293	34.8396	1525.13	233.566
371	450	Nkx3.1CE2/+; Ptenf/f castrated-veh	D230014K01RIK	Mus musculus RIKEN cDNA D230014K01 gene (D230014K01Rik), mRNA.	10.669	2.3758e-05	0.000292279	NaN	0.075408	4.31217	183.49	39.1484	791.24	127.95
322	388	Nkx3.1CE2/+; Ptenf/f castrated-veh	TBC1D1	Mus musculus TBC1 domain family, member 1 (Tbc1d1), mRNA.	11.4843	2.44286e-05	0.000299369	NaN	0.0775365	3.1226	268.911	28.0035	839.702	114.796
154	190	Nkx3.1CE2/+; Ptenf/f castrated-veh	BHLHB2	Mus musculus basic helix-loop-helix domain containing, class B2 (Bhlhb2), mRNA.	14.7455	2.48133e-05	0.000302026	NaN	0.0787574	17.5251	301.202	29.7133	5278.59	824.862
395	477	Nkx3.1CE2/+; Ptenf/f castrated-veh	SERTAD4	Mus musculus SERTA domain containing 4 (Sertad4), mRNA.	10.4187	2.48358e-05	0.000302026	NaN	0.0788288	4.13831	327.815	70.7014	1356.6	219.967
421	505	Nkx3.1CE2/+; Ptenf/f castrated-veh	CALM3	Mus musculus calmodulin 3 (Calm3), mRNA.	10.1406	2.51653e-05	0.000304865	NaN	0.0798746	2.44695	3446.54	521.295	8433.51	952.079
271	326	Nkx3.1CE2/+; Ptenf/f castrated-veh	LOC100047260	PREDICTED: Mus musculus similar to heparan sulfate 6-sulfotransferase 1 (LOC100047260), mRNA.	12.2634	2.5654e-05	0.000309205	NaN	0.0814257	2.75734	287.979	50.4818	794.055	71.1186
166	204	Nkx3.1CE2/+; Ptenf/f castrated-veh	EPSTI1	Mus musculus epithelial stromal interaction 1 (breast) (Epsti1), transcript variant a, mRNA.	14.4864	2.57184e-05	0.000309205	NaN	0.08163	6.32495	145.343	6.9135	919.288	130.176
242	292	Nkx3.1CE2/+; Ptenf/f castrated-veh	UBE1L	Mus musculus ubiquitin-activating enzyme E1-like (Ube1l), mRNA.	12.7251	2.58171e-05	0.00030922	NaN	0.0819433	5.57705	1206.3	174.55	6727.6	1032.8
324	391	Nkx3.1CE2/+; Ptenf/f castrated-veh	A230050P20RIK	Mus musculus RIKEN cDNA A230050P20 gene (A230050P20Rik), mRNA.	11.4531	2.6161e-05	0.000312162	NaN	0.0830351	4.39467	726.642	118.446	3193.35	498.763
230	280	Nkx3.1CE2/+; Ptenf/f castrated-veh	MIR16	Mus musculus membrane interacting protein of RGS16 (Mir16), mRNA.	12.9472	2.64708e-05	0.000314675	NaN	0.0840182	9.80397	1275.84	319.721	12508.3	2075.68
238	288	Nkx3.1CE2/+; Ptenf/f castrated-veh	VARS2	Mus musculus valyl-tRNA synthetase 2, mitochondrial (putative) (Vars2), mRNA.	12.7742	2.65929e-05	0.000314932	NaN	0.0844059	5.19348	140.374	17.5209	729.028	109.587
297	358	Nkx3.1CE2/+; Ptenf/f castrated-veh	CYTIP	Mus musculus cytohesin 1 interacting protein (Cytip), mRNA.	11.8249	2.66908e-05	0.000314932	NaN	0.0847167	3.09603	978.392	209.542	3029.13	304.182
459	548	Nkx3.1CE2/+; Ptenf/f castrated-veh	6330403E01RIK	NULL	9.7413	2.69396e-05	0.00031669	NaN	0.0855062	2.71943	313.327	47.2156	852.07	117.863
256	308	Nkx3.1CE2/+; Ptenf/f castrated-veh	H3F3A	Mus musculus H3 histone, family 3A (H3f3a), mRNA.	12.5115	2.71709e-05	0.000318231	NaN	0.0862405	3.04614	3739.49	758.461	11391	1041.49
471	563	Nkx3.1CE2/+; Ptenf/f castrated-veh	PDGFA	NULL	9.62897	2.74766e-05	0.000320627	NaN	0.0872107	2.87234	1463.31	269.117	4203.13	583.424
228	278	Nkx3.1CE2/+; Ptenf/f castrated-veh	MYO9B	Mus musculus myosin IXb (Myo9b), mRNA.	12.9638	2.7898e-05	0.000324352	NaN	0.0885481	3.80708	715.507	53.9746	2723.99	371.315
171	210	Nkx3.1CE2/+; Ptenf/f castrated-veh	TNFAIP8	Mus musculus tumor necrosis factor, alpha-induced protein 8 (Tnfaip8), mRNA.	14.3143	2.883e-05	0.000333534	NaN	0.0915065	5.99968	330.348	9.7212	1981.98	282.025
443	530	Nkx3.1CE2/+; Ptenf/f castrated-veh	CEBPB	Mus musculus CCAAT/enhancer binding protein (C/EBP), beta (Cebpb), mRNA.	9.85239	2.89376e-05	0.000333534	NaN	0.091848	3.48846	1436.8	281.673	5012.21	791.892
3162	47	Nkx3.1CE2/+ -veh	H47	Mus musculus histocompatibility 47 (H47), mRNA.	-28.405	2.90029e-05	0.000333534	NaN	0.0920552	4.24001	12943.5	544.78	3052.71	473.067
236	286	Nkx3.1CE2/+; Ptenf/f castrated-veh	ANKRD37	Mus musculus ankyrin repeat domain 37 (Ankrd37), mRNA.	12.835	2.92735e-05	0.000333833	NaN	0.0929142	5.02209	194.185	21.2563	975.216	145.788
404	488	Nkx3.1CE2/+; Ptenf/f castrated-veh	KCTD12B	Mus musculus potassium channel tetramerisation domain containing 12b (Kctd12b), mRNA.	10.3446	2.93023e-05	0.000333833	NaN	0.0930056	2.39404	190.165	28.6129	455.262	47.9697
296	357	Nkx3.1CE2/+; Ptenf/f castrated-veh	BC023744	Mus musculus cDNA sequence BC023744 (BC023744), mRNA. XM_923702	11.8287	2.93445e-05	0.000333833	NaN	0.0931395	4.11456	466.292	58.6377	1918.59	288.91
426	510	Nkx3.1CE2/+; Ptenf/f castrated-veh	DCTD	Mus musculus dCMP deaminase (Dctd), mRNA.	10.0704	2.94667e-05	0.000334027	NaN	0.0935274	2.3559	222.977	21.8853	525.312	66.6372
407	491	Nkx3.1CE2/+; Ptenf/f castrated-veh	HEBP2	Mus musculus heme binding protein 2 (Hebp2), mRNA.	10.3088	2.99629e-05	0.000337663	NaN	0.0951023	3.069	188.063	25.6834	577.166	84.8924
482	575	Nkx3.1CE2/+; Ptenf/f castrated-veh	FLNB	Mus musculus filamin, beta (Flnb), mRNA. XM_904364 XM_990154	9.54692	3.00274e-05	0.000337663	NaN	0.0953071	3.34376	962.553	205.23	3218.54	500.567
175	215	Nkx3.1CE2/+; Ptenf/f castrated-veh	MMP14	NULL	14.2017	3.0178e-05	0.000337663	NaN	0.095785	9.2569	553.137	14.068	5120.33	783.79
461	550	Nkx3.1CE2/+; Ptenf/f castrated-veh	GNAL1	Mus musculus guanine nucleotide binding protein-like 1 (Gnal1), mRNA.	9.70081	3.0213e-05	0.000337663	NaN	0.0958962	2.5791	708.973	92.6474	1828.51	250.011
183	225	Nkx3.1CE2/+; Ptenf/f castrated-veh	FAM110A	Mus musculus family with sequence similarity 110, member A (Fam110a), transcript variant 1, mRNA.	14.0822	3.04964e-05	0.000338337	NaN	0.0967954	2.46682	415.228	56.3185	1024.29	69.4788
390	472	Nkx3.1CE2/+; Ptenf/f castrated-veh	9030024J15RIK	NULL	10.4509	3.0541e-05	0.000338337	NaN	0.0969372	2.8394	564.369	64.9972	1602.47	225.174
191	234	Nkx3.1CE2/+; Ptenf/f castrated-veh	2010016I18RIK	NULL	13.9231	3.06855e-05	0.000338337	NaN	0.0973959	6.79042	146.322	9.16632	993.59	148.384
244	294	Nkx3.1CE2/+; Ptenf/f castrated-veh	D930007N19RIK	NULL	12.6918	3.06998e-05	0.000338337	NaN	0.097441	4.12419	142.462	12.3897	587.543	83.9879
425	509	Nkx3.1CE2/+; Ptenf/f castrated-veh	RUNX1	Mus musculus runt related transcription factor 1 (Runx1), mRNA.	10.0793	3.08112e-05	0.00033839	NaN	0.0977948	4.14092	155.682	34.5114	644.667	108.12
290	350	Nkx3.1CE2/+; Ptenf/f castrated-veh	ZDHHC13	Mus musculus zinc finger, DHHC domain containing 13 (Zdhhc13), mRNA.	11.9624	3.09306e-05	0.00033853	NaN	0.0981737	3.39717	641.715	57.4796	2180.02	304.221
178	219	Nkx3.1CE2/+; Ptenf/f castrated-veh	PLEKHA2	Mus musculus pleckstrin homology domain-containing, family A (phosphoinositide binding specific) member 2 (Plekha2), mRNA.	14.173	3.11684e-05	0.000339829	NaN	0.0989286	7.34936	655.926	12.6427	4820.64	719.394
215	263	Nkx3.1CE2/+; Ptenf/f castrated-veh	TGIF1	Mus musculus TGFB-induced factor homeobox 1 (Tgif1), mRNA.	13.3052	3.12634e-05	0.000339829	NaN	0.0992301	4.06302	533.025	31.8842	2165.69	297.029
257	309	Nkx3.1CE2/+; Ptenf/f castrated-veh	GJB3	Mus musculus gap junction protein, beta 3 (Gjb3), mRNA.	12.4741	3.14562e-05	0.000339899	NaN	0.0998419	3.67376	307.375	24.4349	1129.22	157.145
268	323	Nkx3.1CE2/+; Ptenf/f castrated-veh	IMPA2	Mus musculus inositol (myo)-1(or 4)-monophosphatase 2 (Impa2), mRNA.	12.3201	3.1484e-05	0.000339899	NaN	0.0999304	2.68271	162.442	8.80154	435.784	52.8997
3153	103	Nkx3.1CE2/+ -veh	USP16	Mus musculus ubiquitin specific peptidase 16 (Usp16), mRNA.	-19.0856	3.16576e-05	0.000340614	NaN	0.100481	2.52	2971.21	132.878	1179.05	136.664
184	226	Nkx3.1CE2/+; Ptenf/f castrated-veh	MAP3K1	Mus musculus mitogen-activated protein kinase kinase kinase 1 (Map3k1), mRNA.	14.0533	3.20578e-05	0.000343755	NaN	0.101751	6.05507	1168.49	22.1014	7075.31	1026.97
203	248	Nkx3.1CE2/+; Ptenf/f castrated-veh	RASSF5	Mus musculus Ras association (RalGDS/AF-6) domain family 5 (Rassf5), mRNA.	13.5945	3.22283e-05	0.00034442	NaN	0.102293	4.99151	269.141	15.189	1343.42	192.148
503	600	Nkx3.1CE2/+; Ptenf/f castrated-veh	TRMT2B	Mus musculus TRM2 tRNA methyltransferase 2 homolog B (S. cerevisiae) (Trmt2b), mRNA.	9.37807	3.26052e-05	0.000347278	NaN	0.103489	2.47636	332.843	48.8253	824.239	108.175
315	381	Nkx3.1CE2/+; Ptenf/f castrated-veh	GEMIN4	Mus musculus gem (nuclear organelle) associated protein 4 (Gemin4), mRNA.	11.5556	3.2745e-05	0.0003476	NaN	0.103933	4.20005	329.466	44.1239	1383.77	214.538
262	316	Nkx3.1CE2/+; Ptenf/f castrated-veh	D230046F09RIK	NULL	12.4498	3.31083e-05	0.000350092	NaN	0.105086	2.51734	153.972	6.79988	387.601	44.909
331	399	Nkx3.1CE2/+; Ptenf/f castrated-veh	PAFAH1B3	Mus musculus platelet-activating factor acetylhydrolase, isoform 1b, alpha1 subunit (Pafah1b3), mRNA.	11.3964	3.32164e-05	0.000350092	NaN	0.105429	2.86135	1474.04	120.199	4217.75	564.142
266	321	Nkx3.1CE2/+; Ptenf/f castrated-veh	TSPAN17	Mus musculus tetraspanin 17 (Tspan17), mRNA.	12.3248	3.33105e-05	0.000350092	NaN	0.105728	3.91902	539.004	47.845	2112.36	304.624
193	236	Nkx3.1CE2/+; Ptenf/f castrated-veh	LGMN	Mus musculus legumain (Lgmn), mRNA.	13.856	3.36345e-05	0.000350664	NaN	0.106756	8.16717	562.441	22.8745	4593.55	709.736
337	406	Nkx3.1CE2/+; Ptenf/f castrated-veh	AI481316	NULL	11.2755	3.36618e-05	0.000350664	NaN	0.106843	3.12436	557.601	53.8484	1742.15	245.69
204	249	Nkx3.1CE2/+; Ptenf/f castrated-veh	TTYH3	Mus musculus tweety homolog 3 (Drosophila) (Ttyh3), mRNA.	13.55	3.36964e-05	0.000350664	NaN	0.106952	4.33086	196.611	8.17371	851.497	117.431
469	561	Nkx3.1CE2/+; Ptenf/f castrated-veh	D6WSU176E	NULL	9.63623	3.39668e-05	0.000352323	NaN	0.107811	2.97274	1070.26	230.862	3181.6	425.504
221	270	Nkx3.1CE2/+; Ptenf/f castrated-veh	GP49A	NULL	13.1625	3.43143e-05	0.000354768	NaN	0.108914	6.37879	153.593	15.2846	979.74	152.156
327	395	Nkx3.1CE2/+; Ptenf/f castrated-veh	TNFSF10	Mus musculus tumor necrosis factor (ligand) superfamily, member 10 (Tnfsf10), mRNA.	11.4186	3.45238e-05	0.000355549	NaN	0.109578	2.84204	125.919	9.88622	357.867	47.7239
217	265	Nkx3.1CE2/+; Ptenf/f castrated-veh	SPECC1	Mus musculus sperm antigen with calponin homology and coiled-coil domains 1 (Specc1), mRNA.	13.2529	3.46139e-05	0.000355549	NaN	0.109865	8.20754	178.271	20.9215	1463.17	234.867
206	253	Nkx3.1CE2/+; Ptenf/f castrated-veh	MGST1	Mus musculus microsomal glutathione S-transferase 1 (Mgst1), mRNA.	13.4562	3.48938e-05	0.000357042	NaN	0.110753	16.769	635.29	129.117	10653.2	1810.98
194	237	Nkx3.1CE2/+; Ptenf/f castrated-veh	APOB48R	Mus musculus apolipoprotein B48 receptor (Apob48r), mRNA.	13.8162	3.50082e-05	0.000357042	NaN	0.111116	40.4341	164.638	14.5658	6656.98	1147.54
3096	449	Nkx3.1CE2/+ -veh	TMEM160	Mus musculus transmembrane protein 160 (Tmem160), mRNA.	-10.7078	3.50968e-05	0.000357042	NaN	0.111397	2.46079	4174.1	271.719	1696.24	417.602
282	340	Nkx3.1CE2/+; Ptenf/f castrated-veh	ELF1	Mus musculus E74-like factor 1 (Elf1), mRNA.	12.1227	3.59978e-05	0.000365038	NaN	0.114257	2.55863	745.261	36.5342	1906.85	228.841
247	297	Nkx3.1CE2/+; Ptenf/f castrated-veh	MYO6	Mus musculus myosin VI (Myo6), mRNA.	12.6745	3.62939e-05	0.000366344	NaN	0.115197	2.57748	2083.77	77.8377	5370.87	625.61
301	363	Nkx3.1CE2/+; Ptenf/f castrated-veh	SH3BP2	Mus musculus SH3-domain binding protein 2 (Sh3bp2), mRNA.	11.7404	3.63775e-05	0.000366344	NaN	0.115462	4.57463	310.773	40.6017	1421.67	224.368
518	621	Nkx3.1CE2/+; Ptenf/f castrated-veh	HMGA1	Mus musculus high mobility group AT-hook 1 (Hmga1), transcript variant 1, mRNA.	9.20702	3.64728e-05	0.000366344	NaN	0.115765	2.25926	577.874	74.5155	1305.57	161.959
496	591	Nkx3.1CE2/+; Ptenf/f castrated-veh	PLEKHG6	Mus musculus pleckstrin homology domain containing, family G (with RhoGef domain) member 6 (Plekhg6), mRNA.	9.42106	3.78131e-05	0.000378608	NaN	0.120019	3.27698	154.135	29.4537	505.098	81.137
360	432	Nkx3.1CE2/+; Ptenf/f castrated-veh	RGS12	Mus musculus regulator of G-protein signaling 12 (Rgs12), mRNA.	10.9266	3.81329e-05	0.000379678	NaN	0.121034	3.44242	216.175	24.9701	744.165	112.315
3100	437	Nkx3.1CE2/+ -veh	D630045J12RIK	NULL	-10.9251	3.81592e-05	0.000379678	NaN	0.121117	2.28305	383.613	23.6808	168.027	35.0771
43	59	Nkx3.1CE2/+; Ptenf/f castrated-veh	CTNNB1	Mus musculus catenin (cadherin associated protein), beta 1 (Ctnnb1), mRNA.	23.2226	3.84267e-05	0.000381145	NaN	0.121966	3.10605	6260.49	828.845	19445.4	743.367
237	287	Nkx3.1CE2/+; Ptenf/f castrated-veh	E130014J05RIK	NULL	12.8336	3.87494e-05	0.000382337	NaN	0.122991	3.29426	342.552	15.1389	1128.46	148.45
218	267	Nkx3.1CE2/+; Ptenf/f castrated-veh	RELB	Mus musculus avian reticuloendotheliosis viral (v-rel) oncogene related B (Relb), mRNA.	13.2503	3.87878e-05	0.000382337	NaN	0.123113	5.12036	190.278	9.4927	974.289	144.283
333	401	Nkx3.1CE2/+; Ptenf/f castrated-veh	CDH1	NULL	11.3274	3.89155e-05	0.000382408	NaN	0.123518	2.77787	2321.73	169.692	6449.47	859.075
281	339	Nkx3.1CE2/+; Ptenf/f castrated-veh	GSTT3	Mus musculus glutathione S-transferase, theta 3 (Gstt3), mRNA.	12.1282	3.91568e-05	0.000383592	NaN	0.124284	4.46393	2999.74	301.972	13390.6	2052.76
61	79	Nkx3.1CE2/+; Ptenf/f castrated-veh	LAD1	Mus musculus ladinin (Lad1), mRNA.	20.5946	3.97278e-05	0.000386698	NaN	0.126096	3.61055	675.68	122.577	2439.58	116.394
226	276	Nkx3.1CE2/+; Ptenf/f castrated-veh	MPRIP	Mus musculus myosin phosphatase Rho interacting protein (Mprip), transcript variant 1, mRNA.	12.9878	3.97809e-05	0.000386698	NaN	0.126265	2.95786	612.959	18.1621	1813.05	224.189
464	556	Nkx3.1CE2/+; Ptenf/f castrated-veh	DSP	PREDICTED: Mus musculus desmoplakin, transcript variant 1 (Dsp), mRNA.	9.67622	3.99019e-05	0.000386698	NaN	0.126649	2.67864	1732.01	214.415	4639.44	670.423
521	624	Nkx3.1CE2/+; Ptenf/f castrated-veh	LMO4	Mus musculus LIM domain only 4 (Lmo4), mRNA.	9.16551	3.99612e-05	0.000386698	NaN	0.126837	2.40727	7071.29	925.927	17022.5	2313.61
227	277	Nkx3.1CE2/+; Ptenf/f castrated-veh	CD68	Mus musculus CD68 antigen (Cd68), mRNA.	12.9782	4.02491e-05	0.000387903	NaN	0.127751	6.84545	188.226	16.8585	1288.49	206.136
486	580	Nkx3.1CE2/+; Ptenf/f castrated-veh	PANK2	Mus musculus pantothenate kinase 2 (Hallervorden-Spatz syndrome) (Pank2), nuclear gene encoding mitochondrial protein, mRNA.	9.49794	4.03302e-05	0.000387903	NaN	0.128008	2.43054	719.284	116.46	1748.25	207.308
243	293	Nkx3.1CE2/+; Ptenf/f castrated-veh	H2-DMB2	Mus musculus histocompatibility 2, class II, locus Mb2 (H2-DMb2), mRNA.	12.7071	4.15033e-05	0.000397981	NaN	0.131732	5.30474	147.733	11.7759	783.683	121.278
489	584	Nkx3.1CE2/+; Ptenf/f castrated-veh	GZMM	Mus musculus granzyme M (lymphocyte met-ase 1) (Gzmm), mRNA.	9.47065	4.20919e-05	0.000402409	NaN	0.1336	2.60749	153.586	19.2558	400.474	57.716
299	361	Nkx3.1CE2/+; Ptenf/f castrated-veh	FAM84A	Mus musculus family with sequence similarity 84, member A (Fam84a), mRNA.	11.7873	4.23133e-05	0.000402597	NaN	0.134302	4.06347	260.361	25.4448	1057.97	161.619
255	307	Nkx3.1CE2/+; Ptenf/f castrated-veh	MAML2	PREDICTED: Mus musculus mastermind like 2 (Drosophila) (Maml2), mRNA.	12.5361	4.23747e-05	0.000402597	NaN	0.134497	4.29976	309.913	21.2057	1332.55	197.507
532	638	Nkx3.1CE2/+; Ptenf/f castrated-veh	PLCL2	Mus musculus phospholipase C-like 2 (Plcl2), mRNA.	9.11587	4.25052e-05	0.000402597	NaN	0.134912	2.37311	190.869	28.9369	452.955	57.2984
487	582	Nkx3.1CE2/+; Ptenf/f castrated-veh	RNASET2	Mus musculus ribonuclease T2 (Rnaset2), transcript variant 2, mRNA.	9.48705	4.26189e-05	0.000402597	NaN	0.135272	4.39627	1878.54	490.477	8258.56	1492.04
252	302	Nkx3.1CE2/+; Ptenf/f castrated-veh	PSMB9	Mus musculus proteasome (prosome, macropain) subunit, beta type 9 (large multifunctional peptidase 2) (Psmb9), mRNA.	12.591	4.3086e-05	0.000404428	NaN	0.136755	9.00012	610.367	90.6411	5493.38	937.803
248	298	Nkx3.1CE2/+; Ptenf/f castrated-veh	RHOU	Mus musculus ras homolog gene family, member U (Rhou), mRNA.	12.6689	4.31112e-05	0.000404428	NaN	0.136835	13.6632	242.672	55.0293	3315.67	588.769
220	269	Nkx3.1CE2/+; Ptenf/f castrated-veh	MAPKAPK3	NULL	13.1675	4.31951e-05	0.000404428	NaN	0.137101	6.40207	164.221	5.0267	1051.35	164.285
485	579	Nkx3.1CE2/+; Ptenf/f castrated-veh	TMEM184B	Mus musculus transmembrane protein 184b (Tmem184b), mRNA.	9.5194	4.40349e-05	0.000409974	NaN	0.139767	2.69318	2016.32	393.432	5430.3	678.289
507	604	Nkx3.1CE2/+; Ptenf/f castrated-veh	2310061G22RIK	NULL	9.33868	4.40457e-05	0.000409974	NaN	0.139801	2.38039	132.065	20.8909	314.367	37.5301
304	366	Nkx3.1CE2/+; Ptenf/f castrated-veh	FBXO34	Mus musculus F-box protein 34 (Fbxo34), mRNA.	11.6552	4.46447e-05	0.000411554	NaN	0.141702	4.09824	306.664	30.0995	1256.78	194.025
343	413	Nkx3.1CE2/+; Ptenf/f castrated-veh	PRMT2	Mus musculus protein arginine N-methyltransferase 2 (Prmt2), transcript variant 2, mRNA.	11.2341	4.47134e-05	0.000411554	NaN	0.14192	5.29068	546.41	91.8602	2890.88	494.378
367	442	Nkx3.1CE2/+; Ptenf/f castrated-veh	ARHGEF2	NULL	10.8001	4.4764e-05	0.000411554	NaN	0.142081	2.72873	145.445	11.6698	396.881	54.5704
259	311	Nkx3.1CE2/+; Ptenf/f castrated-veh	PARP14	Mus musculus poly (ADP-ribose) polymerase family, member 14 (Parp14), mRNA. XM_901644 XM_916789 XM_924484 XM_924488	12.4705	4.48212e-05	0.000411554	NaN	0.142262	8.59714	830.229	124.799	7137.59	1225.97
286	345	Nkx3.1CE2/+; Ptenf/f castrated-veh	RAPGEFL1	Mus musculus Rap guanine nucleotide exchange factor (GEF)-like 1 (Rapgefl1), mRNA.	12.0386	4.48638e-05	0.000411554	NaN	0.142398	6.01083	363.845	48.4912	2187.01	364.537
403	487	Nkx3.1CE2/+; Ptenf/f castrated-veh	NIN	Mus musculus ninein (Nin), transcript variant 2, mRNA.	10.3471	4.55734e-05	0.000416858	NaN	0.14465	2.66566	337.926	64.2848	900.796	97.3693
235	285	Nkx3.1CE2/+; Ptenf/f castrated-veh	A330042I21RIK	NULL	12.8523	4.6263e-05	0.000421566	NaN	0.146839	9.05297	153.31	13.1896	1387.91	234.223
274	330	Nkx3.1CE2/+; Ptenf/f castrated-veh	2810022L02RIK	Mus musculus RIKEN cDNA 2810022L02 gene (2810022L02Rik), mRNA.	12.2474	4.64572e-05	0.000421566	NaN	0.147455	7.30502	222.212	31.0988	1623.27	276.731
378	459	Nkx3.1CE2/+; Ptenf/f castrated-veh	GLT25D1	Mus musculus glycosyltransferase 25 domain containing 1 (Glt25d1), mRNA.	10.6167	4.64865e-05	0.000421566	NaN	0.147548	2.7819	1849.63	160.388	5145.49	725.304
267	322	Nkx3.1CE2/+; Ptenf/f castrated-veh	COTL1	Mus musculus coactosin-like 1 (Dictyostelium) (Cotl1), mRNA.	12.3205	4.69155e-05	0.000424245	NaN	0.14891	6.90753	424.068	51.5591	2929.27	492.526
556	664	Nkx3.1CE2/+; Ptenf/f castrated-veh	CMTM7	Mus musculus CKLF-like MARVEL transmembrane domain containing 7 (Cmtm7), mRNA.	8.94962	4.71926e-05	0.000425538	NaN	0.149789	2.8442	265.85	46.0184	756.132	117.151
554	662	Nkx3.1CE2/+; Ptenf/f castrated-veh	HIF1A	NULL	8.96243	4.73522e-05	0.000425767	NaN	0.150296	3.07583	221.288	51.5592	680.647	102.171
552	660	Nkx3.1CE2/+; Ptenf/f castrated-veh	LRCH1	Mus musculus leucine-rich repeats and calponin homology (CH) domain containing 1 (Lrch1), mRNA.	8.96875	4.76004e-05	0.00042679	NaN	0.151084	2.60355	358.901	53.3898	934.416	137.824
528	634	Nkx3.1CE2/+; Ptenf/f castrated-veh	IL7	Mus musculus interleukin 7 (Il7), mRNA.	9.12068	4.82947e-05	0.000431796	NaN	0.153287	2.66503	215.643	30.5545	574.696	86.194
278	336	Nkx3.1CE2/+; Ptenf/f castrated-veh	RASA2	Mus musculus RAS p21 protein activator 2 (Rasa2), mRNA.	12.1515	4.84713e-05	0.000432157	NaN	0.153848	4.27963	262.523	19.1121	1123.5	171.355
305	367	Nkx3.1CE2/+; Ptenf/f castrated-veh	TANC1	Mus musculus tetratricopeptide repeat, ankyrin repeat and coiled-coil containing 1 (Tanc1), mRNA.	11.6536	4.88628e-05	0.000433245	NaN	0.15509	4.02734	243.506	22.1357	980.681	151.731
232	282	Nkx3.1CE2/+; Ptenf/f castrated-veh	XDH	Mus musculus xanthine dehydrogenase (Xdh), mRNA.	12.925	4.88745e-05	0.000433245	NaN	0.155128	7.2595	353.252	8.06244	2564.43	418.858
437	522	Nkx3.1CE2/+; Ptenf/f castrated-veh	RASSF7	Mus musculus Ras association (RalGDS/AF-6) domain family (N-terminal) member 7 (Rassf7), mRNA.	9.94761	4.90028e-05	0.000433245	NaN	0.155535	2.44923	677.824	59.7047	1660.15	226.458
550	658	Nkx3.1CE2/+; Ptenf/f castrated-veh	SLC25A10	Mus musculus solute carrier family 25 (mitochondrial carrier, dicarboxylate transporter), member 10 (Slc25a10), nuclear gene encoding mitochondrial protein, mRNA.	8.98577	4.92277e-05	0.000433437	NaN	0.156249	2.9296	781.986	172.917	2290.9	330.595
342	412	Nkx3.1CE2/+; Ptenf/f castrated-veh	2210412D01RIK	Mus musculus RIKEN cDNA 2210412D01 gene (2210412D01Rik), mRNA.	11.2347	4.93043e-05	0.000433437	NaN	0.156492	3.10396	283.195	21.7394	879.025	126.168
373	454	Nkx3.1CE2/+; Ptenf/f castrated-veh	TNFAIP3	Mus musculus tumor necrosis factor, alpha-induced protein 3 (Tnfaip3), mRNA.	10.6509	4.94343e-05	0.000433437	NaN	0.156904	4.15385	177.885	26.0432	738.909	123.569
292	352	Nkx3.1CE2/+; Ptenf/f castrated-veh	CAMK2N1	Mus musculus calcium/calmodulin-dependent protein kinase II inhibitor 1 (Camk2n1), mRNA.	11.8998	4.996e-05	0.00043684	NaN	0.158573	4.56293	917.125	79.8637	4184.78	659.73
314	380	Nkx3.1CE2/+; Ptenf/f castrated-veh	RTKN	Mus musculus rhotekin (Rtkn), transcript variant 1, mRNA.	11.5586	5.09222e-05	0.00044403	NaN	0.161627	2.66216	250.352	12.4592	666.478	86.213
494	589	Nkx3.1CE2/+; Ptenf/f castrated-veh	NT5C2	Mus musculus 5'-nucleotidase, cytosolic II (Nt5c2), mRNA.	9.43244	5.13119e-05	0.000446203	NaN	0.162864	2.50876	195.344	34.8654	490.07	58.5015
199	243	Nkx3.1CE2/+; Ptenf/f castrated-veh	TRAF3	Mus musculus Tnf receptor-associated factor 3 (Traf3), transcript variant 1, mRNA.	13.6483	5.15858e-05	0.000447173	NaN	0.163733	3.03808	907.03	180.064	2755.63	210.247
399	481	Nkx3.1CE2/+; Ptenf/f castrated-veh	AIM1	NULL	10.3974	5.17365e-05	0.000447173	NaN	0.164212	4.02872	555.864	83.9888	2239.42	377.988
466	558	Nkx3.1CE2/+; Ptenf/f castrated-veh	REEP6	Mus musculus receptor accessory protein 6 (Reep6), mRNA.	9.65902	5.18462e-05	0.000447173	NaN	0.16456	3.56041	566.814	95.7371	2018.09	341.803
523	626	Nkx3.1CE2/+; Ptenf/f castrated-veh	PHC1	Mus musculus polyhomeotic-like 1 (Drosophila) (Phc1), transcript variant 1, mRNA.	9.13775	5.2276e-05	0.000449659	NaN	0.165924	2.55594	446.052	81.9887	1140.08	144.844
253	304	Nkx3.1CE2/+; Ptenf/f castrated-veh	ZFP36	Mus musculus zinc finger protein 36 (Zfp36), mRNA.	12.5481	5.32368e-05	0.000456685	NaN	0.168974	2.60658	856.606	11.8434	2232.81	267.205
590	706	Nkx3.1CE2/+; Ptenf/f castrated-veh	PGCP	Mus musculus plasma glutamate carboxypeptidase (Pgcp), transcript variant 2, mRNA.	8.69289	5.35918e-05	0.000458491	NaN	0.1701	2.70121	686.178	121.207	1853.51	280.583
423	507	Nkx3.1CE2/+; Ptenf/f castrated-veh	RNF135	Mus musculus ring finger protein 135 (Rnf135), mRNA.	10.1029	5.41162e-05	0.000460849	NaN	0.171765	2.43105	899.438	70.0577	2186.57	295.313
593	709	Nkx3.1CE2/+; Ptenf/f castrated-veh	ADFP	Mus musculus adipose differentiation related protein (Adfp), mRNA.	8.68747	5.41578e-05	0.000460849	NaN	0.171897	3.04051	188.252	39.4341	572.384	92.7985
557	665	Nkx3.1CE2/+; Ptenf/f castrated-veh	IPO5	Mus musculus importin 5 (Ipo5), mRNA.	8.93905	5.43099e-05	0.000460908	NaN	0.17238	2.483	568.407	73.211	1411.35	206.176
596	712	Nkx3.1CE2/+; Ptenf/f castrated-veh	DYRK3	Mus musculus dual-specificity tyrosine-(Y)-phosphorylation regulated kinase 3 (Dyrk3), mRNA.	8.68047	5.45684e-05	0.000461867	NaN	0.1732	2.62668	190.585	34.2443	500.606	72.8452
270	325	Nkx3.1CE2/+; Ptenf/f castrated-veh	GPR137B	Mus musculus G protein-coupled receptor 137B (Gpr137b), mRNA.	12.3015	5.48568e-05	0.000462718	NaN	0.174116	2.9743	147.708	4.11253	439.328	57.7392
260	313	Nkx3.1CE2/+; Ptenf/f castrated-veh	PPP1R9B	Mus musculus protein phosphatase 1, regulatory subunit 9B (Ppp1r9b), mRNA.	12.4626	5.49606e-05	0.000462718	NaN	0.174445	3.08603	291.95	6.01814	900.967	119.322
551	659	Nkx3.1CE2/+; Ptenf/f castrated-veh	GM2A	Mus musculus GM2 ganglioside activator protein (Gm2a), mRNA.	8.97045	5.54006e-05	0.000463125	NaN	0.175842	3.52049	1029.93	219.438	3625.85	635.961
598	715	Nkx3.1CE2/+; Ptenf/f castrated-veh	PQLC1	Mus musculus PQ loop repeat containing 1 (Pqlc1), mRNA.	8.6655	5.54047e-05	0.000463125	NaN	0.175855	2.56613	1252.32	218.289	3213.62	460.368
3139	188	Nkx3.1CE2/+ -veh	GCAT	NULL	-14.8852	5.54466e-05	0.000463125	NaN	0.175988	3.92154	2462.83	169.113	628.026	185.54
347	417	Nkx3.1CE2/+; Ptenf/f castrated-veh	OPLAH	Mus musculus 5-oxoprolinase (ATP-hydrolysing) (Oplah), mRNA.	11.1508	5.62313e-05	0.000467737	NaN	0.178478	3.2477	183.828	14.0469	597.019	88.47
321	387	Nkx3.1CE2/+; Ptenf/f castrated-veh	CASP2	NULL	11.5136	5.62935e-05	0.000467737	NaN	0.178675	2.98543	1041.54	57.7738	3109.44	432.271
332	400	Nkx3.1CE2/+; Ptenf/f castrated-veh	ANXA5	Mus musculus annexin A5 (Anxa5), mRNA.	11.3355	5.69143e-05	0.000471661	NaN	0.180646	4.18027	2466.38	232.203	10310.1	1653.61
300	362	Nkx3.1CE2/+; Ptenf/f castrated-veh	GALNT3	Mus musculus UDP-N-acetyl-alpha-D-galactosamine:polypeptide N-acetylgalactosaminyltransferase 3 (Galnt3), mRNA.	11.7494	5.70763e-05	0.000471772	NaN	0.18116	3.4429	132.403	7.32877	455.849	66.4105
538	644	Nkx3.1CE2/+; Ptenf/f castrated-veh	ENTPD2	Mus musculus ectonucleoside triphosphate diphosphohydrolase 2 (Entpd2), mRNA.	9.08514	5.77414e-05	0.000475244	NaN	0.183271	3.25653	723.656	129.361	2356.6	400.297
280	338	Nkx3.1CE2/+; Ptenf/f castrated-veh	TYROBP	Mus musculus TYRO protein tyrosine kinase binding protein (Tyrobp), mRNA.	12.1392	5.77958e-05	0.000475244	NaN	0.183444	7.96567	188.844	19.8399	1504.27	263.843
3066	669	Nkx3.1CE2/+ -veh	RCSD1	Mus musculus RCSD domain containing 1 (Rcsd1), transcript variant 1, mRNA.	-9.03056	5.87714e-05	0.000482016	NaN	0.18654	2.79574	2301.25	177.356	823.128	318.841
391	473	Nkx3.1CE2/+; Ptenf/f castrated-veh	ILDR1	Mus musculus immunoglobulin-like domain containing receptor 1 (Ildr1), mRNA.	10.4487	5.90956e-05	0.000483426	NaN	0.187569	2.90468	655.962	56.726	1905.36	281.632
349	419	Nkx3.1CE2/+; Ptenf/f castrated-veh	LOC100048376	PREDICTED: Mus musculus similar to CAP-GLY domain containing linker protein family, member 4, transcript variant 1 (LOC100048376), mRNA.	11.1246	5.97061e-05	0.000486742	NaN	0.189507	3.52206	127.414	10.5362	448.759	69.1569
303	365	Nkx3.1CE2/+; Ptenf/f castrated-veh	MRC1	Mus musculus mannose receptor, C type 1 (Mrc1), mRNA.	11.7162	5.99261e-05	0.000486742	NaN	0.190205	4.74821	341.175	28.005	1619.97	264.159
611	731	Nkx3.1CE2/+; Ptenf/f castrated-veh	HIST1H2AO	Mus musculus histone cluster 1, H2ao (Hist1h2ao), mRNA.	8.55052	5.9961e-05	0.000486742	NaN	0.190316	2.64434	1832.91	338.183	4846.84	718.107
585	701	Nkx3.1CE2/+; Ptenf/f castrated-veh	SULT2B1	Mus musculus sulfotransferase family, cytosolic, 2B, member 1 (Sult2b1), mRNA.	8.71778	6.13667e-05	0.000496882	NaN	0.194778	2.51934	160.057	22.1225	403.237	60.6842
434	519	Nkx3.1CE2/+; Ptenf/f castrated-veh	5730469M10RIK	Mus musculus RIKEN cDNA 5730469M10 gene (5730469M10Rik), mRNA.	9.97074	6.16684e-05	0.000498055	NaN	0.195736	2.86822	1003.24	100.365	2877.51	437.077
612	732	Nkx3.1CE2/+; Ptenf/f castrated-veh	LRBA	Mus musculus LPS-responsive beige-like anchor (Lrba), transcript variant 1, mRNA.	8.53263	6.21928e-05	0.000501015	NaN	0.1974	2.61399	1107.9	206.743	2896.04	420.616
273	329	Nkx3.1CE2/+; Ptenf/f castrated-veh	SDCBP2	Mus musculus syndecan binding protein (syntenin) 2 (Sdcbp2), mRNA.	12.2478	6.27781e-05	0.00050445	NaN	0.199258	18.85	183.076	17.9514	3451	652.758
309	373	Nkx3.1CE2/+; Ptenf/f castrated-veh	LAMA5	Mus musculus laminin, alpha 5 (Lama5), mRNA.	11.6179	6.33528e-05	0.000507783	NaN	0.201082	4.46002	717.434	53.778	3199.77	517.577
420	504	Nkx3.1CE2/+; Ptenf/f castrated-veh	ABHD7	Mus musculus abhydrolase domain containing 7 (Abhd7), mRNA.	10.1446	6.38904e-05	0.00051012	NaN	0.202788	4.12162	160.64	24.689	662.097	115.912
234	284	Nkx3.1CE2/+; Ptenf/f castrated-veh	IRF2BP2	PREDICTED: Mus musculus interferon regulatory factor 2 binding protein 2 (Irf2bp2), mRNA.	12.8707	6.39659e-05	0.00051012	NaN	0.203028	2.8999	617.806	121.058	1791.58	142.896
375	456	Nkx3.1CE2/+; Ptenf/f castrated-veh	EG632248	PREDICTED: Mus musculus predicted gene, EG632248 (EG632248), mRNA.	10.6306	6.41281e-05	0.000510131	NaN	0.203542	2.57297	1014.75	186.04	2610.91	256.463
341	411	Nkx3.1CE2/+; Ptenf/f castrated-veh	NFE2L3	NULL	11.2389	6.44393e-05	0.000511014	NaN	0.20453	4.43067	212.05	20.4656	939.524	155.782
276	332	Nkx3.1CE2/+; Ptenf/f castrated-veh	KRT7	Mus musculus keratin 7 (Krt7), mRNA.	12.1697	6.4561e-05	0.000511014	NaN	0.204916	17.2914	222.927	13.4734	3854.72	728.293
513	612	Nkx3.1CE2/+; Ptenf/f castrated-veh	OLFR802	Mus musculus olfactory receptor 802 (Olfr802), mRNA.	9.27514	6.51374e-05	0.000513873	NaN	0.206746	2.29093	132.971	11.8284	304.626	42.0442
310	375	Nkx3.1CE2/+; Ptenf/f castrated-veh	LOC676420	PREDICTED: Mus musculus similar to ceramide kinases (LOC676420), misc RNA.	11.6067	6.5345e-05	0.000513873	NaN	0.207405	7.58596	307.456	41.4502	2332.35	422.88
422	506	Nkx3.1CE2/+; Ptenf/f castrated-veh	TBC1D2B	Mus musculus TBC1 domain family, member 2B (Tbc1d2b), mRNA.	10.1218	6.54079e-05	0.000513873	NaN	0.207605	3.40487	344.162	40.29	1171.83	191.634
400	482	Nkx3.1CE2/+; Ptenf/f castrated-veh	BCL6	Mus musculus B-cell leukemia/lymphoma 6 (Bcl6), mRNA.	10.3915	6.57638e-05	0.000515394	NaN	0.208734	3.657	955.828	110.096	3495.47	577.689
277	335	Nkx3.1CE2/+; Ptenf/f castrated-veh	CLIP4	Mus musculus CAP-GLY domain containing linker protein family, member 4 (Clip4), mRNA.	12.1573	6.59821e-05	0.000515767	NaN	0.209427	25.9873	148.476	8.73825	3858.48	746.639
458	547	Nkx3.1CE2/+; Ptenf/f castrated-veh	2310014D11RIK	NULL	9.74169	6.61365e-05	0.000515767	NaN	0.209917	3.29755	210.471	27.562	694.04	115.132
430	514	Nkx3.1CE2/+; Ptenf/f castrated-veh	DNAHC11	Mus musculus dynein, axonemal, heavy chain 11 (Dnahc11), mRNA.	10.0442	6.65337e-05	0.000517593	NaN	0.211178	2.89261	394.685	37.2823	1141.67	174.112
473	565	Nkx3.1CE2/+; Ptenf/f castrated-veh	LAT2	Mus musculus linker for activation of T cells family, member 2 (Lat2), transcript variant 2, mRNA.	9.61901	6.71661e-05	0.000521235	NaN	0.213185	3.07313	166.793	20.5023	512.577	83.056
312	377	Nkx3.1CE2/+; Ptenf/f castrated-veh	CXCL16	Mus musculus chemokine (C-X-C motif) ligand 16 (Cxcl16), mRNA.	11.5968	6.75244e-05	0.000522738	NaN	0.214322	11.216	374.712	74.2793	4202.78	801.544
442	528	Nkx3.1CE2/+; Ptenf/f castrated-veh	ACCS	Mus musculus 1-aminocyclopropane-1-carboxylate synthase homolog (Arabidopsis)(non-functional) (Accs), mRNA.	9.87993	6.77578e-05	0.000523268	NaN	0.215063	2.4951	252.473	19.7361	629.946	88.9046
358	430	Nkx3.1CE2/+; Ptenf/f castrated-veh	1190003J15RIK	Mus musculus RIKEN cDNA 1190003J15 gene (1190003J15Rik), mRNA. XM_133915 XM_900078 XM_900080 XM_900083 XM_917938 XM_925372 XM_925374 XM_925375	10.9857	6.81938e-05	0.000525357	NaN	0.216447	10.293	789.561	227.672	8126.99	1603.96
576	691	Nkx3.1CE2/+; Ptenf/f castrated-veh	LSM3	Mus musculus LSM3 homolog, U6 small nuclear RNA associated (S. cerevisiae) (Lsm3), mRNA.	8.76489	6.89487e-05	0.000529887	NaN	0.218843	2.44765	725.519	88.1116	1775.81	265.691
599	716	Nkx3.1CE2/+; Ptenf/f castrated-veh	SPINT1	Mus musculus serine protease inhibitor, Kunitz type 1 (Spint1), mRNA.	8.64674	6.92503e-05	0.000530919	NaN	0.2198	2.53579	6050.68	1142.62	15343.3	2070.91
622	748	Nkx3.1CE2/+; Ptenf/f castrated-veh	LOC100043796	PREDICTED: Mus musculus similar to macrophage migration inhibitory factor, transcript variant 1 (LOC100043796), mRNA.	8.46356	6.97186e-05	0.000532874	NaN	0.221287	2.63574	2094.17	411.457	5519.67	802.07
553	661	Nkx3.1CE2/+; Ptenf/f castrated-veh	D030041G07RIK	NULL	8.96419	6.9841e-05	0.000532874	NaN	0.221675	2.43569	366.275	40.1132	892.135	131.941
515	614	Nkx3.1CE2/+; Ptenf/f castrated-veh	4732486I23RIK	NULL	9.2623	7.01171e-05	0.000533697	NaN	0.222552	2.8689	175.937	22.1306	504.745	81.1031
479	571	Nkx3.1CE2/+; Ptenf/f castrated-veh	4833425P12RIK	NULL	9.57804	7.09799e-05	0.000538972	NaN	0.22529	2.43722	244.463	20.5807	595.81	84.9043
409	493	Nkx3.1CE2/+; Ptenf/f castrated-veh	C030013C21RIK	NULL	10.2902	7.12799e-05	0.000539958	NaN	0.226242	3.42563	411.387	42.8194	1409.26	229.501
6	9	Nkx3.1CE2/+; Ptenf/f castrated-veh	ANXA3	Mus musculus annexin A3 (Anxa3), mRNA.	92.2965	7.18036e-05	0.00054263	NaN	0.227905	12.3558	1618.67	269.795	20000	0
335	403	Nkx3.1CE2/+; Ptenf/f castrated-veh	GPR114	Mus musculus G protein-coupled receptor 114 (Gpr114), mRNA.	11.3101	7.20342e-05	0.00054308	NaN	0.228637	4.55513	147.169	11.6877	670.376	111.949
3167	25	Nkx3.1CE2/+ -veh	C1RL	Mus musculus complement component 1, r subcomponent-like (C1rl), mRNA.	-39.3716	7.22489e-05	0.000543407	NaN	0.229318	4.09522	715.898	22.8211	174.813	14.1022
448	536	Nkx3.1CE2/+; Ptenf/f castrated-veh	IER5L	Mus musculus immediate early response 5-like (Ier5l), mRNA.	9.81466	7.28279e-05	0.000546468	NaN	0.231156	2.28231	178.101	28.0036	406.482	40.9808
398	480	Nkx3.1CE2/+; Ptenf/f castrated-veh	KLF3	NULL	10.4082	7.34844e-05	0.000550093	NaN	0.23324	3.24309	198.911	17.6971	645.085	101.932
527	632	Nkx3.1CE2/+; Ptenf/f castrated-veh	EIF4E3	Mus musculus eukaryotic translation initiation factor 4E member 3 (Eif4e3), mRNA.	9.12165	7.51379e-05	0.000561148	NaN	0.238488	3.03339	381.503	53.32	1157.24	193.878
3047	766	Nkx3.1CE2/+ -veh	2310045A20RIK	Mus musculus RIKEN cDNA 2310045A20 gene (2310045A20Rik), mRNA.	-8.41297	7.56362e-05	0.00056282	NaN	0.240069	2.26792	13284.5	909.105	5857.59	1746.27
3158	65	Nkx3.1CE2/+ -veh	SPCS3	Mus musculus signal peptidase complex subunit 3 homolog (S. cerevisiae) (Spcs3), mRNA.	-23.9507	7.57165e-05	0.00056282	NaN	0.240324	3.52809	4443.06	214.451	1259.34	178.128
325	393	Nkx3.1CE2/+; Ptenf/f castrated-veh	SYNPO	PREDICTED: Mus musculus synaptopodin, transcript variant 2 (Synpo), mRNA.	11.4264	7.64212e-05	0.000566731	NaN	0.242561	8.87421	451.977	59.0887	4010.94	756.561
429	513	Nkx3.1CE2/+; Ptenf/f castrated-veh	SOAT1	Mus musculus sterol O-acyltransferase 1 (Soat1), mRNA.	10.0579	7.66638e-05	0.000566857	NaN	0.243331	2.65087	187.255	14.0787	496.387	72.567
346	416	Nkx3.1CE2/+; Ptenf/f castrated-veh	IL10RB	NULL	11.1622	7.67954e-05	0.000566857	NaN	0.243749	4.35697	232.673	17.5309	1013.75	169.162
660	794	Nkx3.1CE2/+; Ptenf/f castrated-veh	PTPN12	Mus musculus protein tyrosine phosphatase, non-receptor type 12 (Ptpn12), mRNA.	8.25077	7.71499e-05	0.000568152	NaN	0.244874	2.31902	271.503	37.5286	629.621	92.0359
502	599	Nkx3.1CE2/+; Ptenf/f castrated-veh	PLAGL2	Mus musculus pleiomorphic adenoma gene-like 2 (Plagl2), mRNA.	9.37916	7.81782e-05	0.000574393	NaN	0.248138	2.69439	999.172	212.702	2692.16	323.76
361	434	Nkx3.1CE2/+; Ptenf/f castrated-veh	FOSL2	Mus musculus fos-like antigen 2 (Fosl2), mRNA.	10.9018	7.92598e-05	0.000580994	NaN	0.251571	10.6782	514.719	133.139	5496.29	1100.77
609	728	Nkx3.1CE2/+; Ptenf/f castrated-veh	HEXB	Mus musculus hexosaminidase B (Hexb), mRNA.	8.56307	8.06828e-05	0.000586869	NaN	0.256087	3.56982	1099.93	236.964	3926.57	731.889
606	725	Nkx3.1CE2/+; Ptenf/f castrated-veh	HIST1H2BE	Mus musculus histone cluster 1, H2be (Hist1h2be), mRNA.	8.61066	8.07195e-05	0.000586869	NaN	0.256204	3.0384	2630.41	681.674	7992.23	1180.62
440	526	Nkx3.1CE2/+; Ptenf/f castrated-veh	TLR6	Mus musculus toll-like receptor 6 (Tlr6), mRNA.	9.92757	8.09314e-05	0.000586869	NaN	0.256876	2.65897	144.762	11.2208	384.918	57.0761
370	447	Nkx3.1CE2/+; Ptenf/f castrated-veh	CSNK1E	Mus musculus casein kinase 1, epsilon (Csnk1e), mRNA.	10.6781	8.11492e-05	0.000586869	NaN	0.257568	5.94654	499.891	74.7474	2972.62	555.359
254	306	Nkx3.1CE2/+; Ptenf/f castrated-veh	SNRK	Mus musculus SNF related kinase (Snrk), mRNA.	12.5391	8.11794e-05	0.000586869	NaN	0.257663	2.59615	929.858	158.374	2414.05	183.783
673	808	Nkx3.1CE2/+; Ptenf/f castrated-veh	HIST1H2BF	Mus musculus histone cluster 1, H2bf (Hist1h2bf), mRNA.	8.17384	8.14015e-05	0.000586869	NaN	0.258368	2.99048	2716.52	645.815	8123.69	1337.35
506	603	Nkx3.1CE2/+; Ptenf/f castrated-veh	C030027H14RIK	NULL	9.34908	8.15334e-05	0.000586869	NaN	0.258787	5.34255	244.998	63.5713	1308.92	263.238
651	784	Nkx3.1CE2/+; Ptenf/f castrated-veh	4931406P16RIK	Mus musculus RIKEN cDNA 4931406P16 gene (4931406P16Rik), mRNA.	8.29494	8.15404e-05	0.000586869	NaN	0.258809	2.28681	624.618	99.8968	1428.38	190.241
438	523	Nkx3.1CE2/+; Ptenf/f castrated-veh	PKP3	Mus musculus plakophilin 3 (Pkp3), mRNA.	9.9445	8.24424e-05	0.000590402	NaN	0.261672	2.43538	379.78	24.9391	924.907	129.515
354	424	Nkx3.1CE2/+; Ptenf/f castrated-veh	DSCR6	Mus musculus Down syndrome critical region homolog 6 (human) (Dscr6), mRNA.	11.0211	8.26708e-05	0.000590402	NaN	0.262397	8.36128	178.815	29.9272	1495.12	289.253
350	420	Nkx3.1CE2/+; Ptenf/f castrated-veh	PLK2	Mus musculus polo-like kinase 2 (Drosophila) (Plk2), mRNA.	11.0957	8.26781e-05	0.000590402	NaN	0.26242	2.59036	177.574	5.80069	459.983	61.6388
85	107	Nkx3.1CE2/+; Ptenf/f castrated-veh	LOC100045864	PREDICTED: Mus musculus similar to HLA-G protein (LOC100045864), misc RNA.	18.5042	8.27753e-05	0.000590402	NaN	0.262729	2.71913	7222.68	975.5	19639.4	883.204
3117	334	Nkx3.1CE2/+ -veh	MYLK	Mus musculus myosin, light polypeptide kinase (Mylk), mRNA.	-12.1909	8.35496e-05	0.000593257	NaN	0.265187	6.26798	14761.7	1354.54	2355.09	1599.05
560	668	Nkx3.1CE2/+; Ptenf/f castrated-veh	OTTMUSG00000007855	Mus musculus predicted gene, OTTMUSG00000007855 (OTTMUSG00000007855), mRNA.	8.91912	8.35765e-05	0.000593257	NaN	0.265272	3.52645	332.324	59.806	1171.92	214.218
535	641	Nkx3.1CE2/+; Ptenf/f castrated-veh	PLD2	Mus musculus phospholipase D2 (Pld2), mRNA.	9.10494	8.37363e-05	0.000593257	NaN	0.265779	2.37106	226.617	39.6931	537.322	61.8837
366	441	Nkx3.1CE2/+; Ptenf/f castrated-veh	TGM2	Mus musculus transglutaminase 2, C polypeptide (Tgm2), mRNA.	10.8029	8.49652e-05	0.000600252	NaN	0.26968	6.77011	2569.62	389.106	17396.6	3311.96
329	397	Nkx3.1CE2/+; Ptenf/f castrated-veh	LOC100042514	PREDICTED: Mus musculus hypothetical protein LOC100042514 (LOC100042514), mRNA.	11.4102	8.51019e-05	0.000600252	NaN	0.270113	73.6358	249.705	192.662	18387.2	3883.84
600	718	Nkx3.1CE2/+; Ptenf/f castrated-veh	1810037I17RIK	Mus musculus RIKEN cDNA 1810037I17 gene (1810037I17Rik), mRNA.	8.62726	8.55678e-05	0.0006022	NaN	0.271592	2.27471	4689.72	769.345	10667.7	1297.73
701	840	Nkx3.1CE2/+; Ptenf/f castrated-veh	ZC3H12A	Mus musculus zinc finger CCCH type containing 12A (Zc3h12a), mRNA.	8.07098	8.61114e-05	0.000604613	NaN	0.273318	2.13639	230.252	30.4582	491.909	66.6775
394	476	Nkx3.1CE2/+; Ptenf/f castrated-veh	LOC381524	NULL	10.4294	8.62917e-05	0.000604613	NaN	0.27389	3.0076	130.897	8.85762	393.685	60.3717
615	737	Nkx3.1CE2/+; Ptenf/f castrated-veh	SNRPD1	Mus musculus small nuclear ribonucleoprotein D1 (Snrpd1), mRNA.	8.52127	8.66407e-05	0.000605722	NaN	0.274998	2.26811	997.712	106.209	2262.92	331.122
3053	735	Nkx3.1CE2/+ -veh	MPI	Mus musculus mannose phosphate isomerase (Mpi), mRNA.	-8.54355	8.6976e-05	0.000606729	NaN	0.276062	2.07879	2276.48	98.7852	1095.1	309.246
356	427	Nkx3.1CE2/+; Ptenf/f castrated-veh	SLC12A7	NULL	10.9998	8.73975e-05	0.000608332	NaN	0.2774	4.26248	169.812	11.3169	723.823	122.148
439	525	Nkx3.1CE2/+; Ptenf/f castrated-veh	LOC621823	PREDICTED: Mus musculus similar to Proteasome activator complex subunit 2 (Proteasome activator 28-beta subunit) (PA28beta) (PA28b) (Activator of multicatalytic protease subunit 2) (11S regulator complex beta subunit) (REG-beta) (LOC621823), mRNA.	9.92996	8.77235e-05	0.000609266	NaN	0.278434	3.39037	551.265	57.7266	1868.99	314.143
484	577	Nkx3.1CE2/+; Ptenf/f castrated-veh	5830411I20	NULL	9.53211	8.81345e-05	0.000610783	NaN	0.279739	5.80486	316.143	80.2615	1835.17	372.849
339	409	Nkx3.1CE2/+; Ptenf/f castrated-veh	CDKN1A	Mus musculus cyclin-dependent kinase inhibitor 1A (P21) (Cdkn1a), mRNA.	11.2634	8.86734e-05	0.000613179	NaN	0.281449	6.88671	271.186	19.6714	1867.58	345.805
574	689	Nkx3.1CE2/+; Ptenf/f castrated-veh	D5ERTD579E	Mus musculus DNA segment, Chr 5, ERATO Doi 579, expressed (D5Ertd579e), mRNA.	8.76768	9.00287e-05	0.000621198	NaN	0.285751	2.9219	323.266	45.4009	944.55	160.823
353	423	Nkx3.1CE2/+; Ptenf/f castrated-veh	2610307O08RIK	PREDICTED: Mus musculus RIKEN cDNA 2610307O08 gene, transcript variant 12 (2610307O08Rik), mRNA.	11.0295	9.05366e-05	0.000622774	NaN	0.287363	5.97168	250.584	21.5613	1496.41	274.152
351	421	Nkx3.1CE2/+; Ptenf/f castrated-veh	PTPN18	Mus musculus protein tyrosine phosphatase, non-receptor type 18 (Ptpn18), mRNA.	11.0671	9.06496e-05	0.000622774	NaN	0.287722	5.01339	365.214	23.9119	1830.96	321.808
561	670	Nkx3.1CE2/+; Ptenf/f castrated-veh	TMEM43	Mus musculus transmembrane protein 43 (Tmem43), mRNA.	8.88403	9.15459e-05	0.000626856	NaN	0.290567	2.64219	881.625	99.0436	2329.42	372.126
344	414	Nkx3.1CE2/+; Ptenf/f castrated-veh	BC042423	NULL	11.2096	9.16386e-05	0.000626856	NaN	0.290861	6.48564	166.413	10.0389	1079.3	198.539
640	768	Nkx3.1CE2/+; Ptenf/f castrated-veh	GNPTAB	Mus musculus N-acetylglucosamine-1-phosphate transferase, alpha and beta subunits (Gnptab), mRNA.	8.37944	9.23857e-05	0.000630466	NaN	0.293232	2.43077	392.514	72.8527	954.11	127.776
693	831	Nkx3.1CE2/+; Ptenf/f castrated-veh	CLIC3	Mus musculus chloride intracellular channel 3 (Clic3), mRNA.	8.10067	9.25637e-05	0.000630466	NaN	0.293797	2.50472	123.143	18.8149	308.438	49.3076
334	402	Nkx3.1CE2/+; Ptenf/f castrated-veh	LOC381140	NULL	11.3252	9.33781e-05	0.000634651	NaN	0.296382	17.6339	216.901	10.0759	3824.81	780.059
460	549	Nkx3.1CE2/+; Ptenf/f castrated-veh	LOC672274	PREDICTED: Mus musculus similar to Transcription factor SOX-4 (LOC672274), mRNA.	9.71536	9.42574e-05	0.000639259	NaN	0.299173	3.06886	122.147	11.634	374.851	61.3766
530	636	Nkx3.1CE2/+; Ptenf/f castrated-veh	TNFRSF1B	NULL	9.11878	9.46396e-05	0.000640255	NaN	0.300386	2.6596	138.227	14.1108	367.63	58.2938
340	410	Nkx3.1CE2/+; Ptenf/f castrated-veh	SCNN1A	Mus musculus sodium channel, nonvoltage-gated 1 alpha (Scnn1a), mRNA.	11.2462	9.48868e-05	0.000640255	NaN	0.301171	14.6282	205.119	15.213	3000.52	607.544
619	745	Nkx3.1CE2/+; Ptenf/f castrated-veh	BAZ1A	PREDICTED: Mus musculus bromodomain adjacent to zinc finger domain 1A (Baz1a), mRNA.	8.49243	9.50095e-05	0.000640255	NaN	0.30156	2.19815	153.267	14.9125	336.905	48.5548
357	429	Nkx3.1CE2/+; Ptenf/f castrated-veh	CDC2L6	Mus musculus cell division cycle 2-like 6 (CDK8-like) (Cdc2l6), mRNA.	10.9862	9.58784e-05	0.000644741	NaN	0.304318	2.58046	2233.99	55.1169	5764.73	782.369
555	663	Nkx3.1CE2/+; Ptenf/f castrated-veh	A330049M08RIK	NULL	8.96129	9.94771e-05	0.000666457	NaN	0.31574	3.20878	154.324	21.9093	495.191	87.8578
517	616	Nkx3.1CE2/+; Ptenf/f castrated-veh	S100A16	Mus musculus S100 calcium binding protein A16 (S100a16), mRNA.	9.2249	9.95277e-05	0.000666457	NaN	0.315901	3.80975	183.288	28.8629	698.281	129.957
359	431	Nkx3.1CE2/+; Ptenf/f castrated-veh	EDN1	Mus musculus endothelin 1 (Edn1), mRNA.	10.9849	0.000100052	0.00066783	NaN	0.317566	8.66156	190.444	19.0217	1649.54	324.221
723	871	Nkx3.1CE2/+; Ptenf/f castrated-veh	HTRA2	Mus musculus HtrA serine peptidase 2 (Htra2), nuclear gene encoding mitochondrial protein, mRNA.	7.90572	0.000100265	0.00066783	NaN	0.318242	2.42912	312.935	55.0343	760.156	114.541
462	552	Nkx3.1CE2/+; Ptenf/f castrated-veh	PRSS22	Mus musculus protease, serine, 22 (Prss22), mRNA.	9.68957	0.000100431	0.00066783	NaN	0.318768	2.49779	129.98	8.72794	324.661	47.583
634	760	Nkx3.1CE2/+; Ptenf/f castrated-veh	ICMT	Mus musculus isoprenylcysteine carboxyl methyltransferase (Icmt), mRNA.	8.41076	0.000100574	0.00066783	NaN	0.319223	2.51761	760.75	94.6894	1915.27	308.182
737	886	Nkx3.1CE2/+; Ptenf/f castrated-veh	SLCO2A1	Mus musculus solute carrier organic anion transporter family, member 2a1 (Slco2a1), mRNA.	7.85451	0.000101952	0.000675567	NaN	0.323596	3.14908	303.853	76.5249	956.859	172.312
646	778	Nkx3.1CE2/+; Ptenf/f castrated-veh	PDK1	Mus musculus pyruvate dehydrogenase kinase, isoenzyme 1 (Pdk1), nuclear gene encoding mitochondrial protein, mRNA.	8.33164	0.000102519	0.000677906	NaN	0.325395	2.71537	399.67	57.888	1085.25	184.084
738	888	Nkx3.1CE2/+; Ptenf/f castrated-veh	HOXA7	Mus musculus homeo box A7 (Hoxa7), mRNA.	7.85392	0.000102905	0.000679044	NaN	0.32662	3.23889	421.361	108.655	1364.74	250.883
197	240	Nkx3.1CE2/+; Ptenf/f castrated-veh	NFKB1	NULL	13.7182	0.000103377	0.000679982	NaN	0.32812	2.90285	811.207	155.834	2354.81	163.459
581	696	Nkx3.1CE2/+; Ptenf/f castrated-veh	GPX8	Mus musculus glutathione peroxidase 8 (putative) (Gpx8), mRNA.	8.7384	0.000103476	0.000679982	NaN	0.328431	3.09582	1109.01	161.315	3433.29	609.558
742	893	Nkx3.1CE2/+; Ptenf/f castrated-veh	HIST1H2BH	Mus musculus histone cluster 1, H2bh (Hist1h2bh), mRNA.	7.84328	0.000103752	0.000680392	NaN	0.32931	3.07008	1887.23	472.96	5793.96	1019.85
625	751	Nkx3.1CE2/+; Ptenf/f castrated-veh	LITAF	NULL	8.45756	0.000104422	0.00068115	NaN	0.331437	3.01803	2780.71	442.983	8392.26	1499.61
3060	688	Nkx3.1CE2/+ -veh	1300007L22RIK	NULL	-8.81098	0.000104473	0.00068115	NaN	0.331596	2.26613	1861.9	137.96	821.621	213.801
413	497	Nkx3.1CE2/+; Ptenf/f castrated-veh	TPM4	Mus musculus tropomyosin 4 (Tpm4), mRNA.	10.2342	0.000104585	0.00068115	NaN	0.331952	4.46054	1846.98	195.476	8238.55	1502.59
614	736	Nkx3.1CE2/+; Ptenf/f castrated-veh	SH3RF2	Mus musculus SH3 domain containing ring finger 2 (Sh3rf2), mRNA.	8.52347	0.000104726	0.00068115	NaN	0.332401	2.67067	175.295	39.0202	468.155	63.5304
730	879	Nkx3.1CE2/+; Ptenf/f castrated-veh	RNASEH2B	Mus musculus ribonuclease H2, subunit B (Rnaseh2b), mRNA.	7.87549	0.00010554	0.000685038	NaN	0.334984	2.1859	481.234	61.8316	1051.93	154.44
749	900	Nkx3.1CE2/+; Ptenf/f castrated-veh	MAP3K8	NULL	7.82665	0.000105896	0.000685944	NaN	0.336112	2.3616	241.66	37.5024	570.704	88.2655
427	511	Nkx3.1CE2/+; Ptenf/f castrated-veh	ITFG3	Mus musculus integrin alpha FG-GAP repeat containing 3 (Itfg3), mRNA.	10.064	0.000106246	0.000686242	NaN	0.337223	3.10292	655.013	46.9954	2032.45	328.385
699	838	Nkx3.1CE2/+; Ptenf/f castrated-veh	H1F0	Mus musculus H1 histone family, member 0 (H1f0), mRNA.	8.07763	0.000106374	0.000686242	NaN	0.337631	2.52813	220.068	31.7657	556.36	91.5358
753	904	Nkx3.1CE2/+; Ptenf/f castrated-veh	SORL1	Mus musculus sortilin-related receptor, LDLR class A repeats-containing (Sorl1), mRNA.	7.81828	0.000106598	0.000686289	NaN	0.338341	2.54473	2014.2	353.723	5125.6	836.228
657	791	Nkx3.1CE2/+; Ptenf/f castrated-veh	ATL2	Mus musculus atlastin GTPase 2 (Atl2), transcript variant 1, mRNA.	8.26938	0.000107712	0.000692062	NaN	0.341879	2.4523	364.626	70.7336	894.172	120.657
411	495	Nkx3.1CE2/+; Ptenf/f castrated-veh	9130227N12RIK	NULL	10.2629	0.000108539	0.000695965	NaN	0.344503	2.63528	212.34	9.85958	559.574	81.6164
392	474	Nkx3.1CE2/+; Ptenf/f castrated-veh	GPR137B-PS	Mus musculus G protein-coupled receptor 137B, pseudogene (Gpr137b-ps), non-coding RNA.	10.4457	0.000109227	0.000698026	NaN	0.346688	4.58948	170.282	14.4485	781.504	141.825
432	516	Nkx3.1CE2/+; Ptenf/f castrated-veh	SPSB1	Mus musculus splA/ryanodine receptor domain and SOCS box containing 1 (Spsb1), mRNA.	10.0087	0.0001093	0.000698026	NaN	0.346919	4.90339	228.57	30.024	1120.77	213.433
509	606	Nkx3.1CE2/+; Ptenf/f castrated-veh	LIMK2	Mus musculus LIM motif-containing protein kinase 2 (Limk2), transcript variant 1, mRNA.	9.3213	0.000109743	0.000698422	NaN	0.348325	4.14213	826.765	131.826	3424.57	655.558
605	724	Nkx3.1CE2/+; Ptenf/f castrated-veh	LOC329750	NULL	8.61675	0.000109802	0.000698422	NaN	0.348513	2.72981	2160.99	266.977	5899.09	993.063
419	503	Nkx3.1CE2/+; Ptenf/f castrated-veh	MEMO1	Mus musculus mediator of cell motility 1 (Memo1), mRNA.	10.1466	0.000110029	0.000698463	NaN	0.349231	2.98156	201.688	12.2773	601.344	94.8441
345	415	Nkx3.1CE2/+; Ptenf/f castrated-veh	RNASET2B	Mus musculus ribonuclease T2B (Rnaset2b), mRNA.	11.1905	0.000110509	0.000699354	NaN	0.350757	2.75795	6832.68	1414.19	18844.2	1699.79
477	569	Nkx3.1CE2/+; Ptenf/f castrated-veh	LARGE	Mus musculus like-glycosyltransferase (Large), mRNA.	9.59061	0.00011061	0.000699354	NaN	0.351076	2.82926	336.685	26.9608	952.568	152.396
683	819	Nkx3.1CE2/+; Ptenf/f castrated-veh	TTC19	Mus musculus tetratricopeptide repeat domain 19 (Ttc19), transcript variant 2, mRNA.	8.15301	0.000111166	0.00070147	NaN	0.352839	2.33617	287.862	51.5038	672.493	89.6234
664	798	Nkx3.1CE2/+; Ptenf/f castrated-veh	1200016E24RIK	NULL	8.21323	0.000111759	0.00070182	NaN	0.354722	3.99916	1437.17	366.525	5747.49	1173.2
415	499	Nkx3.1CE2/+; Ptenf/f castrated-veh	REEP4	Mus musculus receptor accessory protein 4 (Reep4), mRNA.	10.1792	0.000111924	0.00070182	NaN	0.355246	2.52055	341.779	14.7996	861.473	122.862
682	818	Nkx3.1CE2/+; Ptenf/f castrated-veh	SLC25A45	Mus musculus solute carrier family 25, member 45 (Slc25a45), mRNA.	8.15795	0.00011201	0.00070182	NaN	0.35552	3.90407	356.602	91.2017	1392.2	282.875
388	470	Nkx3.1CE2/+; Ptenf/f castrated-veh	2810423O19RIK	NULL	10.4937	0.000112252	0.00070182	NaN	0.356288	3.53482	701.039	37.0699	2478.05	411.318
736	885	Nkx3.1CE2/+; Ptenf/f castrated-veh	ANP32A	Mus musculus acidic (leucine-rich) nuclear phosphoprotein 32 family, member A (Anp32a), mRNA.	7.86094	0.000112327	0.00070182	NaN	0.356525	2.51236	1265.6	199.334	3179.64	525.43
368	443	Nkx3.1CE2/+; Ptenf/f castrated-veh	GCH1	Mus musculus GTP cyclohydrolase 1 (Gch1), mRNA.	10.7982	0.000112725	0.00070183	NaN	0.357788	9.91048	174.491	15.458	1729.29	351.955
630	756	Nkx3.1CE2/+; Ptenf/f castrated-veh	FOXO1	NULL	8.43412	0.00011277	0.00070183	NaN	0.357933	2.25512	309.896	52.4742	698.855	85.026
628	754	Nkx3.1CE2/+; Ptenf/f castrated-veh	2900006A08RIK	NULL	8.44474	0.00011458	0.000710633	NaN	0.363676	2.28071	350.231	60.6662	798.776	97.7259
379	460	Nkx3.1CE2/+; Ptenf/f castrated-veh	KLF5	Mus musculus Kruppel-like factor 5 (Klf5), mRNA.	10.6015	0.000114721	0.000710633	NaN	0.364125	21.9897	456.569	151.479	10039.8	2200.64
401	484	Nkx3.1CE2/+; Ptenf/f castrated-veh	PMEPA1	Mus musculus prostate transmembrane protein, androgen induced 1 (Pmepa1), mRNA.	10.3886	0.000114857	0.000710633	NaN	0.364555	6.31597	172.002	20.6499	1086.36	213.545
3171	11	Nkx3.1CE2/+ -veh	EG434396	Mus musculus predicted gene, EG434396 (EG434396), mRNA.	-138.275	0.000115192	0.00071132	NaN	0.365618	125.862	19777.6	385.185	157.137	47.5188
3145	169	Nkx3.1CE2/+ -veh	MYL9	NULL	-16.3785	0.000116366	0.000715427	NaN	0.369347	8.17728	4391.35	357.468	537.018	342
549	657	Nkx3.1CE2/+; Ptenf/f castrated-veh	TMEM77	Mus musculus transmembrane protein 77 (Tmem77), transcript variant 2, mRNA.	8.98831	0.00011653	0.000715427	NaN	0.369866	4.93805	809.19	184.156	3995.83	827.592
377	458	Nkx3.1CE2/+; Ptenf/f castrated-veh	LOC385644	NULL	10.6234	0.000116694	0.000715427	NaN	0.370386	2.72549	167.617	4.07855	456.839	66.4055
745	896	Nkx3.1CE2/+; Ptenf/f castrated-veh	MOCS2	Mus musculus molybdenum cofactor synthesis 2 (Mocs2), mRNA.	7.83532	0.000117285	0.000715427	NaN	0.372264	2.26641	1255.92	209.319	2846.44	399.5
7	10	Nkx3.1CE2/+; Ptenf/f castrated-veh	WFDC2	Mus musculus WAP four-disulfide core domain 2 (Wfdc2), mRNA.	74.7611	0.000117369	0.000715427	NaN	0.372529	34.0369	587.598	364.296	20000	0
402	485	Nkx3.1CE2/+; Ptenf/f castrated-veh	GDE1	Mus musculus glycerophosphodiester phosphodiesterase 1 (Gde1), mRNA.	10.3499	0.00011737	0.000715427	NaN	0.372533	11.2903	422.295	93.3561	4767.86	1016.08
406	490	Nkx3.1CE2/+; Ptenf/f castrated-veh	CARD10	Mus musculus caspase recruitment domain family, member 10 (Card10), mRNA.	10.3221	0.000117435	0.000715427	NaN	0.372738	4.75845	438.18	37.8955	2085.06	386.682
387	469	Nkx3.1CE2/+; Ptenf/f castrated-veh	TNIP1	Mus musculus TNFAIP3 interacting protein 1 (Tnip1), mRNA.	10.4976	0.000118392	0.00071874	NaN	0.375775	3.73982	667.419	32.2198	2496.03	424.225
769	921	Nkx3.1CE2/+; Ptenf/f castrated-veh	HIST1H2BM	Mus musculus histone cluster 1, H2bm (Hist1h2bm), mRNA.	7.72726	0.000118431	0.00071874	NaN	0.375901	2.8202	916.732	184.457	2585.36	459.776
765	917	Nkx3.1CE2/+; Ptenf/f castrated-veh	TMEM54	Mus musculus transmembrane protein 54 (Tmem54), mRNA.	7.74041	0.000119151	0.000721396	NaN	0.378184	2.21629	409.07	64.7303	906.618	127.631
372	451	Nkx3.1CE2/+; Ptenf/f castrated-veh	PPP1R1B	Mus musculus protein phosphatase 1, regulatory (inhibitor) subunit 1B (Ppp1r1b), mRNA.	10.6577	0.000119324	0.000721396	NaN	0.378733	41.1982	300.708	124.868	12388.6	2769.65
529	635	Nkx3.1CE2/+; Ptenf/f castrated-veh	NPAL1	Mus musculus NIPA-like domain containing 1 (Npal1), mRNA.	9.11984	0.000120405	0.000726187	NaN	0.382166	2.315	126.924	8.87699	293.829	43.0309
789	942	Nkx3.1CE2/+; Ptenf/f castrated-veh	DUSP16	Mus musculus dual specificity phosphatase 16 (Dusp16), transcript variant A1, mRNA.	7.65076	0.000120786	0.000726187	NaN	0.383374	3.27897	1395.42	380.223	4575.53	863.932
385	467	Nkx3.1CE2/+; Ptenf/f castrated-veh	MCM4	Mus musculus minichromosome maintenance deficient 4 homolog (S. cerevisiae) (Mcm4), mRNA.	10.5087	0.000120843	0.000726187	NaN	0.383555	2.87065	650.001	19.0285	1865.93	282.001
662	796	Nkx3.1CE2/+; Ptenf/f castrated-veh	CYP4F16	Mus musculus cytochrome P450, family 4, subfamily f, polypeptide 16 (Cyp4f16), mRNA.	8.24448	0.000121031	0.000726187	NaN	0.384153	2.51907	323.128	39.7815	813.981	134.5
734	883	Nkx3.1CE2/+; Ptenf/f castrated-veh	ZBTB39	Mus musculus zinc finger and BTB domain containing 39 (Zbtb39), mRNA.	7.86346	0.000122059	0.000729266	NaN	0.387416	3.01547	452.397	89.5313	1364.19	253.906
571	684	Nkx3.1CE2/+; Ptenf/f castrated-veh	TAGLN2	Mus musculus transgelin 2 (Tagln2), mRNA.	8.81597	0.000122116	0.000729266	NaN	0.387597	3.61094	1943.21	310.743	7016.81	1338.75
3058	714	Nkx3.1CE2/+ -veh	PDLIM3	Mus musculus PDZ and LIM domain 3 (Pdlim3), mRNA.	-8.73111	0.000122234	0.000729266	NaN	0.38797	3.86455	2885.4	290.641	746.633	442.322
597	713	Nkx3.1CE2/+; Ptenf/f castrated-veh	SAP30	Mus musculus sin3 associated polypeptide (Sap30), mRNA.	8.66725	0.000124224	0.000739211	NaN	0.394286	2.46389	795.494	158.559	1960.01	240.21
624	750	Nkx3.1CE2/+; Ptenf/f castrated-veh	WSB1	Mus musculus WD repeat and SOCS box-containing 1 (Wsb1), transcript variant 2, mRNA.	8.45766	0.000124366	0.000739211	NaN	0.394739	2.33594	769.712	74.0303	1798	278.589
741	892	Nkx3.1CE2/+; Ptenf/f castrated-veh	ADAR	Mus musculus adenosine deaminase, RNA-specific (Adar), transcript variant 1, mRNA.	7.84628	0.00012499	0.000741531	NaN	0.396719	3.35145	577.205	133.187	1934.47	379.377
644	775	Nkx3.1CE2/+; Ptenf/f castrated-veh	DTX3L	Mus musculus deltex 3-like (Drosophila) (Dtx3l), mRNA.	8.35602	0.000125996	0.000743386	NaN	0.399911	5.42299	671.652	223.382	3642.36	811.214
548	656	Nkx3.1CE2/+; Ptenf/f castrated-veh	GLS	PREDICTED: Mus musculus glutaminase, transcript variant 3 (Gls), mRNA.	8.99678	0.000126044	0.000743386	NaN	0.400064	2.63197	275.845	24.6396	726.016	117.387
698	837	Nkx3.1CE2/+; Ptenf/f castrated-veh	PEX11A	NULL	8.07867	0.000126228	0.000743386	NaN	0.400647	2.48829	232.681	29.7388	578.977	96.0899
374	455	Nkx3.1CE2/+; Ptenf/f castrated-veh	LY6D	Mus musculus lymphocyte antigen 6 complex, locus D (Ly6d), mRNA.	10.6413	0.00012624	0.000743386	NaN	0.400685	92.3011	184.303	3.95626	17011.4	3869.89
472	564	Nkx3.1CE2/+; Ptenf/f castrated-veh	MYADM	Mus musculus myeloid-associated differentiation marker (Myadm), mRNA.	9.62806	0.000126895	0.000745863	NaN	0.402766	3.60913	659.812	65.2343	2381.34	428.109
616	738	Nkx3.1CE2/+; Ptenf/f castrated-veh	RAB11FIP5	Mus musculus RAB11 family interacting protein 5 (class I) (Rab11fip5), transcript variant 1, mRNA.	8.5188	0.000127826	0.000748568	NaN	0.405721	2.53739	752.878	79.8472	1910.34	312.973
383	465	Nkx3.1CE2/+; Ptenf/f castrated-veh	1200002N14RIK	Mus musculus RIKEN cDNA 1200002N14 gene (1200002N14Rik), mRNA.	10.5465	0.000127827	0.000748568	NaN	0.405724	16.7563	185.077	24.416	3101.2	675.812
474	566	Nkx3.1CE2/+; Ptenf/f castrated-veh	1810011O10RIK	Mus musculus RIKEN cDNA 1810011O10 gene (1810011O10Rik), mRNA.	9.61494	0.000128403	0.000750557	NaN	0.407552	4.11308	286.011	33.5405	1176.39	221.718
433	518	Nkx3.1CE2/+; Ptenf/f castrated-veh	OTTMUSG00000000971	Mus musculus predicted gene, OTTMUSG00000000971 (OTTMUSG00000000971), mRNA.	9.99032	0.000128873	0.000751918	NaN	0.409044	5.86789	224.402	29.7427	1316.77	264.011
710	852	Nkx3.1CE2/+; Ptenf/f castrated-veh	JDP2	Mus musculus Jun dimerization protein 2 (Jdp2), mRNA.	8.0297	0.000129362	0.000753387	NaN	0.410596	2.70833	298.814	70.3006	809.286	119.847
508	605	Nkx3.1CE2/+; Ptenf/f castrated-veh	TSPAN8	Mus musculus tetraspanin 8 (Tspan8), mRNA.	9.33649	0.000131044	0.000761785	NaN	0.415935	8.35204	1529.4	496.968	12773.6	2864.33
386	468	Nkx3.1CE2/+; Ptenf/f castrated-veh	ZFP185	Mus musculus zinc finger protein 185 (Zfp185), mRNA.	10.4981	0.000131806	0.00076481	NaN	0.418351	2.70977	384.958	4.64898	1043.15	153.278
452	540	Nkx3.1CE2/+; Ptenf/f castrated-veh	IRF5	Mus musculus interferon regulatory factor 5 (Irf5), mRNA.	9.77036	0.000132787	0.000769096	NaN	0.421464	2.63565	137.85	7.2003	363.323	55.5301
799	954	Nkx3.1CE2/+; Ptenf/f castrated-veh	CISH	Mus musculus cytokine inducible SH2-containing protein (Cish), mRNA.	7.61022	0.000138845	0.000800701	NaN	0.440695	3.51058	574.107	194.3	2015.45	373.671
467	559	Nkx3.1CE2/+; Ptenf/f castrated-veh	LYZ	Mus musculus lysozyme (Lyz), mRNA.	9.65659	0.000138992	0.000800701	NaN	0.441161	5.97376	2946.39	486.712	17601	3652.06
436	521	Nkx3.1CE2/+; Ptenf/f castrated-veh	MAN2B2	Mus musculus mannosidase 2, alpha B2 (Man2b2), mRNA.	9.95585	0.000139	0.000800701	NaN	0.441186	4.2863	187.091	15.1765	801.927	149.675
725	873	Nkx3.1CE2/+; Ptenf/f castrated-veh	ATP1B3	Mus musculus ATPase, Na+/K+ transporting, beta 3 polypeptide (Atp1b3), mRNA.	7.90216	0.000139377	0.000801419	NaN	0.442383	2.45656	4116.31	835.159	10112	1434.9
435	520	Nkx3.1CE2/+; Ptenf/f castrated-veh	FRRS1	Mus musculus ferric-chelate reductase 1 (Frrs1), mRNA.	9.96016	0.000140258	0.000805026	NaN	0.44518	3.48549	228.362	13.543	795.954	138.117
591	707	Nkx3.1CE2/+; Ptenf/f castrated-veh	ECE1	Mus musculus endothelin converting enzyme 1 (Ece1), mRNA.	8.69092	0.000141228	0.000808124	NaN	0.448259	3.37584	334.013	47.4001	1127.58	213.327
536	642	Nkx3.1CE2/+; Ptenf/f castrated-veh	PLEKHF2	Mus musculus pleckstrin homology domain containing, family F (with FYVE domain) member 2 (Plekhf2), mRNA.	9.09263	0.000141307	0.000808124	NaN	0.448509	3.09774	561.582	56.129	1739.64	306.829
441	527	Nkx3.1CE2/+; Ptenf/f castrated-veh	RIN1	Mus musculus Ras and Rab interactor 1 (Rin1), mRNA.	9.9226	0.000142024	0.000810761	NaN	0.450783	3.07001	193.568	9.80689	594.255	97.8864
408	492	Nkx3.1CE2/+; Ptenf/f castrated-veh	ZFP750	Mus musculus zinc finger protein 750 (Zfp750), mRNA.	10.2979	0.000142562	0.000812374	NaN	0.452492	10.5279	195.379	17.3279	2056.92	441.646
607	726	Nkx3.1CE2/+; Ptenf/f castrated-veh	BCL11A	NULL	8.60212	0.000143192	0.000814503	NaN	0.454493	3.27243	209.457	29.4072	685.434	128.857
588	704	Nkx3.1CE2/+; Ptenf/f castrated-veh	CTDSPL	Mus musculus CTD (carboxy-terminal domain, RNA polymerase II, polypeptide A) small phosphatase-like (Ctdspl), mRNA.	8.69695	0.000143687	0.000815853	NaN	0.456062	4.08669	511.599	92.978	2090.75	424.761
784	937	Nkx3.1CE2/+; Ptenf/f castrated-veh	2310036D04RIK	NULL	7.6703	0.000143994	0.000816136	NaN	0.457036	2.89209	699.209	132.199	2022.18	378.371
740	891	Nkx3.1CE2/+; Ptenf/f castrated-veh	HES1	Mus musculus hairy and enhancer of split 1 (Drosophila) (Hes1), mRNA.	7.84919	0.000146054	0.000825447	NaN	0.463575	2.56728	1100.34	242.204	2824.88	414.902
431	515	Nkx3.1CE2/+; Ptenf/f castrated-veh	LRRC26	Mus musculus leucine rich repeat containing 26 (Lrrc26), mRNA.	10.0426	0.000146207	0.000825447	NaN	0.46406	26.323	331.894	158.339	8736.44	2037.35
771	923	Nkx3.1CE2/+; Ptenf/f castrated-veh	SETX	Mus musculus senataxin (Setx), mRNA.	7.7236	0.000146672	0.000825447	NaN	0.465536	2.3498	602.465	78.2	1415.67	232.915
490	585	Nkx3.1CE2/+; Ptenf/f castrated-veh	CYB5R3	Mus musculus cytochrome b5 reductase 3 (Cyb5r3), mRNA.	9.4659	0.00014683	0.000825447	NaN	0.466039	3.81721	2563.64	259.589	9785.95	1831.55
424	508	Nkx3.1CE2/+; Ptenf/f castrated-veh	AIF1	Mus musculus allograft inflammatory factor 1 (Aif1), mRNA.	10.097	0.000146937	0.000825447	NaN	0.466377	6.71478	183.861	17.0683	1234.58	253.606
575	690	Nkx3.1CE2/+; Ptenf/f castrated-veh	PBX1	NULL	8.76673	0.00014846	0.000829986	NaN	0.471211	4.54278	477.071	93.8623	2167.23	453.15
3034	846	Nkx3.1CE2/+ -veh	1190007F08RIK	Mus musculus RIKEN cDNA 1190007F08 gene (1190007F08Rik), mRNA. XM_921339 XM_921348 XM_921353	-8.07097	0.0001486	0.000829986	NaN	0.471657	2.16135	2790.72	119.832	1291.19	423.001
675	810	Nkx3.1CE2/+; Ptenf/f castrated-veh	1110008L16RIK	NULL	8.17253	0.000148774	0.000829986	NaN	0.472209	2.25699	647.345	61.3812	1461.05	227.897
414	498	Nkx3.1CE2/+; Ptenf/f castrated-veh	SLC40A1	Mus musculus solute carrier family 40 (iron-regulated transporter), member 1 (Slc40a1), mRNA.	10.2139	0.000148791	0.000829986	NaN	0.472262	30.2638	397.542	96.5294	12031.1	2781.08
688	825	Nkx3.1CE2/+; Ptenf/f castrated-veh	PRDX4	NULL	8.12639	0.000152854	0.000851157	NaN	0.485159	2.30158	1908.56	188.552	4392.71	699.154
446	534	Nkx3.1CE2/+; Ptenf/f castrated-veh	LOC381770	NULL	9.82083	0.000153298	0.000852133	NaN	0.486568	2.73772	167.185	6.73328	457.706	71.779
450	538	Nkx3.1CE2/+; Ptenf/f castrated-veh	ARSA	NULL	9.78275	0.000154472	0.000856907	NaN	0.490295	3.72028	238.208	15.4581	886.203	160.594
476	568	Nkx3.1CE2/+; Ptenf/f castrated-veh	FOXC1	Mus musculus forkhead box C1 (Foxc1), mRNA.	9.6032	0.000154697	0.000856907	NaN	0.491008	6.14573	159.985	24.4146	983.226	207.118
417	501	Nkx3.1CE2/+; Ptenf/f castrated-veh	VAV1	Mus musculus vav 1 oncogene (Vav1), mRNA.	10.165	0.000155557	0.000860169	NaN	0.493737	6.1001	159.887	4.99361	975.33	196.332
428	512	Nkx3.1CE2/+; Ptenf/f castrated-veh	CACNA1D	Mus musculus calcium channel, voltage-dependent, L type, alpha 1D subunit (Cacna1d), transcript variant 2, mRNA.	10.0628	0.000156046	0.000861372	NaN	0.495289	6.0646	394.57	25.1178	2392.91	485.08
617	739	Nkx3.1CE2/+; Ptenf/f castrated-veh	4732474O15RIK	PREDICTED: Mus musculus RIKEN cDNA 4732474O15 gene (4732474O15Rik), mRNA.	8.50797	0.000156403	0.000861848	NaN	0.496425	3.03266	137.368	17.123	416.592	76.5488
522	625	Nkx3.1CE2/+; Ptenf/f castrated-veh	ARF2	Mus musculus ADP-ribosylation factor 2 (Arf2), mRNA.	9.16268	0.000157356	0.000862865	NaN	0.499448	2.96156	590.365	48.1159	1748.4	301.913
764	916	Nkx3.1CE2/+; Ptenf/f castrated-veh	PER2	Mus musculus period homolog 2 (Drosophila) (Per2), mRNA.	7.75943	0.000157452	0.000862865	NaN	0.499753	4.44119	600.061	186.636	2664.98	595.351
633	759	Nkx3.1CE2/+; Ptenf/f castrated-veh	PTPLAD1	Mus musculus protein tyrosine phosphatase-like A domain containing 1 (Ptplad1), mRNA.	8.41618	0.000157502	0.000862865	NaN	0.499912	3.97343	2835.73	540.468	11267.6	2328.73
650	783	Nkx3.1CE2/+; Ptenf/f castrated-veh	IL10RA	Mus musculus interleukin 10 receptor, alpha (Il10ra), mRNA.	8.3086	0.000158003	0.000862865	NaN	0.501501	2.83671	137.674	17.1923	390.542	70.4579
632	758	Nkx3.1CE2/+; Ptenf/f castrated-veh	HIST1H2AN	Mus musculus histone cluster 1, H2an (Hist1h2an), mRNA.	8.42676	0.000158123	0.000862865	NaN	0.501882	3.38169	446.358	67.8158	1509.44	293.584
610	730	Nkx3.1CE2/+; Ptenf/f castrated-veh	CD84	NULL	8.5566	0.000158219	0.000862865	NaN	0.502187	3.13867	158.176	20.1061	496.461	92.4956
788	941	Nkx3.1CE2/+; Ptenf/f castrated-veh	PIGT	NULL	7.65489	0.000160219	0.000872273	NaN	0.508535	2.12626	580.2	62.2235	1233.65	189.65
547	655	Nkx3.1CE2/+; Ptenf/f castrated-veh	9130415E20RIK	NULL	9.00523	0.0001612	0.000873078	NaN	0.511649	3.49126	1523.28	171.188	5318.17	1003.13
803	958	Nkx3.1CE2/+; Ptenf/f castrated-veh	LOC100044968	PREDICTED: Mus musculus similar to modulator recognition factor 2 (LOC100044968), mRNA.	7.59569	0.000161359	0.000873078	NaN	0.512153	2.62784	715.216	114.206	1879.47	338.821
834	992	Nkx3.1CE2/+; Ptenf/f castrated-veh	HIST2H3C1	NULL	7.40772	0.000161424	0.000873078	NaN	0.51236	2.18814	2880.13	379.855	6302.12	995.355
752	903	Nkx3.1CE2/+; Ptenf/f castrated-veh	HIST1H2AD	Mus musculus histone cluster 1, H2ad (Hist1h2ad), mRNA.	7.8213	0.000161467	0.000873078	NaN	0.512497	2.80412	1496.68	233.523	4196.86	778.239
445	533	Nkx3.1CE2/+; Ptenf/f castrated-veh	ALDOA	Mus musculus aldolase A, fructose-bisphosphate (Aldoa), mRNA.	9.82806	0.000161862	0.000873727	NaN	0.513751	2.65784	5625.12	180.731	14950.7	2308.71
457	546	Nkx3.1CE2/+; Ptenf/f castrated-veh	PRKD2	Mus musculus protein kinase D2 (Prkd2), mRNA.	9.74485	0.000162207	0.000873852	NaN	0.514844	3.23783	744.84	37.0614	2411.67	415.398
570	683	Nkx3.1CE2/+; Ptenf/f castrated-veh	AGRN	Mus musculus agrin (Agrn), mRNA.	8.82007	0.000162688	0.000873852	NaN	0.516372	3.46896	3757.83	464.619	13035.8	2488.98
481	574	Nkx3.1CE2/+; Ptenf/f castrated-veh	CELSR2	Mus musculus cadherin, EGF LAG seven-pass G-type receptor 2 (flamingo homolog, Drosophila) (Celsr2), transcript variant 1, mRNA.	9.55028	0.000162876	0.000873852	NaN	0.516967	7.10665	222.88	37.719	1583.93	343.964
846	1007	Nkx3.1CE2/+; Ptenf/f castrated-veh	LOC209281	PREDICTED: Mus musculus similar to capping protein (actin filament) muscle Z-line, alpha 1 (LOC209281), mRNA.	7.36307	0.000162987	0.000873852	NaN	0.51732	2.422	182.724	29.7795	442.558	75.4827
587	703	Nkx3.1CE2/+; Ptenf/f castrated-veh	2610319H10RIK	NULL	8.69925	0.000163666	0.000876011	NaN	0.519474	2.52112	329.287	26.6892	830.17	135.619
531	637	Nkx3.1CE2/+; Ptenf/f castrated-veh	LOC268853	NULL	9.11747	0.000164863	0.000880166	NaN	0.523274	3.41354	160.402	15.8292	547.538	101.555
444	532	Nkx3.1CE2/+; Ptenf/f castrated-veh	TCFCP2L1	Mus musculus transcription factor CP2-like 1 (Tcfcp2l1), mRNA.	9.83413	0.000164996	0.000880166	NaN	0.523699	22.3022	461.404	168.991	10290.3	2431.94
595	711	Nkx3.1CE2/+; Ptenf/f castrated-veh	2610039C10RIK	Mus musculus RIKEN cDNA 2610039C10 gene (2610039C10Rik), mRNA.	8.68131	0.000165943	0.000883729	NaN	0.526702	2.63855	485.082	42.6757	1279.91	215.91
512	611	Nkx3.1CE2/+; Ptenf/f castrated-veh	A430073A17RIK	NULL	9.29218	0.000166859	0.000887121	NaN	0.529611	2.3755	278.312	13.4657	661.129	99.0897
676	811	Nkx3.1CE2/+; Ptenf/f castrated-veh	RNF145	Mus musculus ring finger protein 145 (Rnf145), mRNA.	8.17239	0.000167161	0.00088724	NaN	0.53057	3.20071	828.697	128.894	2652.42	515.321
744	895	Nkx3.1CE2/+; Ptenf/f castrated-veh	ETL4	Mus musculus enhancer trap locus 4 (Etl4), mRNA.	7.83546	0.000167444	0.000887255	NaN	0.531466	2.57828	1279.14	169.975	3297.99	583.412
3092	483	Nkx3.1CE2/+ -veh	TMEM39A	Mus musculus transmembrane protein 39a (Tmem39a), mRNA.	-10.5584	0.000167775	0.000887532	NaN	0.532519	2.52472	3497.18	269.337	1385.18	320.351
602	720	Nkx3.1CE2/+; Ptenf/f castrated-veh	SERINC2	Mus musculus serine incorporator 2 (Serinc2), mRNA.	8.62017	0.000169351	0.000894375	NaN	0.53752	5.76604	698.532	182.084	4027.77	909.596
3045	771	Nkx3.1CE2/+ -veh	MAPBPIP-PENDING	NULL	-8.37533	0.00017082	0.000899219	NaN	0.542183	2.06005	1781.9	57.5499	864.978	255.688
800	955	Nkx3.1CE2/+; Ptenf/f castrated-veh	ARL4C	Mus musculus ADP-ribosylation factor-like 4C (Arl4c), mRNA.	7.60777	0.000171011	0.000899219	NaN	0.54279	2.74671	523.234	86.1325	1437.17	267.764
514	613	Nkx3.1CE2/+; Ptenf/f castrated-veh	RSC1A1	Mus musculus regulatory solute carrier protein, family 1, member 1 (Rsc1a1), mRNA.	9.2648	0.000171118	0.000899219	NaN	0.543128	2.46164	277.913	14.0149	684.122	105.43
787	940	Nkx3.1CE2/+; Ptenf/f castrated-veh	CHCHD10	Mus musculus coiled-coil-helix-coiled-coil-helix domain containing 10 (Chchd10), mRNA.	7.65593	0.000171693	0.000899986	NaN	0.544952	2.62287	5461.42	808.889	14324.6	2591.75
283	341	Nkx3.1CE2/+; Ptenf/f castrated-veh	NAIP2	Mus musculus NLR family, apoptosis inhibitory protein 2 (Naip2), mRNA.	12.1031	0.0001721	0.000899986	NaN	0.546245	2.51236	166.489	28.846	418.28	30.401
453	542	Nkx3.1CE2/+; Ptenf/f castrated-veh	VNN3	Mus musculus vanin 3 (Vnn3), mRNA.	9.76723	0.000172484	0.000899986	NaN	0.547465	5.81934	138.618	11.3825	806.666	166.708
679	815	Nkx3.1CE2/+; Ptenf/f castrated-veh	HOXD12	NULL	8.1641	0.000172517	0.000899986	NaN	0.547569	2.59342	158.448	17.5348	410.922	71.5137
792	946	Nkx3.1CE2/+; Ptenf/f castrated-veh	TDRD7	Mus musculus tudor domain containing 7 (Tdrd7), mRNA.	7.64024	0.000172779	0.000899986	NaN	0.548402	2.46812	1100.71	148.413	2716.7	473.254
3012	1019	Nkx3.1CE2/+ -veh	DM15	NULL	-7.31804	0.000172965	0.000899986	NaN	0.548992	3.03765	1991.19	184.607	655.505	363.449
860	1023	Nkx3.1CE2/+; Ptenf/f castrated-veh	IQGAP1	NULL	7.3005	0.000173529	0.000900316	NaN	0.55078	2.51019	1173.87	244.632	2946.65	483.736
861	1024	Nkx3.1CE2/+; Ptenf/f castrated-veh	TTPAL	Mus musculus tocopherol (alpha) transfer protein-like (Ttpal), transcript variant 1, mRNA.	7.29671	0.000173596	0.000900316	NaN	0.550994	2.28218	284.174	41.7491	648.538	107.05
839	998	Nkx3.1CE2/+; Ptenf/f castrated-veh	RNF31	Mus musculus ring finger protein 31 (Rnf31), mRNA.	7.38767	0.000174373	0.000902281	NaN	0.553461	2.22167	438.499	57.1777	974.199	158.107
456	545	Nkx3.1CE2/+; Ptenf/f castrated-veh	TRIP6	Mus musculus thyroid hormone receptor interactor 6 (Trip6), mRNA.	9.75153	0.000174543	0.000902281	NaN	0.554001	3.81524	420.54	19.5592	1604.46	295.865
449	537	Nkx3.1CE2/+; Ptenf/f castrated-veh	PPP1R3B	NULL	9.79331	0.000176691	0.000911896	NaN	0.560816	9.92668	151.166	16.979	1500.58	335.922
872	1037	Nkx3.1CE2/+; Ptenf/f castrated-veh	C130092E12	NULL	7.22118	0.000177424	0.000914192	NaN	0.563142	2.47321	554.651	109.789	1371.77	229.587
8	12	Nkx3.1CE2/+; Ptenf/f castrated-veh	LCN2	Mus musculus lipocalin 2 (Lcn2), mRNA.	69.5879	0.000178868	0.00092014	NaN	0.567726	22.0257	908.03	442.319	20000	0
818	975	Nkx3.1CE2/+; Ptenf/f castrated-veh	NBEA	NULL	7.47658	0.000179378	0.00092127	NaN	0.569345	2.9054	170.467	31.8125	495.275	96.1062
447	535	Nkx3.1CE2/+; Ptenf/f castrated-veh	ERMP1	Mus musculus endoplasmic reticulum metallopeptidase 1 (Ermp1), mRNA.	9.8161	0.000180403	0.000924381	NaN	0.5726	7.44115	906.617	55.8697	6746.27	1454.37
501	598	Nkx3.1CE2/+; Ptenf/f castrated-veh	SGPL1	Mus musculus sphingosine phosphate lyase 1 (Sgpl1), mRNA.	9.3837	0.000180733	0.000924381	NaN	0.573647	3.0439	328.478	18.8656	999.854	173.164
520	623	Nkx3.1CE2/+; Ptenf/f castrated-veh	TGFBI	Mus musculus transforming groNkx3.1CE2/+ h factor, beta induced (Tgfbi), mRNA.	9.16897	0.000180857	0.000924381	NaN	0.57404	6.21269	442.618	80.3793	2749.85	605.34
478	570	Nkx3.1CE2/+; Ptenf/f castrated-veh	IGSF4A	NULL	9.58861	0.000181721	0.000926995	NaN	0.576782	8.58913	436.784	67.6023	3751.59	841.203
455	544	Nkx3.1CE2/+; Ptenf/f castrated-veh	E430021P16RIK	NULL	9.75924	0.000181953	0.000926995	NaN	0.577518	5.66308	194.838	11.0216	1103.38	227.385
851	1012	Nkx3.1CE2/+; Ptenf/f castrated-veh	SIPA1L3	Mus musculus signal-induced proliferation-associated 1 like 3 (Sipa1l3), mRNA.	7.32603	0.000182761	0.000929621	NaN	0.580084	2.67202	573.652	103.605	1532.81	285.246
790	944	Nkx3.1CE2/+; Ptenf/f castrated-veh	D4ERTD22E	Mus musculus DNA segment, Chr 4, ERATO Doi 22, expressed (D4Ertd22e), transcript variant 2, mRNA.	7.64963	0.000184903	0.000939013	NaN	0.586883	2.39057	2174.43	266.805	5198.12	891.514
542	648	Nkx3.1CE2/+; Ptenf/f castrated-veh	SLC15A3	Mus musculus solute carrier family 15, member 3 (Slc15a3), mRNA.	9.04807	0.000185691	0.000941506	NaN	0.589383	5.02457	138.973	20.5294	698.28	148.15
3015	1001	Nkx3.1CE2/+ -veh	SIL1	Mus musculus endoplasmic reticulum chaperone SIL1 homolog (S. cerevisiae) (Sil1), mRNA.	-7.40662	0.000186795	0.000945595	NaN	0.592888	2.01659	2126.32	109.98	1054.41	319.82
526	631	Nkx3.1CE2/+; Ptenf/f castrated-veh	SLC4A7	NULL	9.13432	0.000188225	0.000951315	NaN	0.597426	6.88819	291.098	58.4606	2005.14	452.108
475	567	Nkx3.1CE2/+; Ptenf/f castrated-veh	MOBKL2B	Mus musculus MOB1, Mps One Binder kinase activator-like 2B (yeast) (Mobkl2b), mRNA.	9.60356	0.000189306	0.00095473	NaN	0.600857	2.76266	149.086	4.19734	411.874	66.6838
493	588	Nkx3.1CE2/+; Ptenf/f castrated-veh	PLAT	Mus musculus plasminogen activator, tissue (Plat), mRNA.	9.43587	0.000189696	0.00095473	NaN	0.602096	10.5603	217.997	48.066	2302.11	536.304
465	557	Nkx3.1CE2/+; Ptenf/f castrated-veh	CLIC6	Mus musculus chloride intracellular channel 6 (Clic6), mRNA.	9.66944	0.000189803	0.00095473	NaN	0.602435	26.1354	176.642	55.1522	4616.62	1121.25
3124	303	Nkx3.1CE2/+ -veh	TPM2	Mus musculus tropomyosin 2, beta (Tpm2), mRNA.	-13.1088	0.000190491	0.000956674	NaN	0.604618	5.00548	8741.84	783.171	1746.45	789.851
3013	1016	Nkx3.1CE2/+ -veh	AI428936	Mus musculus expressed sequence AI428936 (AI428936), mRNA.	-7.36898	0.000191163	0.000958311	NaN	0.60675	2.12693	5452.3	417.459	2563.46	765.798
480	573	Nkx3.1CE2/+; Ptenf/f castrated-veh	S100A6	Mus musculus S100 calcium binding protein A6 (calcyclin) (S100a6), mRNA.	9.57801	0.000191421	0.000958311	NaN	0.607569	2.37124	3402	632.903	8066.96	788.77
666	800	Nkx3.1CE2/+; Ptenf/f castrated-veh	HIST1H2BJ	Mus musculus histone cluster 1, H2bj (Hist1h2bj), mRNA.	8.20713	0.000192093	0.000960162	NaN	0.609703	2.94832	2146.07	265.678	6327.3	1189.62
686	823	Nkx3.1CE2/+; Ptenf/f castrated-veh	TCF19	Mus musculus transcription factor 19 (Tcf19), mRNA.	8.13774	0.000197007	0.000982605	NaN	0.625301	3.0994	163.442	22.2903	506.573	98.3106
504	601	Nkx3.1CE2/+; Ptenf/f castrated-veh	PCGF6	Mus musculus polycomb group ring finger 6 (Pcgf6), mRNA.	9.37287	0.000197202	0.000982605	NaN	0.62592	2.51537	483.969	101.005	1217.36	127.632
470	562	Nkx3.1CE2/+; Ptenf/f castrated-veh	RAB32	Mus musculus RAB32, member RAS oncogene family (Rab32), mRNA.	9.63436	0.000197911	0.000983955	NaN	0.628171	9.08459	331.073	25.557	3007.66	679.418
510	608	Nkx3.1CE2/+; Ptenf/f castrated-veh	INSL6	Mus musculus insulin-like 6 (Insl6), mRNA.	9.31511	0.000198093	0.000983955	NaN	0.628747	4.09812	578.81	44.4049	2372.03	467.028
648	780	Nkx3.1CE2/+; Ptenf/f castrated-veh	CORO1C	Mus musculus coronin, actin binding protein 1C (Coro1c), mRNA.	8.31586	0.000199559	0.000989686	NaN	0.633399	2.60779	1452.56	134.666	3787.97	659.806
678	813	Nkx3.1CE2/+; Ptenf/f castrated-veh	PHF11	Mus musculus PHD finger protein 11 (Phf11), mRNA.	8.17047	0.000200181	0.000991209	NaN	0.635374	2.50589	132.046	12.5602	330.891	56.8981
491	586	Nkx3.1CE2/+; Ptenf/f castrated-veh	C1QC	Mus musculus complement component 1, q subcomponent, C chain (C1qc), mRNA.	9.45332	0.00020049	0.000991209	NaN	0.636356	7.62116	597.828	70.8325	4556.14	1019.38
635	762	Nkx3.1CE2/+; Ptenf/f castrated-veh	E330016A19RIK	Mus musculus RIKEN cDNA E330016A19 gene (E330016A19Rik), mRNA.	8.40392	0.000201238	0.000993359	NaN	0.63873	2.55149	173.911	39.3428	443.732	55.4908
543	650	Nkx3.1CE2/+; Ptenf/f castrated-veh	C430002D13RIK	NULL	9.02636	0.000201598	0.00099359	NaN	0.639872	3.0422	189.712	12.9212	577.143	103.281
573	687	Nkx3.1CE2/+; Ptenf/f castrated-veh	4930572J05RIK	Mus musculus RIKEN cDNA 4930572J05 gene (4930572J05Rik), mRNA.	8.78828	0.000205122	0.00100939	NaN	0.651057	3.55835	965.286	100.129	3434.82	672.272
903	1071	Nkx3.1CE2/+; Ptenf/f castrated-veh	PIK3AP1	Mus musculus phosphoinositide-3-kinase adaptor protein 1 (Pik3ap1), mRNA.	7.06023	0.000205443	0.0010094	NaN	0.652075	2.17606	1227.2	178.109	2670.45	432.733
797	951	Nkx3.1CE2/+; Ptenf/f castrated-veh	ARHGAP17	Mus musculus Rho GTPase activating protein 17 (Arhgap17), mRNA.	7.61564	0.000206184	0.00101118	NaN	0.654428	2.25195	1412.41	149.497	3180.67	527.755
9	14	Nkx3.1CE2/+; Ptenf/f castrated-veh	IFITM1	Mus musculus interferon induced transmembrane protein 1 (Ifitm1), mRNA.	61.4438	0.000206442	0.00101118	NaN	0.655248	4.89019	4089.82	396.006	20000	0
905	1073	Nkx3.1CE2/+; Ptenf/f castrated-veh	LOC383196	PREDICTED: Mus musculus hypothetical LOC383196 (LOC383196), mRNA.	7.05683	0.00020695	0.00101211	NaN	0.656859	4.54962	215.487	93.7901	980.385	229.936
589	705	Nkx3.1CE2/+; Ptenf/f castrated-veh	LAMB2	Mus musculus laminin, beta 2 (Lamb2), mRNA.	8.69642	0.000207965	0.00101551	NaN	0.660081	2.34992	965.309	56.6211	2268.4	358.173
883	1048	Nkx3.1CE2/+; Ptenf/f castrated-veh	2310016C08RIK	Mus musculus RIKEN cDNA 2310016C08 gene (2310016C08Rik), mRNA.	7.18402	0.000211377	0.00103041	NaN	0.670911	2.2747	437.194	60.3322	994.483	169.774
540	646	Nkx3.1CE2/+; Ptenf/f castrated-veh	MED24	Mus musculus mediator complex subunit 24 (Med24), mRNA.	9.07868	0.000211666	0.00103041	NaN	0.671827	2.78885	1318.96	69.5399	3678.39	628.87
495	590	Nkx3.1CE2/+; Ptenf/f castrated-veh	SDC1	Mus musculus syndecan 1 (Sdc1), mRNA.	9.42585	0.000213356	0.00103705	NaN	0.677193	5.75125	161.475	10.3298	928.684	198.699
659	793	Nkx3.1CE2/+; Ptenf/f castrated-veh	ANKRD10	Mus musculus ankyrin repeat domain 10 (Ankrd10), mRNA.	8.25666	0.000215439	0.00104557	NaN	0.683804	3.97879	402.324	67.7079	1600.76	341.903
498	595	Nkx3.1CE2/+; Ptenf/f castrated-veh	ZFP532	Mus musculus zinc finger protein 532 (Zfp532), mRNA.	9.40326	0.000216142	0.00104738	NaN	0.686033	5.51878	223.411	13.5923	1232.96	262.153
492	587	Nkx3.1CE2/+; Ptenf/f castrated-veh	LOC626152	PREDICTED: Mus musculus similar to epiplakin (LOC626152), misc RNA.	9.44333	0.000218562	0.0010563	NaN	0.693717	14.3647	145.467	16.5276	2089.59	503.207
488	583	Nkx3.1CE2/+; Ptenf/f castrated-veh	EPHB6	Mus musculus Eph receptor B6 (Ephb6), mRNA.	9.4762	0.000218849	0.0010563	NaN	0.694626	3.37658	135.92	1.25896	458.945	83.3837
499	596	Nkx3.1CE2/+; Ptenf/f castrated-veh	LOC100048589	PREDICTED: Mus musculus similar to CDNA sequence BC052040, transcript variant 1 (LOC100048589), mRNA.	9.39048	0.000218981	0.0010563	NaN	0.695045	4.40829	287.15	11.8804	1265.84	254.388
618	740	Nkx3.1CE2/+; Ptenf/f castrated-veh	LOC676704	PREDICTED: Mus musculus similar to downregulated in ovarian cancer 1 isoform 2 (LOC676704), mRNA.	8.49723	0.000220419	0.00106162	NaN	0.699609	2.90712	167.501	15.0392	486.946	89.4768
586	702	Nkx3.1CE2/+; Ptenf/f castrated-veh	2010111I01RIK	Mus musculus RIKEN cDNA 2010111I01 gene (2010111I01Rik), mRNA. XM_988363	8.71549	0.000223842	0.00107552	NaN	0.710474	2.64685	369.323	23.7786	977.544	167.554
608	727	Nkx3.1CE2/+; Ptenf/f castrated-veh	HAP1	Mus musculus huntingtin-associated protein 1 (Hap1), mRNA.	8.60141	0.000224238	0.00107552	NaN	0.711732	2.86355	893.28	71.592	2557.95	463.084
886	1051	Nkx3.1CE2/+; Ptenf/f castrated-veh	SMAD3	NULL	7.15899	0.000224321	0.00107552	NaN	0.711994	2.29214	1018.08	138.449	2333.59	404.543
525	630	Nkx3.1CE2/+; Ptenf/f castrated-veh	SLC16A13	Mus musculus solute carrier family 16 (monocarboxylic acid transporters), member 13 (Slc16a13), mRNA.	9.13506	0.000225094	0.0010776	NaN	0.71445	2.72164	178.3	7.11142	485.269	81.6791
920	1092	Nkx3.1CE2/+; Ptenf/f castrated-veh	IRAK2	Mus musculus interleukin-1 receptor-associated kinase 2 (Irak2), mRNA.	6.95997	0.000227448	0.00108562	NaN	0.721921	2.24086	269.344	41.1119	603.565	102.222
500	597	Nkx3.1CE2/+; Ptenf/f castrated-veh	E030040G24RIK	NULL	9.38619	0.000227453	0.00108562	NaN	0.721937	6.32638	190.962	7.05739	1208.1	265.13
885	1050	Nkx3.1CE2/+; Ptenf/f castrated-veh	L3MBTL3	Mus musculus l(3)mbt-like 3 (Drosophila) (L3mbtl3), mRNA.	7.16974	0.000229056	0.00109078	NaN	0.727024	2.9066	310.965	61.5439	903.849	182.863
887	1052	Nkx3.1CE2/+; Ptenf/f castrated-veh	IRF2	Mus musculus interferon regulatory factor 2 (Irf2), mRNA.	7.14759	0.000229416	0.00109078	NaN	0.728166	2.08102	2881.13	467.428	5995.67	835.853
451	539	Nkx3.1CE2/+; Ptenf/f castrated-veh	BID	Mus musculus BH3 interacting domain death agonist (Bid), mRNA.	9.78274	0.000229566	0.00109078	NaN	0.728643	2.24264	540.324	91.1895	1211.75	107.854
505	602	Nkx3.1CE2/+; Ptenf/f castrated-veh	EG665509	PREDICTED: Mus musculus predicted gene, EG665509 (EG665509), mRNA.	9.36866	0.000230218	0.00109224	NaN	0.73071	20.9373	195.676	24.186	4096.92	1018.97
824	982	Nkx3.1CE2/+; Ptenf/f castrated-veh	IRX5	Mus musculus Iroquois related homeobox 5 (Drosophila) (Irx5), mRNA.	7.44192	0.000230772	0.00109297	NaN	0.73247	3.53615	280.049	62.0414	990.295	216.463
516	615	Nkx3.1CE2/+; Ptenf/f castrated-veh	UCK2	Mus musculus uridine-cytidine kinase 2 (Uck2), mRNA.	9.26077	0.00023106	0.00109297	NaN	0.733385	3.30358	284.321	9.58686	939.278	172.677
258	310	Nkx3.1CE2/+; Ptenf/f castrated-veh	TMEM98	Mus musculus transmembrane protein 98 (Tmem98), mRNA.	12.4736	0.000232397	0.00109766	NaN	0.737628	3.10978	751.778	180.97	2337.87	177.49
533	639	Nkx3.1CE2/+; Ptenf/f castrated-veh	SCNN1G	Mus musculus sodium channel, nonvoltage-gated 1 gamma (Scnn1g), mRNA.	9.11375	0.00023524	0.00110944	NaN	0.74665	5.11241	142.894	12.1127	730.533	156.97
768	920	Nkx3.1CE2/+; Ptenf/f castrated-veh	IRF9	Mus musculus interferon regulatory factor 9 (Irf9), mRNA.	7.73197	0.00023638	0.00111316	NaN	0.750269	3.83628	793.474	164.26	3043.99	673.829
534	640	Nkx3.1CE2/+; Ptenf/f castrated-veh	WNT4	Mus musculus wingless-related MMTV integration site 4 (Wnt4), mRNA.	9.10912	0.000237403	0.00111479	NaN	0.753516	8.75606	206.595	31.9356	1808.96	428.29
511	610	Nkx3.1CE2/+; Ptenf/f castrated-veh	CLMN	Mus musculus calmin (Clmn), transcript variant 1, mRNA.	9.29315	0.000237429	0.00111479	NaN	0.753599	5.80972	147.419	4.17406	856.461	186.355
913	1083	Nkx3.1CE2/+; Ptenf/f castrated-veh	VPS37B	Mus musculus vacuolar protein sorting 37B (yeast) (Vps37b), mRNA.	6.99262	0.00023936	0.0011222	NaN	0.759728	2.21633	888.123	123.422	1968.37	335.667
926	1098	Nkx3.1CE2/+; Ptenf/f castrated-veh	HIST1H2AK	Mus musculus histone cluster 1, H2ak (Hist1h2ak), mRNA.	6.9447	0.000240075	0.00112389	NaN	0.761999	2.91706	417.261	94.8914	1217.18	248.126
665	799	Nkx3.1CE2/+; Ptenf/f castrated-veh	ATRN	NULL	8.20962	0.000240455	0.00112401	NaN	0.763204	3.87341	243.632	37.4113	943.687	201.967
601	719	Nkx3.1CE2/+; Ptenf/f castrated-veh	PPCS	Mus musculus phosphopantothenoylcysteine synthetase (Ppcs), mRNA.	8.62642	0.000244478	0.00114113	NaN	0.775972	2.6594	828.823	202.22	2204.17	265.896
3164	35	Nkx3.1CE2/+ -veh	A230005G17RIK	NULL	-30.1669	0.000248116	0.00115493	NaN	0.78752	4.37412	1071.68	44.9538	245.005	23.5171
729	877	Nkx3.1CE2/+; Ptenf/f castrated-veh	AGPAT2	Mus musculus 1-acylglycerol-3-phosphate O-acyltransferase 2 (lysophosphatidic acid acyltransferase, beta) (Agpat2), mRNA.	7.8766	0.00024816	0.00115493	NaN	0.78766	2.38252	288.288	60.9834	686.852	88.857
696	834	Nkx3.1CE2/+; Ptenf/f castrated-veh	SLC2A6	Mus musculus solute carrier family 2 (facilitated glucose transporter), member 6 (Slc2a6), mRNA.	8.08939	0.000249513	0.00115952	NaN	0.791956	2.56481	166.872	14.6519	427.994	76.2508
941	1116	Nkx3.1CE2/+; Ptenf/f castrated-veh	C130045I22RIK	NULL	6.87806	0.000249894	0.0011596	NaN	0.793165	2.12413	193.756	31.945	411.563	62.9395
845	1006	Nkx3.1CE2/+; Ptenf/f castrated-veh	STX1A	Mus musculus syntaxin 1A (brain) (Stx1a), mRNA.	7.36332	0.000250787	0.00116204	NaN	0.795998	2.74473	183.528	27.9722	503.735	98.8603
524	629	Nkx3.1CE2/+; Ptenf/f castrated-veh	S100A14	NULL	9.13674	0.000251905	0.00116452	NaN	0.799545	5.05288	184.436	9.07751	931.934	199.965
519	622	Nkx3.1CE2/+; Ptenf/f castrated-veh	CKMT1	NULL	9.17577	0.000252055	0.00116452	NaN	0.800024	25.1514	238.012	26.8493	5986.32	1528.84
756	908	Nkx3.1CE2/+; Ptenf/f castrated-veh	KCTD10	Mus musculus potassium channel tetramerisation domain containing 10 (Kctd10), mRNA.	7.79806	0.000258661	0.0011933	NaN	0.820991	2.38662	1184.55	108.052	2827.06	492.229
955	1130	Nkx3.1CE2/+; Ptenf/f castrated-veh	PRPF38B	Mus musculus PRP38 pre-mRNA processing factor 38 (yeast) domain containing B (Prpf38b), mRNA.	6.83588	0.000259496	0.00119542	NaN	0.823642	2.07335	273.559	43.2476	567.182	85.5438
537	643	Nkx3.1CE2/+; Ptenf/f castrated-veh	SRGN	Mus musculus serglycin (Srgn), mRNA.	9.08817	0.000259877	0.00119543	NaN	0.82485	10.3553	181.7	18.8597	1881.56	457.152
3072	620	Nkx3.1CE2/+ -veh	ALDH2	Mus musculus aldehyde dehydrogenase 2, mitochondrial (Aldh2), nuclear gene encoding mitochondrial protein, mRNA.	-9.23651	0.000262902	0.00120668	NaN	0.834452	2.20962	19053	1485.77	8622.73	1803.85
541	647	Nkx3.1CE2/+; Ptenf/f castrated-veh	CTSS	Mus musculus cathepsin S (Ctss), mRNA.	9.07489	0.000263081	0.00120668	NaN	0.835019	5.15915	172.875	7.41497	891.889	193.711
807	962	Nkx3.1CE2/+; Ptenf/f castrated-veh	CDT1	Mus musculus chromatin licensing and DNA replication factor 1 (Cdt1), mRNA.	7.55936	0.000263911	0.00120874	NaN	0.837655	2.30887	259.788	25.6555	599.815	104.023
10	16	Nkx3.1CE2/+; Ptenf/f castrated-veh	SLC12A2	Mus musculus solute carrier family 12, member 2 (Slc12a2), mRNA.	59.9919	0.000264771	0.00121093	NaN	0.840384	18.3462	1090.15	533.053	20000	0
468	560	Nkx3.1CE2/+; Ptenf/f castrated-veh	HIST1H2BN	Mus musculus histone cluster 1, H2bn (Hist1h2bn), mRNA.	9.6428	0.000265366	0.00121165	NaN	0.842271	2.924	1124.49	299.609	3288.01	348.781
546	654	Nkx3.1CE2/+; Ptenf/f castrated-veh	OSMR	Mus musculus oncostatin M receptor (Osmr), mRNA.	9.00787	0.000265693	0.00121165	NaN	0.843311	6.39642	230.76	17.5271	1476.04	337.557
592	708	Nkx3.1CE2/+; Ptenf/f castrated-veh	C730013O11RIK	NULL	8.69082	0.000266838	0.00121513	NaN	0.846945	2.63218	324.769	15.808	854.849	147.718
652	785	Nkx3.1CE2/+; Ptenf/f castrated-veh	HTATIP2	NULL	8.29037	0.000268309	0.00121957	NaN	0.851614	2.38115	1060	65.8207	2524.01	422.181
3102	433	Nkx3.1CE2/+ -veh	ANXA6	Mus musculus annexin A6 (Anxa6), mRNA.	-11.0156	0.000268582	0.00121957	NaN	0.852481	3.16796	4899.65	426.09	1546.63	447.891
816	973	Nkx3.1CE2/+; Ptenf/f castrated-veh	ABCC4	Mus musculus ATP-binding cassette, sub-family C (CFTR/MRP), member 4 (Abcc4), mRNA.	7.49921	0.000269766	0.0012232	NaN	0.856237	2.33335	1550.72	158.75	3618.36	636.103
539	645	Nkx3.1CE2/+; Ptenf/f castrated-veh	ANXA1	Mus musculus annexin A1 (Anxa1), mRNA.	9.07977	0.000270229	0.00122355	NaN	0.857708	43.4272	164.734	7.11389	7153.92	1884.36
559	667	Nkx3.1CE2/+; Ptenf/f castrated-veh	TMEM139	Mus musculus transmembrane protein 139 (Tmem139), mRNA.	8.92964	0.000271683	0.00122838	NaN	0.862322	3.26746	132.247	4.9655	432.113	81.9212
796	950	Nkx3.1CE2/+; Ptenf/f castrated-veh	LOC270186	NULL	7.61852	0.000272898	0.00123212	NaN	0.86618	3.91593	340.407	70.6051	1333.01	303.026
569	682	Nkx3.1CE2/+; Ptenf/f castrated-veh	1500005K14RIK	NULL	8.82828	0.00027394	0.00123254	NaN	0.869486	3.54537	310.588	16.9554	1101.15	217.97
642	772	Nkx3.1CE2/+; Ptenf/f castrated-veh	MDFIC	Mus musculus MyoD family inhibitor domain containing (Mdfic), mRNA.	8.36389	0.000274075	0.00123254	NaN	0.869914	3.68694	200.584	22.0841	739.543	154.624
960	1138	Nkx3.1CE2/+; Ptenf/f castrated-veh	RPS6KA4	Mus musculus ribosomal protein S6 kinase, polypeptide 4 (Rps6ka4), mRNA.	6.80373	0.000274157	0.00123254	NaN	0.870173	2.25611	562.451	84.8489	1268.95	224.141
972	1152	Nkx3.1CE2/+; Ptenf/f castrated-veh	CFI	Mus musculus complement component factor i (Cfi), mRNA.	6.7617	0.000274873	0.00123401	NaN	0.872446	2.30744	172.256	28.1849	397.469	71.1797
831	989	Nkx3.1CE2/+; Ptenf/f castrated-veh	GRN	Mus musculus granulin (Grn), mRNA.	7.42853	0.000276742	0.00124065	NaN	0.878378	2.42825	3909.15	441.942	9492.38	1730.98
544	652	Nkx3.1CE2/+; Ptenf/f castrated-veh	ANPEP	Mus musculus alanyl (membrane) aminopeptidase (Anpep), mRNA.	9.01893	0.000277608	0.0012416	NaN	0.881126	21.5044	190.835	15.1194	4103.78	1061.64
11	17	Nkx3.1CE2/+; Ptenf/f castrated-veh	CBR2	Mus musculus carbonyl reductase 2 (Cbr2), mRNA.	50.3127	0.000277737	0.0012416	NaN	0.881537	16.5493	1208.51	542.537	20000	0
563	674	Nkx3.1CE2/+; Ptenf/f castrated-veh	MEIS2	Mus musculus Meis homeobox 2 (Meis2), transcript variant 2, mRNA.	8.88035	0.000279068	0.00124505	NaN	0.885761	8.04509	870.933	103.174	7006.73	1686.01
685	822	Nkx3.1CE2/+; Ptenf/f castrated-veh	PSTPIP1	Mus musculus proline-serine-threonine phosphatase-interacting protein 1 (Pstpip1), mRNA.	8.14111	0.000279294	0.00124505	NaN	0.886479	3.59765	140.661	17.7955	506.047	106.995
545	653	Nkx3.1CE2/+; Ptenf/f castrated-veh	TLR2	Mus musculus toll-like receptor 2 (Tlr2), mRNA.	9.01214	0.000279862	0.00124584	NaN	0.888283	17.5367	202.278	1.15954	3547.3	908.487
566	677	Nkx3.1CE2/+; Ptenf/f castrated-veh	2200002D01RIK	NULL	8.84548	0.000281097	0.00124958	NaN	0.892203	5.00716	187.536	12.9121	939.02	206.904
562	673	Nkx3.1CE2/+; Ptenf/f castrated-veh	SLC34A2	Mus musculus solute carrier family 34 (sodium phosphate), member 2 (Slc34a2), mRNA.	8.88109	0.00028221	0.00125195	NaN	0.895733	8.41561	151.038	17.1684	1271.08	307.86
577	692	Nkx3.1CE2/+; Ptenf/f castrated-veh	INSL3	Mus musculus insulin-like 3 (Insl3), mRNA.	8.75912	0.000282419	0.00125195	NaN	0.896397	4.72694	142.694	11.7679	674.503	147.688
974	1154	Nkx3.1CE2/+; Ptenf/f castrated-veh	ZSWIM6	NULL	6.75977	0.000284012	0.00125726	NaN	0.901456	2.41553	309.597	53.2457	747.841	139.781
643	773	Nkx3.1CE2/+; Ptenf/f castrated-veh	MCM6	Mus musculus minichromosome maintenance deficient 6 (MIS5 homolog, S. pombe) (S. cerevisiae) (Mcm6), mRNA.	8.35871	0.000286402	0.00126607	NaN	0.909041	2.97053	204.963	15.6115	608.849	116.205
604	723	Nkx3.1CE2/+; Ptenf/f castrated-veh	KRT14	Mus musculus keratin 14 (Krt14), mRNA.	8.6185	0.000287231	0.00126797	NaN	0.911671	10.1022	1535.96	388.109	15516.5	3935.26
558	666	Nkx3.1CE2/+; Ptenf/f castrated-veh	MS4A6D	Mus musculus membrane-spanning 4-domains, subfamily A, member 6D (Ms4a6d), mRNA.	8.93339	0.000288605	0.00127206	NaN	0.916034	5.78046	208.512	6.46003	1205.29	272.987
916	1087	Nkx3.1CE2/+; Ptenf/f castrated-veh	LOC269859	PREDICTED: Mus musculus similar to protein tyrosine phosphatase 4a1 (LOC269859), mRNA.	6.98092	0.000288958	0.00127206	NaN	0.917153	2.66259	222.177	37.5995	591.566	118.146
813	968	Nkx3.1CE2/+; Ptenf/f castrated-veh	TRP53	NULL	7.51648	0.000289462	0.00127251	NaN	0.918753	2.55701	544.637	61.0671	1392.64	261.734
564	675	Nkx3.1CE2/+; Ptenf/f castrated-veh	TMSB10	Mus musculus thymosin, beta 10 (Tmsb10), mRNA.	8.87224	0.000292301	0.00128322	NaN	0.927765	6.9621	984.987	62.0774	6857.58	1617.47
950	1125	Nkx3.1CE2/+; Ptenf/f castrated-veh	JAK2	Mus musculus Janus kinase 2 (Jak2), transcript variant 2, mRNA.	6.84225	0.000293266	0.00128388	NaN	0.930825	2.2087	514.085	96.8694	1135.46	175.033
758	910	Nkx3.1CE2/+; Ptenf/f castrated-veh	LOC100046793	PREDICTED: Mus musculus similar to light chain of the monoclonal antibody MST2 (LOC100046793), mRNA.	7.78377	0.000294191	0.00128388	NaN	0.933763	8.66579	318.625	146.553	2761.13	739
568	681	Nkx3.1CE2/+; Ptenf/f castrated-veh	SCOTIN	Mus musculus scotin gene (Scotin), transcript variant 1, mRNA.	8.83084	0.000294344	0.00128388	NaN	0.934249	5.89683	2206.76	141.839	13012.9	2988.2
923	1095	Nkx3.1CE2/+; Ptenf/f castrated-veh	PVR	Mus musculus poliovirus receptor (Pvr), mRNA.	6.94941	0.000294402	0.00128388	NaN	0.934432	2.17594	163.788	30.4127	356.394	52.4195
864	1028	Nkx3.1CE2/+; Ptenf/f castrated-veh	SLC31A1	Mus musculus solute carrier family 31, member 1 (Slc31a1), mRNA.	7.26788	0.000294476	0.00128388	NaN	0.934666	2.42472	1162.54	138.185	2818.85	521.747
798	952	Nkx3.1CE2/+; Ptenf/f castrated-veh	CATNB	NULL	7.61178	0.000295171	0.00128515	NaN	0.936874	2.91092	212.736	27.4459	619.259	124.86
565	676	Nkx3.1CE2/+; Ptenf/f castrated-veh	LY86	Mus musculus lymphocyte antigen 86 (Ly86), mRNA.	8.86219	0.000297371	0.00129295	NaN	0.943855	8.41061	179.706	10.6608	1511.43	367.36
567	679	Nkx3.1CE2/+; Ptenf/f castrated-veh	DGAT2	Mus musculus diacylglycerol O-acyltransferase 2 (Dgat2), mRNA.	8.83812	0.000299904	0.00130218	NaN	0.951895	18.6537	177.887	29.2275	3318.25	868.646
638	765	Nkx3.1CE2/+; Ptenf/f castrated-veh	SLC44A1	Mus musculus solute carrier family 44, member 1 (Slc44a1), mRNA.	8.38541	0.00030046	0.00130282	NaN	0.953661	5.19335	202.233	29.1405	1050.27	243.947
869	1034	Nkx3.1CE2/+; Ptenf/f castrated-veh	RNF141	NULL	7.22605	0.00030145	0.0013037	NaN	0.956802	2.11527	322.703	57.5654	682.602	90.669
755	907	Nkx3.1CE2/+; Ptenf/f castrated-veh	5730494J16RIK	NULL	7.80617	0.000301807	0.0013037	NaN	0.957934	3.10045	234.85	28.6292	728.142	149.294
704	844	Nkx3.1CE2/+; Ptenf/f castrated-veh	IGSF9	Mus musculus immunoglobulin superfamily, member 9 (Igsf9), mRNA.	8.06095	0.000301897	0.0013037	NaN	0.958222	3.83705	513.767	69.5862	1971.35	431.743
579	694	Nkx3.1CE2/+; Ptenf/f castrated-veh	TMIE	Mus musculus transmembrane inner ear (Tmie), mRNA.	8.75133	0.00030475	0.00131255	NaN	0.967275	3.76922	130.865	5.27204	493.261	101.094
661	795	Nkx3.1CE2/+; Ptenf/f castrated-veh	9430080K19RIK	NULL	8.24692	0.000304773	0.00131255	NaN	0.967348	3.17925	747.835	64.4609	2377.56	475.166
578	693	Nkx3.1CE2/+; Ptenf/f castrated-veh	ZFP90	NULL	8.75702	0.000305296	0.00131302	NaN	0.969008	2.97638	222.192	6.21255	661.326	122.489
572	685	Nkx3.1CE2/+; Ptenf/f castrated-veh	LMNB1	Mus musculus lamin B1 (Lmnb1), mRNA.	8.80481	0.000307109	0.00131735	NaN	0.974763	4.32428	149.67	3.77193	647.212	138.138
583	699	Nkx3.1CE2/+; Ptenf/f castrated-veh	DPP7	Mus musculus dipeptidylpeptidase 7 (Dpp7), mRNA.	8.72626	0.000307133	0.00131735	NaN	0.974839	5.41267	595.812	41.2385	3224.94	735.598
620	746	Nkx3.1CE2/+; Ptenf/f castrated-veh	POLD1	Mus musculus polymerase (DNA directed), delta 1, catalytic subunit (Pold1), mRNA.	8.47677	0.000308591	0.00132182	NaN	0.979467	2.5852	430.121	19.2374	1111.95	194.77
626	752	Nkx3.1CE2/+; Ptenf/f castrated-veh	SIRPB1	Mus musculus signal-regulatory protein beta 1 (Sirpb1), transcript variant 3, mRNA.	8.45287	0.000309209	0.00132268	NaN	0.98143	2.71682	126.773	6.46094	344.419	62.3693
580	695	Nkx3.1CE2/+; Ptenf/f castrated-veh	BCL2A1B	Mus musculus B-cell leukemia/lymphoma 2 related protein A1b (Bcl2a1b), mRNA.	8.74747	0.000310691	0.00132723	NaN	0.986132	7.3162	230.688	17.7855	1687.76	407.056
966	1146	Nkx3.1CE2/+; Ptenf/f castrated-veh	CSK	Mus musculus c-src tyrosine kinase (Csk), mRNA.	6.78854	0.000311338	0.00132821	NaN	0.988187	2.40012	977.268	151.754	2345.56	444.473
672	807	Nkx3.1CE2/+; Ptenf/f castrated-veh	S100A10	Mus musculus S100 calcium binding protein A10 (calpactin) (S100a10), mRNA.	8.17853	0.000313666	0.00133634	NaN	0.995575	5.03898	471.398	77.2951	2375.36	559.272
584	700	Nkx3.1CE2/+; Ptenf/f castrated-veh	4733401I05RIK	NULL	8.72461	0.000316922	0.0013484	NaN	1	2.691	143.83	2.72689	387.046	68.1626
3027	870	Nkx3.1CE2/+ -veh	SEMA4G	Mus musculus sema domain, immunoglobulin domain (Ig), transmembrane domain (TM) and short cytoplasmic domain, (semaphorin) 4G (Sema4g), mRNA.	-7.91836	0.000318431	0.00135301	NaN	1	2.25757	595.482	52.2192	263.771	71.3795
1016	1203	Nkx3.1CE2/+; Ptenf/f castrated-veh	KLF7	NULL	6.54906	0.000318914	0.00135325	NaN	1	2.61797	809.674	185.056	2119.7	414.172
832	990	Nkx3.1CE2/+; Ptenf/f castrated-veh	MITD1	Mus musculus MIT, microtubule interacting and transport, domain containing 1 (Mitd1), mRNA. XM_978698	7.42502	0.000322256	0.00136561	NaN	1	3.68565	504.21	96.969	1858.34	424.933
689	826	Nkx3.1CE2/+; Ptenf/f castrated-veh	LOC545481	PREDICTED: Mus musculus similar to likely orthologue of H. sapiens chromosome 20 open reading frame 95 (C20orf95) (LOC545481), misc RNA.	8.1114	0.000322864	0.00136636	NaN	1	2.86396	148.704	11.4438	425.882	81.9656
810	965	Nkx3.1CE2/+; Ptenf/f castrated-veh	LOC100046817	PREDICTED: Mus musculus hypothetical protein LOC100046817 (LOC100046817), mRNA.	7.55055	0.000324506	0.00137148	NaN	1	2.60345	182.462	19.1978	475.031	90.943
721	866	Nkx3.1CE2/+; Ptenf/f castrated-veh	JUN	Mus musculus Jun oncogene (Jun), mRNA.	7.91788	0.000327039	0.00138035	NaN	1	4.38802	448.705	74.589	1968.93	457.932
603	722	Nkx3.1CE2/+; Ptenf/f castrated-veh	LOC381774	NULL	8.61874	0.000329048	0.00138698	NaN	1	19.444	285.288	76.7432	5547.14	1491.25
719	864	Nkx3.1CE2/+; Ptenf/f castrated-veh	SBK	NULL	7.92787	0.000331268	0.00139449	NaN	1	3.54747	195.346	23.8926	692.984	149.915
594	710	Nkx3.1CE2/+; Ptenf/f castrated-veh	KCNK5	Mus musculus potassium channel, subfamily K, member 5 (Kcnk5), mRNA.	8.68443	0.000332302	0.00139474	NaN	1	16.2666	168.582	12.3961	2742.25	725.452
895	1062	Nkx3.1CE2/+; Ptenf/f castrated-veh	LOC100047316	PREDICTED: Mus musculus similar to anti-MOG Z12 variable light chain (LOC100047316), mRNA.	7.11121	0.000332837	0.00139474	NaN	1	6.33249	214.709	98.2237	1359.64	368.859
674	809	Nkx3.1CE2/+; Ptenf/f castrated-veh	FCGR3	Mus musculus Fc receptor, IgG, low affinity III (Fcgr3), mRNA.	8.17309	0.000332967	0.00139474	NaN	1	6.08945	282.362	53.6202	1719.43	423.923
3166	31	Nkx3.1CE2/+ -veh	FAM115C	Mus musculus family with sequence similarity 115, member C (Fam115c), mRNA.	-37.631	0.000333085	0.00139474	NaN	1	12.0368	5279.67	259.175	438.627	117.795
653	786	Nkx3.1CE2/+; Ptenf/f castrated-veh	ARHGEF19	Mus musculus Rho guanine nucleotide exchange factor (GEF) 19 (Arhgef19), mRNA.	8.28797	0.00033356	0.00139489	NaN	1	5.55511	178.338	25.927	990.689	237.201
397	479	Nkx3.1CE2/+; Ptenf/f castrated-veh	2510002J07RIK	NULL	10.4126	0.000335528	0.00140015	NaN	1	2.24463	269.96	44.9044	605.96	47.0457
996	1180	Nkx3.1CE2/+; Ptenf/f castrated-veh	EPS8	Mus musculus epidermal groNkx3.1CE2/+ h factor receptor pathway substrate 8 (Eps8), mRNA.	6.64657	0.000336062	0.00140015	NaN	1	2.23079	388.411	55.8867	866.463	157.296
889	1055	Nkx3.1CE2/+; Ptenf/f castrated-veh	RFX2	Mus musculus regulatory factor X, 2 (influences HLA class II expression) (Rfx2), mRNA.	7.13216	0.000336141	0.00140015	NaN	1	2.7963	249.948	37.5125	698.931	144.453
621	747	Nkx3.1CE2/+; Ptenf/f castrated-veh	SH3PXD2B	Mus musculus SH3 and PX domains 2B (Sh3pxd2b), mRNA.	8.46769	0.000339056	0.00141044	NaN	1	4.665	167.066	12.752	779.362	176.011
805	960	Nkx3.1CE2/+; Ptenf/f castrated-veh	CRLF3	Mus musculus cytokine receptor-like factor 3 (Crlf3), mRNA.	7.56102	0.000339949	0.0014123	NaN	1	3.22903	337.088	46.8825	1088.47	233.96
198	242	Nkx3.1CE2/+; Ptenf/f castrated-veh	LOC624662	PREDICTED: Mus musculus similar to MGC69457 protein (LOC624662), misc RNA.	13.7121	0.000342923	0.00142137	NaN	1	2.92129	4621.99	959.978	13502.2	819.214
709	851	Nkx3.1CE2/+; Ptenf/f castrated-veh	MGST3	Mus musculus microsomal glutathione S-transferase 3 (Mgst3), mRNA.	8.02992	0.000343027	0.00142137	NaN	1	3.09518	1898.44	165.98	5876	1190.36
983	1164	Nkx3.1CE2/+; Ptenf/f castrated-veh	TUSC1	Mus musculus tumor suppressor candidate 1 (Tusc1), mRNA.	6.71591	0.000343683	0.00142223	NaN	1	2.3713	394.142	58.665	934.629	178.351
658	792	Nkx3.1CE2/+; Ptenf/f castrated-veh	COQ7	Mus musculus demethyl-Q 7 (Coq7), mRNA.	8.26784	0.000344541	0.00142392	NaN	1	3.23054	212.681	14.4768	687.076	139.022
979	1160	Nkx3.1CE2/+; Ptenf/f castrated-veh	TPBG	Mus musculus trophoblast glycoprotein (Tpbg), mRNA.	6.74421	0.000346911	0.00143045	NaN	1	2.37487	734.093	163.688	1743.38	283.803
582	697	Nkx3.1CE2/+; Ptenf/f castrated-veh	POLS	Mus musculus polymerase (DNA directed) sigma (Pols), mRNA.	8.72742	0.000347021	0.00143045	NaN	1	2.26898	449.397	85.9269	1019.67	103.861
3043	777	Nkx3.1CE2/+ -veh	OAT	Mus musculus ornithine aminotransferase (Oat), mRNA.	-8.36338	0.000347599	0.00143097	NaN	1	2.40321	9521.47	859.91	3961.98	1086.4
645	776	Nkx3.1CE2/+; Ptenf/f castrated-veh	BACE2	Mus musculus beta-site APP-cleaving enzyme 2 (Bace2), mRNA.	8.33548	0.000350279	0.00144014	NaN	1	13.9026	477.49	152.038	6638.32	1793.15
714	857	Nkx3.1CE2/+; Ptenf/f castrated-veh	EDG5	Mus musculus endothelial differentiation, sphingolipid G-protein-coupled receptor, 5 (Edg5), mRNA.	8.00329	0.000355345	0.00145908	NaN	1	5.50633	279.415	50.6227	1538.55	378.11
1011	1198	Nkx3.1CE2/+; Ptenf/f castrated-veh	TLR13	Mus musculus toll-like receptor 13 (Tlr13), mRNA.	6.58538	0.00035753	0.00146615	NaN	1	2.37314	155.454	34.2029	368.915	62.893
975	1155	Nkx3.1CE2/+; Ptenf/f castrated-veh	OXR1	Mus musculus oxidation resistance 1 (Oxr1), transcript variant 1, mRNA.	6.75907	0.0003595	0.00146808	NaN	1	2.34015	820.68	113.641	1920.52	364.699
934	1108	Nkx3.1CE2/+; Ptenf/f castrated-veh	ADD3	Mus musculus adducin 3 (gamma) (Add3), mRNA.	6.90636	0.000359504	0.00146808	NaN	1	3.29774	1648.79	353.9	5437.3	1246.3
754	906	Nkx3.1CE2/+; Ptenf/f castrated-veh	RAI14	Mus musculus retinoic acid induced 14 (Rai14), mRNA.	7.81138	0.000359761	0.00146808	NaN	1	3.81411	259.14	35.1436	988.386	223.004
629	755	Nkx3.1CE2/+; Ptenf/f castrated-veh	BC014795	NULL	8.44216	0.000359851	0.00146808	NaN	1	4.62212	480.038	27.967	2218.79	502.791
844	1004	Nkx3.1CE2/+; Ptenf/f castrated-veh	4632417K18RIK	Mus musculus RIKEN cDNA 4632417K18 gene (4632417K18Rik), mRNA.	7.36603	0.000361517	0.0014705	NaN	1	2.58549	144.731	15.629	374.199	72.9335
2982	1240	Nkx3.1CE2/+ -veh	HMGCS2	Mus musculus 3-hydroxy-3-methylglutaryl-Coenzyme A synthase 2 (Hmgcs2), nuclear gene encoding mitochondrial protein, mRNA.	-6.44648	0.000361878	0.0014705	NaN	1	2.78891	1316.39	125.047	472.008	269.238
639	767	Nkx3.1CE2/+; Ptenf/f castrated-veh	LYSMD2	Mus musculus LysM, putative peptidoglycan-binding, domain containing 2 (Lysmd2), mRNA.	8.38082	0.000362061	0.0014705	NaN	1	3.57806	160.513	8.10464	574.327	120.336
873	1038	Nkx3.1CE2/+; Ptenf/f castrated-veh	SCD2	Mus musculus stearoyl-Coenzyme A desaturase 2 (Scd2), mRNA.	7.21488	0.000362298	0.0014705	NaN	1	2.17187	551.167	48.8462	1197.06	207.919
105	130	Nkx3.1CE2/+; Ptenf/f castrated-veh	EFNB1	Mus musculus ephrin B1 (Efnb1), mRNA.	17.1395	0.000364028	0.00147564	NaN	1	2.51681	387.6	52.8769	975.517	38.055
822	980	Nkx3.1CE2/+; Ptenf/f castrated-veh	PIK3R3	Mus musculus phosphatidylinositol 3 kinase, regulatory subunit, polypeptide 3 (p55) (Pik3r3), mRNA.	7.45526	0.000364548	0.00147586	NaN	1	3.72771	483.692	84.0331	1803.06	416.642
782	935	Nkx3.1CE2/+; Ptenf/f castrated-veh	LILRB4	Mus musculus leukocyte immunoglobulin-like receptor, subfamily B, member 4 (Lilrb4), mRNA.	7.68138	0.000366103	0.00148027	NaN	1	2.89999	128.159	12.9502	371.661	75.4333
623	749	Nkx3.1CE2/+; Ptenf/f castrated-veh	AB112350	Mus musculus cDNA sequence AB112350 (AB112350), mRNA.	8.46332	0.000369168	0.00149076	NaN	1	4.95046	146.123	5.85253	723.376	166.861
631	757	Nkx3.1CE2/+; Ptenf/f castrated-veh	CAPN13	Mus musculus calpain 13 (Capn13), mRNA.	8.43127	0.000372609	0.00150275	NaN	1	19.0603	142.378	29.8507	2713.77	745.606
842	1002	Nkx3.1CE2/+; Ptenf/f castrated-veh	A430075F05RIK	NULL	7.38182	0.000373456	0.00150425	NaN	1	2.40199	163.062	15.0946	391.675	72.7884
1042	1233	Nkx3.1CE2/+; Ptenf/f castrated-veh	RALB	Mus musculus v-ral simian leukemia viral oncogene homolog B (ras related) (Ralb), mRNA.	6.44462	0.000380293	0.00152802	NaN	1	2.1261	472.023	67.4794	1003.57	178.004
680	816	Nkx3.1CE2/+; Ptenf/f castrated-veh	MID1IP1	Mus musculus Mid1 interacting protein 1 (gastrulation specific G12-like (zebrafish)) (Mid1ip1), mRNA.	8.16136	0.00038032	0.00152802	NaN	1	2.49862	723.739	171.279	1808.35	217.309
888	1054	Nkx3.1CE2/+; Ptenf/f castrated-veh	SOX9	Mus musculus SRY-box containing gene 9 (Sox9), mRNA.	7.14669	0.000380904	0.00152843	NaN	1	3.0093	3221.46	496.551	9694.32	2104.18
656	790	Nkx3.1CE2/+; Ptenf/f castrated-veh	H2-DMB1	Mus musculus histocompatibility 2, class II, locus Mb1 (H2-DMb1), mRNA.	8.27609	0.000384577	0.00154107	NaN	1	5.00004	179.864	14.4545	899.328	211.941
801	956	Nkx3.1CE2/+; Ptenf/f castrated-veh	ANK	Mus musculus progressive ankylosis (Ank), mRNA.	7.6025	0.000385025	0.00154107	NaN	1	7.28312	338.773	114.424	2467.33	665.956
287	346	Nkx3.1CE2/+; Ptenf/f castrated-veh	LOC100047915	PREDICTED: Mus musculus similar to Memo1 protein (LOC100047915), mRNA.	11.9998	0.000388279	0.00155006	NaN	1	3.47419	273.438	81.7566	949.975	74.7023
1038	1228	Nkx3.1CE2/+; Ptenf/f castrated-veh	LDOC1L	Mus musculus leucine zipper, down-regulated in cancer 1-like (Ldoc1l), mRNA.	6.47021	0.00038833	0.00155006	NaN	1	2.30309	298.746	47.207	688.038	131.197
747	898	Nkx3.1CE2/+; Ptenf/f castrated-veh	TRPS1	NULL	7.82783	0.000389054	0.00155006	NaN	1	3.01893	1056.4	91.5169	3189.21	654.675
637	764	Nkx3.1CE2/+; Ptenf/f castrated-veh	GBP2	Mus musculus guanylate binding protein 2 (Gbp2), mRNA.	8.39622	0.000389292	0.00155006	NaN	1	13.8328	280.674	16.5367	3882.5	1049.67
636	763	Nkx3.1CE2/+; Ptenf/f castrated-veh	CBR3	Mus musculus carbonyl reductase 3 (Cbr3), mRNA.	8.40307	0.000390259	0.00155006	NaN	1	7.04661	511.197	8.8338	3602.2	900.849
649	782	Nkx3.1CE2/+; Ptenf/f castrated-veh	NRM	Mus musculus nurim (nuclear envelope membrane protein) (Nrm), mRNA.	8.31014	0.000390324	0.00155006	NaN	1	3.29232	196.876	6.85915	648.178	132.58
681	817	Nkx3.1CE2/+; Ptenf/f castrated-veh	VWA5A	Mus musculus von Willebrand factor A domain containing 5A (Vwa5a), mRNA.	8.15936	0.00039069	0.00155006	NaN	1	3.31455	702.119	41.7786	2327.21	484.152
12	18	Nkx3.1CE2/+; Ptenf/f castrated-veh	CYP2F2	Mus musculus cytochrome P450, family 2, subfamily f, polypeptide 2 (Cyp2f2), mRNA.	50.0595	0.000394809	0.00156445	NaN	1	20.142	992.952	654.331	20000	0
668	802	Nkx3.1CE2/+; Ptenf/f castrated-veh	IDH1	Mus musculus isocitrate dehydrogenase 1 (NADP+), soluble (Idh1), mRNA.	8.19536	0.000395471	0.00156512	NaN	1	6.54865	1894.38	231.979	12405.6	3122.37
726	874	Nkx3.1CE2/+; Ptenf/f castrated-veh	ABCG1	NULL	7.88976	0.000397193	0.00156855	NaN	1	3.52773	133.575	12.8272	471.218	103.077
3046	770	Nkx3.1CE2/+ -veh	ACTA2	NULL	-8.38929	0.000397326	0.00156855	NaN	1	3.1072	20000	0	6436.65	3966.8
968	1148	Nkx3.1CE2/+; Ptenf/f castrated-veh	LOC636952	PREDICTED: Mus musculus similar to HIStone family member (his-71) (LOC636952), misc RNA.	6.7757	0.000397829	0.00156858	NaN	1	3.02015	2040.02	393.626	6161.18	1380.72
13	19	Nkx3.1CE2/+; Ptenf/f castrated-veh	IFITM3	Mus musculus interferon induced transmembrane protein 3 (Ifitm3), mRNA.	47.7652	0.000398811	0.00156927	NaN	1	3.97561	5030.68	517.936	20000	0
691	829	Nkx3.1CE2/+; Ptenf/f castrated-veh	ST3GAL3	Mus musculus ST3 beta-galactoside alpha-2,3-sialyltransferase 3 (St3gal3), mRNA.	8.10711	0.000399375	0.00156927	NaN	1	2.71786	348.665	15.9614	947.624	179.487
707	849	Nkx3.1CE2/+; Ptenf/f castrated-veh	LOC100047268	PREDICTED: Mus musculus similar to Immediate early response 5-like (LOC100047268), mRNA.	8.03436	0.000399896	0.00156927	NaN	1	3.38485	174.574	12.6711	590.905	125.565
848	1009	Nkx3.1CE2/+; Ptenf/f castrated-veh	CCR5	Mus musculus chemokine (C-C motif) receptor 5 (Ccr5), mRNA.	7.34894	0.000399982	0.00156927	NaN	1	2.8473	139.167	16.3501	396.25	82.4471
785	938	Nkx3.1CE2/+; Ptenf/f castrated-veh	TRIM59	Mus musculus tripartite motif-containing 59 (Trim59), mRNA.	7.66404	0.000401673	0.00157396	NaN	1	2.50814	153.551	11.1879	385.128	72.241
677	812	Nkx3.1CE2/+; Ptenf/f castrated-veh	ZFP467	Mus musculus zinc finger protein 467 (Zfp467), transcript variant 3, mRNA.	8.17146	0.000402314	0.00157453	NaN	1	5.41837	184.566	18.0201	1000.05	243.09
654	787	Nkx3.1CE2/+; Ptenf/f castrated-veh	LOC637785	PREDICTED: Mus musculus similar to Ig heavy chain V region 3 precursor (LOC637785), mRNA.	8.28005	0.000404075	0.00157947	NaN	1	4.94681	136.062	6.52842	673.073	158.444
716	860	Nkx3.1CE2/+; Ptenf/f castrated-veh	SCARA3	Mus musculus scavenger receptor class A, member 3 (Scara3), mRNA.	7.95605	0.000406006	0.00158507	NaN	1	16.489	486.866	247.898	8027.91	2290.63
196	239	Nkx3.1CE2/+; Ptenf/f castrated-veh	HIST1H2BC	Mus musculus histone cluster 1, H2bc (Hist1h2bc), mRNA.	13.7801	0.000406626	0.00158509	NaN	1	2.99137	3853.72	833.889	11527.9	684.652
647	779	Nkx3.1CE2/+; Ptenf/f castrated-veh	SESTD1	NULL	8.33003	0.000407009	0.00158509	NaN	1	12.6093	182.158	3.36824	2296.88	621.706
766	918	Nkx3.1CE2/+; Ptenf/f castrated-veh	EIF2AK2	Mus musculus eukaryotic translation initiation factor 2-alpha kinase 2 (Eif2ak2), mRNA.	7.73775	0.000407721	0.00158591	NaN	1	5.25418	797.926	149.473	4192.45	1053.21
712	854	Nkx3.1CE2/+; Ptenf/f castrated-veh	LOC100047674	PREDICTED: Mus musculus similar to solute carrier family 35 (UDP-glucuronic acid/UDP-N-acetylgalactosamine dual transporter), member D1 (LOC100047674), mRNA.	8.02128	0.000410768	0.00159581	NaN	1	3.49974	215.335	15.4712	753.619	162.745
700	839	Nkx3.1CE2/+; Ptenf/f castrated-veh	COL17A1	Mus musculus collagen, type XVII, alpha 1 (Col17a1), mRNA.	8.07406	0.00041234	0.00159996	NaN	1	8.23516	386.725	71.56	3184.74	842.424
694	832	Nkx3.1CE2/+; Ptenf/f castrated-veh	PFKL	Mus musculus phosphofructokinase, liver, B-type (Pfkl), mRNA.	8.10028	0.000414493	0.00160635	NaN	1	4.29259	1637	127.29	7026.98	1619.86
669	803	Nkx3.1CE2/+; Ptenf/f castrated-veh	2310016C16RIK	Mus musculus RIKEN cDNA 2310016C16 gene (2310016C16Rik), mRNA.	8.19072	0.000415654	0.00160889	NaN	1	3.43533	881.352	35.1656	3027.74	639.597
776	928	Nkx3.1CE2/+; Ptenf/f castrated-veh	LRRFIP1	Mus musculus leucine rich repeat (in FLII) interacting protein 1 (Lrrfip1), mRNA.	7.70582	0.000417893	0.00161558	NaN	1	4.02213	458.955	60.9947	1845.98	432.251
695	833	Nkx3.1CE2/+; Ptenf/f castrated-veh	ENO1	Mus musculus enolase 1, alpha non-neuron (Eno1), mRNA.	8.09477	0.000419009	0.00161793	NaN	1	5.94744	1869.88	208.088	11121	2781.97
667	801	Nkx3.1CE2/+; Ptenf/f castrated-veh	H2-AB1	Mus musculus histocompatibility 2, class II antigen A, beta 1 (H2-Ab1), mRNA.	8.20088	0.00042015	0.00162036	NaN	1	11.7059	1453.78	211.892	17017.8	4635.54
1034	1223	Nkx3.1CE2/+; Ptenf/f castrated-veh	D230019G01RIK	NULL	6.48355	0.000421256	0.00162265	NaN	1	2.43233	267.636	43.5975	650.981	131.016
663	797	Nkx3.1CE2/+; Ptenf/f castrated-veh	SULT1C2	NULL	8.23171	0.000424061	0.00162989	NaN	1	22.6115	140.065	19.533	3167.09	898.923
687	824	Nkx3.1CE2/+; Ptenf/f castrated-veh	SLC6A6	NULL	8.13185	0.000424162	0.00162989	NaN	1	6.29572	1126.09	109.314	7089.53	1788.35
670	804	Nkx3.1CE2/+; Ptenf/f castrated-veh	SLC5A9	Mus musculus solute carrier family 5 (sodium/glucose cotransporter), member 9 (Slc5a9), mRNA.	8.1901	0.000427502	0.00164074	NaN	1	3.88027	150.32	5.28711	583.284	129.265
671	806	Nkx3.1CE2/+; Ptenf/f castrated-veh	BCL2A1D	NULL	8.1841	0.000435256	0.00166657	NaN	1	8.39747	204.695	12.3302	1718.92	452.537
948	1123	Nkx3.1CE2/+; Ptenf/f castrated-veh	RAPGEF6	Mus musculus Rap guanine nucleotide exchange factor (GEF) 6 (Rapgef6), mRNA. XM_899825 XM_899831 XM_899833 XM_899839 XM_899844 XM_899852 XM_899857 XM_899864 XM_899870 XM_914359 XM_923133 XM_923142 XM_923148 XM_923153 XM_923157 XM_923164 XM_923169 XM_923176 XM_923184 XM_923193 XM_923207	6.85181	0.000435282	0.00166657	NaN	1	2.68136	202.335	29.0765	542.533	114.383
708	850	Nkx3.1CE2/+; Ptenf/f castrated-veh	TLE6	Mus musculus transducin-like enhancer of split 6, homolog of Drosophila E(spl) (Tle6), mRNA.	8.0303	0.000437653	0.00167219	NaN	1	2.72539	298.872	11.4417	814.544	156.381
904	1072	Nkx3.1CE2/+; Ptenf/f castrated-veh	TMC4	Mus musculus transmembrane channel-like gene family 4 (Tmc4), mRNA.	7.05823	0.000437805	0.00167219	NaN	1	2.53796	1812.57	204.999	4600.24	922.684
781	934	Nkx3.1CE2/+; Ptenf/f castrated-veh	PPL	Mus musculus periplakin (Ppl), mRNA.	7.68382	0.00043885	0.00167322	NaN	1	6.12875	438.701	93.534	2688.69	704.444
3097	448	Nkx3.1CE2/+ -veh	9530002B09RIK	Mus musculus RIKEN cDNA 9530002B09 gene (9530002B09Rik), mRNA.	-10.7219	0.000439127	0.00167322	NaN	1	11.7696	14514.2	1769.64	1233.2	1722.5
929	1102	Nkx3.1CE2/+; Ptenf/f castrated-veh	SH2D2A	NULL	6.92256	0.000440735	0.00167733	NaN	1	2.5446	140.179	17.4706	356.7	72.494
1101	1300	Nkx3.1CE2/+; Ptenf/f castrated-veh	SLC19A2	Mus musculus solute carrier family 19 (thiamine transporter), member 2 (Slc19a2), mRNA.	6.20161	0.000442961	0.00168378	NaN	1	2.22635	404.157	72.7743	899.794	166.333
706	847	Nkx3.1CE2/+; Ptenf/f castrated-veh	RGMA	Mus musculus RGM domain family, member A (Rgma), mRNA.	8.0402	0.000445512	0.00169061	NaN	1	4.99042	207.288	15.0636	1034.45	250.54
945	1120	Nkx3.1CE2/+; Ptenf/f castrated-veh	EG277333	Mus musculus predicted gene, EG277333 (EG277333), non-coding RNA.	6.8648	0.000445823	0.00169061	NaN	1	2.57194	242.237	31.5976	623.019	128.122
1069	1265	Nkx3.1CE2/+; Ptenf/f castrated-veh	PEA15	NULL	6.32934	0.000446873	0.00169233	NaN	1	2.71678	510.197	108.15	1386.09	302.322
697	836	Nkx3.1CE2/+; Ptenf/f castrated-veh	WNK4	Mus musculus WNK lysine deficient protein kinase 4 (Wnk4), mRNA.	8.08699	0.000447341	0.00169233	NaN	1	9.43178	368.122	45.9035	3472.05	937.633
1013	1200	Nkx3.1CE2/+; Ptenf/f castrated-veh	IBRDC3	NULL	6.55511	0.000449163	0.00169719	NaN	1	2.19766	366.018	44.7915	804.383	150.599
849	1010	Nkx3.1CE2/+; Ptenf/f castrated-veh	SQRDL	Mus musculus sulfide quinone reductase-like (yeast) (Sqrdl), mRNA.	7.34072	0.000450193	0.00169907	NaN	1	3.31911	429.614	56.7299	1425.94	322.25
692	830	Nkx3.1CE2/+; Ptenf/f castrated-veh	IFI47	Mus musculus interferon gamma inducible protein 47 (Ifi47), mRNA.	8.10079	0.000451723	0.00170281	NaN	1	8.9981	140.421	12.3157	1263.52	338.888
3038	821	Nkx3.1CE2/+ -veh	DNAJC10	Mus musculus DnaJ (Hsp40) homolog, subfamily C, member 10 (Dnajc10), mRNA.	-8.17085	0.000452504	0.00170374	NaN	1	1.94392	20000	0	10288.5	2919.85
811	966	Nkx3.1CE2/+; Ptenf/f castrated-veh	ZFP518B	Mus musculus zinc finger protein 518B (Zfp518b), mRNA.	7.54877	0.00045682	0.00171795	NaN	1	3.04462	248.645	23.3072	757.032	161.599
825	983	Nkx3.1CE2/+; Ptenf/f castrated-veh	MCM5	Mus musculus minichromosome maintenance deficient 5, cell division cycle 46 (S. cerevisiae) (Mcm5), mRNA.	7.4419	0.000457362	0.00171795	NaN	1	3.33896	240.137	28.7958	801.808	180.332
808	963	Nkx3.1CE2/+; Ptenf/f castrated-veh	IGSF3	NULL	7.55138	0.000458449	0.00171957	NaN	1	4.36626	277.022	42.1069	1209.55	296.246
757	909	Nkx3.1CE2/+; Ptenf/f castrated-veh	MYCBPAP	Mus musculus Mycbp associated protein (Mycbpap), mRNA.	7.79517	0.000458878	0.00171957	NaN	1	2.68698	231.62	12.6309	622.359	121.43
690	828	Nkx3.1CE2/+; Ptenf/f castrated-veh	D17H6S56E-5	Mus musculus DNA segment, Chr 17, human D6S56E 5 (D17H6S56E-5), mRNA.	8.1102	0.000459943	0.00172153	NaN	1	37.673	200.921	33.6639	7569.27	2224.59
702	841	Nkx3.1CE2/+; Ptenf/f castrated-veh	AIM1L	PREDICTED: Mus musculus absent in melanoma 1-like, transcript variant 1 (Aim1l), mRNA.	8.06816	0.000460709	0.00172237	NaN	1	5.82738	175.922	9.61051	1025.17	257.381
728	876	Nkx3.1CE2/+; Ptenf/f castrated-veh	FCHO1	Mus musculus FCH domain only 1 (Fcho1), mRNA.	7.88412	0.000462245	0.00172608	NaN	1	4.03982	148.59	11.8627	600.277	139.276
1100	1299	Nkx3.1CE2/+; Ptenf/f castrated-veh	LOC100046298	PREDICTED: Mus musculus hypothetical protein LOC100046298 (LOC100046298), mRNA.	6.20688	0.000464347	0.00173189	NaN	1	2.31174	453.069	80.3934	1047.38	205.096
743	894	Nkx3.1CE2/+; Ptenf/f castrated-veh	LOC100044948	PREDICTED: Mus musculus similar to macrophage migration inhibitory factor (LOC100044948), mRNA.	7.83709	0.000467745	0.00174251	NaN	1	5.07464	1726.53	196.162	8761.53	2179.48
713	855	Nkx3.1CE2/+; Ptenf/f castrated-veh	SCNN1B	Mus musculus sodium channel, nonvoltage-gated 1 beta (Scnn1b), mRNA.	8.01461	0.000468556	0.00174349	NaN	1	7.81875	167.406	15.7718	1308.9	347.869
746	897	Nkx3.1CE2/+; Ptenf/f castrated-veh	ARHGAP27	Mus musculus Rho GTPase activating protein 27 (Arhgap27), transcript variant 1, mRNA.	7.82846	0.000469145	0.00174364	NaN	1	3.36122	236.621	15.6974	795.336	173.25
705	845	Nkx3.1CE2/+; Ptenf/f castrated-veh	MPEG1	NULL	8.058	0.000471316	0.00174966	NaN	1	13.2196	287.784	23.6443	3804.38	1068.07
739	890	Nkx3.1CE2/+; Ptenf/f castrated-veh	TNNI2	Mus musculus troponin I, skeletal, fast 2 (Tnni2), mRNA.	7.85139	0.000472304	0.00175097	NaN	1	5.90552	149.881	19.2892	885.127	227.681
774	926	Nkx3.1CE2/+; Ptenf/f castrated-veh	FBXL10	Mus musculus F-box and leucine-rich repeat protein 10 (Fbxl10), transcript variant 3, mRNA.	7.71109	0.000472772	0.00175097	NaN	1	2.59474	570.476	31.2612	1480.23	285.315
703	843	Nkx3.1CE2/+; Ptenf/f castrated-veh	SFTPD	Mus musculus surfactant associated protein D (Sftpd), mRNA.	8.06278	0.000473494	0.0017516	NaN	1	40.6164	118.194	6.41298	4800.61	1421.55
946	1121	Nkx3.1CE2/+; Ptenf/f castrated-veh	E230029C05RIK	PREDICTED: Mus musculus RIKEN cDNA E230029C05 gene (E230029C05Rik), mRNA.	6.8636	0.000475095	0.00175547	NaN	1	2.26272	139.985	14.0946	316.746	59.8392
732	881	Nkx3.1CE2/+; Ptenf/f castrated-veh	LASS5	NULL	7.87263	0.000475924	0.00175649	NaN	1	4.11735	479.38	35.9377	1973.78	462.088
715	858	Nkx3.1CE2/+; Ptenf/f castrated-veh	TNF	Mus musculus tumor necrosis factor (Tnf), mRNA.	7.97123	0.000476527	0.00175667	NaN	1	4.63206	133.903	6.15614	620.245	148.595
820	978	Nkx3.1CE2/+; Ptenf/f castrated-veh	HDAC7	Mus musculus histone deacetylase 7 (Hdac7), mRNA. XM_001003311 XM_001003316 XM_001004168 XM_001004172 XM_001004178 XM_001004180 XM_001004182 XM_001004187 XM_001004194 XM_001004198	7.46661	0.000479761	0.00176654	NaN	1	2.42443	447.645	29.7211	1085.28	204.797
763	915	Nkx3.1CE2/+; Ptenf/f castrated-veh	LOC100044298	PREDICTED: Mus musculus hypothetical protein LOC100044298 (LOC100044298), mRNA.	7.76677	0.000481156	0.00176963	NaN	1	5.17535	348.193	43.5024	1802.02	454.321
718	862	Nkx3.1CE2/+; Ptenf/f castrated-veh	FMNL3	Mus musculus formin-like 3 (Fmnl3), mRNA.	7.93202	0.000481989	0.00177064	NaN	1	5.11008	269.291	18.131	1376.1	340.091
901	1068	Nkx3.1CE2/+; Ptenf/f castrated-veh	HCLS1	Mus musculus hematopoietic cell specific Lyn substrate 1 (Hcls1), mRNA.	7.07403	0.000482748	0.00177138	NaN	1	2.23946	127.96	10.4855	286.562	52.7409
751	902	Nkx3.1CE2/+; Ptenf/f castrated-veh	2310047D13RIK	NULL	7.82349	0.000487512	0.00178679	NaN	1	6.37487	236.184	31.6031	1505.65	394.895
794	948	Nkx3.1CE2/+; Ptenf/f castrated-veh	BNIPL	Mus musculus BCL2/adenovirus E1B 19kD interacting protein like (Bnipl), mRNA.	7.62441	0.000490206	0.00179455	NaN	1	3.71752	202.883	19.9792	754.22	174.659
878	1043	Nkx3.1CE2/+; Ptenf/f castrated-veh	SDC3	Mus musculus syndecan 3 (Sdc3), mRNA.	7.19667	0.00049076	0.00179455	NaN	1	3.3562	464.947	64.9176	1560.45	361.182
777	930	Nkx3.1CE2/+; Ptenf/f castrated-veh	ABCC5	Mus musculus ATP-binding cassette, sub-family C (CFTR/MRP), member 5 (Abcc5), transcript variant 2, mRNA.	7.70196	0.000493825	0.00180368	NaN	1	3.96984	281.873	26.2168	1118.99	263.504
717	861	Nkx3.1CE2/+; Ptenf/f castrated-veh	UPK1A	Mus musculus uroplakin 1A (Upk1a), mRNA.	7.94916	0.000494697	0.00180479	NaN	1	12.4737	277.739	33.9531	3464.42	979.932
1035	1225	Nkx3.1CE2/+; Ptenf/f castrated-veh	LOC100044395	PREDICTED: Mus musculus similar to RNA binding protein gene with multiple splicing (LOC100044395), mRNA.	6.48122	0.000498655	0.00181714	NaN	1	2.1966	289.811	35.2694	636.599	121.151
879	1044	Nkx3.1CE2/+; Ptenf/f castrated-veh	GADD45A	Mus musculus groNkx3.1CE2/+ h arrest and DNA-damage-inducible 45 alpha (Gadd45a), mRNA.	7.19615	0.000499727	0.00181896	NaN	1	4.58647	436.322	91.2691	2001.18	516.745
772	924	Nkx3.1CE2/+; Ptenf/f castrated-veh	4930403C10RIK	NULL	7.7217	0.000501711	0.00182409	NaN	1	3.47063	142.16	10.0799	493.384	110.473
1106	1307	Nkx3.1CE2/+; Ptenf/f castrated-veh	BC017643	Mus musculus cDNA sequence BC017643 (BC017643), mRNA.	6.18206	0.000505276	0.00183495	NaN	1	2.66849	869.127	186.034	2319.26	510.681
724	872	Nkx3.1CE2/+; Ptenf/f castrated-veh	H2-T23	Mus musculus histocompatibility 2, T region locus 23 (H2-T23), mRNA.	7.90235	0.000507354	0.00183767	NaN	1	6.66065	2429.24	162.071	16180.3	4254.44
1098	1297	Nkx3.1CE2/+; Ptenf/f castrated-veh	B230342M21RIK	Mus musculus RIKEN cDNA B230342M21 gene (B230342M21Rik), mRNA.	6.20956	0.000507591	0.00183767	NaN	1	2.15113	666.456	130.576	1433.63	239.438
1061	1256	Nkx3.1CE2/+; Ptenf/f castrated-veh	BC005537	Mus musculus cDNA sequence BC005537 (BC005537), mRNA.	6.35944	0.000507762	0.00183767	NaN	1	2.01146	623.669	69.4947	1254.49	222.151
3065	671	Nkx3.1CE2/+ -veh	TSTA3	Mus musculus tissue specific transplantation antigen P35B (Tsta3), mRNA.	-8.92503	0.000508836	0.00183946	NaN	1	2.20487	11862.2	996.311	5380.01	1096.23
770	922	Nkx3.1CE2/+; Ptenf/f castrated-veh	1700052O22RIK	NULL	7.72555	0.000509459	0.00183962	NaN	1	5.54838	572.747	70.0778	3177.82	819.822
853	1014	Nkx3.1CE2/+; Ptenf/f castrated-veh	TLR4	NULL	7.31886	0.000511446	0.00184469	NaN	1	2.48648	255.922	18.9811	636.346	124.333
722	869	Nkx3.1CE2/+; Ptenf/f castrated-veh	3110001A13RIK	Mus musculus RIKEN cDNA 3110001A13 gene (3110001A13Rik), mRNA.	7.91053	0.000512945	0.001848	NaN	1	5.72204	173.518	5.43964	992.878	253.362
850	1011	Nkx3.1CE2/+; Ptenf/f castrated-veh	1700030K09RIK	Mus musculus RIKEN cDNA 1700030K09 gene (1700030K09Rik), mRNA.	7.32652	0.000513896	0.00184932	NaN	1	2.39955	310.26	21.1753	744.485	141.766
863	1027	Nkx3.1CE2/+; Ptenf/f castrated-veh	GSTP2	Mus musculus glutathione S-transferase, pi 2 (Gstp2), mRNA.	7.28195	0.000515766	0.00185395	NaN	1	3.96722	164.352	25.1519	652.023	160.09
3144	173	Nkx3.1CE2/+ -veh	LARS	Mus musculus leucyl-tRNA synthetase (Lars), mRNA. XM_901187 XM_913429 XM_922755 XM_922767 XM_922771 XM_922775 XM_922782 XM_922785 XM_989215	-15.4683	0.000517123	0.00185673	NaN	1	2.5626	9025.5	555.221	3522.02	399.61
1142	1350	Nkx3.1CE2/+; Ptenf/f castrated-veh	CDC42EP4	Mus musculus CDC42 effector protein (Rho GTPase binding) 4 (Cdc42ep4), mRNA.	6.04631	0.000518687	0.00186024	NaN	1	2.12268	1045.19	182.678	2218.61	399.036
835	993	Nkx3.1CE2/+; Ptenf/f castrated-veh	CERCAM	Mus musculus cerebral endothelial cell adhesion molecule (Cercam), mRNA.	7.39788	0.00052023	0.00186367	NaN	1	5.13422	196.183	35.8695	1007.25	263.351
735	884	Nkx3.1CE2/+; Ptenf/f castrated-veh	IGHV1S36_M13788_IG_HEAVY_VARIABLE_1S36_40	NULL	7.86285	0.000521282	0.00186533	NaN	1	3.16934	149.547	3.7069	473.965	100.921
727	875	Nkx3.1CE2/+; Ptenf/f castrated-veh	NFKBID	Mus musculus nuclear factor of kappa light polypeptide gene enhancer in B-cells inhibitor, delta (Nfkbid), mRNA.	7.88696	0.000525803	0.00187939	NaN	1	3.70878	132.026	0.514794	489.657	111.029
924	1096	Nkx3.1CE2/+; Ptenf/f castrated-veh	TSPYL3	Mus musculus TSPY-like 3 (Tspyl3), mRNA.	6.94926	0.000526546	0.00187993	NaN	1	2.588	167.239	18.2217	432.815	89.9918
1071	1268	Nkx3.1CE2/+; Ptenf/f castrated-veh	EFNA4	Mus musculus ephrin A4 (Efna4), mRNA.	6.31314	0.00052834	0.00188421	NaN	1	2.18686	191.072	25.2171	417.848	80.4277
773	925	Nkx3.1CE2/+; Ptenf/f castrated-veh	D8ERTD82E	Mus musculus DNA segment, Chr 8, ERATO Doi 82, expressed (D8Ertd82e), mRNA.	7.71836	0.000529972	0.00188681	NaN	1	3.49476	235.42	13.4154	822.737	185.341
733	882	Nkx3.1CE2/+; Ptenf/f castrated-veh	IGHV1S35_M12376_IG_HEAVY_VARIABLE_1S35_13	NULL	7.87182	0.000530257	0.00188681	NaN	1	4.90442	151.151	1.98051	741.309	183.6
1039	1230	Nkx3.1CE2/+; Ptenf/f castrated-veh	2310011G17RIK	NULL	6.45285	0.000531642	0.001888	NaN	1	2.03449	993.203	181.706	2020.66	292.006
761	913	Nkx3.1CE2/+; Ptenf/f castrated-veh	HSD11B2	Mus musculus hydroxysteroid 11-beta dehydrogenase 2 (Hsd11b2), mRNA.	7.77641	0.00053185	0.001888	NaN	1	7.6084	140.057	16.0555	1065.61	290.551
759	911	Nkx3.1CE2/+; Ptenf/f castrated-veh	NOL3	Mus musculus nucleolar protein 3 (apoptosis repressor with CARD domain) (Nol3), mRNA.	7.78322	0.000532375	0.001888	NaN	1	3.59583	208.753	9.06351	750.639	170.045
875	1040	Nkx3.1CE2/+; Ptenf/f castrated-veh	GADD45B	Mus musculus groNkx3.1CE2/+ h arrest and DNA-damage-inducible 45 beta (Gadd45b), mRNA.	7.20257	0.000534143	0.00189215	NaN	1	3.85797	183.096	27.7942	706.382	173.327
793	947	Nkx3.1CE2/+; Ptenf/f castrated-veh	KCNN4	Mus musculus potassium intermediate/small conductance calcium-activated channel, subfamily N, member 4 (Kcnn4), mRNA.	7.63294	0.000535369	0.00189438	NaN	1	3.87118	152.701	12.1438	591.135	139.51
767	919	Nkx3.1CE2/+; Ptenf/f castrated-veh	LOC100040353	PREDICTED: Mus musculus similar to splicing coactivator subunit SRm300 (LOC100040353), mRNA.	7.73431	0.000536432	0.00189603	NaN	1	4.09122	165.072	10.1641	675.348	160.894
778	931	Nkx3.1CE2/+; Ptenf/f castrated-veh	TMEM176A	Mus musculus transmembrane protein 176A (Tmem176a), mRNA.	7.69352	0.000537726	0.00189849	NaN	1	4.03791	702.853	48.272	2838.06	675.628
1157	1367	Nkx3.1CE2/+; Ptenf/f castrated-veh	C920006C10RIK	NULL	5.99895	0.000539978	0.00190432	NaN	1	2.1115	847.908	150.128	1790.35	319.97
795	949	Nkx3.1CE2/+; Ptenf/f castrated-veh	DUSP6	Mus musculus dual specificity phosphatase 6 (Dusp6), mRNA.	7.62058	0.000541408	0.0019052	NaN	1	4.17069	744.901	65.2336	3106.75	753.162
977	1157	Nkx3.1CE2/+; Ptenf/f castrated-veh	PLCG2	Mus musculus phospholipase C, gamma 2 (Plcg2), mRNA.	6.75314	0.000541619	0.0019052	NaN	1	3.80248	743.225	162.85	2826.1	719.137
748	899	Nkx3.1CE2/+; Ptenf/f castrated-veh	LOC100047934	PREDICTED: Mus musculus hypothetical protein LOC100047934 (LOC100047934), mRNA.	7.82712	0.000542054	0.0019052	NaN	1	20.3351	209.857	24.5435	4267.46	1269.23
1041	1232	Nkx3.1CE2/+; Ptenf/f castrated-veh	ALOX5AP	NULL	6.44651	0.000542817	0.0019052	NaN	1	4.21858	405.82	128.509	1711.99	461.493
814	971	Nkx3.1CE2/+; Ptenf/f castrated-veh	FPR2	Mus musculus formyl peptide receptor 2 (Fpr2), mRNA.	7.51305	0.000543229	0.0019052	NaN	1	4.42222	123.915	14.5847	547.981	136.648
815	972	Nkx3.1CE2/+; Ptenf/f castrated-veh	D230021E06RIK	NULL	7.50812	0.000549563	0.0019244	NaN	1	3.03211	311.695	21.2549	945.095	204.309
760	912	Nkx3.1CE2/+; Ptenf/f castrated-veh	EGR1	Mus musculus early groNkx3.1CE2/+ h response 1 (Egr1), mRNA.	7.77914	0.000549916	0.0019244	NaN	1	3.23447	1014.52	23.1644	3281.44	712.679
1143	1351	Nkx3.1CE2/+; Ptenf/f castrated-veh	EPHB4	Mus musculus Eph receptor B4 (Ephb4), mRNA.	6.04528	0.000551542	0.00192797	NaN	1	2.29566	791.853	140.218	1817.83	365.291
817	974	Nkx3.1CE2/+; Ptenf/f castrated-veh	MOXD1	Mus musculus monooxygenase, DBH-like 1 (Moxd1), mRNA.	7.49762	0.000562678	0.00196473	NaN	1	5.29005	269.578	37.2847	1426.08	374.054
1133	1340	Nkx3.1CE2/+; Ptenf/f castrated-veh	HIST1H2AH	Mus musculus histone cluster 1, H2ah (Hist1h2ah), mRNA.	6.07345	0.000568304	0.0019822	NaN	1	2.84013	348.975	82.9413	991.132	230.863
982	1163	Nkx3.1CE2/+; Ptenf/f castrated-veh	SFN	Mus musculus stratifin (Sfn), mRNA.	6.73052	0.000571845	0.00199235	NaN	1	3.63254	141.553	28.3194	514.195	129.453
1053	1247	Nkx3.1CE2/+; Ptenf/f castrated-veh	SLC16A11	Mus musculus solute carrier family 16 (monocarboxylic acid transporters), member 11 (Slc16a11), mRNA.	6.39948	0.00057315	0.00199471	NaN	1	2.13564	140.275	15.6853	299.577	56.7952
454	543	Nkx3.1CE2/+; Ptenf/f castrated-veh	ARL6	Mus musculus ADP-ribosylation factor-like 6 (Arl6), mRNA.	9.76435	0.00057477	0.00199743	NaN	1	2.40496	416.47	84.9708	1001.59	84.2196
783	936	Nkx3.1CE2/+; Ptenf/f castrated-veh	HAVCR2	Mus musculus hepatitis A virus cellular receptor 2 (Havcr2), mRNA.	7.67841	0.000575189	0.00199743	NaN	1	2.66727	139.79	3.31754	372.858	74.174
775	927	Nkx3.1CE2/+; Ptenf/f castrated-veh	TJP3	NULL	7.70804	0.00058324	0.00202317	NaN	1	5.79388	279.215	6.16301	1617.74	425.103
1168	1380	Nkx3.1CE2/+; Ptenf/f castrated-veh	TFRC	Mus musculus transferrin receptor (Tfrc), mRNA.	5.94594	0.000584809	0.0020264	NaN	1	2.47864	989.407	213.417	2452.38	521.566
935	1110	Nkx3.1CE2/+; Ptenf/f castrated-veh	1600029O10RIK	NULL	6.903	0.000585995	0.0020283	NaN	1	3.61387	160.078	26.8666	578.503	143.457
809	964	Nkx3.1CE2/+; Ptenf/f castrated-veh	MTAP7D1	Mus musculus microtubule-associated protein 7 domain containing 1 (Mtap7d1), mRNA.	7.55085	0.00058812	0.00203344	NaN	1	2.95557	1059.6	48.8866	3131.72	668.582
840	999	Nkx3.1CE2/+; Ptenf/f castrated-veh	PHLDA3	Mus musculus pleckstrin homology-like domain, family A, member 3 (Phlda3), mRNA.	7.38463	0.000588774	0.00203348	NaN	1	2.56385	349.048	19.2556	894.905	178.926
786	939	Nkx3.1CE2/+; Ptenf/f castrated-veh	S100A1	Mus musculus S100 calcium binding protein A1 (S100a1), mRNA.	7.66339	0.00059031	0.00203657	NaN	1	13.0457	796.816	103.31	10395	3064.19
852	1013	Nkx3.1CE2/+; Ptenf/f castrated-veh	GPC4	NULL	7.32591	0.000596579	0.00205596	NaN	1	2.26548	133.269	6.41645	301.919	55.6539
854	1015	Nkx3.1CE2/+; Ptenf/f castrated-veh	4832420L08RIK	NULL	7.31378	0.000598223	0.00205939	NaN	1	2.66942	456.597	29.1631	1218.85	251.756
1124	1329	Nkx3.1CE2/+; Ptenf/f castrated-veh	9530081N05RIK	NULL	6.09955	0.000600878	0.00206629	NaN	1	2.13481	158.736	21.7668	338.87	65.4541
1012	1199	Nkx3.1CE2/+; Ptenf/f castrated-veh	DTX2	Mus musculus deltex 2 homolog (Drosophila) (Dtx2), mRNA.	6.57227	0.000601815	0.00206727	NaN	1	2.47132	579.679	70.1566	1432.57	301.326
791	945	Nkx3.1CE2/+; Ptenf/f castrated-veh	2310014H01RIK	PREDICTED: Mus musculus RIKEN cDNA 2310014H01 gene, transcript variant 3 (2310014H01Rik), mRNA.	7.64588	0.000603212	0.00206983	NaN	1	6.90045	533.421	20.5618	3680.84	1007.42
3152	113	Nkx3.1CE2/+ -veh	3110023E09RIK	NULL	-18.8927	0.000605656	0.00207539	NaN	1	5.49801	2531.42	181.579	460.425	108.762
3136	208	Nkx3.1CE2/+ -veh	1110021J02RIK	NULL	-14.7157	0.000606141	0.00207539	NaN	1	3.19801	1601.58	117.553	500.805	84.9916
16	22	Nkx3.1CE2/+; Ptenf/f castrated-veh	ZFP36L1	Mus musculus zinc finger protein 36, C3H type-like 1 (Zfp36l1), mRNA.	37.6815	0.000612793	0.0020937	NaN	1	3.31936	6025.26	599.461	20000	0
893	1060	Nkx3.1CE2/+; Ptenf/f castrated-veh	2900011L18RIK	NULL	7.11569	0.000612807	0.0020937	NaN	1	2.76742	167.791	14.4	464.349	99.9894
812	967	Nkx3.1CE2/+; Ptenf/f castrated-veh	NOTCH3	Mus musculus Notch gene homolog 3 (Drosophila) (Notch3), mRNA.	7.53657	0.000615055	0.00209912	NaN	1	5.08312	152.845	10.7723	776.927	201.934
802	957	Nkx3.1CE2/+; Ptenf/f castrated-veh	LAPTM5	Mus musculus lysosomal-associated protein transmembrane 5 (Laptm5), mRNA.	7.59785	0.00061671	0.00210251	NaN	1	11.3799	715.172	67.42	8138.59	2389.89
804	959	Nkx3.1CE2/+; Ptenf/f castrated-veh	BMP1	Mus musculus bone morphogenetic protein 1 (Bmp1), mRNA.	7.56867	0.000618576	0.00210661	NaN	1	6.83959	244.891	13.527	1674.95	460.776
806	961	Nkx3.1CE2/+; Ptenf/f castrated-veh	NCF4	Mus musculus neutrophil cytosolic factor 4 (Ncf4), mRNA.	7.56018	0.000623462	0.00212097	NaN	1	6.08654	140.449	9.33138	854.846	231.062
1187	1406	Nkx3.1CE2/+; Ptenf/f castrated-veh	4933407C03RIK	PREDICTED: Mus musculus RIKEN cDNA 4933407C03 gene, transcript variant 5 (4933407C03Rik), mRNA.	5.86598	0.000625257	0.0021248	NaN	1	2.3108	939.234	201.928	2170.38	427.288
911	1079	Nkx3.1CE2/+; Ptenf/f castrated-veh	PVRL2	Mus musculus poliovirus receptor-related 2 (Pvrl2), mRNA.	7.00572	0.000634181	0.00215282	NaN	1	2.496	1399.97	108.426	3494.32	714.263
995	1179	Nkx3.1CE2/+; Ptenf/f castrated-veh	LOC385291	NULL	6.65195	0.000636855	0.00215959	NaN	1	4.85939	176.354	50.3683	856.973	240.168
876	1041	Nkx3.1CE2/+; Ptenf/f castrated-veh	TNIK	PREDICTED: Mus musculus TRAF2 and NCK interacting kinase, transcript variant 1 (Tnik), mRNA.	7.20246	0.00063763	0.00215991	NaN	1	3.09182	257.393	21.5983	795.813	180.543
1040	1231	Nkx3.1CE2/+; Ptenf/f castrated-veh	GIMAP6	Mus musculus GTPase, IMAP family member 6 (Gimap6), mRNA.	6.45063	0.000639465	0.00216382	NaN	1	2.25077	158.131	17.244	355.916	71.0079
922	1094	Nkx3.1CE2/+; Ptenf/f castrated-veh	HK3	Mus musculus hexokinase 3 (Hk3), nuclear gene encoding mitochondrial protein, mRNA.	6.95787	0.000641199	0.00216508	NaN	1	3.28055	142.481	17.8036	467.416	111.566
819	977	Nkx3.1CE2/+; Ptenf/f castrated-veh	EG433182	Mus musculus predicted gene, EG433182 (EG433182), mRNA.	7.47081	0.000641203	0.00216508	NaN	1	4.04996	163.236	8.98083	661.1	162.616
1051	1244	Nkx3.1CE2/+; Ptenf/f castrated-veh	9930031P18RIK	NULL	6.40509	0.000643293	0.00216983	NaN	1	3.14358	420.945	81.3107	1323.27	325.314
1092	1289	Nkx3.1CE2/+; Ptenf/f castrated-veh	MTAP	Mus musculus methylthioadenosine phosphorylase (Mtap), mRNA.	6.22639	0.000646072	0.00217526	NaN	1	3.55373	339.7	89.705	1207.21	316.73
827	985	Nkx3.1CE2/+; Ptenf/f castrated-veh	FCGR2B	NULL	7.43577	0.000646274	0.00217526	NaN	1	4.82627	188.53	15.0362	909.895	236.628
870	1035	Nkx3.1CE2/+; Ptenf/f castrated-veh	PON3	Mus musculus paraoxonase 3 (Pon3), mRNA.	7.22345	0.00064854	0.00217842	NaN	1	5.51891	279.554	46.7653	1542.83	423.089
937	1112	Nkx3.1CE2/+; Ptenf/f castrated-veh	CD83	Mus musculus CD83 antigen (Cd83), mRNA.	6.89521	0.000648585	0.00217842	NaN	1	2.51555	142.771	12.5072	359.147	74.7948
855	1017	Nkx3.1CE2/+; Ptenf/f castrated-veh	P2RY5	Mus musculus purinergic receptor P2Y, G-protein coupled, 5 (P2ry5), mRNA.	7.31232	0.000649556	0.00217938	NaN	1	3.29514	1104.85	77.667	3640.65	842.141
1024	1211	Nkx3.1CE2/+; Ptenf/f castrated-veh	LOC672339	PREDICTED: Mus musculus similar to Ig kappa chain V-IV region S107B precursor (LOC672339), mRNA.	6.52337	0.000655879	0.00219827	NaN	1	2.80507	154.856	22.5098	434.383	99.9886
917	1088	Nkx3.1CE2/+; Ptenf/f castrated-veh	PARP8	Mus musculus poly (ADP-ribose) polymerase family, member 8 (Parp8), mRNA.	6.97434	0.000658718	0.00220546	NaN	1	3.16358	147.844	16.4492	467.716	109.801
2953	1425	Nkx3.1CE2/+ -veh	5430433G21RIK	PREDICTED: Mus musculus RIKEN cDNA 5430433G21 gene (5430433G21Rik), mRNA.	-5.81807	0.000659546	0.0022059	NaN	1	2.00552	767.816	59.378	382.851	138.839
1115	1317	Nkx3.1CE2/+; Ptenf/f castrated-veh	TSC22D1	Mus musculus TSC22 domain family, member 1 (Tsc22d1), transcript variant 2, mRNA.	6.13897	0.000661028	0.00220853	NaN	1	2.21192	429.582	95.3846	950.201	157.782
828	986	Nkx3.1CE2/+; Ptenf/f castrated-veh	AGPS	Mus musculus alkylglycerone phosphate synthase (Agps), mRNA.	7.43554	0.000661996	0.00220944	NaN	1	5.79158	264.684	21.601	1532.94	416.67
874	1039	Nkx3.1CE2/+; Ptenf/f castrated-veh	DAG1	Mus musculus dystroglycan 1 (Dag1), mRNA.	7.21203	0.000663386	0.00221175	NaN	1	2.28766	1018.66	233.406	2330.36	298.929
1089	1286	Nkx3.1CE2/+; Ptenf/f castrated-veh	AU020206	NULL	6.2378	0.000665778	0.00221739	NaN	1	2.82105	281.289	51.4286	793.53	187.534
957	1134	Nkx3.1CE2/+; Ptenf/f castrated-veh	TMEM119	Mus musculus transmembrane protein 119 (Tmem119), mRNA.	6.82117	0.000666475	0.00221739	NaN	1	3.23808	162.381	21.7338	525.803	126.628
1207	1431	Nkx3.1CE2/+; Ptenf/f castrated-veh	SMOX	Mus musculus spermine oxidase (Smox), mRNA.	5.79513	0.000668905	0.00222217	NaN	1	2.40814	977.437	214.29	2353.81	496.534
866	1031	Nkx3.1CE2/+; Ptenf/f castrated-veh	GSTT1	Mus musculus glutathione S-transferase, theta 1 (Gstt1), mRNA.	7.25548	0.000669313	0.00222217	NaN	1	6.30656	386.966	64.6471	2440.43	686.837
837	996	Nkx3.1CE2/+; Ptenf/f castrated-veh	TMEM2	Mus musculus transmembrane protein 2 (Tmem2), transcript variant 1, mRNA.	7.39258	0.000678735	0.0022491	NaN	1	3.03876	636.468	22.1683	1934.08	428.577
821	979	Nkx3.1CE2/+; Ptenf/f castrated-veh	RNF186	Mus musculus ring finger protein 186 (Rnf186), mRNA.	7.45924	0.00067884	0.0022491	NaN	1	12.9652	140.306	5.93078	1819.1	550.68
1091	1288	Nkx3.1CE2/+; Ptenf/f castrated-veh	PDK3	Mus musculus pyruvate dehydrogenase kinase, isoenzyme 3 (Pdk3), mRNA.	6.228	0.00068098	0.00225361	NaN	1	2.22387	634.234	77.2722	1410.46	285.058
1020	1207	Nkx3.1CE2/+; Ptenf/f castrated-veh	KIF23	NULL	6.5329	0.000682392	0.00225361	NaN	1	2.60678	152.477	18.9204	397.475	87.863
826	984	Nkx3.1CE2/+; Ptenf/f castrated-veh	ELK3	NULL	7.43734	0.000682865	0.00225361	NaN	1	4.64529	624.176	19.2713	2899.48	748.417
823	981	Nkx3.1CE2/+; Ptenf/f castrated-veh	GPR120	Mus musculus G protein-coupled receptor 120 (Gpr120), mRNA.	7.44849	0.000683714	0.00225361	NaN	1	27.7269	125.813	11.6539	3488.41	1104.69
833	991	Nkx3.1CE2/+; Ptenf/f castrated-veh	ARHGDIB	Mus musculus Rho, GDP dissociation inhibitor (GDI) beta (Arhgdib), mRNA.	7.41082	0.000683752	0.00225361	NaN	1	10.3931	290.905	31.1878	3023.42	900.367
830	988	Nkx3.1CE2/+; Ptenf/f castrated-veh	CORO1A	Mus musculus coronin, actin binding protein 1A (Coro1a), mRNA.	7.43122	0.000685452	0.00225687	NaN	1	11.217	390.056	34.6502	4375.26	1312.04
896	1063	Nkx3.1CE2/+; Ptenf/f castrated-veh	B130066H02RIK	NULL	7.09924	0.000687679	0.00226186	NaN	1	2.72352	280.51	19.0404	763.974	164.34
847	1008	Nkx3.1CE2/+; Ptenf/f castrated-veh	CD53	NULL	7.35416	0.000691015	0.00227048	NaN	1	5.09404	151.837	11.0523	773.463	206.206
838	997	Nkx3.1CE2/+; Ptenf/f castrated-veh	LOC100047579	PREDICTED: Mus musculus similar to transmembrane protein 20 (LOC100047579), mRNA.	7.38911	0.000696873	0.00228736	NaN	1	20.2629	226.225	51.6261	4583.96	1442.07
1148	1357	Nkx3.1CE2/+; Ptenf/f castrated-veh	GCNT2	Mus musculus glucosaminyl (N-acetyl) transferase 2, I-branching enzyme (Gcnt2), transcript variant 1, mRNA.	6.02665	0.000698555	0.00229051	NaN	1	3.03103	769.89	180.045	2333.56	582.187
1209	1433	Nkx3.1CE2/+; Ptenf/f castrated-veh	PFN2	Mus musculus profilin 2 (Pfn2), mRNA.	5.79464	0.000700526	0.00229312	NaN	1	2.86965	570.149	153.779	1636.13	394.615
947	1122	Nkx3.1CE2/+; Ptenf/f castrated-veh	TGFB1	Mus musculus transforming groNkx3.1CE2/+ h factor, beta 1 (Tgfb1), mRNA.	6.8557	0.000700894	0.00229312	NaN	1	2.73131	175.655	16.429	479.769	106.016
836	995	Nkx3.1CE2/+; Ptenf/f castrated-veh	TMPRSS4	Mus musculus transmembrane protease, serine 4 (Tmprss4), mRNA.	7.39659	0.000701519	0.00229312	NaN	1	15.7842	138.683	17.9632	2188.99	678.397
871	1036	Nkx3.1CE2/+; Ptenf/f castrated-veh	GJA1	Mus musculus gap junction membrane channel protein alpha 1 (Gja1), mRNA.	7.22153	0.000702582	0.00229335	NaN	1	5.78464	913.586	125.883	5284.76	1471.55
841	1000	Nkx3.1CE2/+; Ptenf/f castrated-veh	AI451557	Mus musculus expressed sequence AI451557 (AI451557), mRNA.	7.38238	0.000703034	0.00229335	NaN	1	6.39296	130.024	7.56707	831.242	232.348
3160	54	Nkx3.1CE2/+ -veh	ACTG2	Mus musculus actin, gamma 2, smooth muscle, enteric (Actg2), mRNA.	-25.9657	0.000704359	0.00229386	NaN	1	25.3519	12576.2	818.406	496.068	334.503
1160	1370	Nkx3.1CE2/+; Ptenf/f castrated-veh	NAP1L1	Mus musculus nucleosome assembly protein 1-like 1 (Nap1l1), mRNA.	5.99098	0.000705406	0.00229386	NaN	1	2.3424	708.593	111.611	1659.81	355.009
1217	1444	Nkx3.1CE2/+; Ptenf/f castrated-veh	NAT5	Mus musculus N-acetyltransferase 5 (ARD1 homolog, S. cerevisiae) (Nat5), mRNA.	5.75975	0.00070645	0.00229386	NaN	1	2.3226	1329.25	300.468	3087.32	614.628
938	1113	Nkx3.1CE2/+; Ptenf/f castrated-veh	GLIPR1	Mus musculus GLI pathogenesis-related 1 (glioma) (Glipr1), mRNA.	6.89263	0.000706796	0.00229386	NaN	1	3.05717	196.522	20.7507	600.801	140.588
868	1033	Nkx3.1CE2/+; Ptenf/f castrated-veh	PDGFB	NULL	7.23464	0.000707089	0.00229386	NaN	1	3.90807	190.56	14.9727	744.721	186.414
990	1174	Nkx3.1CE2/+; Ptenf/f castrated-veh	PLCD3	Mus musculus phospholipase C, delta 3 (Plcd3), mRNA.	6.66837	0.000707528	0.00229386	NaN	1	2.79591	300.988	35.4659	841.536	192.006
859	1022	Nkx3.1CE2/+; Ptenf/f castrated-veh	APOL7A	Mus musculus apolipoprotein L 7a (Apol7a), mRNA.	7.30159	0.000709665	0.00229534	NaN	1	7.06498	180.445	22.0131	1274.84	365.811
881	1046	Nkx3.1CE2/+; Ptenf/f castrated-veh	LOC100044122	PREDICTED: Mus musculus similar to Potassium voltage-gated channel, subfamily Q, member 1 (LOC100044122), mRNA.	7.18808	0.000709827	0.00229534	NaN	1	4.12882	164.949	15.5793	681.046	174.397
936	1111	Nkx3.1CE2/+; Ptenf/f castrated-veh	LOC100046343	PREDICTED: Mus musculus similar to CCR4-NOT transcription complex, subunit 6 (LOC100046343), mRNA.	6.896	0.000710152	0.00229534	NaN	1	2.57875	592.658	47.1954	1528.32	325.235
1005	1191	Nkx3.1CE2/+; Ptenf/f castrated-veh	KCTD1	Mus musculus potassium channel tetramerisation domain containing 1 (Kctd1), mRNA. XM_978900 XM_980194	6.6126	0.000715261	0.0023095	NaN	1	3.78985	1070.25	204.409	4056.1	1066.92
877	1042	Nkx3.1CE2/+; Ptenf/f castrated-veh	ARHGEF4	Mus musculus Rho guanine nucleotide exchange factor (GEF) 4 (Arhgef4), mRNA.	7.20062	0.000716485	0.00230951	NaN	1	6.3575	226.615	34.21	1440.7	410.056
1045	1237	Nkx3.1CE2/+; Ptenf/f castrated-veh	CIB1	Mus musculus calcium and integrin binding 1 (calmyrin) (Cib1), mRNA.	6.43848	0.00071672	0.00230951	NaN	1	2.24794	2911.83	291.707	6545.63	1319.3
906	1074	Nkx3.1CE2/+; Ptenf/f castrated-veh	AI607873	PREDICTED: Mus musculus expressed sequence AI607873 (AI607873), mRNA.	7.04267	0.000722323	0.00232521	NaN	1	4.21295	224.409	27.7826	945.423	247.167
856	1018	Nkx3.1CE2/+; Ptenf/f castrated-veh	C430004E15RIK	Mus musculus RIKEN cDNA C430004E15 gene (C430004E15Rik), mRNA.	7.30833	0.000728787	0.00234364	NaN	1	3.73599	483.064	17.8959	1804.72	442.007
867	1032	Nkx3.1CE2/+; Ptenf/f castrated-veh	APOBEC1	Mus musculus apolipoprotein B mRNA editing enzyme, catalytic polypeptide 1 (Apobec1), transcript variant 1, mRNA.	7.2352	0.000736664	0.00236657	NaN	1	5.5211	213.89	18.318	1180.91	325.441
1025	1212	Nkx3.1CE2/+; Ptenf/f castrated-veh	CDON	NULL	6.51978	0.000743741	0.00238689	NaN	1	2.99826	176.395	25.3331	528.877	127.414
862	1025	Nkx3.1CE2/+; Ptenf/f castrated-veh	MSN	NULL	7.28404	0.00074682	0.00239435	NaN	1	3.08531	203.648	3.99047	628.316	142.449
865	1029	Nkx3.1CE2/+; Ptenf/f castrated-veh	LYZ2	Mus musculus lysozyme 2 (Lyz2), mRNA.	7.2593	0.000749186	0.00239871	NaN	1	9.66864	808.287	96.814	7815.03	2357.51
857	1020	Nkx3.1CE2/+; Ptenf/f castrated-veh	CXCL15	Mus musculus chemokine (C-X-C motif) ligand 15 (Cxcl15), mRNA.	7.30452	0.000749693	0.00239871	NaN	1	49.5937	148.702	27.165	7374.66	2421.58
483	576	Nkx3.1CE2/+; Ptenf/f castrated-veh	2700038C09RIK	Mus musculus RIKEN cDNA 2700038C09 gene (2700038C09Rik), mRNA.	9.54686	0.000750899	0.00240015	NaN	1	2.21471	875.003	159.878	1937.88	152.47
858	1021	Nkx3.1CE2/+; Ptenf/f castrated-veh	BC024561	Mus musculus cDNA sequence BC024561 (BC024561), mRNA.	7.30172	0.000752866	0.00240173	NaN	1	77.9021	134.131	15.3969	10449.1	3458.94
1036	1226	Nkx3.1CE2/+; Ptenf/f castrated-veh	TWSG1	Mus musculus twisted gastrulation homolog 1 (Drosophila) (Twsg1), mRNA.	6.48119	0.000752906	0.00240173	NaN	1	2.12035	2155.1	178.351	4569.55	876.96
2971	1324	Nkx3.1CE2/+ -veh	FUT2	Mus musculus fucosyltransferase 2 (Fut2), mRNA.	-6.13747	0.000753979	0.00240274	NaN	1	2.12867	2290.54	229.196	1076.04	361.506
921	1093	Nkx3.1CE2/+; Ptenf/f castrated-veh	TTC30B	Mus musculus tetratricopeptide repeat domain 30B (Ttc30b), mRNA. XM_911984 XM_986297	6.95912	0.000755019	0.00240364	NaN	1	2.94418	251.493	20.1582	740.442	169.702
969	1149	Nkx3.1CE2/+; Ptenf/f castrated-veh	FGFR3	Mus musculus fibroblast groNkx3.1CE2/+ h factor receptor 3 (Fgfr3), mRNA.	6.77397	0.000764946	0.0024328	NaN	1	2.84242	134.194	13.0599	381.435	87.4511
993	1177	Nkx3.1CE2/+; Ptenf/f castrated-veh	EPS8L1	Mus musculus EPS8-like 1 (Eps8l1), mRNA.	6.66205	0.000769151	0.00244373	NaN	1	2.51642	151.885	13.8238	382.207	82.3942
1084	1281	Nkx3.1CE2/+; Ptenf/f castrated-veh	ADH1	Mus musculus alcohol dehydrogenase 1 (class I) (Adh1), mRNA.	6.25309	0.000771233	0.00244789	NaN	1	2.20801	3331.39	763.524	7355.74	1148.14
891	1058	Nkx3.1CE2/+; Ptenf/f castrated-veh	LOC100046255	PREDICTED: Mus musculus similar to homeobox protein (LOC100046255), mRNA.	7.12805	0.00077411	0.00245457	NaN	1	2.72446	130.939	5.48186	356.739	77.162
1022	1209	Nkx3.1CE2/+; Ptenf/f castrated-veh	ABR	Mus musculus active BCR-related gene (Abr), transcript variant 3, mRNA.	6.52824	0.000776844	0.00246078	NaN	1	2.20586	657.176	149.423	1449.64	209.17
1221	1451	Nkx3.1CE2/+; Ptenf/f castrated-veh	MAPK11	Mus musculus mitogen-activated protein kinase 11 (Mapk11), mRNA.	5.73397	0.000777913	0.00246171	NaN	1	2.33862	204.081	38.0061	477.269	103.544
907	1075	Nkx3.1CE2/+; Ptenf/f castrated-veh	SAMD14	Mus musculus sterile alpha motif domain containing 14 (Samd14), transcript variant 1, mRNA.	7.03851	0.000784519	0.00248014	NaN	1	4.80749	291.531	34.1239	1401.54	383.039
949	1124	Nkx3.1CE2/+; Ptenf/f castrated-veh	KCTD12	Mus musculus potassium channel tetramerisation domain containing 12 (Kctd12), mRNA.	6.84774	0.000790513	0.00249661	NaN	1	3.0764	232.572	21.5806	715.484	169.92
991	1175	Nkx3.1CE2/+; Ptenf/f castrated-veh	PHLDA1	Mus musculus pleckstrin homology-like domain, family A, member 1 (Phlda1), mRNA.	6.66517	0.000794568	0.00250692	NaN	1	7.69628	840.95	321.167	6472.19	2018.04
780	933	Nkx3.1CE2/+; Ptenf/f castrated-veh	GALNT11	Mus musculus UDP-N-acetyl-alpha-D-galactosamine:polypeptide N-acetylgalactosaminyltransferase 11 (Galnt11), mRNA.	7.68927	0.000800277	0.00252155	NaN	1	2.258	598.822	131.894	1352.14	150.786
880	1045	Nkx3.1CE2/+; Ptenf/f castrated-veh	MRG1	NULL	7.19166	0.00080156	0.00252155	NaN	1	8.93085	217.152	11.8061	1939.35	585.981
892	1059	Nkx3.1CE2/+; Ptenf/f castrated-veh	MARCKSL1	Mus musculus MARCKS-like 1 (Marcksl1), mRNA.	7.11878	0.000801591	0.00252155	NaN	1	9.30898	316.908	49.9701	2950.09	902.106
954	1129	Nkx3.1CE2/+; Ptenf/f castrated-veh	NAPSA	Mus musculus napsin A aspartic peptidase (Napsa), mRNA.	6.83943	0.000802955	0.00252295	NaN	1	2.66771	150.842	11.0751	402.401	88.7031
970	1150	Nkx3.1CE2/+; Ptenf/f castrated-veh	D130059P03RIK	Mus musculus RIKEN cDNA D130059P03 gene (D130059P03Rik), mRNA.	6.76702	0.000803624	0.00252295	NaN	1	2.96911	185.201	17.7771	549.883	129.451
1197	1417	Nkx3.1CE2/+; Ptenf/f castrated-veh	RASL10A	Mus musculus RAS-like, family 10, member A (Rasl10a), mRNA.	5.83464	0.000806163	0.00252842	NaN	1	2.22478	144.914	21.7038	322.402	67.8643
882	1047	Nkx3.1CE2/+; Ptenf/f castrated-veh	LOC331239	NULL	7.18428	0.000808133	0.00253167	NaN	1	15.2952	145.006	10.6769	2217.9	706.22
942	1117	Nkx3.1CE2/+; Ptenf/f castrated-veh	SLFN1	Mus musculus schlafen 1 (Slfn1), mRNA.	6.87674	0.000808796	0.00253167	NaN	1	3.13177	123.361	10.6678	386.339	92.4315
890	1057	Nkx3.1CE2/+; Ptenf/f castrated-veh	SCAMP5	Mus musculus secretory carrier membrane protein 5 (Scamp5), mRNA.	7.13206	0.0008101	0.00253326	NaN	1	5.97395	235.003	19.0494	1403.9	400.544
884	1049	Nkx3.1CE2/+; Ptenf/f castrated-veh	CXCL17	Mus musculus chemokine (C-X-C motif) ligand 17 (Cxcl17), mRNA.	7.17099	0.000812873	0.00253943	NaN	1	63.2747	146.955	18.6694	9298.56	3120.25
971	1151	Nkx3.1CE2/+; Ptenf/f castrated-veh	NOTCH1	Mus musculus Notch gene homolog 1 (Drosophila) (Notch1), mRNA.	6.76215	0.00081741	0.00255072	NaN	1	2.64511	586.453	46.0442	1551.23	343.101
944	1119	Nkx3.1CE2/+; Ptenf/f castrated-veh	RAP2A	Mus musculus RAS related protein 2a (Rap2a), mRNA.	6.87386	0.000818094	0.00255072	NaN	1	3.37288	171.018	16.0593	576.824	142.77
894	1061	Nkx3.1CE2/+; Ptenf/f castrated-veh	NAPEPLD	Mus musculus N-acyl phosphatidylethanolamine phospholipase D (Napepld), mRNA.	7.11536	0.000820556	0.00255588	NaN	1	5.38061	136.728	9.50856	735.682	205.743
900	1067	Nkx3.1CE2/+; Ptenf/f castrated-veh	IGK-V5	PREDICTED: Mus musculus immunoglobulin kappa chain variable 5 (V5 family) (Igk-V5), mRNA.	7.09112	0.000824188	0.00256456	NaN	1	19.6763	306.723	104.226	6035.16	1972.88
1030	1218	Nkx3.1CE2/+; Ptenf/f castrated-veh	5430435G22RIK	Mus musculus RIKEN cDNA 5430435G22 gene (5430435G22Rik), mRNA.	6.49846	0.000824959	0.00256456	NaN	1	2.84636	198.711	24.1362	565.604	133.998
1066	1262	Nkx3.1CE2/+; Ptenf/f castrated-veh	PGAM1	Mus musculus phosphoglycerate mutase 1 (Pgam1), mRNA.	6.34904	0.000837494	0.00259908	NaN	1	2.11549	882.041	188.845	1865.95	269.473
909	1077	Nkx3.1CE2/+; Ptenf/f castrated-veh	LOC630729	PREDICTED: Mus musculus similar to glutathione reductase 1 (LOC630729), mRNA.	7.02697	0.000837699	0.00259908	NaN	1	3.08349	389.541	18.3908	1201.15	281.52
1200	1420	Nkx3.1CE2/+; Ptenf/f castrated-veh	SLC39A8	Mus musculus solute carrier family 39 (metal ion transporter), member 8 (Slc39a8), mRNA.	5.81919	0.000839394	0.00260179	NaN	1	5.12849	295.7	146.636	1516.49	469.829
994	1178	Nkx3.1CE2/+; Ptenf/f castrated-veh	CSF2RA	Mus musculus colony stimulating factor 2 receptor, alpha, low-affinity (granulocyte-macrophage) (Csf2ra), mRNA.	6.65514	0.000845138	0.00261704	NaN	1	2.73075	351.422	31.8165	959.647	219.058
898	1065	Nkx3.1CE2/+; Ptenf/f castrated-veh	BC006779	Mus musculus cDNA sequence BC006779 (BC006779), mRNA. XM_001001098 XM_001003843 XM_001003848 XM_001003853 XM_001003857 XM_994341 XM_994355 XM_994381 XM_994398	7.09271	0.000847738	0.00262253	NaN	1	7.47509	242.115	17.3815	1809.83	540.789
1112	1314	Nkx3.1CE2/+; Ptenf/f castrated-veh	LOC636752	PREDICTED: Mus musculus similar to Ig kappa chain V-VI region NQ2-6.1 (LOC636752), mRNA.	6.15089	0.000848717	0.00262301	NaN	1	5.24535	181.143	68.689	950.159	290.376
899	1066	Nkx3.1CE2/+; Ptenf/f castrated-veh	2310007B03RIK	Mus musculus RIKEN cDNA 2310007B03 gene (2310007B03Rik), mRNA.	7.09257	0.000852087	0.00263086	NaN	1	6.82275	147.553	8.15957	1006.72	296.49
965	1145	Nkx3.1CE2/+; Ptenf/f castrated-veh	SPRR1A	Mus musculus small proline-rich protein 1A (Sprr1a), mRNA.	6.7905	0.000854242	0.00263495	NaN	1	4.36008	181.924	25.385	793.203	217.452
933	1107	Nkx3.1CE2/+; Ptenf/f castrated-veh	SLC23A3	Mus musculus solute carrier family 23 (nucleobase transporters), member 3 (Slc23a3), mRNA.	6.90966	0.00085666	0.00263984	NaN	1	6.57581	156.086	27.468	1026.4	306.046
1002	1187	Nkx3.1CE2/+; Ptenf/f castrated-veh	RNF130	Mus musculus ring finger protein 130 (Rnf130), mRNA.	6.63176	0.000858557	0.00264312	NaN	1	5.05862	1237.47	266.145	6259.87	1815.96
959	1136	Nkx3.1CE2/+; Ptenf/f castrated-veh	ALDOC	NULL	6.80683	0.000862652	0.00265316	NaN	1	6.95321	480.969	109.823	3344.28	1016.46
902	1070	Nkx3.1CE2/+; Ptenf/f castrated-veh	MS4A7	Mus musculus membrane-spanning 4-domains, subfamily A, member 7 (Ms4a7), transcript variant 1, mRNA.	7.06053	0.000863822	0.00265418	NaN	1	9.34561	188.927	14.0942	1765.63	545.595
1000	1184	Nkx3.1CE2/+; Ptenf/f castrated-veh	EMB	NULL	6.6382	0.000875993	0.00268641	NaN	1	6.18102	318.336	83.7679	1967.64	596.849
1281	1520	Nkx3.1CE2/+; Ptenf/f castrated-veh	LOC100046895	PREDICTED: Mus musculus similar to Quaking protein (LOC100046895), mRNA.	5.54143	0.000876898	0.00268641	NaN	1	2.52691	385.47	103.557	974.048	214.689
908	1076	Nkx3.1CE2/+; Ptenf/f castrated-veh	SAMD9L	PREDICTED: Mus musculus sterile alpha motif domain containing 9-like, transcript variant 1 (Samd9l), mRNA.	7.0318	0.000877218	0.00268641	NaN	1	12.4382	464.729	62.5973	5780.37	1847.79
915	1086	Nkx3.1CE2/+; Ptenf/f castrated-veh	LOC100046802	PREDICTED: Mus musculus similar to Inhbb protein (LOC100046802), mRNA.	6.98371	0.000878371	0.00268641	NaN	1	7.83576	209.357	28.3924	1640.47	500.198
2967	1344	Nkx3.1CE2/+ -veh	TTC39A	Mus musculus tetratricopeptide repeat domain 39A (Ttc39a), mRNA.	-6.08313	0.000878541	0.00268641	NaN	1	1.8714	4715.9	427.016	2519.99	649.92
1129	1335	Nkx3.1CE2/+; Ptenf/f castrated-veh	EPB4.9	Mus musculus erythrocyte protein band 4.9 (Epb4.9), mRNA.	6.0819	0.000880216	0.00268894	NaN	1	2.96112	210.361	37.9608	622.904	157.175
1086	1283	Nkx3.1CE2/+; Ptenf/f castrated-veh	LXN	Mus musculus latexin (Lxn), mRNA.	6.24486	0.000887208	0.00270769	NaN	1	3.14135	806.683	335.661	2534.08	483.446
910	1078	Nkx3.1CE2/+; Ptenf/f castrated-veh	C1QA	Mus musculus complement component 1, q subcomponent, alpha polypeptide (C1qa), mRNA.	7.02236	0.000888476	0.00270896	NaN	1	4.30042	221.45	7.34026	952.33	254.561
943	1118	Nkx3.1CE2/+; Ptenf/f castrated-veh	LOC100048770	PREDICTED: Mus musculus similar to Ig H-chain V-JH1-region (LOC100048770), mRNA.	6.87593	0.000889706	0.00270903	NaN	1	3.48521	127.132	9.40748	443.083	111.752
1111	1313	Nkx3.1CE2/+; Ptenf/f castrated-veh	ASPA	NULL	6.15197	0.000890207	0.00270903	NaN	1	2.78258	153.361	23.4031	426.738	103.678
984	1166	Nkx3.1CE2/+; Ptenf/f castrated-veh	FES	Mus musculus feline sarcoma oncogene (Fes), mRNA.	6.71528	0.000892529	0.00271349	NaN	1	4.01246	303.634	39.4969	1218.32	328.903
1243	1476	Nkx3.1CE2/+; Ptenf/f castrated-veh	RAB12	Mus musculus RAB12, member RAS oncogene family (Rab12), mRNA.	5.67549	0.000895953	0.00272128	NaN	1	2.02528	231.802	45.1386	469.464	80.2301
1178	1395	Nkx3.1CE2/+; Ptenf/f castrated-veh	SNX18	Mus musculus sorting nexin 18 (Snx18), mRNA.	5.9088	0.000896805	0.00272128	NaN	1	2.45485	943.939	267.35	2317.23	425.555
655	789	Nkx3.1CE2/+; Ptenf/f castrated-veh	IKBKB	NULL	8.27673	0.000904328	0.00273938	NaN	1	2.20858	549.278	112.022	1213.12	116.058
930	1103	Nkx3.1CE2/+; Ptenf/f castrated-veh	LOC238943	NULL	6.91344	0.000904495	0.00273938	NaN	1	3.59527	239.968	13.951	862.749	219.481
1256	1491	Nkx3.1CE2/+; Ptenf/f castrated-veh	MYH14	Mus musculus myosin, heavy polypeptide 14 (Myh14), mRNA.	5.64154	0.000907464	0.00274575	NaN	1	2.12775	140.61	21.2492	299.184	61.9238
914	1084	Nkx3.1CE2/+; Ptenf/f castrated-veh	LRP4	Mus musculus low density lipoprotein receptor-related protein 4 (Lrp4), mRNA.	6.98577	0.000909134	0.00274802	NaN	1	3.23413	198.764	4.42214	642.829	155.429
1023	1210	Nkx3.1CE2/+; Ptenf/f castrated-veh	PLCD1	NULL	6.52505	0.000909946	0.00274802	NaN	1	2.67474	314.633	29.3182	841.562	193.315
964	1144	Nkx3.1CE2/+; Ptenf/f castrated-veh	LOC218617	NULL	6.79379	0.000911912	0.00274814	NaN	1	2.84975	159.214	10.0835	453.721	105.208
918	1090	Nkx3.1CE2/+; Ptenf/f castrated-veh	CXCL1	Mus musculus chemokine (C-X-C motif) ligand 1 (Cxcl1), mRNA.	6.9672	0.000911962	0.00274814	NaN	1	11.436	135.734	18.3422	1552.26	496.826
1001	1185	Nkx3.1CE2/+; Ptenf/f castrated-veh	PLXDC1	Mus musculus plexin domain containing 1 (Plxdc1), mRNA.	6.63357	0.000912584	0.00274814	NaN	1	3.90682	168.211	23.0052	657.168	177.467
1165	1376	Nkx3.1CE2/+; Ptenf/f castrated-veh	APBB3	Mus musculus amyloid beta (A4) precursor protein-binding, family B, member 3 (Apbb3), mRNA.	5.95211	0.000922487	0.00277533	NaN	1	2.13362	230.67	25.9889	492.163	101.094
1074	1271	Nkx3.1CE2/+; Ptenf/f castrated-veh	UHRF1BP1L	Mus musculus UHRF1 (ICBP90) binding protein 1-like (Uhrf1bp1l), mRNA.	6.30381	0.000926236	0.00278299	NaN	1	2.35899	830.832	220.426	1959.92	308.646
1167	1378	Nkx3.1CE2/+; Ptenf/f castrated-veh	EXT1	Mus musculus exostoses (multiple) 1 (Ext1), mRNA.	5.94681	0.000926786	0.00278299	NaN	1	2.40406	683.522	95.2878	1643.22	371.293
1096	1295	Nkx3.1CE2/+; Ptenf/f castrated-veh	DUSP1	Mus musculus dual specificity phosphatase 1 (Dusp1), mRNA.	6.21749	0.000928461	0.00278538	NaN	1	2.34481	728.892	75.5697	1709.11	370.932
1062	1258	Nkx3.1CE2/+; Ptenf/f castrated-veh	RHOV	Mus musculus ras homolog gene family, member V (Rhov), mRNA.	6.35841	0.000930474	0.00278757	NaN	1	3.09776	155.981	21.7036	483.192	122.239
1186	1405	Nkx3.1CE2/+; Ptenf/f castrated-veh	ZFP809	Mus musculus zinc finger protein 809 (Zfp809), mRNA.	5.86787	0.000931336	0.00278757	NaN	1	2.73378	342.173	63.0436	935.424	230.9
919	1091	Nkx3.1CE2/+; Ptenf/f castrated-veh	LBCL1	NULL	6.96147	0.000931825	0.00278757	NaN	1	10.3983	211.788	12.6213	2202.23	699.56
939	1114	Nkx3.1CE2/+; Ptenf/f castrated-veh	ZC3H12D	Mus musculus zinc finger CCCH type containing 12D (Zc3h12d), mRNA.	6.89104	0.000936753	0.00279852	NaN	1	4.5421	131.798	9.20676	598.639	165.393
976	1156	Nkx3.1CE2/+; Ptenf/f castrated-veh	FXYD5	Mus musculus FXYD domain-containing ion transport regulator 5 (Fxyd5), mRNA.	6.75656	0.000937249	0.00279852	NaN	1	6.80607	421.511	83.457	2868.83	879.022
1099	1298	Nkx3.1CE2/+; Ptenf/f castrated-veh	RAC2	Mus musculus RAS-related C3 botulinum substrate 2 (Rac2), mRNA.	6.20791	0.000940884	0.00280673	NaN	1	3.59718	149.342	29.8074	537.209	147.081
1064	1260	Nkx3.1CE2/+; Ptenf/f castrated-veh	H2-T10	Mus musculus histocompatibility 2, T region locus 10 (H2-T10), mRNA.	6.35267	0.0009419	0.00280713	NaN	1	4.23163	462.227	97.8217	1955.97	558.678
1235	1467	Nkx3.1CE2/+; Ptenf/f castrated-veh	MGP	Mus musculus matrix Gla protein (Mgp), mRNA.	5.7072	0.000943645	0.00280969	NaN	1	2.27748	7694.37	1197.33	17523.7	3862.41
925	1097	Nkx3.1CE2/+; Ptenf/f castrated-veh	LOC100044439	PREDICTED: Mus musculus similar to cytochrome P450 CYP4F18 (LOC100044439), mRNA.	6.94593	0.000944625	0.00280997	NaN	1	7.955	154.493	5.56317	1229	378.661
1044	1236	Nkx3.1CE2/+; Ptenf/f castrated-veh	DOK3	Mus musculus docking protein 3 (Dok3), mRNA.	6.43928	0.000946874	0.00281403	NaN	1	4.23486	223.084	42.1802	944.729	267.727
927	1099	Nkx3.1CE2/+; Ptenf/f castrated-veh	CSPRS	Mus musculus component of Sp100-rs (Csprs), mRNA.	6.93967	0.000949827	0.00282016	NaN	1	48.1346	148.102	19.5955	7128.84	2462.04
940	1115	Nkx3.1CE2/+; Ptenf/f castrated-veh	RHOC	Mus musculus ras homolog gene family, member C (Rhoc), mRNA.	6.88631	0.000951836	0.00282198	NaN	1	4.54262	195.912	11.4389	889.954	246.173
967	1147	Nkx3.1CE2/+; Ptenf/f castrated-veh	LOC214403	NULL	6.78086	0.000952217	0.00282198	NaN	1	3.39075	258.229	17.9954	875.59	221.302
1185	1404	Nkx3.1CE2/+; Ptenf/f castrated-veh	SLC11A1	Mus musculus solute carrier family 11 (proton-coupled divalent metal ion transporters), member 1 (Slc11a1), mRNA.	5.871	0.000955196	0.00282816	NaN	1	2.78049	855.734	156.444	2379.36	594.101
2997	1137	Nkx3.1CE2/+ -veh	5330417C22RIK	NULL	-6.83844	0.000956581	0.00282963	NaN	1	2.60526	6884.28	109.924	2642.46	1517.28
1114	1316	Nkx3.1CE2/+; Ptenf/f castrated-veh	CAT	NULL	6.14327	0.000960465	0.00283834	NaN	1	2.86211	412.849	61.5601	1181.62	293.679
1278	1516	Nkx3.1CE2/+; Ptenf/f castrated-veh	GSTA3	Mus musculus glutathione S-transferase, alpha 3 (Gsta3), transcript variant 2, mRNA.	5.55385	0.000961317	0.00283834	NaN	1	3.10637	1256.64	370.238	3903.59	1042.99
3132	227	Nkx3.1CE2/+ -veh	IMPDH1	Mus musculus inosine 5'-phosphate dehydrogenase 1 (Impdh1), mRNA.	-14.1523	0.000968488	0.00285686	NaN	1	2.52911	877.294	59.4093	346.878	38.4813
1032	1220	Nkx3.1CE2/+; Ptenf/f castrated-veh	LOC100046616	PREDICTED: Mus musculus similar to aquaporin 5 (LOC100046616), mRNA.	6.48976	0.000970596	0.00286042	NaN	1	2.55158	123.562	10.0074	315.279	70.8865
932	1106	Nkx3.1CE2/+; Ptenf/f castrated-veh	CASP1	Mus musculus caspase 1 (Casp1), mRNA.	6.91023	0.000971719	0.00286107	NaN	1	16.3516	193.398	3.47453	3162.37	1052.19
1110	1312	Nkx3.1CE2/+; Ptenf/f castrated-veh	SOCS5	Mus musculus suppressor of cytokine signaling 5 (Socs5), mRNA.	6.15286	0.000973855	0.0028647	NaN	1	2.44075	374.475	42.1052	914.002	206.136
1093	1291	Nkx3.1CE2/+; Ptenf/f castrated-veh	LOC100044430	PREDICTED: Mus musculus similar to Interferon activated gene 205 (LOC100044430), mRNA.	6.22284	0.000975988	0.00286832	NaN	1	2.90187	175.355	24.2085	508.858	126.656
1293	1532	Nkx3.1CE2/+; Ptenf/f castrated-veh	6330534C20RIK	Mus musculus RIKEN cDNA 6330534C20 gene (6330534C20Rik), mRNA.	5.4978	0.00097821	0.00287219	NaN	1	2.16622	167.273	36.5278	362.35	69.8751
711	853	Nkx3.1CE2/+; Ptenf/f castrated-veh	PAWR	Mus musculus PRKC, apoptosis, Nkx3.1CE2/+ 1, regulator (Pawr), mRNA.	8.02951	0.000980776	0.00287706	NaN	1	2.20298	809.838	168.933	1784.05	176.76
1004	1190	Nkx3.1CE2/+; Ptenf/f castrated-veh	TSPAN33	Mus musculus tetraspanin 33 (Tspan33), mRNA.	6.61648	0.000982508	0.00287945	NaN	1	5.07947	186.734	31.051	948.509	278.358
961	1140	Nkx3.1CE2/+; Ptenf/f castrated-veh	CASP4	Mus musculus caspase 4, apoptosis-related cysteine peptidase (Casp4), mRNA.	6.79841	0.000983403	0.00287945	NaN	1	5.97427	175.999	19.4651	1051.47	313.983
951	1126	Nkx3.1CE2/+; Ptenf/f castrated-veh	HCST	Mus musculus hematopoietic cell signal transducer (Hcst), mRNA.	6.84196	0.000988358	0.00289108	NaN	1	3.1589	153.501	5.10091	484.895	118.418
1090	1287	Nkx3.1CE2/+; Ptenf/f castrated-veh	SLAMF9	Mus musculus SLAM family member 9 (Slamf9), mRNA.	6.22808	0.000989198	0.00289108	NaN	1	2.97571	347.585	48.4758	1034.31	260.807
953	1128	Nkx3.1CE2/+; Ptenf/f castrated-veh	ITGB6	Mus musculus integrin beta 6 (Itgb6), mRNA.	6.84087	0.000990407	0.00289195	NaN	1	7.79672	175.586	17.8228	1368.99	426.521
978	1158	Nkx3.1CE2/+; Ptenf/f castrated-veh	2410004L22RIK	Mus musculus RIKEN cDNA 2410004L22 gene (2410004L22Rik), mRNA.	6.75032	0.000991427	0.00289227	NaN	1	2.47687	165.427	6.57778	409.74	88.1274
952	1127	Nkx3.1CE2/+; Ptenf/f castrated-veh	C130026I21RIK	Mus musculus RIKEN cDNA C130026I21 gene (C130026I21Rik), transcript variant 1, mRNA.	6.84174	0.000992896	0.0028939	NaN	1	12.2143	177.919	28.3326	2173.16	713.193
1127	1332	Nkx3.1CE2/+; Ptenf/f castrated-veh	TNS3	Mus musculus tensin 3 (Tns3), mRNA.	6.08808	0.000995552	0.00289898	NaN	1	2.65052	1538.11	206.126	4076.79	977.217
1280	1519	Nkx3.1CE2/+; Ptenf/f castrated-veh	RNF219	Mus musculus ring finger protein 219 (Rnf219), mRNA.	5.54755	0.000997093	0.0029008	NaN	1	2.48086	198.101	39.9412	491.462	116.486
